# Supplementary material for: Health postservice readiness and use of preventive and curative services for suspected childhood pneumonia in Ethiopia: a cross-sectional study
Source: PubMed Central journal article supplement (PMC9047705; doi:10.1136/bmjopen-2021-058055), 2022-04-26
Supplement: bmjopen-2021-058055.draft_revisions.pdf [file bmjopen-2021-058055.draft_revisions.pdf]

# BMJ Open

BMJ Open is committed to open peer review. As part of this commitment we make the peer review history of every article we publish publicly available.

When an article is published we post the peer reviewers' comments and the authors' responses online. We also post the versions of the paper that were used during peer review. These are the versions that the peer review comments apply to.

The versions of the paper that follow are the versions that were submitted during the peer review process. They are not the versions of record or the final published versions. They should not be cited or distributed as the published version of this manuscript.

BMJ Open is an open access journal and the full, final, typeset and author-corrected version of record of the manuscript is available on our site with no access controls, subscription charges or pay-per-view fees (<http://bmjopen.bmj.com>).

If you have any questions on BMJ Open's open peer review process please email [info.bmjopen@bmj.com](mailto:info.bmjopen@bmj.com)

# BMJ Open

## Health post service readiness and use of preventive and curative services for suspected childhood pneumonia in Ethiopia: a cross-sectional study

|                               |                                                                                                                                                                                                                                                                                                                                                                                                                                                 |
|-------------------------------|-------------------------------------------------------------------------------------------------------------------------------------------------------------------------------------------------------------------------------------------------------------------------------------------------------------------------------------------------------------------------------------------------------------------------------------------------|
| Journal:                      | <i>BMJ Open</i>                                                                                                                                                                                                                                                                                                                                                                                                                                 |
| Manuscript ID                 | bmjopen-2021-058055                                                                                                                                                                                                                                                                                                                                                                                                                             |
| Article Type:                 | Original research                                                                                                                                                                                                                                                                                                                                                                                                                               |
| Date Submitted by the Author: | 05-Oct-2021                                                                                                                                                                                                                                                                                                                                                                                                                                     |
| Complete List of Authors:     | Woldemariam, Amare; University of Gondar, Human Nutrition; Berhane, Yemane; Addis Continental Institute of Public Health, Worku, Alemayehu; Addis Ababa University, School of Public Health Biks, Gashaw ; University of Gondar, Public Health ; NA Persson, Lars; London School of Hygiene and Tropical Medicine, Okwaraji, Yemisrach; London School of Hygiene & Tropical Medicine, Epidemiology and Population Health; 74B Beaconfield Road, |
| Keywords:                     | Public health < INFECTIOUS DISEASES, Community child health < PAEDIATRICS, Respiratory infections < THORACIC MEDICINE, Health policy < HEALTH SERVICES ADMINISTRATION & MANAGEMENT                                                                                                                                                                                                                                                              |
|                               |                                                                                                                                                                                                                                                                                                                                                                                                                                                 |

SCHOLARONE™  
Manuscripts

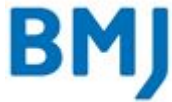

I, the Submitting Author has the right to grant and does grant on behalf of all authors of the Work (as defined in the below author licence), an exclusive licence and/or a non-exclusive licence for contributions from authors who are: i) UK Crown employees; ii) where BMJ has agreed a CC-BY licence shall apply, and/or iii) in accordance with the terms applicable for US Federal Government officers or employees acting as part of their official duties; on a worldwide, perpetual, irrevocable, royalty-free basis to BMJ Publishing Group Ltd ("BMJ") its licensees and where the relevant Journal is co-owned by BMJ to the co-owners of the Journal, to publish the Work in this journal and any other BMJ products and to exploit all rights, as set out in our [licence](#).

The Submitting Author accepts and understands that any supply made under these terms is made by BMJ to the Submitting Author unless you are acting as an employee on behalf of your employer or a postgraduate student of an affiliated institution which is paying any applicable article publishing charge ("APC") for Open Access articles. Where the Submitting Author wishes to make the Work available on an Open Access basis (and intends to pay the relevant APC), the terms of reuse of such Open Access shall be governed by a Creative Commons licence – details of these licences and which [Creative Commons](#) licence will apply to this Work are set out in our licence referred to above.

Other than as permitted in any relevant BMJ Author's Self Archiving Policies, I confirm this Work has not been accepted for publication elsewhere, is not being considered for publication elsewhere and does not duplicate material already published. I confirm all authors consent to publication of this Work and authorise the granting of this licence.

# Health post service readiness and use of preventive and curative services for suspected childhood pneumonia in Ethiopia: a cross-sectional study

Amare Tariku<sup>1,2\*</sup>, Yemane Berhane<sup>2</sup>, Alemayehu Worku<sup>2,3</sup>, Gashaw Andargie Biks<sup>4</sup>, Lars Åke Persson<sup>5,6</sup>, Yemisrach B. Okwaraji<sup>5,6</sup>

<sup>1</sup>Department of Human Nutrition, Institute of Public Health, College of Medicine and Health Sciences, University of Gondar, Gondar, Ethiopia

<sup>2</sup>Department of Epidemiology and Biostatistics and Department of Reproductive Health and Population, Addis Continental Institute of Public Health, Addis Ababa, Ethiopia

<sup>3</sup>School of Public Health, Addis Ababa University, Addis Ababa, Ethiopia

<sup>4</sup>Department of Health System and Policy, Institute of Public Health, College of Medicine and Health Sciences, University of Gondar, Gondar, Ethiopia

<sup>5</sup>London School of Hygiene & Tropical Medicine, London, UK

<sup>6</sup>Ethiopian Public Health Institute, Addis Ababa, Ethiopia

## Co-authors;

Yemane Berhane, MD, PhD: [yemaneberhane@addiscontinental.edu.et](mailto:yemaneberhane@addiscontinental.edu.et)

Alemayehu Worku, PhD: [alemayehuwy@yahoo.com](mailto:alemayehuwy@yahoo.com)

Gashaw Andargie Biks, PhD: [gashawab@gmail.com](mailto:gashawab@gmail.com)

Lars Åke Persson, MD, PhD: [Lars.Persson@lshtm.ac.uk](mailto:Lars.Persson@lshtm.ac.uk)

Yemisrach B. Okwaraji, PhD: [yemisrach.okwaraji@lshtm.ac.uk](mailto:yemisrach.okwaraji@lshtm.ac.uk)

## \*Corresponding author:

Amare Tariku, MSc; [amaretariku15@yahoo.com](mailto:amaretariku15@yahoo.com)

## ABSTRACT

**Objective:** Pneumonia is the single leading cause of infectious disease deaths in children under-five. Despite this challenge, the utilization of preventive and curative child health services remains low in Ethiopia. We investigated the association between health post service readiness and caregivers' awareness of pneumonia services, care-seeking, and utilisation of pneumonia-relevant immunisation in four Ethiopian regions.

**Design and setting:** This cross-sectional study was conducted from December 2018 to February 2019. The readiness of health posts for sick child care was assessed using the World Health Organization Health Service Availability and Readiness Assessment tool. A multilevel analysis was employed to examine the association between health post readiness and household level awareness and utilisation of services.

**Participants:** We included 165 health posts, 274 health extension workers (community health workers), and 4,729 caregivers with 5,787 children 2-59 months.

**Outcome measures:** Awareness of pneumonia treatment, care-seeking behaviour, and pentavalent-3 immunisation.

**Results:** Only 62.8% of health posts were ready to provide sick child care services. Approximately one-quarter of caregivers were aware of pneumonia services, and 56.8% sought an appropriate care provider for suspected pneumonia. Nearly half (49.3%) of children 12-23 months had received three doses of pentavalent vaccine. General health post readiness was not associated with the caregiver's awareness of pneumonia treatment [AOR= 0.9, 95% CI 0.7 to 1.1] and utilization of pentavalent-3 immunisation [AOR= 1.2, 95% CI 0.8 to 1.6], but negatively associated with care-seeking for childhood illnesses [AOR= 0.6, 95% CI 0.4 to 0.8].

**Conclusion:** We found no association between facility readiness and awareness or utilisation of child health services. There were significant deficiencies in health post preparedness for services. Caregivers had low awareness and utilisation of preventive and curative pneumonia-related services. The results underline the importance of enhancing facility preparedness, providing high-quality care, and intensifying demand generation efforts to prevent and treat pneumonia.

**Keywords:** Childhood pneumonia; Health post preparedness; Health care utilisation; Ethiopia

### Strengths and limitations of this study

- This is the first study, which assessed the association between first-level healthcare facilities and caregiver's awareness and utilisation of pneumonia relevant preventive and curative services in four of the most populous Ethiopian regions.
- Health post preparedness was assessed using the standard World Health Organization Health Service Availability and Readiness Assessment tool.
- We ascertained information on the utilisation of pneumonia-related preventive and curative services with methods used by Demographic and Health Surveys, despite this assessment of care-seeking behaviour and pentavalent immunisation by caregivers' recall might be influenced by bias.
- The study was conducted in 52 districts of four Ethiopian regions and assessed facility readiness at the health post level. Hence, the findings may not be generalized to other geographic areas and health system levels.

### INTRODUCTION

Worldwide, pneumonia is responsible for one-fifth of all under-five deaths <sup>1</sup>. Nearly half (49%) of these deaths occur in four low- and middle-income countries, including Ethiopia <sup>2 3</sup>. There are effective preventive measures, including immunisation and antibiotics that can prevent or treat most cases of pneumonia. Despite these resources, children in low-income countries continue to suffer and die from pneumonia due to lack of access to or availability of these services <sup>4</sup>.

The World Health Organization and UNICEF introduced the integrated Community Case Management (iCCM) strategy in 2004 to increase access and quality of services for childhood pneumonia, diarrhea, and malaria. Effective implementation of this strategy requires uninterrupted stock of drugs and supplies, trained community health workers, and community awareness of these services <sup>5 6</sup>. Nevertheless, studies in low-income countries reveal that less than a fifth of sick children were brought to relevant health services for suspected pneumonia <sup>7 8</sup>. This low level of care-seeking has, among other things, been attributed to the poor quality of health services <sup>9</sup>. A majority of the facilities in these settings have reportedly not had essential drugs, supplies and trained community health workers <sup>10-13</sup>. The general service readiness index for sick child care has varied between 19% and 69% in reports from Sub-Saharan African countries <sup>11 13</sup>. The readiness has been lower in rural areas and at the lowest primary healthcare level <sup>14-17</sup>. In Ethiopia, earlier reports have shown a lack of iCCM drugs and supplies at health posts <sup>9 18</sup>.

1  
2  
3 Inadequate preparedness and low service quality at the primary healthcare level reduce parents thrust  
4 and utilisation of health services <sup>11 19-21</sup>. In Ethiopia, low utilisation of iCCM services was also attributed to  
5 absent supervision and refresher training of health extension workers <sup>22-27</sup>. We have earlier shown that a  
6 substantial proportion of caregivers were not aware of pneumonia-related health services and, therefore,  
7 less likely to seek care when their children got sick or get their children immunised <sup>28 29</sup>. The low utilisation  
8 of iCCM services has also been attributed to the lack of readiness of health posts to care for sick children  
9 <sup>19 30 31</sup>. Thus, there are reasons to investigate the primary-level health facility preparedness to provide child  
10 health services and whether this is associated with the coverage of pneumonia-related preventive and  
11 treatment services. In Ethiopia, under-five mortality was reported to be 55/1000 live births in the 2019  
12 Demographic and Health Survey. Although reduced in recent decades, the persistently high level and  
13 continued pneumonia deaths call for intensified efforts to reduce these preventable deaths <sup>28 32</sup>. The  
14 Ethiopian Ministry of Health in collaboration with non-governmental organisations implemented the  
15 complex community-based intervention labelled Optimizing the Health Extension Program (OHEP)  
16 intervention in four of the most populous regions. The OHEP aimed to contribute to reductions in under-  
17 five child mortality through enhancing utilisation of iCCM and community-based newborn care (CBNC)  
18 services <sup>33</sup>. This study was part of the evaluation of OHEP intervention. We aimed to examine the  
19 association between the health post readiness to serve and caregiver's awareness of pneumonia-related  
20 services, care seeking for sick children, and whether their 12-23 months old children had got three  
21 pentavalent vaccinations.

## 32 33 34 35 36 **METHODS**

### 37 38 **Study setting and design**

39  
40 The Ethiopian primary healthcare system typically consists of a primary hospital, a health centre and five  
41 satellite health posts. A health post is the lowest service delivery point staffed by two health extension  
42 workers serving around 5,000 rural residents. Since 2003, Ethiopia has implemented the health extension  
43 program to achieve universal health coverage in rural areas. The integrated community case management  
44 (iCCM) of childhood illnesses is one of the components of this national programme. As part of this  
45 programme, the health extension workers examine, classify, and treat pneumonia. The OHEP  
46 encompassed three intervention strategies, i.e., community engagement activities, capacity building of  
47 health extension workers and women's development group leaders, and strengthening of the district  
48 health services' ownership and accountability of the primary newborn and child health services. The  
49 intervention was conducted in 26 intervention districts with 26 comparison districts spread in four regions

1  
2  
3 of Ethiopia, namely Tigray, Amhara, Oromia and Southern Nations, Nationalities and Peoples Regions. The  
4 intervention started in 2016 and was completed in 2018. For the evaluation, baseline and end line surveys  
5 were performed. This paper reports a secondary analysis of end line cross-sectional data <sup>33</sup>.  
6  
7

### 8 9 **Participants**

10  
11 This study included all caregivers and children aged 2 to 59 months, who resided in 52 study districts. It  
12 also includes all health posts with one or two health extension workers per health post serving these  
13 families.  
14  
15

### 16 17 **Sampling**

18  
19 Sample size for the end line survey was estimated to measure changes in care-seeking and appropriate  
20 treatment for childhood illnesses following the implementation of the OHEP intervention. Assumptions  
21 considered for the sample size calculation for the main OHEP evaluation <sup>34</sup> were 80% power to detect  
22 differences of 15 and 20 percentage points, respectively, in the reported level of care seeking (55%) and  
23 appropriate treatment for childhood illnesses (47%) at the baseline, design effect of 1.001 and 90%  
24 completeness. Accordingly, a sample size of 12,000 households was obtained. With this number of  
25 households, 6,532 children below the age of five years were expected to be reached by the survey, of  
26 whom 368 were assumed to have any illnesses and 308 to have suspected pneumonia within two weeks  
27 before the survey.  
28  
29

30  
31 The parent study used a sampling frame generated based on the 2007 Ethiopian Central Statistical Agency  
32 housing and population survey. Two hundred enumeration areas, i.e., clusters, were selected from 52  
33 study districts with probability proportional to size. A two-staged cluster sampling followed by systematic  
34 sampling to select 60 representative households from each study cluster. All caregivers of children aged  
35 2-59 months living in the selected households were interviewed. Moreover, all health posts and one  
36 health extension worker from each health post serving the population of the study clusters were included.  
37  
38

### 39 40 **Data collection**

41  
42 Data were collected using structured and pre-tested interviewer-administered questionnaires through an  
43 electronic data collection software (CSpro survey software). The questionnaires were translated into local  
44 languages (Amharic, Tigrigna, and Oromiffa) and back-translated into English. They comprised of three  
45 main modules; household, healthcare provider and health facility modules. Data collectors and  
46  
47



1  
2  
3 supervisors, who had bachelor's degree or above, were trained for two weeks on data collection  
4 techniques, procedures, quality assurance, and ethical considerations of the study. Further detailed  
5 information about data collection and quality control is available in the published study protocol<sup>33</sup>.  
6  
7

## 8 9 **Outcomes**

10  
11 The outcomes of this study are caregiver's awareness of pneumonia treatment, care-seeking behaviour  
12 and coverage of pentavalent-3 immunisation as defined in the Demographic and Health Surveys<sup>28</sup>. The  
13 awareness of availability of pneumonia treatment was calculated as the proportion of caregivers who had  
14 heard messages regarding pneumonia treatment. Suspected pneumonia was ascertained by asking the  
15 caregiver if the child had cough combined with either fast or difficult breathing due to chest problems  
16 within two weeks before the survey. Care-seeking was defined as children with suspected pneumonia for  
17 whom advice or treatment was sought from an appropriate care provider, i.e., either government or  
18 private providers. The vaccination status of children aged 12-23 months was primarily assessed by  
19 reviewing immunisation cards. When cards were not available at home, the caregivers were requested to  
20 report the type of vaccines their children had received. Hence, coverage of pentavalent vaccination was  
21 estimated as the proportion of children 12-23 months who had received three doses of pentavalent  
22 vaccine.  
23  
24  
25  
26  
27  
28  
29  
30  
31

## 32 33 **Health post readiness**

34  
35 The readiness of health posts for sick child care was assessed using the World Health Organization Service  
36 Availability and Readiness Assessment tool<sup>35</sup>. Using 23 tracer items, the preparedness of facilities was  
37 shown in five domains or indices, i.e., basic amenities, basic equipment, standard precaution equipment  
38 for infection prevention, diagnostic capacity, and essential medicines. The mean availability of items  
39 across the four domains of readiness was estimated by assigning equal weight for each of the items, and  
40 was expressed as a proportion. Health post's diagnostic capacity was shown as the proportion of facilities  
41 having rapid diagnostic test for malaria. The general service readiness was calculated as the average of  
42 percentages depicting mean availability of tracer items in five indices<sup>35</sup>. The availability of vaccination at  
43 the health posts was also estimated. The number of health extension workers working in the health post  
44 and the percentage of these workers trained for iCCM and who had received supportive supervision  
45 during six months before the survey were also calculated. The health post demand generation activities  
46 were recorded as the proportion of health post showing opening days or that used community forums to  
47 deliver maternal and child health education.  
48  
49  
50  
51  
52  
53  
54  
55  
56  
57

## Analyses

The household socio-economic status was constructed through principal component analysis of household assets, ownership of house, livestock, agricultural land, and access to utilities and infrastructures. The factor scores were summed and ranked into quintiles from the poorest to the least poor.

The study linked the household, health facility and care provider information. Our analysis was based on linked samples for outcome variables, i.e., caregivers' awareness of pneumonia treatment (n=4,934), care seeking when the child was sick (n=613) and vaccination of 12-23 months old children with third dose of pentavalent immunisation (n=860). Care-seeking was assessed for all childhood illness episodes, including symptoms of suspected pneumonia as reported by caregiver for the two weeks prior to the survey. The effect of clustering on three of the study outcomes was examined by estimating Intra Cluster Correlation Coefficient (ICC). A multilevel binary logistic regression model was fitted to examine the association between health post readiness and household level awareness, care-seeking and utilisation of three doses of pentavalent vaccinations. We checked for potential household-level confounders. The fitness of the model was checked through Likelihood Ratio Test. Data were analysed using Stata version-14.

## Patient and public involvement

Patients or the public were not involved in the design or conduct or reporting or dissemination plans of this research.

## RESULTS

### Characteristics of caregivers and children

A total of 10,785 households from 181 study clusters, 165 health posts and 274 health extension workers were included in the survey. A total of 4,729 eligible caregivers with 5,787 children aged 2-59 months were included in the analyses. A majority of the caregivers had no schooling (59.4%) and were currently married (88.6%). About two-thirds (64.0%) of caregivers were able to access the nearest health facility within 30 minutes of walk from their home (Table 1).

Table 1 Socio-demographic characteristics of caregivers and children aged 2-59 months in four regions of Ethiopia, December 2018 to February 2019

| Characteristics                                                      | Frequency | Percentage |
|----------------------------------------------------------------------|-----------|------------|
| Caregiver's characteristics (n=4,729)                                |           |            |
| Age                                                                  |           |            |
| <25                                                                  | 885       | 18.7       |
| 25-29                                                                | 1,281     | 27.1       |
| 30-34                                                                | 1,038     | 22.0       |
| 35-39                                                                | 867       | 18.3       |
| >=40                                                                 | 658       | 13.9       |
| Marital status                                                       |           |            |
| Currently married                                                    | 4,067     | 88.6       |
| Unmarried                                                            | 521       | 11.4       |
| Education                                                            |           |            |
| No schooling                                                         | 2,810     | 59.4       |
| Schooling                                                            | 1,919     | 40.6       |
| Number of children under five                                        |           |            |
| 1                                                                    | 3,487     | 73.7       |
| 2                                                                    | 1,148     | 24.3       |
| 3+                                                                   | 94        | 2.0        |
| Socio-economic quintiles                                             |           |            |
| Q1 (poorest)                                                         | 1,024     | 21.7       |
| Q2                                                                   | 982       | 20.8       |
| Q3                                                                   | 874       | 18.5       |
| Q4                                                                   | 895       | 18.9       |
| Q5 (least poor)                                                      | 954       | 20.1       |
| Walking distance from household to nearest health facility (n=3,918) |           |            |
| <=30 minutes                                                         | 2,507     | 64.0       |
| >30 minute                                                           | 1,411     | 36.0       |
| Child (2-59 months) characteristics (n=5,787)                        |           |            |
| Sex                                                                  |           |            |
| Male                                                                 | 2,961     | 51.2       |
| Female                                                               | 2,826     | 49.8       |
| Age                                                                  |           |            |
| 2-11 Months                                                          | 959       | 16.6       |
| 12-23 Months                                                         | 992       | 17.1       |
| 24-35 Months                                                         | 1114      | 19.3       |
| 36-59 Months                                                         | 2722      | 47.0       |

### Characteristics of health posts and health extension workers

The median number of households served by the health post was 1,181. The majority (85.1%) of the health posts were functionally open for five days or more per week. More than a tenth (12.7%) of the health posts were served by only one health extension worker. Most (78.8%) of the health extension workers were trained in the integrated community Case Management of childhood illnesses. More than three-fourth (78.8%) had received supportive supervision within six months preceding the survey. Three-

quarters used community forums or meetings to deliver maternal and child health education within three months prior to the survey (Table 2).

Table 2 Characteristics of health post in four regions of Ethiopia, December 2018 to February 2019

| Characteristics                                                         | Frequency         | Percentage |
|-------------------------------------------------------------------------|-------------------|------------|
| Health posts catchment area population (n=165)                          |                   |            |
| Number of households, median (Inter-quartile range)                     | 1,181 (841, 1572) |            |
| Number of children under five years, median (Inter-quartile range)      | 780 (493, 1065)   |            |
| Health extension workers' characteristics (274)                         |                   |            |
| Number of health extension workers per health post                      |                   |            |
| One                                                                     | 35                | 12.7       |
| Two                                                                     | 142               | 51.8       |
| Three and above                                                         | 97                | 35.4       |
| Health post opening days per week                                       |                   |            |
| 1 to 4 days                                                             | 41                | 14.9       |
| 5 to 7 days                                                             | 233               | 85.1       |
| Posted health post opening days                                         | 54                | 19.7       |
| Trained for integrated community case management of childhood illnesses | 216               | 78.8       |
| Received supportive supervision in the last six months                  | 216               | 78.8       |
| Participated in Performance Review and Clinical Mentorship meetings     | 126               | 46.0       |
| Used community forums to deliver maternal and child health education    | 205               | 74.8       |

### Health post preparedness to deliver sick child care services

The general service readiness of health posts (n=165) to deliver sick child health services was estimated at 62.8%. Half of the health posts had Rapid Diagnostic Test for malaria, and the mean availability of essential medicine was 66.9%. Relatively improved mean availability (80.1%) of tracer items was shown for basic equipment, while the lowest (48.7%) was for availability of standard precaution items. Very few health posts had all essential medicines and standard precaution equipment. Most of the health posts (84.2%) had vaccination cards (Figure 1).

Figure 1 Percentage of health posts (n=165) with drugs and supplies to deliver pneumonia-related and other sick child care services in four regions of Ethiopia, December 2018 to February 2019

### Awareness of treatment, actual care-seeking and utilisation of preventive immunisation

During the two weeks before the survey 704 (12.3%) of the children had any illnesses. Of these, 44 children had symptoms and signs of suspected pneumonia. Only one in five (23.9%) caregivers were aware of the

availability of pneumonia treatment services. Health care was sought for one-third (36.1%) of children with any illnesses and for 56.8% of children with suspected pneumonia. Almost half (49.3%) of children aged 12-23 months had received three doses of pentavalent vaccinations (Table 3).

Table 3 Childhood illness and care utilisation by child demographic characteristics in four regions of Ethiopia, December 2018 to February 2019

| Service utilisation                                            | Frequency | Percentage |
|----------------------------------------------------------------|-----------|------------|
| Children with any illnesses                                    |           |            |
| Yes                                                            | 704       | 12.3       |
| No                                                             | 5,021     | 87.7       |
| Child illnesses by sex (n=704)                                 |           |            |
| Male                                                           | 362       | 51.4       |
| Female                                                         | 342       | 48.6       |
| Childhood illnesses by age (n=704)                             |           |            |
| 2-11 Months                                                    | 121       | 17.2       |
| 12-23 Months                                                   | 147       | 20.9       |
| 24-35 Months                                                   | 152       | 21.6       |
| 36-59 Months                                                   | 284       | 40.3       |
| Child with suspected pneumonia                                 |           |            |
| Yes                                                            | 44        | 0.8        |
| No                                                             | 5,743     | 99.2       |
| Child with suspected pneumonia treated with antibiotics (n=44) |           |            |
| Yes                                                            | 17        | 38.6       |
| No                                                             | 27        | 61.4       |
| Full pentavalent vaccination by sex (n=489)                    |           |            |
| Male                                                           | 258       | 52.8       |
| Female                                                         | 231       | 47.2       |

### Association of health post readiness with awareness and utilisation of pneumonia care

The Intra Cluster Correlation Coefficient (ICC) indicated that the study outcomes, i.e., awareness of pneumonia treatment (ICC=0.29), care-seeking behaviour (ICC=0.16) and pentavalent vaccination (ICC=0.28) significantly varied with level of clusters. While checking for the household-level confounders, we found that none of the household, caregiver and child characteristics were associated with the outcomes and main exposure variables (P-value of <0.2), i.e., the five health post readiness indices. But regardless of the statistical screening criteria (P-value of <0.2), analyses were adjusted for maternal age, education and intervention-comparison variables.

Analyses tested the association of general health post readiness index with study outcomes were adjusted for all independent variables (shown in Table 5) in addition to mother's age, education and intervention-comparison variables. The adjusted multilevel analyses revealed that general health post readiness was not associated with mother's awareness of availability of pneumonia treatment [AOR= 0.9, 95% CI 0.7 to 1.1] and utilisation of pentavalent-3 immunisation [AOR= 1.2, 95% CI 0.8 to 1.6]. The general health post readiness was negatively associated with care-seeking for childhood illnesses [AOR= 0.6, 95% CI 0.4 to 0.8], Table 4.

Table 4 General health post readiness and caregiver's awareness, care-seeking and utilisation of pentavalent-3 immunisation in four regions of Ethiopia, December 2018 to February 2019

| Awareness and utilisation                 | General readiness         |                              |
|-------------------------------------------|---------------------------|------------------------------|
|                                           | Crude Odds Ratio (95% CI) | Adjusted Odds Ratio (95% CI) |
| Awareness of treatment service (N= 4,934) | 0.9 (0.7,1.1)             | 0.9 (0.7,1.1)                |
| Care seeking (N=613)                      | 0.7 (0.5,0.9)             | 0.6 (0.4,0.8)                |
| Pentavalent-3 (N=860)                     | 1.2 (0.9,1.6)             | 1.2 (0.8,1.6)                |

As illustrated in Table-5, none of the health post readiness indices were associated with mother's awareness of availability of pneumonia treatment and care seeking for childhood illnesses. Only availability of standard precaution equipment for infection prevention was positively associated with utilisation of pentavalent-3 immunisation [AOR= 4.5, 95% CI 1.6 to 12.8]. On the other hand, our analysis revealed that home visiting by the health extension workers was associated with higher odds of [AOR= 2.9, 95% CI 2.3 to 3.6] mother's awareness of availability of pneumonia treatment.

Table 5 Health post preparedness indices associated with caregiver’s awareness, care-seeking and utilisation of three doses of pentavalent vaccines in four regions of Ethiopia, December 2018 to February 2019

| Characteristics                                               | Awareness of treatment service (N= 4,934) |         |                           |                              | Care seeking (N=613) |                  |                           |                              | Pentavalent-3 (N=860) |                |                           |                              |
|---------------------------------------------------------------|-------------------------------------------|---------|---------------------------|------------------------------|----------------------|------------------|---------------------------|------------------------------|-----------------------|----------------|---------------------------|------------------------------|
|                                                               | Aware                                     | Unaware | Crude Odds Ratio (95% CI) | Adjusted Odds Ratio (95% CI) | Sought care          | Didn't seek care | Crude Odds Ratio (95% CI) | Adjusted Odds Ratio (95% CI) | Vaccinated            | Not vaccinated | Crude Odds Ratio (95% CI) | Adjusted Odds Ratio (95% CI) |
| <b>Basic amenities</b>                                        |                                           |         |                           |                              |                      |                  |                           |                              |                       |                |                           |                              |
| All not available                                             | 923                                       | 2,867   | 1.0                       | 1.0                          | 161                  | 270              | 1.0                       | 1.0                          | 325                   | 337            | 1.0                       | 1.0                          |
| All available                                                 | 256                                       | 888     | 0.9 (0.6,1.5)             | 0.9 (0.6,1.5)                | 49                   | 133              | 0.7 (0.4,1.1)             | 0.7 (0.4,1.2)                | 98                    | 100            | 0.9 (0.6,1.8)             | 0.9 (0.6,1.8)                |
| <b>Basic equipment</b>                                        |                                           |         |                           |                              |                      |                  |                           |                              |                       |                |                           |                              |
| All not available                                             | 590                                       | 2,021   | 1.0                       | 1.0                          | 117                  | 202              | 1.0                       | 1.0                          | 219                   | 224            | 1.0                       | 1.0                          |
| All available                                                 | 589                                       | 1,734   | 1.3 (0.9,1.9)             | 1.2 (0.8,1.9)                | 93                   | 201              | 0.8 (0.5,1.3)             | 0.9 (0.5,1.4)                | 204                   | 213            | 0.9 (0.6,1.6)             | 0.8 (0.5,1.4)                |
| <b>Standard precaution equipment for infection prevention</b> |                                           |         |                           |                              |                      |                  |                           |                              |                       |                |                           |                              |
| All not available                                             | 1,091                                     | 3,555   | 1.0                       | 1.0                          | 202                  | 379              | 1.0                       | 1.0                          | 386                   | 414            | 1.0                       | 1.0                          |
| All available                                                 | 88                                        | 200     | 1.9 (0.9,3.9)             | 1.9 (0.9,4.2)                | 8                    | 24               | 0.6 (0.2,1.7)             | 0.8 (0.3,2.1)                | 37                    | 23             | 2.3 (0.9,5.6)             | 4.5 (1.6,12.8)               |
| <b>Rapid diagnostic test for malaria</b>                      |                                           |         |                           |                              |                      |                  |                           |                              |                       |                |                           |                              |
| No available                                                  | 597                                       | 1,858   | 1.0                       | 1.0                          | NA                   | NA               | NA                        | NA                           | NA                    | NA             | NA                        | NA                           |
| Available                                                     | 582                                       | 1,897   | 0.8 (0.5,1.2)             | 0.7 (0.4,1.1)                | NA                   | NA               | NA                        | NA                           | NA                    | NA             | NA                        | NA                           |
| <b>Essential medicine</b>                                     |                                           |         |                           |                              |                      |                  |                           |                              |                       |                |                           |                              |
| First tercile                                                 | 354                                       | 1025    | 1.0                       | 1.0                          | 58                   | 98               | 1                         | 1                            | 108                   | 126            | 1.0                       | 1.0                          |
| Second tercile                                                | 396                                       | 1355    | 0.9 (0.5,1.4)             | 0.9 (0.5,1.4)                | 76                   | 142              | 0.8 (0.4,1.4)             | 0.8 (0.4,1.5)                | 129                   | 145            | 0.9 (0.5,1.8)             | 0.8 (0.4,1.6)                |
| Third tercile                                                 | 429                                       | 1375    | 0.8 (0.5,1.3)             | 0.8 (0.5,1.4)                | 76                   | 163              | 0.7 (0.4,1.3)             | 0.7 (0.4,1.4)                | 186                   | 166            | 1.3 (0.7,2.3)             | 1.1 (0.6,2.1)                |
| <b>Number of health extension workers per health post</b>     |                                           |         |                           |                              |                      |                  |                           |                              |                       |                |                           |                              |
| One                                                           | 226                                       | 784     | 1.0                       | 1.0                          | 47                   | 71               | 1.0                       | 1.0                          | 73                    | 68             | 1.0                       | 1.0                          |
| Two and above                                                 | 953                                       | 2,971   | 1.2 (0.7,1.9)             | 1.2 (0.7,1.9)                | 163                  | 332              | 0.8 (0.4,1.4)             | 0.8 (0.5,1.5)                | 350                   | 369            | 0.9 (0.5,1.6)             | 0.7 (0.4,1.4)                |
| <b>Number of health post opening days</b>                     |                                           |         |                           |                              |                      |                  |                           |                              |                       |                |                           |                              |
| Less than five days                                           | 209                                       | 582     | 1.0                       | 1.0                          | 43                   | 71               | 1.0                       | 1.0                          | 61                    | 67             | 1.0                       | 1.0                          |

|                                                                                             |     |       |                  |                          |     |     |                  |                  |     |     |                  |                  |
|---------------------------------------------------------------------------------------------|-----|-------|------------------|--------------------------|-----|-----|------------------|------------------|-----|-----|------------------|------------------|
| Five days and above                                                                         | 970 | 3,173 | 0.8<br>(0.5,1.3) | 0.7<br>(0.4,1.2)         | 167 | 332 | 0.9<br>(0.5,1.5) | 0.7<br>(0.4,1.4) | 362 | 370 | 1.3<br>(0.7,2.5) | 1.4<br>(0.7,2.8) |
| Health extension workers used community forum                                               |     |       |                  |                          |     |     |                  |                  |     |     |                  |                  |
| No                                                                                          | 297 | 1,003 | 1.0              | 1.0                      | 70  | 139 | 1.0              | 1.0              | 113 | 131 | 1.0              | 1.0              |
| Yes                                                                                         | 882 | 2,752 | 1.2<br>(0.8,1.8) | 1.3<br>(0.8,1.9)         | 140 | 264 | 1.0<br>(0.6,1.6) | 0.9<br>(0.6,1.5) | 310 | 306 | 1.3<br>(0.8,2.2) | 1.3<br>(0.7,2.2) |
| Health extension workers received supervision                                               |     |       |                  |                          |     |     |                  |                  |     |     |                  |                  |
| No                                                                                          | NA  | NA    | NA               | NA                       | 44  | 105 | 1.0              | 1.0              | 60  | 68  | 1.0              | 1.0              |
| Yes                                                                                         | NA  | NA    | NA               | NA                       | 166 | 298 | 1.3<br>(0.8,2.3) | 1.5<br>(0.8,2.6) | 363 | 369 | 1.4<br>(0.7,2.5) | 1.1<br>(0.5,2.2) |
| Health extension workers received iCCM training                                             |     |       |                  |                          |     |     |                  |                  |     |     |                  |                  |
| Did not received training                                                                   | NA  | NA    | NA               | NA                       | 40  | 74  | 1.0              | 1.0              | NA  | NA  | NA               | NA               |
| Received training                                                                           | NA  | NA    | NA               | NA                       | 170 | 329 | 0.9<br>(0.5,1.6) | 0.9<br>(0.5,1.7) | NA  | NA  | NA               | NA               |
| Health extension workers participated at Performance Review and Clinical Mentorship meeting |     |       |                  |                          |     |     |                  |                  |     |     |                  |                  |
| No                                                                                          | NA  | NA    | NA               | NA                       | 123 | 252 | 1.0              | 1.0              | 232 | 252 | 1.0              | 1.0              |
| Yes                                                                                         | NA  | NA    | NA               | NA                       | 87  | 151 | 1.2<br>(0.8,1.9) | 1.2<br>(0.7,2.0) | 191 | 185 | 1.2<br>(0.7,1.9) | 0.9<br>(0.5,1.5) |
| Home visting                                                                                |     |       |                  |                          |     |     |                  |                  |     |     |                  |                  |
| No                                                                                          | 934 | 3,445 | 1                | <b>1</b>                 | 175 | 357 | <b>1</b>         | 1                | 372 | 386 | 1.0              | 1.0              |
| Yes                                                                                         | 244 | 309   | 2.9<br>(2.4,3.7) | <b>2.9<br/>(2.3,3.6)</b> | 35  | 46  | 1.6<br>(0.9,2.6) | 1.5<br>(0.9,2.5) | 51  | 38  | 1.6<br>(0.9,2.7) | 1.6<br>(0.9,2.7) |



## DISCUSSION

Overall, this study showed insufficient health post service preparedness and low household awareness and utilisation of preventive and curative services for childhood suspected pneumonia. There was no consistent association between facility preparedness and utilisation of preventive and curative services.

### Strengths and limitations

With an attempt of narrowing the existing scarcity of evidence, our study examined the association between health post readiness and household level awareness and utilisation of pneumonia relevant health services in a wider geographic area. Readiness of health posts was measured using the standard WHO Health Service Availability and Readiness Assessment tool<sup>35</sup>. When vaccination cards were not available at home, children's pentavalent immunisation status was assessed through interviewing the caregivers. Likewise, ascertainment of childhood suspected pneumonia and other illnesses was based on the caregiver's two weeks reported symptoms prior to the survey. These ascertainment techniques have been used by the Demographic and Health Surveys, but might be influenced by recall bias<sup>28</sup>. Furthermore, we assessed health post service readiness and pneumonia service utilisation in selected, but representative, districts of four Ethiopian regions, therefore the findings may not be generalized to other geographic areas and health system levels.

### Health post preparedness

This study showed that two-thirds of the health posts were ready to provide sick child care, suggesting that the remaining significant proportion of facilities were not able to deliver such services. More or less similar level of structural preparedness of health posts or primary health care facilities for pneumonia and other sick child care were previously reported in Ethiopia and other low- and middle-income countries<sup>10</sup><sup>36</sup><sup>37</sup>. Furthermore, health posts or health centres of Ethiopia and other low-income countries were found with low readiness to provide quality care to sick children<sup>9</sup>. According to the Ethiopia health system, a health centre is structured to support and strengthen five health posts with their catchment areas, hence insufficient preparedness of the surveyed health posts could be explained by scarcity of supplies at health centres or poor linkages between health posts and health centres or the health system at large<sup>29</sup><sup>38</sup>.

Inadequate readiness of health posts in the study setting and other low-income countries indicates a serious challenge to community case management of pneumonia, particularly in the rural or unreached communities, where a majority of preventable deaths occur<sup>6</sup><sup>28</sup>. Most importantly, only a few of the

1  
2  
3 surveyed health posts had all essential medicines and just half had diagnostic equipment, clearly  
4 indicating their limitations in providing effective pneumonia or sick child treatment<sup>56</sup>. Scarcity of essential  
5 medicines in Ethiopia and other Sub-Saharan African countries results in missed pneumonia treatments  
6 at facility level<sup>13 17 29</sup>. Unavailability of rapid diagnostic tests impairs community health worker's ability to  
7 differentiate suspected pneumonia from malaria in case of symptom overlap, a common clinical problem  
8 in African children<sup>39-41</sup>.  
9

### 14 **Awareness and utilisation of pneumonia-related health services**

15  
16 Our study revealed low health care utilisation for pneumonia-specific preventive and curative services.  
17 These levels of service utilisation were lower compared to the reported regional pentavalent-3  
18 immunisation coverage (80%) and care seeking behaviour (85%) for childhood suspected pneumonia and  
19 other illnesses in Sub-Saharan African Countries<sup>42 43</sup>. Community awareness of illness and sick child care  
20 is a pre-requisite to seek timely health services<sup>44</sup>. We found that less than a fifth of caregivers were aware  
21 of the availability of pneumonia treatment services, and this might partly explain the observed poor  
22 utilisation of pneumonia-related health services in the study setting<sup>45 46</sup>. The reported low care utilisation  
23 could also be explained by inadequate readiness or service quality of the primary health care facilities for  
24 pneumonia-related preventive and treatment services<sup>36 47</sup>. The OHEP evaluation studies have revealed a  
25 low quality of sick child care services provided at the primary health care facilities, and caregivers of  
26 children have also mentioned this as a key barrier to seek care at health posts<sup>48-50</sup>. A study in 22 African  
27 countries noted a low level of community trust in public health facilities as an important reason to the low  
28 coverage of child vaccination<sup>51</sup>.  
29  
30  
31  
32  
33  
34  
35  
36  
37  
38

### 39 **Association between health post preparedness and utilisation of preventive immunisation and** 40 **care seeking behaviour**

41  
42 Earlier studies have shown a positive association between health facility readiness and utilisation of first-  
43 level sick child care<sup>11 21</sup>. We did not find any consistent pattern of relationship between facility readiness  
44 indices and utilisation of services. There was a positive association between the availability of standard  
45 precaution equipment for infection prevention and utilisation of pentavalent-3 immunisation. However,  
46 the general health post readiness had no association with awareness and coverage of pentavalent-3  
47 immunisation, but a negative association with care-seeking for childhood suspected pneumonia and other  
48 illnesses. Another national study also showed absence of association between readiness of primary health  
49 care facilities for sick child care and caregivers' satisfaction to the respective services<sup>52</sup>. The lack of  
50  
51  
52  
53  
54  
55  
56  
57

1  
2  
3 consistent positive association between service readiness and use of services may be linked to the  
4 dominating low level of facility preparedness. In spite of this, equipping health care facilities with relevant  
5 equipment is a prerequisite to enhance the quality of iCCM services <sup>6</sup>. Hence, the reported lack of  
6 association of health post readiness with awareness and utilisation of pneumonia treatment services  
7 suggests that simply equipping facilities with necessary supplies is not a guarantee to reach the intended  
8 level of community awareness and utilisation of health services. Health facility strengthening efforts,  
9 therefore, should go along with implementation of awareness creation and demand generation  
10 interventions to increase the community awareness, trust and utilisation of pneumonia-related and other  
11 child health services <sup>44</sup>. In line with this notion, our study revealed that home visiting by the health  
12 extension workers was positively associated with caregivers' awareness of pneumonia treatment. Home  
13 visiting by the community health workers is one of the vital strategies to promote child health and  
14 enhance awareness and utilisation of health services <sup>44 53</sup>. A sub-study of the same project also showed  
15 that awareness creation and delivery of preventive child health interventions (such as immunisations)  
16 were the main components of outreach services delivered by the health extension workers <sup>48</sup>.

### 27 **Relation of findings with already published OHEP evaluation studies**

28  
29  
30 This study was part of the end line evaluation of the OHEP intervention. The findings showed sizable gaps  
31 in structural readiness of health posts for sick child care. Results of our published baseline study also  
32 illustrated the scarcity of essential drugs and other supplies at the health posts <sup>29</sup>. Sub-studies of the same  
33 project investigated process aspects of quality of sick child care, and results showed low clinical  
34 performance of the health extension workers to identify and treat childhood suspected pneumonia and  
35 other illnesses <sup>49 50</sup>. A qualitative study noted a lack of caregiver's trust in the health extension workers'  
36 clinical competency to manage sick children and a low availability of essential drugs, diagnostic and other  
37 supplies at health posts. The low quality of sick child care at health posts was a barrier to utilise the  
38 services <sup>48</sup>.

### 46 **CONCLUSIONS**

47  
48 This study has shown a low health post readiness for services, and low household awareness and  
49 utilisation of pneumonia-relevant preventive and curative services. Parent's awareness and utilisation of  
50 pneumonia-specific preventive and curative services were not consistently associated with the health post  
51 readiness. These findings underline the pivotal role of strengthening the availability and quality of  
52 pneumonia and sick child care services at the health posts. There is a need to simultaneously equip  
53  
54  
55  
56  
57

1  
2  
3 facilities and intensify the community awareness creation and demand generation efforts to improve  
4 utilisation of essential child health services.  
5  
6

## 7 8 9 10 11 12 13 14 15 16 17 18 19 20 21 22 23 24 25 26 27 28 29 30 31 32 33 34 35 36 37 38 39 40 41 42 43 44 45 46 47 48 49 50 51 52 53 54 55 56 57 58 59 60

### References

1. Liu L, Johnson HL, Cousens S, et al. Global, regional, and national causes of child mortality: an updated systematic analysis for 2010 with time trends since 2000. *The Lancet* 2012;**379**(9832):2151-61.
2. United Nations Inter-agency Group for Child Mortality Estimation (UN IGME), 'Levels & Trends in Child Mortality: Report 2020, Estimates developed by the United Nations Inter-agency Group for Child Mortality Estimation', United Nations Children's Fund, New York, 2020.
3. McAllister DA, Liu L, Shi T, et al. Global, regional, and national estimates of pneumonia morbidity and mortality in children younger than 5 years between 2000 and 2015: a systematic analysis. *The Lancet Global Health* 2019;**7**(1):e47-e57.
4. Bhutta ZA, Das JK, Walker N, et al. Interventions to address deaths from childhood pneumonia and diarrhoea equitably: what works and at what cost? *The Lancet* 2013;**381**(9875):1417-29.
5. World Health Organization. *Management of pneumonia in community settings*: World Health Organization, Department of Child and Adolescent Health and ..., 2004.
6. World Health Organization. WHO/UNICEF joint statement integrated community case management (iCCM): an equity-focused strategy to improve access to essential treatment services for children. Geneva and New York 2012.
7. Geldsetzer P, Williams TC, Kirolos A, et al. The recognition of and care seeking behaviour for childhood illness in developing countries: a systematic review. *PloS one* 2014;**9**(4):e93427.
8. Adedokun ST, Yaya S. Factors influencing mothers' health care seeking behaviour for their children: evidence from 31 countries in sub-Saharan Africa. *BMC Health Services Research* 2020;**20**:842.
9. Macarayan EK, Gage AD, Doubova SV, et al. Assessment of quality of primary care with facility surveys: a descriptive analysis in ten low-income and middle-income countries. *The Lancet Global Health* 2018;**6**(11):e1176-e85.
10. Acharya K B, J, and Tuladhar S. Client Satisfaction and Quality of Curative Services for Sick Children in Nepal. DHS Further Analysis Reports No. 114. Rockville, Maryland, USA: ICF. 2018.
11. Liu L, Leslie HH, Joshua M, et al. Exploring the association between sick child healthcare utilisation and health facility quality in Malawi: a cross-sectional study. *BMJ open* 2019;**9**(7):e029631.
12. Shawon MSR, Adhikary G, Ali MW, et al. General service and child immunization-specific readiness assessment of healthcare facilities in two selected divisions in Bangladesh. *BMC health services research* 2018;**18**(1):39.
13. Taylor C, Linn A, Wang W, et al. Examination of malaria service utilization and service provision: an analysis of DHS and SPA data from Malawi, Senegal, and Tanzania. *Malaria journal* 2019;**18**(1):258.
14. Blanas DA, Ndiaye Y, Nichols K, et al. Barriers to community case management of malaria in Saraya, Senegal: training, and supply-chains. *Malaria journal* 2013;**12**(1):95.
15. Masters SH, Burstein R, DeCenso B, et al. Pharmaceutical availability across levels of care: evidence from facility surveys in Ghana, Kenya, and Uganda. *PloS one* 2014;**9**(12):e114762.
16. Ssempiira J, Kasirye I, Kissa J, et al. Measuring health facility readiness and its effects on severe malaria outcomes in Uganda. *Scientific Reports* 2018.
17. Bagonza J, Rutebemberwa E, Eckmanns T, et al. What influences availability of medicines for the community management of childhood illnesses in central Uganda? Implications for scaling up the integrated community case management programme. *BMC Public Health* 2015;**15**(1):1-8.
18. International EPHIEFMoHI. Ethiopia Service Provision Assessment Plus Survey. 2014.

19. Shaw B, Amouzou A, Miller NP, et al. Determinants of utilization of health extension workers in the context of scale-up of integrated community case management of childhood illnesses in Ethiopia. *The American journal of tropical medicine and hygiene* 2015;**93**(3):636-47.
20. Anselmi L, Lagarde M, Hanson K. Health service availability and health seeking behaviour in resource poor settings: evidence from Mozambique. *Health Economics Review* (2015) 5:26
21. Kuwawenaruwa A, Wyss K, Wiedenmayer K, et al. The effects of medicines availability and stock-outs on household's utilization of healthcare services in Dodoma region, Tanzania. *Health policy and planning* 2020;**35**(3):323-33.
22. Kok MC, Kea AZ, Datiko DG, et al. A qualitative assessment of health extension workers' relationships with the community and health sector in Ethiopia: opportunities for enhancing maternal health performance. *Human resources for health* 2015;**13**(1):80.
23. Befekadu A, Yitayal M. Knowledge and practice of health extension workers on drug provision for childhood illness in west Gojjam, Amhara, Northwest Ethiopia. *BMC Public Health* 2020;**20**:1-10.
24. Miller NP, Amouzou A, Tafesse M, et al. Integrated community case management of childhood illness in Ethiopia: implementation strength and quality of care. *The American journal of tropical medicine and hygiene* 2014;**91**(2):424-34.
25. Tilahun H, Fekadu B, Abdisa H, et al. Ethiopia's health extension workers use of work time on duty: time and motion study. *Health policy and planning* 2017;**32**(3):320-28.
26. Datiko DG, Bunte EM, Birrie GB, et al. Community participation and maternal health service utilization: lessons from the health extension programme in rural southern Ethiopia. *Journal of Global Health Reports* 2019;**3**.
27. Mangham-Jefferies L, Mathewos B, Russell J, et al. How do health extension workers in Ethiopia allocate their time? *Human resources for health* 2014;**12**(1):61.
28. Central Statistical Agency [Ethiopia] and ICF International. Ethiopia Demographic and Health Survey 2016. Addis Ababa, Ethiopia and Calverton, Maryland, USA: Central Statistical Agency and ICF International. 2017.
29. Tariku A, Okwaraji YB, Worku A, et al. Prevention and treatment of suspected pneumonia in Ethiopian under-five children from household to primary care. *Acta Paediatrica* 2020.
30. Berhanu A, Alemayehu M, Kassa Daka WB, et al. Utilization of Integrated Community Case Management of Childhood Illnesses at Health Posts in Southern Ethiopia. *Pediatric Health, Medicine and Therapeutics* 2020;**11**:459.
31. Ethiopian Public Health Institute: World Health Organization. Ethiopia Service Availability and Readiness Assessment 2016 Summary Report. 2016.
32. Deribew A, Tessema GA, Deribe K, et al. Trends, causes, and risk factors of mortality among children under 5 in Ethiopia, 1990–2013: findings from the Global Burden of Disease Study 2013. *Population health metrics* 2016;**14**(1):42.
33. Berhanu D, Okwaraji YB, Belayneh AB, et al. Protocol for the evaluation of a complex intervention aiming at increased utilisation of primary child health services in Ethiopia: a before and after study in intervention and comparison areas. *BMC Health Services Research* 2020;**20**:1-12.
34. Berhanu D, Okwaraji YB, Defar A, et al. Does a complex intervention targeting communities, health facilities and district health managers increase the utilisation of community-based child health services? A before and after study in intervention and comparison areas of Ethiopia. *BMJ open* 2020;**10**(9):e040868.
35. Organization WH. Service availability and readiness assessment (SARA): an annual monitoring system for service delivery: reference manual: World Health Organization, 2013.
36. Hailemariam S, Gebeyehu Y, Loha E, et al. Inadequate management of pneumonia among children in South Ethiopia: findings from descriptive study. *BMC health services research* 2019;**19**(1):426.

- 1  
2  
3  
4  
5  
6  
7  
8  
9  
10  
11  
12  
13  
14  
15  
16  
17  
18  
19  
20  
21  
22  
23  
24  
25  
26  
27  
28  
29  
30  
31  
32  
33  
34  
35  
36  
37  
38  
39  
40  
41  
42  
43  
44  
45  
46  
47  
48  
49  
50  
51  
52  
53  
54  
55  
56  
57
37. Gage AD, Leslie HH, Bitton A, et al. Does quality influence utilization of primary health care? Evidence from Haiti. *Globalization and health* 2018;**14**(1):1-9.
  38. Sousa Ad, Tiedje KE, Recht J, et al. Community case management of childhood illnesses: policy and implementation in Countdown to 2015 countries. *Bull World Health Organ* 2012;**90**:183–190.
  39. Ukwaja KN, Aina OB, Talabi AA. Clinical overlap between malaria and pneumonia: can malaria rapid diagnostic test play a role? *The Journal of Infection in Developing Countries* 2011;**5**(03):199-203.
  40. Kyabayinze DJ, Asiimwe C, Nakanjako D, et al. Use of RDTs to improve malaria diagnosis and fever case management at primary health care facilities in Uganda. *Malaria journal* 2010;**9**(1):1-10.
  41. Yeboah-Antwi K, Pilingana P, Macleod WB, et al. Community case management of fever due to malaria and pneumonia in children under five in Zambia: a cluster randomized controlled trial. *PLoS Med* 2010;**7**(9):e1000340.
  42. Ahinkorah BO, Budu E, Seidu A-A, et al. Barriers to healthcare access and healthcare seeking for childhood illnesses among childbearing women in sub-Saharan Africa: A multilevel modelling of Demographic and Health Surveys. *PLoS ONE* 16(2): e0244395 2021.
  43. Fenta SM, Biresaw HB, Fentaw KD, et al. Determinants of full childhood immunization among children aged 12– 23 months in sub-Saharan Africa: a multilevel analysis using Demographic and Health Survey Data. *Tropical Medicine and Health* (2021) 49:29.
  44. Miller NP, Bagheri Ardestani F, Wong H, et al. Barriers to the utilization of community-based child and newborn health services in Ethiopia: a scoping review. *Health Policy and Planning* 2021.
  45. Sadruddin S, Khan IuH, Bari A, et al. Effect of community mobilization on appropriate care seeking for pneumonia in Haripur, Pakistan. *Journal of Global Health* 2015;**5** (1).
  46. Noordam AC, Sharkey AB, Hinssen P, et al. Association between caregivers' knowledge and care seeking behaviour for children with symptoms of pneumonia in six sub-Saharan African Countries. *BMC Health Services Research* (2017) 17:107
  47. Tadesse T, Gelaw B, Haile Y, et al. Immunization service availability and readiness in primary health care in pastoral and semi-pastoral CGPP Ethiopia implementation districts. *Ethiopian Journal of Health Development* 2019;**33**.
  48. Defar A, Alemu K, Tigabu Z, et al. Caregivers' and Health Extension Workers' Perceptions and Experiences of Outreach Management of Childhood Illnesses in Ethiopia: A Qualitative Study. *International journal of environmental research and public health* 2021;**18**(7):3816.
  49. Daka DW, Wordofa MA, Woldie M, et al. Quality of clinical assessment and management of sick children by Health Extension Workers in four regions of Ethiopia: A cross-sectional survey. *PLoS ONE* 2020;**15**(9): e0239361.
  50. Getachew T, Mekonnen S, Yitayal M, et al. Health Extension Workers' diagnostic accuracy for common childhood illnesses in four regions of Ethiopia: a cross-sectional study. *Acta Pædiatrica* 2019.
  51. Stoop N, Hirvonen K, Maystadt J-F. Institutional mistrust and child vaccination coverage in Africa. *BMJ Global Health* 2021;6:e004595 doi:10.1136/bmjgh-2020-004595.
  52. Getachew T, Abebe SM, Yitayal M, et al. Assessing the quality of care in sick child services at health facilities in Ethiopia. *BMC Health Services Research* 2020;**20**(1):1-12.
  53. Tripathi A, Kabra S, Sachdev H, et al. Home visits by community health workers to improve identification of serious illness and care seeking in newborns and young infants from low-and middle-income countries. *Journal of Perinatology* 2016;**36**(1):S74-S82.

## Acknowledgements

We would like to forward our deepest gratitude to the study participants. Our special thanks to field assistants involved in the data collection process.

## Contributors

AT, LÅP, YB, YO, AW and GAB contributed to the conceptualization of the study. AT analysed and interpreted the data and drafted the manuscript. LÅP, YB, YO, AW and GAB contributed to analysis and writing of the paper. All authors have read and approved the final manuscript.

## Funding

The study was funded by a grant from the Bill and Melinda Gates Foundation (grant INV-009691) to the London School of Hygiene & Tropical Medicine. The funder had no role in data collection, analysis, or interpretation of results.

## Competing interests

The authors declare that they have no conflict of interest.

## Patient consent for publication

Not applicable

## Ethics approval

The original study was approved by the Ethical Review Boards of the Ethiopian Public Health Institute (protocol number SERO-012-8-2016), the London School of Hygiene & Tropical Medicine (protocol number 11235), and the University of Gondar (V/P/RCS/05/559/2019). A written informed consent was obtained from each household respondent, caregiver of the index child and the health workers.

## Provenance and peer review

Not commissioned; externally peer reviewed.

## Data availability statement

1  
2  
3 The data for this manuscript were primarily collected by the Ethiopian Public Health Institute and London  
4 School of Hygiene & Tropical Medicine. Interested researchers may contact the focal person, Dr Yemisrach  
5 B. Okwaraji through email: Yemisrach.Okwaraji@lshtm.ac.uk. All requests will be reviewed by this  
6 committee and if granted, data will be shared without any identifiers.  
7  
8  
9

### 10 **Figure legend**

11  
12  
13 Figure 1 Percentage of health posts (n=165) with drugs and supplies to deliver pneumonia-related and  
14 other sick child care services in four regions of Ethiopia, December 2018 to February 2019  
15  
16  
17  
18  
19  
20  
21  
22  
23  
24  
25  
26  
27  
28  
29  
30  
31  
32  
33  
34  
35  
36  
37  
38  
39  
40  
41  
42  
43  
44  
45  
46  
47  
48  
49  
50  
51  
52  
53  
54  
55  
56  
57



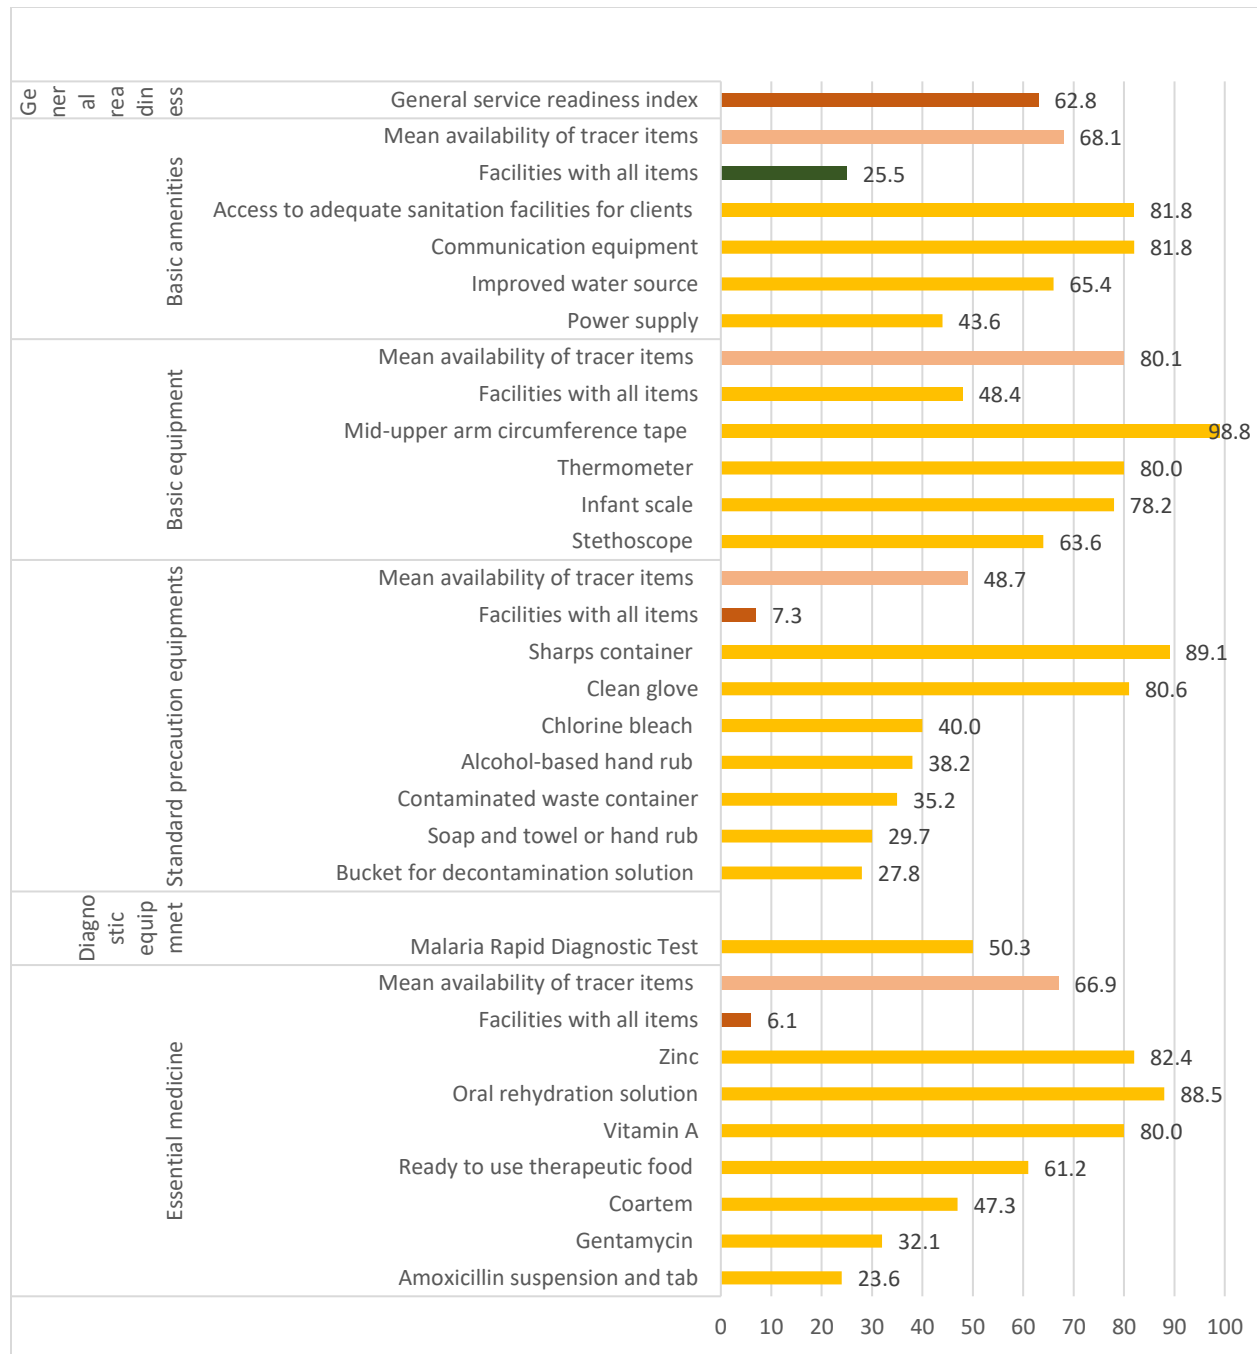

Figure 1 Percentage of health posts (n=165) with drugs and supplies to deliver pneumonia-related and other sick child care services in four regions of Ethiopia, December 2018 to February 2019

**STROBE 2007 (v4) Statement—Checklist of items that should be included in reports of *cross-sectional studies***

| Section/Topic                | Item # | Recommendation                                                                                                                                                                       | Reported on page # |
|------------------------------|--------|--------------------------------------------------------------------------------------------------------------------------------------------------------------------------------------|--------------------|
| <b>Title and abstract</b>    | 1      | (a) Indicate the study's design with a commonly used term in the title or the abstract                                                                                               | 1                  |
|                              |        | (b) Provide in the abstract an informative and balanced summary of what was done and what was found                                                                                  | 2                  |
| <b>Introduction</b>          |        |                                                                                                                                                                                      |                    |
| Background/rationale         | 2      | Explain the scientific background and rationale for the investigation being reported                                                                                                 | 3-4                |
| Objectives                   | 3      | State specific objectives, including any prespecified hypotheses                                                                                                                     | 4                  |
| <b>Methods</b>               |        |                                                                                                                                                                                      |                    |
| Study design                 | 4      | Present key elements of study design early in the paper                                                                                                                              | 5                  |
| Setting                      | 5      | Describe the setting, locations, and relevant dates, including periods of recruitment, exposure, follow-up, and data collection                                                      | 4-5                |
| Participants                 | 6      | (a) Give the eligibility criteria, and the sources and methods of selection of participants                                                                                          | 5                  |
| Variables                    | 7      | Clearly define all outcomes, exposures, predictors, potential confounders, and effect modifiers. Give diagnostic criteria, if applicable                                             | 6-7                |
| Data sources/<br>measurement | 8*     | For each variable of interest, give sources of data and details of methods of assessment (measurement). Describe comparability of assessment methods if there is more than one group | 6-7                |
| Bias                         | 9      | Describe any efforts to address potential sources of bias                                                                                                                            | 6-7                |
| Study size                   | 10     | Explain how the study size was arrived at                                                                                                                                            | 5                  |
| Quantitative variables       | 11     | Explain how quantitative variables were handled in the analyses. If applicable, describe which groupings were chosen and why                                                         | 6-7                |
| Statistical methods          | 12     | (a) Describe all statistical methods, including those used to control for confounding                                                                                                | 7                  |
|                              |        | (b) Describe any methods used to examine subgroups and interactions                                                                                                                  | 7                  |
|                              |        | (c) Explain how missing data were addressed                                                                                                                                          | 7                  |
|                              |        | (d) If applicable, describe analytical methods taking account of sampling strategy                                                                                                   | 7                  |
|                              |        | (e) Describe any sensitivity analyses                                                                                                                                                | -                  |
| <b>Results</b>               |        |                                                                                                                                                                                      |                    |

|                          |     |                                                                                                                                                                                                              |               |
|--------------------------|-----|--------------------------------------------------------------------------------------------------------------------------------------------------------------------------------------------------------------|---------------|
| Participants             | 13* | (a) Report numbers of individuals at each stage of study—eg numbers potentially eligible, examined for eligibility, confirmed eligible, included in the study, completing follow-up, and analysed            | 8             |
|                          |     | (b) Give reasons for non-participation at each stage                                                                                                                                                         | -             |
|                          |     | (c) Consider use of a flow diagram                                                                                                                                                                           | -             |
| Descriptive data         | 14* | (a) Give characteristics of study participants (eg demographic, clinical, social) and information on exposures and potential confounders                                                                     | 8-9           |
|                          |     | (b) Indicate number of participants with missing data for each variable of interest                                                                                                                          | 8, 11, 13, 14 |
| Outcome data             | 15* | Report numbers of outcome events or summary measures                                                                                                                                                         | 11            |
| Main results             | 16  | (a) Give unadjusted estimates and, if applicable, confounder-adjusted estimates and their precision (eg, 95% confidence interval). Make clear which confounders were adjusted for and why they were included | 13-14         |
|                          |     | (b) Report category boundaries when continuous variables were categorized                                                                                                                                    | 9             |
|                          |     | (c) If relevant, consider translating estimates of relative risk into absolute risk for a meaningful time period                                                                                             | N/A           |
| Other analyses           | 17  | Report other analyses done—eg analyses of subgroups and interactions, and sensitivity analyses                                                                                                               | 12            |
| <b>Discussion</b>        |     |                                                                                                                                                                                                              |               |
| Key results              | 18  | Summarise key results with reference to study objectives                                                                                                                                                     | 15            |
| Limitations              | 19  | Discuss limitations of the study, taking into account sources of potential bias or imprecision. Discuss both direction and magnitude of any potential bias                                                   | 15            |
| Interpretation           | 20  | Give a cautious overall interpretation of results considering objectives, limitations, multiplicity of analyses, results from similar studies, and other relevant evidence                                   | 15 - 17       |
| Generalisability         | 21  | Discuss the generalisability (external validity) of the study results                                                                                                                                        | 15            |
| <b>Other information</b> |     |                                                                                                                                                                                                              |               |
| Funding                  | 22  | Give the source of funding and the role of the funders for the present study and, if applicable, for the original study on which the present article is based                                                | 18            |

\*Give information separately for cases and controls in case-control studies and, if applicable, for exposed and unexposed groups in cohort and cross-sectional studies.

**Note:** An Explanation and Elaboration article discusses each checklist item and gives methodological background and published examples of transparent reporting. The STROBE checklist is best used in conjunction with this article (freely available on the Web sites of PLoS Medicine at <http://www.plosmedicine.org/>, Annals of Internal Medicine at <http://www.annals.org/>, and Epidemiology at <http://www.epidem.com/>). Information on the STROBE Initiative is available at [www.strobe-statement.org](http://www.strobe-statement.org).

# BMJ Open

## Health post service readiness and use of preventive and curative services for suspected childhood pneumonia in Ethiopia: a cross-sectional study

|                                 |                                                                                                                                                                                                                                                                                                                                                                                                                                                                                                       |
|---------------------------------|-------------------------------------------------------------------------------------------------------------------------------------------------------------------------------------------------------------------------------------------------------------------------------------------------------------------------------------------------------------------------------------------------------------------------------------------------------------------------------------------------------|
| Journal:                        | <i>BMJ Open</i>                                                                                                                                                                                                                                                                                                                                                                                                                                                                                       |
| Manuscript ID                   | bmjopen-2021-058055.R1                                                                                                                                                                                                                                                                                                                                                                                                                                                                                |
| Article Type:                   | Original research                                                                                                                                                                                                                                                                                                                                                                                                                                                                                     |
| Date Submitted by the Author:   | 10-Mar-2022                                                                                                                                                                                                                                                                                                                                                                                                                                                                                           |
| Complete List of Authors:       | Tariku, Amare; University of Gondar, Human Nutrition; Berhane, Yemane; Addis Continental Institute of Public Health, Worku, Alemayehu; Addis Ababa University, School of Public Health Biks, Gashaw ; University of Gondar, Public Health ; University of Gondar College of Medicine and Health Sciences, Persson, Lars; London School of Hygiene and Tropical Medicine, Okwaraji, Yemisrach; London School of Hygiene & Tropical Medicine, Epidemiology and Population Health; 74B Beaconfield Road, |
| <b>Primary Subject Heading</b>: | Health services research                                                                                                                                                                                                                                                                                                                                                                                                                                                                              |
| Secondary Subject Heading:      | Infectious diseases                                                                                                                                                                                                                                                                                                                                                                                                                                                                                   |
| Keywords:                       | Public health < INFECTIOUS DISEASES, Community child health < PAEDIATRICS, Respiratory infections < THORACIC MEDICINE, Health policy < HEALTH SERVICES ADMINISTRATION & MANAGEMENT                                                                                                                                                                                                                                                                                                                    |
|                                 |                                                                                                                                                                                                                                                                                                                                                                                                                                                                                                       |

SCHOLARONE™  
Manuscripts



I, the Submitting Author has the right to grant and does grant on behalf of all authors of the Work (as defined in the below author licence), an exclusive licence and/or a non-exclusive licence for contributions from authors who are: i) UK Crown employees; ii) where BMJ has agreed a CC-BY licence shall apply, and/or iii) in accordance with the terms applicable for US Federal Government officers or employees acting as part of their official duties; on a worldwide, perpetual, irrevocable, royalty-free basis to BMJ Publishing Group Ltd ("BMJ") its licensees and where the relevant Journal is co-owned by BMJ to the co-owners of the Journal, to publish the Work in this journal and any other BMJ products and to exploit all rights, as set out in our [licence](#).

The Submitting Author accepts and understands that any supply made under these terms is made by BMJ to the Submitting Author unless you are acting as an employee on behalf of your employer or a postgraduate student of an affiliated institution which is paying any applicable article publishing charge ("APC") for Open Access articles. Where the Submitting Author wishes to make the Work available on an Open Access basis (and intends to pay the relevant APC), the terms of reuse of such Open Access shall be governed by a Creative Commons licence – details of these licences and which [Creative Commons](#) licence will apply to this Work are set out in our licence referred to above.

Other than as permitted in any relevant BMJ Author's Self Archiving Policies, I confirm this Work has not been accepted for publication elsewhere, is not being considered for publication elsewhere and does not duplicate material already published. I confirm all authors consent to publication of this Work and authorise the granting of this licence.

# Health post service readiness and use of preventive and curative services for suspected childhood pneumonia in Ethiopia: a cross-sectional study

Amare Tariku<sup>1,2\*</sup>, Yemane Berhane<sup>2</sup>, Alemayehu Worku<sup>2,3</sup>, Gashaw Andargie Biks<sup>4</sup>, Lars Åke Persson<sup>5,6</sup>, Yemisrach B. Okwaraji<sup>5,6</sup>

<sup>1</sup>Department of Human Nutrition, Institute of Public Health, College of Medicine and Health Sciences, University of Gondar, Gondar, Ethiopia

<sup>2</sup>Department of Epidemiology and Biostatistics and Department of Reproductive Health and Population, Addis Continental Institute of Public Health, Addis Ababa, Ethiopia

<sup>3</sup>School of Public Health, Addis Ababa University, Addis Ababa, Ethiopia

<sup>4</sup>Department of Health System and Policy, Institute of Public Health, College of Medicine and Health Sciences, University of Gondar, Gondar, Ethiopia

<sup>5</sup>London School of Hygiene & Tropical Medicine, London, UK

<sup>6</sup>Ethiopian Public Health Institute, Addis Ababa, Ethiopia

## Co-authors;

Yemane Berhane, MD, PhD: [yemaneberhane@addiscontinental.edu.et](mailto:yemaneberhane@addiscontinental.edu.et)

Alemayehu Worku, PhD: [alemayehuwy@yahoo.com](mailto:alemayehuwy@yahoo.com)

Gashaw Andargie Biks, PhD: [gashawab@gmail.com](mailto:gashawab@gmail.com)

Lars Åke Persson, MD, PhD: [Lars.Persson@lshtm.ac.uk](mailto:Lars.Persson@lshtm.ac.uk)

Yemisrach B. Okwaraji, PhD: [yemisrach.okwaraji@lshtm.ac.uk](mailto:yemisrach.okwaraji@lshtm.ac.uk)

## \*Corresponding author:

Amare Tariku, MSc; [amaretariku15@yahoo.com](mailto:amaretariku15@yahoo.com)

1  
2  
3 30 **ABSTRACT**  
4

5 31 **Objective:** Pneumonia is the single leading cause of infectious disease deaths in children under-five.  
6  
7 32 Despite this challenge, the utilization of preventive and curative child health services remains low in  
8  
9 33 Ethiopia. We investigated the association between health post service readiness and caregivers'  
10  
11 34 awareness of pneumonia services, care-seeking, and utilisation of pneumonia-relevant immunisation in  
12  
13 35 four Ethiopian regions.

14  
15 36 **Design and setting:** This cross-sectional study was conducted in 52 districts of four regions of Ethiopia  
16  
17 37 from December 2018 to February 2019. The health posts preparedness for sick child care was assessed  
18  
19 38 using the World Health Organization Health Service Availability and Readiness Assessment tool. Multilevel  
20  
21 39 analyses were employed to examine the associations between health post readiness and household level  
22  
23 40 awareness and utilisation of services.

24 41 **Participants:** We included 165 health posts, 274 health extension workers (community health workers),  
25  
26 42 and 4,729 caregivers with 5,787 children 2-59 months.

27  
28 43 **Outcome measures:** Awareness of pneumonia treatment, care-seeking behaviour, and coverage of  
29  
30 44 pentavalent-3 immunisation.

31  
32 45 **Results:** Only 62.8% of health posts were ready to provide sick child care services. One-quarter of  
33  
34 46 caregivers were aware of pneumonia services, and 56.8% sought an appropriate care provider for  
35  
36 47 suspected pneumonia. Nearly half (49.3%) of children (12-23 months) had received pentavalent-3  
37  
38 48 immunisation. General health post readiness was not associated with caregivers' awareness of  
39  
40 49 pneumonia treatment [AOR= 0.9, 95% CI 0.7 to 1.1] and utilisation of pentavalent-3 immunisation [AOR=  
41  
42 50 1.2, 95% CI 0.8 to 1.6], but negatively associated with care-seeking for childhood illnesses [AOR= 0.6, 95%  
43  
44 51 CI 0.4 to 0.8].

45 52 **Conclusion:** We found no association between facility readiness and awareness or utilisation of child  
46  
47 53 health services. There were significant deficiencies in health post preparedness for services. Caregivers  
48  
49 54 had low awareness and utilisation of pneumonia-related services. The results underline the importance  
50  
51 55 of enhancing facility preparedness, providing high-quality care, and intensifying demand generation  
52  
53 56 efforts to prevent and treat pneumonia.

54 57 **Keywords:** Childhood pneumonia; Health post preparedness; Health care utilisation; Ethiopia  
55  
56  
57

## 58 **Strengths and limitations of this study**

- 59 ■ This is the first study, which assessed the association between first-level healthcare facility readiness  
60 for services and caregivers' awareness and utilisation of pneumonia-relevant preventive and curative  
61 services in four of the most populous Ethiopian regions.
- 62 ■ Facility preparedness was assessed using the World Health Organization Health Service Availability  
63 and Readiness Assessment tool to generate objective and reliable information that is comparable  
64 across or within countries.
- 65 ■ We ascertained information on the utilisation of pneumonia-related preventive and curative  
66 services with Demographic and Health Surveys methods, assumed to reduce recall bias.
- 67 ■ The study covered pneumonia services and service readiness of health posts in 52 districts of four  
68 Ethiopian regions and findings may not be representative of other geographic areas and health  
69 system levels.

## 70 **INTRODUCTION**

71 Worldwide, pneumonia is responsible for one-fifth of all under-five deaths <sup>1</sup>. Nearly half (49%) of these  
72 deaths occur in four low- and middle-income countries, including Ethiopia <sup>2 3</sup>. There are effective  
73 preventive measures, including immunisation and antibiotics that can prevent or treat most cases of  
74 pneumonia. Despite these resources, children in low-income countries continue to suffer and die from  
75 pneumonia due to lack of access to or availability of these services <sup>4</sup>.

76 The World Health Organization and UNICEF introduced the integrated Community Case Management  
77 (iCCM) strategy in 2004 to increase access and quality of services for childhood pneumonia, diarrhea, and  
78 malaria. Effective implementation of this strategy requires uninterrupted stock of drugs and supplies,  
79 trained community health workers, and community awareness of these services <sup>5 6</sup>. Nevertheless, studies  
80 in low-income countries reveal that less than a fifth of sick children were brought to relevant health  
81 services for suspected pneumonia <sup>7 8</sup>. This low level of care-seeking has, among other things, been  
82 attributed to the poor quality of health services <sup>9</sup>. A majority of facilities in these settings have reportedly  
83 not had essential drugs, supplies and trained community health workers <sup>10-13</sup>. The general service  
84 readiness index for sick child care has varied between 19% and 69% in reports from Sub-Saharan African  
85 countries <sup>11 13</sup>. The readiness has been lower in rural areas and at the lowest primary healthcare level <sup>14-</sup>  
86 <sup>17</sup>. In Ethiopia, earlier reports have shown a lack of iCCM drugs and supplies at health posts <sup>9 18</sup>.



1  
2  
3 87 Inadequate preparedness and low service quality at the primary healthcare level reduce parents' trust  
4  
5 88 and utilisation of health services<sup>11 19-21</sup>. In Ethiopia, the low utilisation of iCCM services was also attributed  
6  
7 89 to absent supervision and refresher training of health extension workers<sup>22-27</sup>. We have earlier shown that  
8  
9 90 a substantial proportion of caregivers were not aware of pneumonia-related health services and,  
10  
11 91 therefore, less likely to seek care when their children got sick or get their children immunised<sup>28 29</sup>. The  
12  
13 92 low utilisation of iCCM services has also been attributed to the lack of readiness of health posts to care  
14  
15 93 for sick children<sup>19 30 31</sup>. Thus, there are reasons to investigate the primary-level health facility preparedness  
16  
17 94 to provide child health services and whether this is associated with the coverage of pneumonia-related  
18  
19 95 preventive and treatment services. In Ethiopia, under-five mortality was reported to be 55 per 1000 live  
20  
21 96 births in the 2019 Demographic and Health Survey. Although reduced in recent decades, the persistently  
22  
23 97 high level and continued pneumonia deaths call for intensified efforts to prevent these preventable  
24  
25 98 deaths<sup>28 32</sup>. The Ethiopian Ministry of Health in collaboration with non-governmental organisations  
26  
27 99 implemented a complex community-based intervention labelled Optimizing the Health Extension Program  
28  
29 100 (OHEP) in four of the most populous regions. The OHEP aimed to contribute to reductions in under-five  
30  
31 101 child mortality through enhancing utilisation of iCCM and community-based newborn care (CBNC)  
32  
33 102 services<sup>33</sup>. This study was part of the evaluation of OHEP intervention. We aimed to examine the  
34  
35 103 association between the health post readiness to serve and caregivers' awareness of pneumonia-related  
36  
37 104 services, care-seeking for sick children, and whether their 12-23 months old children had got three  
38  
39 105 pentavalent vaccinations.

## 106 **METHODS**

### 107 **Study setting and design**

108 The Ethiopian primary healthcare system typically consists of a primary hospital, a health centre and five  
109  
110 satellite health posts. A health post is the lowest service delivery point staffed by two health extension  
111  
112 workers serving around 5,000 rural residents. Since 2003, Ethiopia has implemented the health extension  
113  
114 program to achieve universal coverage of primary health care for the rural population. This national  
115  
116 program is implemented by health extension workers, and they provide basic promotive, preventive and  
117  
118 curative services through outreach and health post-based approaches. In 2010, after a change in policy  
119  
120 that allowed the health extension workers to treat child pneumonia, the Ethiopian Ministry of Health and  
121  
122 partners initiated the implementation of iCCM of childhood illnesses as part of the health extension  
123  
124 program. Under the iCCM program, the health extension workers examine, classify, and treat  
125  
126 pneumonia<sup>34 35</sup>.

118

119 The OHEP intervention had three components, i.e., community engagement activities, capacity building  
120 of health extension workers and women's development group leaders, and strengthening of the district  
121 health services' ownership and accountability of the primary newborn and child health services. The  
122 intervention was conducted in 26 intervention districts with 26 comparison districts spread in four regions  
123 of Ethiopia, namely Tigray, Amhara, Oromia and Southern Nations, Nationalities and Peoples Regions. The  
124 intervention started in 2016 and was completed in 2018. For the evaluation, baseline and end line surveys  
125 were performed. This paper reports a secondary analysis of end line cross-sectional data<sup>33</sup>.

### 126 **Participants**

127 This study included all caregivers and children aged 2 to 59 months, who resided in 52 study districts. It  
128 also includes all health posts with one or two health extension workers per health post serving these  
129 families.

### 130 **Sampling**

131 This study was based on secondary analysis of data from the endline survey that was part of the evaluation  
132 of the OHEP intervention. Sample size for the end line survey was estimated to measure changes in care-  
133 seeking and appropriate treatment for childhood illnesses between intervention and comparison areas at  
134 baseline and endline. Assumptions considered for the sample size calculation for the main OHEP  
135 evaluation<sup>36</sup> were 80% power to detect differences of 15% for the reported level of care-seeking (55%)  
136 and 20% for appropriate treatment for childhood illnesses (47%) at the baseline, design effect of 1.001  
137 and 90% completeness. Accordingly, a sample size of 12,000 households was obtained. With this number  
138 of households, 6,532 children below the age of five years were expected to be reached by the survey, of  
139 whom 368 were assumed to have any illnesses and 308 to have suspected pneumonia within two weeks  
140 before the survey.

141 The parent study used a sampling frame generated based on the 2007 Ethiopian Central Statistical Agency  
142 housing and population survey. Two hundred enumeration areas, i.e., clusters, were selected from 52  
143 study districts with probability proportional to size. A two-staged cluster sampling followed by systematic  
144 sampling to select 60 representative households from each study cluster. All caregivers of children aged  
145 2-59 months living in the selected households were interviewed. Moreover, all health posts and one or

1  
2  
3 146 two health extension workers from each health post serving the population of the study clusters were  
4  
5 147 included <sup>37</sup>.

### 6 7 148 **Data collection**

8  
9  
10 149 Data were collected using structured and pre-tested interviewer-administered questionnaires through an  
11  
12 150 electronic data collection software (CSpro survey software). The questionnaires were translated into local  
13  
14 151 languages (Amharic, Tigrigna, and Oromiffa) and back-translated into English. They comprised of three  
15  
16 152 main modules; household, healthcare provider and health facility modules (see supplementary files 1, 2  
17  
18 153 & 3). Data collectors and supervisors, who had bachelor's degree or above, were trained for two weeks  
19  
20 154 on data collection techniques, procedures, quality assurance, and ethical considerations of the study.  
21  
22 155 Further detailed information about data collection and quality control is available in the published study  
23  
24 156 protocol <sup>33</sup>.

### 25 26 157 **Outcomes**

27 158 The outcomes of this study are caregivers' awareness of pneumonia treatment, care-seeking behaviour  
28  
29 159 and coverage of pentavalent-3 immunisation as defined in the Demographic and Health Surveys <sup>28</sup>. The  
30  
31 160 awareness of availability of pneumonia treatment was calculated as the proportion of caregivers who had  
32  
33 161 heard messages regarding pneumonia treatment. Suspected pneumonia was ascertained by asking the  
34  
35 162 caregiver if the child had cough combined with either fast or difficult breathing due to chest problems  
36  
37 163 within two weeks before the survey. Care-seeking was defined as children with suspected pneumonia for  
38  
39 164 whom advice or treatment was sought from an appropriate care provider, i.e., either government or  
40  
41 165 private providers. The vaccination status of children aged 12-23 months was primarily assessed by  
42  
43 166 reviewing immunisation cards. When cards were not available at home, the caregivers were requested to  
44  
45 167 report the type of vaccines their children had received. Hence, coverage of pentavalent vaccination was  
46  
47 168 estimated as the proportion of children 12-23 months who had received three doses of pentavalent  
48  
49 169 vaccine.

### 50 51 170 **Health post readiness**

52 171 The readiness of health posts for sick child care was assessed using the World Health Organization Service  
53  
54 172 Availability and Readiness Assessment tool <sup>38</sup>. Using 23 tracer items, the preparedness of facilities was  
55  
56 173 shown in five domains or indices, i.e., basic amenities, basic equipment, standard precaution equipment  
57  
58 174 for infection prevention, diagnostic capacity, and essential medicines. The mean availability of items

1  
2  
3 175 across the four domains of readiness was estimated by assigning equal weight to each of the items, and  
4  
5 176 was expressed as a proportion. Health posts' diagnostic capacity was shown as the proportion of facilities  
6  
7 177 having rapid diagnostic test for malaria. The general service readiness was calculated as the average of  
8  
9 178 percentages depicting mean availability of tracer items in five indices<sup>38</sup>. The availability of vaccination  
10  
11 179 card at the health posts was also estimated. The number of health extension workers working at the  
12  
13 180 health post and the percentage of these workers trained in iCCM and who had received supportive  
14  
15 181 supervision during six months before the survey were also calculated. The health post demand generation  
16  
17 182 activities were recorded as the proportion of health posts showing opening days or that used community  
18  
19 183 forums to deliver maternal and child health education.

## 19 184 **Analyses**

20  
21 185 The household socio-economic status was constructed through principal component analysis of  
22  
23 186 household assets, ownership of house, livestock, agricultural land, and access to utilities and  
24  
25 187 infrastructures. The factor scores were summed and ranked into quintiles from the poorest to the least  
26  
27 188 poor.

28  
29 189 The study linked the household, health facility and care provider information. Our analysis was based on  
30  
31 190 linked samples for outcome variables, i.e., caregivers' awareness of pneumonia treatment (n=4,934), care-  
32  
33 191 seeking when the child was sick (n=613) and vaccination of 12-23 months old children with a third dose  
34  
35 192 of pentavalent immunisation (n=860). Care-seeking was assessed for all childhood illness episodes,  
36  
37 193 including symptoms of suspected pneumonia as reported by caregivers for the two weeks prior to the  
38  
39 194 survey. The effect of clustering on three of the study outcomes was examined by estimating Intra Cluster  
40  
41 195 Correlation Coefficients (ICC). A multilevel binary logistic regression model was fitted to examine the  
42  
43 196 association between health post readiness and household level awareness, care-seeking and utilisation of  
44  
45 197 three doses of pentavalent vaccinations. We checked for potential household-level confounders. The  
46  
47 198 fitness of the model was checked through Likelihood Ratio Test. Data were analysed using Stata version  
48  
49 199 14.

## 48 200 **Patient and public involvement**

50  
51 201 Patients or the public were not involved in the design or conduct or reporting or dissemination  
52  
53 202 plans of this research.

## 54 203 **RESULTS**

## 204 Characteristics of caregivers and children

205 A total of 10,785 households from 181 study clusters, 165 health posts and 274 health extension workers  
 206 were included in the survey. A total of 4,729 eligible caregivers with 5,787 children aged 2-59 months  
 207 were included in the analyses. A majority of the caregivers had no schooling (59.4%) and were currently  
 208 married (88.6%). About two-thirds (64.0%) of caregivers were able to access the nearest health facility  
 209 within 30 minutes of walk from their home (Table 1).

210 Table 1 Socio-demographic characteristics of caregivers and children aged 2-59 months in four regions  
 211 of Ethiopia, December 2018 to February 2019

| Characteristics                                                      | Frequency | Percentage |
|----------------------------------------------------------------------|-----------|------------|
| Caregivers' characteristics (n=4,729)                                |           |            |
| Age                                                                  |           |            |
| <25                                                                  | 885       | 18.7       |
| 25-29                                                                | 1,281     | 27.1       |
| 30-34                                                                | 1,038     | 22.0       |
| 35-39                                                                | 867       | 18.3       |
| >=40                                                                 | 658       | 13.9       |
| Marital status                                                       |           |            |
| Currently married                                                    | 4,067     | 88.6       |
| Unmarried                                                            | 521       | 11.4       |
| Education                                                            |           |            |
| No schooling                                                         | 2,810     | 59.4       |
| Schooling                                                            | 1,919     | 40.6       |
| Number of children under five                                        |           |            |
| 1                                                                    | 3,487     | 73.7       |
| 2                                                                    | 1,148     | 24.3       |
| 3+                                                                   | 94        | 2.0        |
| Socio-economic quintiles                                             |           |            |
| Q1 (poorest)                                                         | 1,024     | 21.7       |
| Q2                                                                   | 982       | 20.8       |
| Q3                                                                   | 874       | 18.5       |
| Q4                                                                   | 895       | 18.9       |
| Q5 (least poor)                                                      | 954       | 20.1       |
| Walking distance from household to nearest health facility (n=3,918) |           |            |
| <=30 minutes                                                         | 2,507     | 64.0       |
| >30 minute                                                           | 1,411     | 36.0       |
| Child (2-59 months) characteristics (n=5,787)                        |           |            |
| Sex                                                                  |           |            |
| Male                                                                 | 2,961     | 51.2       |
| Female                                                               | 2,826     | 48.8       |
| Age                                                                  |           |            |
| 2-11 Months                                                          | 959       | 16.6       |
| 12-23 Months                                                         | 992       | 17.1       |
| 24-35 Months                                                         | 1114      | 19.3       |
| 36-59 Months                                                         | 2722      | 47.0       |

212

### 213 **Characteristics of health posts and health extension workers**

214 The median number of households served by the health post was 1,181. The majority (85.1%) of the health  
 215 posts were functionally open for five days or more per week. More than a tenth (12.7%) of the health  
 216 posts were served by only one health extension worker. Most (78.8%) of the health extension workers  
 217 were trained in the iCCM of childhood illnesses. More than three-fourth (78.8%) had received supportive  
 218 supervision within six months preceding the survey. Three-quarters used community forums or meetings  
 219 to deliver maternal and child health education within three months prior to the survey (Table 2).

220 Table 2 Characteristics of health posts in four regions of Ethiopia, December 2018 to February 2019

| Characteristics                                                      | Frequency         | Percentage |
|----------------------------------------------------------------------|-------------------|------------|
| Health posts catchment area population (n=165)                       |                   |            |
| Number of households, median (Inter-quartile range)                  | 1,181 (841, 1572) |            |
| Number of children under five years, median (Inter-quartile range)   | 780 (493, 1065)   |            |
| Health extension workers' characteristics (274)                      |                   |            |
| Number of health extension workers per health post                   |                   |            |
| One                                                                  | 35                | 12.7       |
| Two                                                                  | 142               | 51.8       |
| Three and above                                                      | 97                | 35.4       |
| Health post opening days per week                                    |                   |            |
| 1 to 4 days                                                          | 41                | 14.9       |
| 5 to 7 days                                                          | 233               | 85.1       |
| Posted health post opening days                                      | 54                | 19.7       |
| Trained for iCCM* of childhood illnesses                             | 216               | 78.8       |
| Received supportive supervision in the last six months               | 216               | 78.8       |
| Participated in Performance Review and Clinical Mentorship meetings  | 126               | 46.0       |
| Used community forums to deliver maternal and child health education | 205               | 74.8       |

221 \* Integrated community case management

### 222 **Health post preparedness to deliver sick child care services**

223 The general service readiness of health posts (n=165) to deliver sick child health services was estimated  
 224 at 62.8%. Half of the health posts had Rapid Diagnostic Test for malaria, and the mean availability of  
 225 essential medicines was 66.9%. Relatively higher mean availability (80.1%) of tracer items was shown for  
 226 basic equipment, while the lowest (48.7%) was for availability of standard precaution items. Very few  
 227 health posts had all essential medicines and standard precaution equipment. Most of the health posts  
 228 (84.2%) had vaccination cards (Figure 1).

229 Figure 1 Percentage of health posts (n=165) with drugs and supplies to deliver pneumonia-related and  
 230 other sick child care services in four regions of Ethiopia, December 2018 to February 2019

### 231 **Awareness of treatment, actual care-seeking and utilisation of preventive immunisation**

232 During the two weeks before the survey 704 (12.3%) of the children had any illnesses. Of these, 44 children  
 233 had symptoms and signs of suspected pneumonia. Only one in five (23.9%) caregivers were aware of the  
 234 availability of pneumonia treatment services. Health care was sought for one-third (36.1%) of children  
 235 with any illnesses and for 56.8% of children with suspected pneumonia. Almost half (49.3%) of children  
 236 aged 12-23 months had received three doses of pentavalent vaccinations (Table 3).

237 Table 3 Childhood illness and care utilisation by child demographic characteristics in four regions of  
 238 Ethiopia, December 2018 to February 2019

| Service utilisation                                            | Frequency | Percentage |
|----------------------------------------------------------------|-----------|------------|
| Children with any illnesses                                    |           |            |
| Yes                                                            | 704       | 12.3       |
| No                                                             | 5,021     | 87.7       |
| Childhood illnesses by sex (n=704)                             |           |            |
| Male                                                           | 362       | 51.4       |
| Female                                                         | 342       | 48.6       |
| Childhood illnesses by age (n=704)                             |           |            |
| 2-11 Months                                                    | 121       | 17.2       |
| 12-23 Months                                                   | 147       | 20.9       |
| 24-35 Months                                                   | 152       | 21.6       |
| 36-59 Months                                                   | 284       | 40.3       |
| Child with suspected pneumonia                                 |           |            |
| Yes                                                            | 44        | 0.8        |
| No                                                             | 5,743     | 99.2       |
| Child with suspected pneumonia treated with antibiotics (n=44) |           |            |
| Yes                                                            | 17        | 38.6       |
| No                                                             | 27        | 61.4       |
| Full pentavalent vaccination by sex (n=489)                    |           |            |
| Male                                                           | 258       | 52.8       |
| Female                                                         | 231       | 47.2       |

239  
 240 **Association between health post readiness and awareness and utilisation of pneumonia care**  
 241 The Intra Cluster Correlation Coefficient (ICC) indicated that the study outcomes, i.e., awareness of  
 242 pneumonia treatment (ICC=0.29, 95% CI: 0.24, 0.36), care-seeking behaviour (ICC=0.16, 95% CI: 0.10, 0.27)  
 243 and pentavalent vaccination (ICC=0.28, 95% CI: 0.20, 0.38) significantly varied with level of clusters. While

checking for the household-level confounders, we found that none of the household, caregiver and child characteristics were associated with the outcomes and main exposure variables, i.e., the five health post readiness indices. But regardless of the statistical screening criteria (P-value <0.2), analyses were adjusted for maternal age, education and area of residence (intervention-comparison area) variables.

Analyses tested the association of general health post readiness index with study outcomes were adjusted for health extension workers' iCCM training, supportive supervision, participation at performance review and clinical mentorship meeting, home visiting, use of community forums, opening days and number of staff at health post, mothers' age, education and area of residence (intervention-comparison area) variables. The adjusted multilevel analyses revealed that general health post readiness was not associated with caregivers' awareness of availability of pneumonia treatment [AOR= 0.9, 95% CI 0.7 to 1.1] or utilisation of pentavalent-3 immunisation [AOR= 1.2, 95% CI 0.8 to 1.6]. The general health post readiness was negatively associated with care-seeking for childhood illnesses [AOR= 0.6, 95% CI 0.4 to 0.8], Table 4.

Table 4 General health post readiness and caregivers' awareness, care-seeking and utilisation of pentavalent-3 immunisation in four regions of Ethiopia, December 2018 to February 2019

| Awareness and utilisation                   | General readiness         |                              |
|---------------------------------------------|---------------------------|------------------------------|
|                                             | Crude Odds Ratio (95% CI) | Adjusted Odds Ratio (95% CI) |
| Awareness of treatment service (N= 4,934) * | 0.9 (0.7,1.1)             | 0.9 (0.7,1.1)                |
| Care-seeking (N=613) *                      | 0.7 (0.5,0.9)             | 0.6 (0.4,0.8)                |
| Pentavalent-3 (N=860) *                     | 1.2 (0.9,1.6)             | 1.2 (0.8,1.6)                |

\* Analyses adjusted for health extension workers' iCCM training, supportive supervision, participation at performance review and clinical mentorship meeting, home visiting, use of community forums, opening days and number of staff at health post, mothers' age, education and area of residence.

As illustrated in Table-5, none of the health post readiness indices were associated with caregivers' awareness of availability of pneumonia treatment and care-seeking for childhood illnesses. Only availability of standard precaution equipment for infection prevention was positively associated with utilisation of pentavalent-3 immunisation [AOR= 4.5, 95% CI 1.6 to 12.8]. Home visiting by the health extension workers was associated with higher odds for caregivers' awareness of availability of pneumonia treatment [AOR= 2.9, 95% CI 2.3 to 3.6].



268 Table 5 Health post preparedness indices associated with caregivers' awareness, care-seeking and utilisation of three doses of pentavalent  
 269 vaccines in four regions of Ethiopia, December 2018 to February 2019

| Characteristics                                               | Awareness of treatment service (N= 4,934) |         |                           |                              | Care-seeking (N=613) |                  |                           |                              | Pentavalent-3 (N=860) |                |                           |                              |
|---------------------------------------------------------------|-------------------------------------------|---------|---------------------------|------------------------------|----------------------|------------------|---------------------------|------------------------------|-----------------------|----------------|---------------------------|------------------------------|
|                                                               | Aware                                     | Unaware | Crude Odds Ratio (95% CI) | Adjusted Odds Ratio (95% CI) | Sought care          | Didn't seek care | Crude Odds Ratio (95% CI) | Adjusted Odds Ratio (95% CI) | Vaccinated            | Not vaccinated | Crude Odds Ratio (95% CI) | Adjusted Odds Ratio (95% CI) |
| <b>Basic amenities</b>                                        |                                           |         |                           |                              |                      |                  |                           |                              |                       |                |                           |                              |
| All not available                                             | 923                                       | 2,867   | 1.0                       | 1.0                          | 161                  | 270              | 1.0                       | 1.0                          | 325                   | 337            | 1.0                       | 1.0                          |
| All available                                                 | 256                                       | 888     | 0.9 (0.6,1.5)             | 0.9 (0.6,1.5)                | 49                   | 133              | 0.7 (0.4,1.1)             | 0.7 (0.4,1.2)                | 98                    | 100            | 0.9 (0.6,1.8)             | 0.9 (0.6,1.8)                |
| <b>Basic equipment</b>                                        |                                           |         |                           |                              |                      |                  |                           |                              |                       |                |                           |                              |
| All not available                                             | 590                                       | 2,021   | 1.0                       | 1.0                          | 117                  | 202              | 1.0                       | 1.0                          | 219                   | 224            | 1.0                       | 1.0                          |
| All available                                                 | 589                                       | 1,734   | 1.3 (0.9,1.9)             | 1.2 (0.8,1.9)                | 93                   | 201              | 0.8 (0.5,1.3)             | 0.9 (0.5,1.4)                | 204                   | 213            | 0.9 (0.6,1.6)             | 0.8 (0.5,1.4)                |
| <b>Standard precaution equipment for infection prevention</b> |                                           |         |                           |                              |                      |                  |                           |                              |                       |                |                           |                              |
| All not available                                             | 1,091                                     | 3,555   | 1.0                       | 1.0                          | 202                  | 379              | 1.0                       | 1.0                          | 386                   | 414            | 1.0                       | 1.0                          |
| All available                                                 | 88                                        | 200     | 1.9 (0.9,3.9)             | 1.9 (0.9,4.2)                | 8                    | 24               | 0.6 (0.2,1.7)             | 0.8 (0.3,2.1)                | 37                    | 23             | 2.3 (0.9,5.6)             | 4.5 (1.6,12.8)               |
| <b>Rapid diagnostic test for malaria</b>                      |                                           |         |                           |                              |                      |                  |                           |                              |                       |                |                           |                              |
| No available                                                  | 597                                       | 1,858   | 1.0                       | 1.0                          | NA                   | NA               | NA                        | NA                           | NA                    | NA             | NA                        | NA                           |
| Available                                                     | 582                                       | 1,897   | 0.8 (0.5,1.2)             | 0.7 (0.4,1.1)                | NA                   | NA               | NA                        | NA                           | NA                    | NA             | NA                        | NA                           |
| <b>Essential medicine</b>                                     |                                           |         |                           |                              |                      |                  |                           |                              |                       |                |                           |                              |
| First tercile                                                 | 354                                       | 1025    | 1.0                       | 1.0                          | 58                   | 98               | 1                         | 1                            | 108                   | 126            | 1.0                       | 1.0                          |
| Second tercile                                                | 396                                       | 1355    | 0.9 (0.5,1.4)             | 0.9 (0.5,1.4)                | 76                   | 142              | 0.8 (0.4,1.4)             | 0.8 (0.4,1.5)                | 129                   | 145            | 0.9 (0.5,1.8)             | 0.8 (0.4,1.6)                |
| Third tercile                                                 | 429                                       | 1375    | 0.8 (0.5,1.3)             | 0.8 (0.5,1.4)                | 76                   | 163              | 0.7 (0.4,1.3)             | 0.7 (0.4,1.4)                | 186                   | 166            | 1.3 (0.7,2.3)             | 1.1 (0.6,2.1)                |
| <b>Number of health extension workers per health post</b>     |                                           |         |                           |                              |                      |                  |                           |                              |                       |                |                           |                              |
| One                                                           | 226                                       | 784     | 1.0                       | 1.0                          | 47                   | 71               | 1.0                       | 1.0                          | 73                    | 68             | 1.0                       | 1.0                          |
| Two and above                                                 | 953                                       | 2,971   | 1.2 (0.7,1.9)             | 1.2 (0.7,1.9)                | 163                  | 332              | 0.8 (0.4,1.4)             | 0.8 (0.5,1.5)                | 350                   | 369            | 0.9 (0.5,1.6)             | 0.7 (0.4,1.4)                |
| <b>Number of health post opening days</b>                     |                                           |         |                           |                              |                      |                  |                           |                              |                       |                |                           |                              |
| Less than five days                                           | 209                                       | 582     | 1.0                       | 1.0                          | 43                   | 71               | 1.0                       | 1.0                          | 61                    | 67             | 1.0                       | 1.0                          |

|                                                                                             |     |       |                  |                  |     |     |                  |                  |     |     |                  |                  |
|---------------------------------------------------------------------------------------------|-----|-------|------------------|------------------|-----|-----|------------------|------------------|-----|-----|------------------|------------------|
| Five days and above                                                                         | 970 | 3,173 | 0.8<br>(0.5,1.3) | 0.7<br>(0.4,1.2) | 167 | 332 | 0.9<br>(0.5,1.5) | 0.7<br>(0.4,1.4) | 362 | 370 | 1.3<br>(0.7,2.5) | 1.4<br>(0.7,2.8) |
| Health extension workers used community forum                                               |     |       |                  |                  |     |     |                  |                  |     |     |                  |                  |
| No                                                                                          | 297 | 1,003 | 1.0              | 1.0              | 70  | 139 | 1.0              | 1.0              | 113 | 131 | 1.0              | 1.0              |
| Yes                                                                                         | 882 | 2,752 | 1.2<br>(0.8,1.8) | 1.3<br>(0.8,1.9) | 140 | 264 | 1.0<br>(0.6,1.6) | 0.9<br>(0.6,1.5) | 310 | 306 | 1.3<br>(0.8,2.2) | 1.3<br>(0.7,2.2) |
| Health extension workers received supervision                                               |     |       |                  |                  |     |     |                  |                  |     |     |                  |                  |
| No                                                                                          | NA  | NA    | NA               | NA               | 44  | 105 | 1.0              | 1.0              | 60  | 68  | 1.0              | 1.0              |
| Yes                                                                                         | NA  | NA    | NA               | NA               | 166 | 298 | 1.3<br>(0.8,2.3) | 1.5<br>(0.8,2.6) | 363 | 369 | 1.4<br>(0.7,2.5) | 1.1<br>(0.5,2.2) |
| Health extension workers received iCCM training                                             |     |       |                  |                  |     |     |                  |                  |     |     |                  |                  |
| Did not received training                                                                   | NA  | NA    | NA               | NA               | 40  | 74  | 1.0              | 1.0              | NA  | NA  | NA               | NA               |
| Received training                                                                           | NA  | NA    | NA               | NA               | 170 | 329 | 0.9<br>(0.5,1.6) | 0.9<br>(0.5,1.7) | NA  | NA  | NA               | NA               |
| Health extension workers participated at Performance Review and Clinical Mentorship meeting |     |       |                  |                  |     |     |                  |                  |     |     |                  |                  |
| No                                                                                          | NA  | NA    | NA               | NA               | 123 | 252 | 1.0              | 1.0              | 232 | 252 | 1.0              | 1.0              |
| Yes                                                                                         | NA  | NA    | NA               | NA               | 87  | 151 | 1.2<br>(0.8,1.9) | 1.2<br>(0.7,2.0) | 191 | 185 | 1.2<br>(0.7,1.9) | 0.9<br>(0.5,1.5) |
| Home visting                                                                                |     |       |                  |                  |     |     |                  |                  |     |     |                  |                  |
| No                                                                                          | 934 | 3,445 | 1                | 1                | 175 | 357 | 1                | 1                | 372 | 386 | 1.0              | 1.0              |
| Yes                                                                                         | 244 | 309   | 2.9<br>(2.4,3.7) | 2.9<br>(2.3,3.6) | 35  | 46  | 1.6<br>(0.9,2.6) | 1.5<br>(0.9,2.5) | 51  | 38  | 1.6<br>(0.9,2.7) | 1.6<br>(0.9,2.7) |

270

271

272

## 273 **DISCUSSION**

274 Overall, this study showed insufficient health post service preparedness and low household awareness  
275 and utilisation of preventive and curative services for childhood suspected pneumonia. There was no  
276 consistent association between facility preparedness and utilisation of preventive and curative services.

### 277 **Strengths and limitations**

278 With an attempt of narrowing the existing scarcity of evidence, our study examined the association  
279 between health post readiness and household-level awareness and utilisation of pneumonia relevant  
280 health services in a wider geographic area. Readiness of health posts was measured using the standard  
281 WHO Health Service Availability and Readiness Assessment tool. This tool is presumed to generate  
282 objective and reliable information that is comparable across or within countries. We pretested and  
283 adopted the tool to the local context and to level of care provided at health posts<sup>38</sup>. When vaccination  
284 cards were not available at home, children's pentavalent immunisation status was assessed through  
285 interviewing the caregivers. Ascertainment of childhood suspected pneumonia and other illnesses was  
286 based on the caregivers' two weeks reported symptoms prior to the survey. These ascertainment  
287 techniques have been used by the Demographic and Health Surveys, but might anyhow be influenced by  
288 recall bias<sup>28</sup>. Furthermore, we assessed health post service readiness and pneumonia service utilisation  
289 in selected districts of four Ethiopian regions. The findings may not be generalizable to other geographic  
290 areas and health system levels.

### 291 **Health post preparedness**

292 This study showed that two-thirds of the health posts were ready to provide sick child care, suggesting  
293 that the remaining facilities were not able to deliver such services. More or less similar level of structural  
294 preparedness of health posts or primary health care facilities for pneumonia and other sick child care were  
295 previously reported in Ethiopia and from other low- and middle-income countries<sup>10 39 40</sup>. Furthermore,  
296 health posts or health centres of Ethiopia and other low-income countries were found with low readiness  
297 to provide quality care to sick children<sup>9</sup>. According to the Ethiopia health system, a health centre is  
298 structured to support and strengthen five health posts within their catchment areas, hence insufficient  
299 preparedness of the surveyed health posts could be explained by scarcity of supplies at health centres<sup>29</sup>  
300<sup>41</sup>. The weak linkage and inadequate support from the health centres or the health system could further  
301 cause scarcity of drugs and supplies and unpreparedness of staff to serve at health posts<sup>22 42</sup>. The lack of

1  
2  
3 302 readiness at health posts could also be related to the donor-dependent nature of supplies and the health  
4  
5 303 extension workers' lack of accountability and capacity in supply-chain management<sup>34 43 44</sup>.

6  
7 304 Inadequate readiness of health posts in the study setting and other low-income countries indicates a  
8  
9 305 serious challenge to community case management of pneumonia, particularly in the rural or unreached  
10  
11 306 communities, where a majority of preventable deaths occur<sup>6 28</sup>. Most importantly, only a few of the  
12  
13 307 surveyed health posts had all essential medicines and just half had diagnostic equipment, clearly  
14  
15 308 indicating their limitations in providing effective pneumonia or sick child treatment<sup>56</sup>. Scarcity of essential  
16  
17 309 medicines in Ethiopia and other Sub-Saharan African countries results in missed pneumonia treatments  
18  
19 310 at facility level<sup>13 17 29</sup>. Unavailability of rapid diagnostic tests impairs community health workers' ability to  
20  
21 311 differentiate suspected pneumonia from malaria in case of symptom overlap, a common clinical problem  
22  
23 312 in African children<sup>45-47</sup>.

### 23 313 **Awareness and utilisation of pneumonia-related health services**

24  
25  
26 314 Our study revealed low health care utilisation for pneumonia-specific preventive and curative services.  
27  
28 315 These levels of service utilisation were lower compared to the reported regional pentavalent-3  
29  
30 316 immunisation coverage (80%) and care-seeking behaviour (85%) for childhood suspected pneumonia and  
31  
32 317 other illnesses in Sub-Saharan African Countries<sup>48 49</sup>. Community awareness of illness and sick child care  
33  
34 318 is a pre-requisite for timely utilisation of health services<sup>50</sup>. We found that less than a fifth of caregivers  
35  
36 319 were aware of the availability of pneumonia treatment services, and this might partly explain the observed  
37  
38 320 poor utilisation of pneumonia-related health services in the study setting<sup>51 52</sup>. The reported low care  
39  
40 321 utilisation could also be explained by inadequate readiness or service quality of the primary health care  
41  
42 322 facilities for pneumonia-related preventive and treatment services<sup>39 53</sup>. The OHEP evaluation studies have  
43  
44 323 revealed a low quality of sick child care services provided at the primary health care facilities, and  
45  
46 324 caregivers of children have also mentioned this as a key barrier to seek care at health posts<sup>54-56</sup>. A study  
47  
48 325 in 22 African countries noted a low level of community trust in public health facilities as an important  
49  
50 326 reason to the low coverage of child vaccination<sup>57</sup>.

### 48 327 **Association between health post preparedness and utilisation of preventive immunisation and care-** 49 50 328 **seeking behaviour**

51  
52  
53 329 Earlier studies have shown a positive association between health facility readiness and utilisation of first-  
54  
55 330 level sick child care<sup>11 21</sup>. We did not find any consistent pattern of relationship between facility readiness  
56  
57 331 indices and utilisation of services. There was a positive association between the availability of standard

1  
2  
3 332 precaution equipment for infection prevention and utilisation of pentavalent-3 immunisation. However,  
4  
5 333 the general health post readiness had no association with awareness and coverage of pentavalent-3  
6  
7 334 immunisation, but a negative association with care-seeking for childhood suspected pneumonia and other  
8  
9 335 illnesses. Studies in Haiti and Ethiopia have shown absence of association between readiness of primary  
10  
11 336 health care facilities for sick child care and caregivers' utilization and satisfaction to the respective services  
12  
13 337 <sup>40 58</sup>. The lack of consistent positive association may be linked to the dominating low level of health post  
14  
15 338 preparedness. The community's value to quality of healthcare service is a key driver of their decision to  
16  
17 339 seek care, and this may subserve the lack of consistent association between facility readiness and  
18  
19 340 utilization of pneumonia services. Irrespective of the readiness of health posts, caregivers' preconceived  
20  
21 341 lack of trust to quality of primary child health services could motivate the use of other facilities with  
22  
23 342 perceived higher service quality<sup>54</sup>. Equipping health care facilities with relevant equipment is a  
24  
25 343 prerequisite to enhance the quality of iCCM services <sup>6</sup>. Hence, the reported lack of association of health  
26  
27 344 post readiness with awareness and utilisation of pneumonia treatment services suggests that simply  
28  
29 345 equipping facilities with necessary supplies is not a guarantee to reach the intended level of community  
30  
31 346 awareness and utilisation of health services. Health facility strengthening efforts should go along with  
32  
33 347 implementation of awareness creation and demand generation interventions to increase the community  
34  
35 348 awareness, trust and utilisation of pneumonia-related and other child health services <sup>50</sup>. Our previous  
36  
37 349 study showed higher parents' care-seeking for childhood suspected pneumonia among those with  
38  
39 350 improved awareness of treatment service<sup>59</sup>. The current study also illustrated that parents' awareness of  
40  
41 351 pneumonia treatment was higher when health extension workers had visited at home. Home visiting by  
42  
43 352 the community health workers is a vital strategy to promote child health and enhance awareness and  
44  
45 353 utilisation of health services <sup>50 60</sup>. A sub-study of the same project also showed that awareness creation  
46  
47 354 and delivery of preventive child health interventions (such as immunisations) were the main components  
48  
49 355 of outreach services delivered by the health extension workers <sup>54</sup>.

#### 356 **Relation of findings with already published OHEP evaluation studies**

46  
47 357 This study was part of the end line evaluation of the OHEP intervention. The findings showed sizable gaps  
48  
49 358 in structural readiness of health posts for sick child care. Results of our published baseline study also  
50  
51 359 illustrated the scarcity of essential drugs and other supplies at the health posts <sup>29</sup>. Sub-studies of the same  
52  
53 360 project investigated quality of sick child care, showing low clinical performance of the health extension  
54  
55 361 workers to identify and treat childhood suspected pneumonia and other illnesses <sup>55 56</sup>. A qualitative study  
56  
57 362 noted lack of caregivers' trust in the health extension workers' clinical competency to manage sick

1  
2  
3 363 children and a low availability of essential drugs, diagnostics and other supplies at health posts. The low  
4  
5 364 quality of sick child care at health posts is a barrier to utilise these services<sup>54</sup>.

## 6 7 365 **CONCLUSIONS**

8  
9 366 This study has shown a low health post readiness for services, and low household awareness and  
10  
11 367 utilisation of pneumonia-relevant preventive and curative services. Parents' awareness and utilisation of  
12  
13 368 pneumonia-specific preventive and curative services were not consistently associated with the health post  
14  
15 369 readiness. The results underline the critical importance of intensifying the health extension workers'  
16  
17 370 awareness creation and demand generation efforts in each kebele (the lowest administrative unit in  
18  
19 371 Ethiopia). Enhancing the coverage of home visiting and other awareness creation activities are crucial to  
20  
21 372 boost community awareness and utilization of pneumonia and other sick child care services. Our findings  
22  
23 373 also underline the pivotal role of improving the availability and quality of pneumonia and other sick child  
24  
25 374 care services to ensure optimal uptake of the services. It is imperative that the district health offices  
26  
27 375 strengthen the linkages within the primary healthcare units to increase the availability of essential  
28  
29 376 medicines and readiness of the health posts for sick child care. The office should also optimize the  
30  
31 377 availability of essential medicines and supplies at health centers that are the suppliers to the satellite  
32  
33 378 health posts. Improving the coverage of regular supportive supervision, performance reviews and clinical  
34  
35 379 mentorship could also help to timely identify and solve gaps in the availability of drug and other supplies  
36  
37 380 at health posts. Community awareness creation and demand generation efforts should simultaneously be  
38  
39 381 accompanied with health facility strengthening strategies.

## 37 382 **REFERENCES**

- 39  
40 383 1. Liu L, Johnson HL, Cousens S, et al. Global, regional, and national causes of child mortality: an updated  
41 384 systematic analysis for 2010 with time trends since 2000. *The Lancet* 2012;**379**(9832):2151-61.
- 42 385 2. United Nations Inter-agency Group for Child Mortality Estimation (UN IGME), 'Levels & Trends in Child  
43 386 Mortality: Report 2020, Estimates developed by the United Nations Inter-agency Group for Child  
44 387 Mortality Estimation', United Nations Children's Fund, New York, 2020.
- 45 388 3. McAllister DA, Liu L, Shi T, et al. Global, regional, and national estimates of pneumonia morbidity and  
46 389 mortality in children younger than 5 years between 2000 and 2015: a systematic analysis. *The*  
47 390 *Lancet Global Health* 2019;**7**(1):e47-e57.
- 48 391 4. Bhutta ZA, Das JK, Walker N, et al. Interventions to address deaths from childhood pneumonia and  
49 392 diarrhoea equitably: what works and at what cost? *The Lancet* 2013;**381**(9875):1417-29.
- 50 393 5. World Health Organization. *Management of pneumonia in community settings*: World Health  
51 394 Organization, Department of Child and Adolescent Health and ..., 2004.
- 52 395 6. World Health Organization. WHO/UNICEF joint statement integrated community case management  
53 396 (iCCM): an equity-focused strategy to improve access to essential treatment services for children.  
54 397 Geneva and New York 2012.

- 398 7. Geldsetzer P, Williams TC, Kirolos A, et al. The recognition of and care seeking behaviour for childhood  
399 illness in developing countries: a systematic review. *PloS one* 2014;**9**(4):e93427.
- 400 8. Adedokun ST, Yaya S. Factors influencing mothers' health care seeking behaviour for their children:  
401 evidence from 31 countries in sub-Saharan Africa. *BMC Health Services Research* 2020;**20**:842.
- 402 9. Macarayan EK, Gage AD, Doubova SV, et al. Assessment of quality of primary care with facility surveys:  
403 a descriptive analysis in ten low-income and middle-income countries. *The Lancet Global Health*  
404 2018;**6**(11):e1176-e85.
- 405 10. Acharya K B, J, and Tuladhar S,. Client Satisfaction and Quality of Curative Services for Sick Children in  
406 Nepal. DHS Further Analysis Reports No. 114. Rockville, Maryland, USA: ICF. 2018.
- 407 11. Liu L, Leslie HH, Joshua M, et al. Exploring the association between sick child healthcare utilisation and  
408 health facility quality in Malawi: a cross-sectional study. *BMJ open* 2019;**9**(7):e029631.
- 409 12. Shawon MSR, Adhikary G, Ali MW, et al. General service and child immunization-specific readiness  
410 assessment of healthcare facilities in two selected divisions in Bangladesh. *BMC health services*  
411 *research* 2018;**18**(1):39.
- 412 13. Taylor C, Linn A, Wang W, et al. Examination of malaria service utilization and service provision: an  
413 analysis of DHS and SPA data from Malawi, Senegal, and Tanzania. *Malaria journal* 2019;**18**(1):258.
- 414 14. Blanas DA, Ndiaye Y, Nichols K, et al. Barriers to community case management of malaria in Saraya,  
415 Senegal: training, and supply-chains. *Malaria journal* 2013;**12**(1):95.
- 416 15. Masters SH, Burstein R, DeCenso B, et al. Pharmaceutical availability across levels of care: evidence  
417 from facility surveys in Ghana, Kenya, and Uganda. *PloS one* 2014;**9**(12):e114762.
- 418 16. Ssempiira J, Kasirye I, Kissa J, et al. Measuring health facility readiness and its effects on severe malaria  
419 outcomes in Uganda. *Scientific Reports* 2018.
- 420 17. Bagonza J, Rutebemberwa E, Eckmanns T, et al. What influences availability of medicines for the  
421 community management of childhood illnesses in central Uganda? Implications for scaling up the  
422 integrated community case management programme. *BMC Public Health* 2015;**15**(1):1-8.
- 423 18. International EPHIEFMoHI. Ethiopia Service Provision Assessment Plus Survey. 2014.
- 424 19. Shaw B, Amouzou A, Miller NP, et al. Determinants of utilization of health extension workers in the  
425 context of scale-up of integrated community case management of childhood illnesses in Ethiopia.  
426 *The American journal of tropical medicine and hygiene* 2015;**93**(3):636-47.
- 427 20. Anselmi L, Lagarde M, Hanson K. Health service availability and health seeking behaviour in resource  
428 poor settings: evidence from Mozambique. *Health Economics Review* (2015) 5:26
- 429 21. Kuwawenaruwa A, Wyss K, Wiedenmayer K, et al. The effects of medicines availability and stock-outs  
430 on household's utilization of healthcare services in Dodoma region, Tanzania. *Health policy and*  
431 *planning* 2020;**35**(3):323-33.
- 432 22. Kok MC, Kea AZ, Datiko DG, et al. A qualitative assessment of health extension workers' relationships  
433 with the community and health sector in Ethiopia: opportunities for enhancing maternal health  
434 performance. *Human resources for health* 2015;**13**(1):80.
- 435 23. Befekadu A, Yitayal M. Knowledge and practice of health extension workers on drug provision for  
436 childhood illness in west Gojjam, Amhara, Northwest Ethiopia. *BMC Public Health* 2020;**20**:1-10.
- 437 24. Miller NP, Amouzou A, Tafesse M, et al. Integrated community case management of childhood illness  
438 in Ethiopia: implementation strength and quality of care. *The American journal of tropical*  
439 *medicine and hygiene* 2014;**91**(2):424-34.
- 440 25. Tilahun H, Fekadu B, Abdisa H, et al. Ethiopia's health extension workers use of work time on duty:  
441 time and motion study. *Health policy and planning* 2017;**32**(3):320-28.
- 442 26. Datiko DG, Bunte EM, Birrie GB, et al. Community participation and maternal health service utilization:  
443 lessons from the health extension programme in rural southern Ethiopia. *Journal of Global Health*  
444 *Reports* 2019;**3**.

- 1  
2  
3 445 27. Mangham-Jefferies L, Mathewos B, Russell J, et al. How do health extension workers in Ethiopia  
4 446 allocate their time? *Human resources for health* 2014;**12**(1):61.
- 5 447 28. Central Statistical Agency [Ethiopia] and ICF International. Ethiopia Demographic and Health Survey  
6 448 2016. Addis Ababa, Ethiopia and Calverton, Maryland, USA: Central Statistical Agency and ICF  
7 449 International. 2017.
- 8 450 29. Tariku A, Okwaraji YB, Worku A, et al. Prevention and treatment of suspected pneumonia in Ethiopian  
9 451 under-five children from household to primary care. *Acta Paediatrica* 2020.
- 10 452 30. Berhanu A, Alemayehu M, Kassa Daka WB, et al. Utilization of Integrated Community Case  
11 453 Management of Childhood Illnesses at Health Posts in Southern Ethiopia. *Pediatric Health,  
12 454 Medicine and Therapeutics* 2020;**11**:459.
- 13 455 31. Ethiopian Public Health Institute: World Health Organization. Ethiopia Service Availability and  
14 456 Readiness Assessment 2016 Summary Report. 2016.
- 15 457 32. Deribew A, Tessema GA, Deribe K, et al. Trends, causes, and risk factors of mortality among children  
16 458 under 5 in Ethiopia, 1990–2013: findings from the Global Burden of Disease Study 2013.  
17 459 *Population health metrics* 2016;**14**(1):42.
- 18 460 33. Berhanu D, Okwaraji YB, Belayneh AB, et al. Protocol for the evaluation of a complex intervention  
19 461 aiming at increased utilisation of primary child health services in Ethiopia: a before and after study  
20 462 in intervention and comparison areas. *BMC Health Services Research* 2020;**20**:1-12.
- 21 463 34. Ministry of Health (2020). Realizing Universal Health Coverage through Primary Health Care: A  
22 464 Roadmap for Optimizing the Ethiopian Health Extension Program 2020 – 2035. Addis Ababa,  
23 465 Ethiopia: Ministry of Health.
- 24 466 35. Wang, Huihui, Roman Tesfaye, Gandham N. V. Ramana, Chala Tesfaye Chekagn. 2016. Ethiopia Health  
25 467 Extension Program: An Institutionalized Community Approach for Universal Health Coverage.  
26 468 World Bank Studies. Washington, DC: World Bank.doi: 10.1596/978-1-4648-0815-9. License:  
27 469 Creative Commons Attribution CC BY3.0 IGO.
- 28 470 36. Berhanu D, Okwaraji YB, Defar A, et al. Does a complex intervention targeting communities, health  
29 471 facilities and district health managers increase the utilisation of community-based child health  
30 472 services? A before and after study in intervention and comparison areas of Ethiopia. *BMJ open*  
31 473 2020;**10**(9):e040868.
- 32 474 37. Schellenberg J, Persson LÅ, Defar A, et al. Endline evaluation of improved integrated community case  
33 475 management and community-based newborn care in Ethiopia: Ethiopian Public Health Institute  
34 476 & London School of Hygien and Tropical Medicine 2018.
- 35 477 38. Organization WH. Service availability and readiness assessment (SARA): an annual monitoring system  
36 478 for service delivery: reference manual: World Health Organization, 2013.
- 37 479 39. Hailemariam S, Gebeyehu Y, Loha E, et al. Inadequate management of pneumonia among children in  
38 480 South Ethiopia: findings from descriptive study. *BMC health services research* 2019;**19**(1):426.
- 39 481 40. Gage AD, Leslie HH, Bitton A, et al. Does quality influence utilization of primary health care? Evidence  
40 482 from Haiti. *Globalization and health* 2018;**14**(1):1-9.
- 41 483 41. Sousa Ad, Tiedje KE, Recht J, et al. Community case management of childhood illnesses: policy and  
42 484 implementation in Countdown to 2015 countries. *Bull World Health Organ* 2012;**90**:183–190.
- 43 485 42. Assefa Y, Gelaw YA, Hill PS, et al. Community health extension program of Ethiopia, 2003–2018:  
44 486 successes and challenges toward universal coverage for primary healthcare services. *Globalization  
45 487 and health* 2019;**15**(1):1-11.
- 46 488 43. Chandani Y, Noel M, Pomeroy A, et al. Factors affecting availability of essential medicines among  
47 489 community health workers in Ethiopia, Malawi, and Rwanda: solving the last mile puzzle. *The  
48 490 American journal of tropical medicine and hygiene* 2012;**87**(5 Suppl):120.
- 49 491 44. Ademe BW, Tebeje B, Molla A. Availability and utilization of medical devices in Jimma zone hospitals,  
50 492 Southwest Ethiopia: a case study. *BMC health services research* 2016;**16**(1):1-10.



- 1  
2  
3 493 45. Ukwaja KN, Aina OB, Talabi AA. Clinical overlap between malaria and pneumonia: can malaria rapid  
4 494 diagnostic test play a role? *The Journal of Infection in Developing Countries* 2011;**5**(03):199-203.
- 5 495 46. Kyabayinze DJ, Asimwe C, Nakanjako D, et al. Use of RDTs to improve malaria diagnosis and fever case  
6 496 management at primary health care facilities in Uganda. *Malaria journal* 2010;**9**(1):1-10.
- 7 497 47. Yeboah-Antwi K, Pilingana P, Macleod WB, et al. Community case management of fever due to malaria  
8 498 and pneumonia in children under five in Zambia: a cluster randomized controlled trial. *PLoS Med*  
9 499 2010;**7**(9):e1000340.
- 10 500 48. Ahinkorah BO, Budu E, Seidu A-A, et al. Barriers to healthcare access and healthcare seeking for  
11 501 childhood illnesses among childbearing women in sub-Saharan Africa: A multilevel modelling of  
12 502 Demographic and Health Surveys. *PLoS ONE* 16(2): e0244395 2021.
- 13 503 49. Fenta SM, Biresaw HB, Fentaw KD, et al. Determinants of full childhood immunization among children  
14 504 aged 12– 23 months in sub-Saharan Africa: a multilevel analysis using Demographic and Health  
15 505 Survey Data. *Tropical Medicine and Health* (2021) 49:29.
- 16 506 50. Miller NP, Bagheri Ardestani F, Wong H, et al. Barriers to the utilization of community-based child and  
17 507 newborn health services in Ethiopia: a scoping review. *Health Policy and Planning* 2021.
- 18 508 51. Sadruddin S, Khan luH, Bari A, et al. Effect of community mobilization on appropriate care seeking for  
19 509 pneumonia in Haripur, Pakistan. *Journal of Global Health* 2015;**5** (1).
- 20 510 52. Noordam AC, Sharkey AB, Hinssen P, et al. Association between caregivers' knowledge and care  
21 511 seeking behaviour for children with symptoms of pneumonia in six subSaharan African Countries.  
22 512 *BMC Health Services Research* (2017) 17:107
- 23 513 53. Tadesse T, Gelaw B, Haile Y, et al. Immunization service availability and readiness in primary health  
24 514 care in pastoral and semi-pastoral CGPP Ethiopia implementation districts. *Ethiopian Journal of*  
25 515 *Health Development* 2019;**33**.
- 26 516 54. Defar A, Alemu K, Tigabu Z, et al. Caregivers' and Health Extension Workers' Perceptions and  
27 517 Experiences of Outreach Management of Childhood Illnesses in Ethiopia: A Qualitative Study.  
28 518 *International journal of environmental research and public health* 2021;**18**(7):3816.
- 29 519 55. Daka DW, Wordofa MA, Woldie M, et al. Quality of clinical assessment and management of sick  
30 520 children by Health Extension Workers in four regions of Ethiopia: A cross-sectional survey. *PLoS*  
31 521 *ONE* 2020;**15**(9): e0239361.
- 32 522 56. Getachew T, Mekonnen S, Yitayal M, et al. Health Extension Workers' diagnostic accuracy for common  
33 523 childhood illnesses in four regions of Ethiopia: a cross-sectional study. *Acta Pædiatrica* 2019.
- 34 524 57. Stoop N, Hirvonen K, Maystadt J-F. Institutional mistrust and child vaccination coverage in Africa. *BMJ*  
35 525 *Global Health* 2021;**6**:e004595 doi:101136/bmjgh-2020-004595.
- 36 526 58. Getachew T, Abebe SM, Yitayal M, et al. Assessing the quality of care in sick child services at health  
37 527 facilities in Ethiopia. *BMC Health Services Research* 2020;**20**(1):1-12.
- 38 528 59. Tariku A, Berhane Y, Worku A, et al. Household wealth and utilization of preventive and treatment  
39 529 services for suspected childhood pneumonia in Ethiopia. *Submitted for publication at PLOS ONE*  
40 530 2021.
- 41 531 60. Tripathi A, Kabra S, Sachdev H, et al. Home visits by community health workers to improve  
42 532 identification of serious illness and care seeking in newborns and young infants from low-and  
43 533 middle-income countries. *Journal of Perinatology* 2016;**36**(1):S74-S82.
- 44  
45  
46  
47  
48  
49  
50 534  
51  
52 535  
53  
54  
55 536  
56  
57

## 537 **Acknowledgements**

538 We would like to forward our deepest gratitude to the study participants. Our special thanks to field  
539 assistants involved in the data collection process.

## 540 **Contributors**

541 AT, LÅP, YB, YO, AW and GAB contributed to the conceptualization of the study. AT analysed and  
542 interpreted the data and drafted the manuscript. LÅP, YB, YO, AW and GAB contributed to analysis and  
543 writing of the paper. All authors have read and approved the final manuscript.

## 544 **Funding**

545 The study was funded by a grant from the Bill and Melinda Gates Foundation (grant INV-009691) to the  
546 London School of Hygiene & Tropical Medicine. The funder had no role in data collection, analysis, or  
547 interpretation of results.

## 548 **Competing interests**

549 The authors declare that they have no conflict of interest.

## 550 **Patient consent for publication**

551 Not applicable

## 552 **Ethics approval**

553 The original study was approved by the Ethical Review Boards of the Ethiopian Public Health Institute  
554 (protocol number SERO-012-8-2016), the London School of Hygiene & Tropical Medicine (protocol  
555 number 11235), and the University of Gondar (V/P/RCS/05/559/2019). A written informed consent was  
556 obtained from each household respondent, caregiver of the index child and the health workers.

## 557 **Provenance and peer review**

558 Not commissioned; externally peer reviewed.

## 559 **Data availability statement**

1  
2  
3 560 The data for this manuscript were primarily collected by the Ethiopian Public Health Institute and London  
4  
5 561 School of Hygiene & Tropical Medicine. Interested researchers may contact the focal person, Dr Yemisrach  
6  
7 562 B. Okwaraji through email: Yemisrach.Okwaraji@lshtm.ac.uk. All requests will be reviewed by this  
8  
9 563 committee and if granted, data will be shared without any identifiers.

10  
11 564 **Figure legend**

12  
13 565 Figure 1 Percentage of health posts (n=165) with drugs and supplies to deliver pneumonia-related and  
14  
15 566 other sick child care services in four regions of Ethiopia, December 2018 to February 2019

16  
17 567 **Supplementary files**

18  
19 568 Supplementary file 1 Household survey questionnaire

20  
21 569 Supplementary file 2 Health post survey questionnaire

22  
23 570 Supplementary file 3 Health extension worker survey questionnaire

24  
25  
26 571  
27  
28  
29  
30  
31  
32  
33  
34  
35  
36  
37  
38  
39  
40  
41  
42  
43  
44  
45  
46  
47  
48  
49  
50  
51  
52  
53  
54  
55  
56  
57

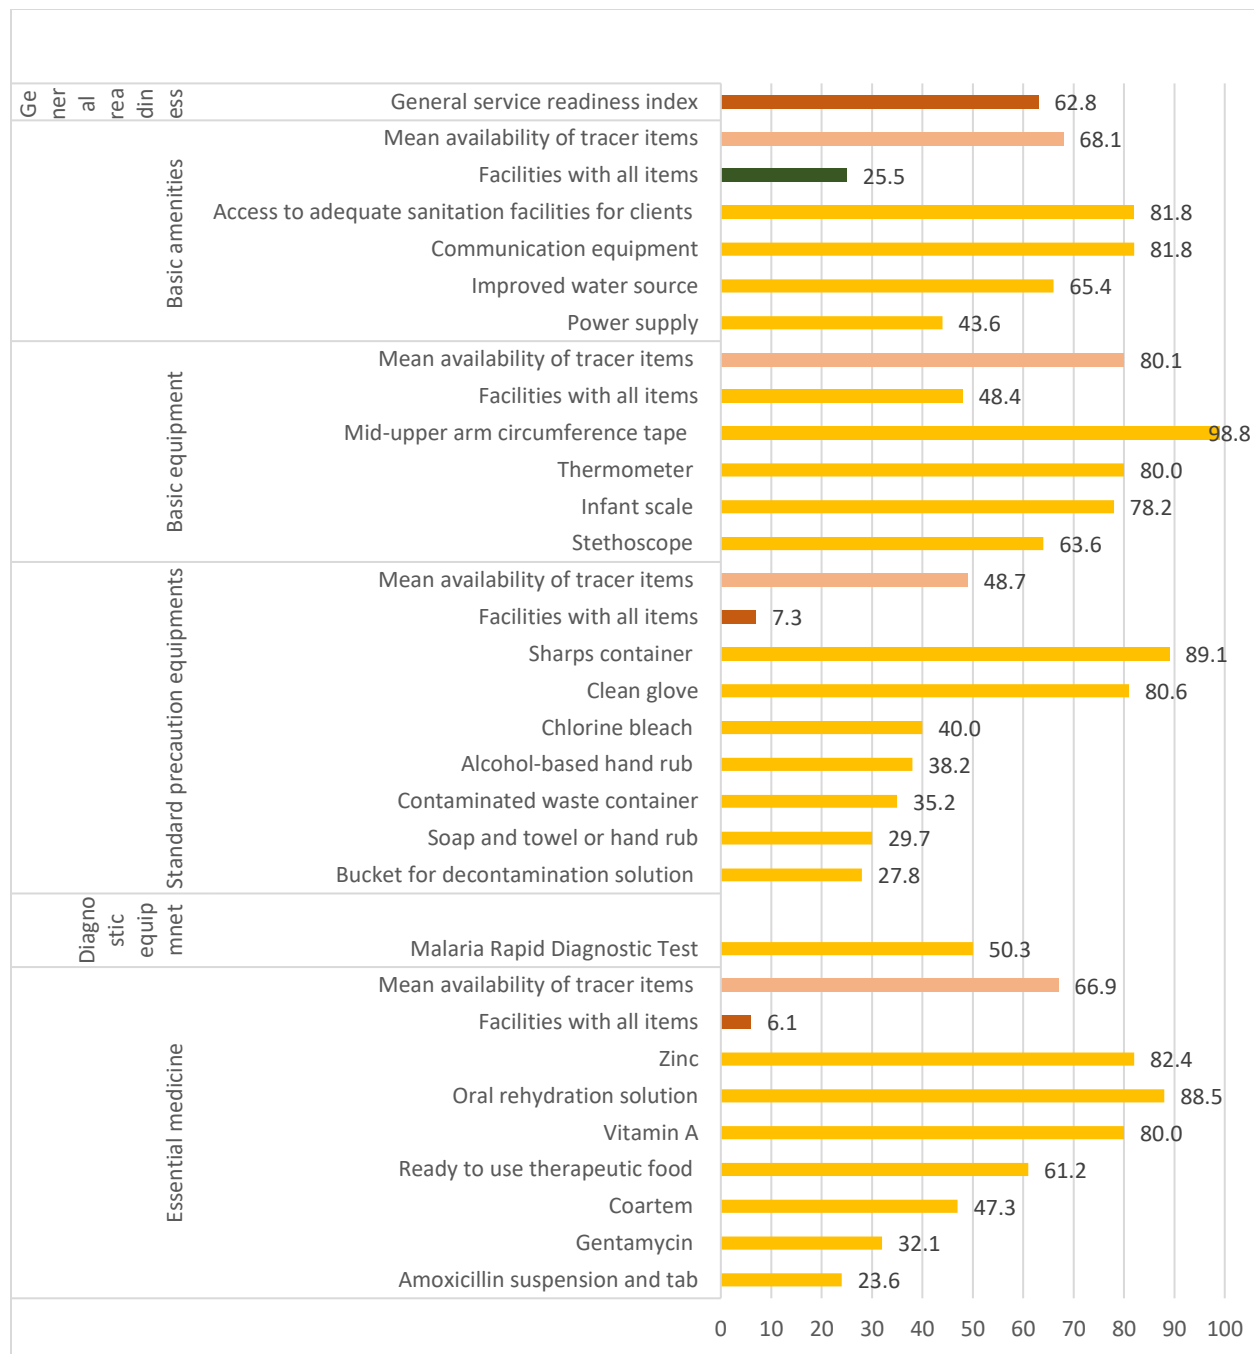

Figure 1 Percentage of health posts (n=165) with drugs and supplies to deliver pneumonia-related and other sick child care services in four regions of Ethiopia, December 2018 to February 2019

# Dagu End line Household Survey 2018

## Module 1 – Household

### Section 1.1: Household identifiers

|      |                                                             |                                                                                                |                                                                  |             |
|------|-------------------------------------------------------------|------------------------------------------------------------------------------------------------|------------------------------------------------------------------|-------------|
| 100h | Date (dd/mm/yyyy)                                           | __/__/__                                                                                       |                                                                  |             |
| 101h | Region                                                      | _____                                                                                          |                                                                  |             |
| 102h | Zone                                                        | _____                                                                                          |                                                                  |             |
| 103h | Woreda                                                      | _____                                                                                          |                                                                  |             |
| 105h | Kebele                                                      | _____                                                                                          |                                                                  |             |
| 106h | Gote                                                        | _____                                                                                          |                                                                  |             |
| 107h | Cluster Code                                                | _____                                                                                          |                                                                  |             |
| 108h | Household Code                                              | ---                                                                                            |                                                                  |             |
| 109h | Unique household ID<br>(cluster / household code)           | _____/____                                                                                     |                                                                  |             |
| 110h | GPS Latitude                                                | ____<br>DEG                                                                                    | ____<br>MIN                                                      | ____<br>SEC |
| 111h | GPS Longitude                                               | ____<br>DEG                                                                                    | ____<br>MIN                                                      | ____<br>SEC |
| 113h | Elevation                                                   | _____                                                                                          |                                                                  |             |
| 114h | Interviewer initials                                        | ---                                                                                            |                                                                  |             |
| 115h | <b>Interviewer:</b> Have you read him/her the consent form? | 1=Yes<br>2=No-one is available                                                                 | If the answer is No, fill the revisit form                       |             |
| 116h | <b>Interviewer:</b> Does the respondent agree?              | 1=Yes<br>2=No. END INTERVIEW                                                                   | If No Why? State the reason.                                     |             |
| 112h | Name of household head                                      | _____                                                                                          |                                                                  |             |
| 117h | What is the ethnic group of the household head?             | 01=Agew<br>02=Amhara<br>03=Konso<br>04=Burji<br>05=Kore<br>06=Gedeo<br>08=Derashe<br>09=Dawuro | 11=Konta<br>12=Ale<br>13=Oromo<br>15=Tigray<br>17=Other, Specify | _____       |

Household Listing with Household Head: Now I would like to ask you about people who are residents of this house. By resident, I mean everyone who has been present for the last 3 months and who normally eat together. *Start with head of the household and older people, then children from oldest to youngest.*

No. of Family members: **Including yourself how many family members do you have?** \_\_\_\_\_

| 118h_1<br>Unique ID | 118h_2<br>NAME | 118h_3<br>RELATIONSHIP                                                                                                                                                                                                                                                                    | 118h_4<br>SEX                                   | 118h_5<br>AGE                                        | 118h_E<br>Eligible | 118h_6<br>DATE OF BIRTH                     | 118h_7<br>MARITAL STATUS                                                                                                                               | 118h_8<br>RELIGION                                                                     | 118h_9<br>EDUCATION                                                                                                   | 118h_10-118h_15<br>ELIGIBILITY                                                                   |                                                              |                                                                                                           |
|---------------------|----------------|-------------------------------------------------------------------------------------------------------------------------------------------------------------------------------------------------------------------------------------------------------------------------------------------|-------------------------------------------------|------------------------------------------------------|--------------------|---------------------------------------------|--------------------------------------------------------------------------------------------------------------------------------------------------------|----------------------------------------------------------------------------------------|-----------------------------------------------------------------------------------------------------------------------|--------------------------------------------------------------------------------------------------|--------------------------------------------------------------|-----------------------------------------------------------------------------------------------------------|
|                     |                | What is the relationship of [Name] to the household head?<br>01=Head<br>02=Wife or husband<br>03=Son or daughter<br>04=In-law<br>05=Grandchild<br>06=Parent<br>08=Brother or sister<br>09=Niece or nephew<br>10=Adopted/stepchild<br>11=Other relative<br>12=Not related<br>99=Don't know | Is [Name] male or female?<br>1=Male<br>2=Female | How old is [Name]?<br>If less than 1 year write in 0 |                    | What is [Name] date of birth?<br>dd/mm/yyyy | For all born after 1966: Is [name] married?<br>1=Currently married<br>2= In a union<br>3=Not married or in a union<br>4=Divorced<br>5=Widowed<br>6=N/A | For all: What religion is [name]?<br>1=Orthodox<br>3=Protestant<br>4=Muslim<br>8=Other | How many years of formal education have they completed?<br><i>Enter number of formal years of education completed</i> | CHECK: Is the person a woman 13-49 years?<br>From 1969 to 2005 (Eth: 1961-1997)<br>1=Yes<br>2=No | CHECK: Is the person a child under 5 years?<br>1=Yes<br>2=No | CHECK: If the household has a child under 5 years, is this person the primary caregiver?<br>1=Yes<br>2=No |
| 01                  | ---            | ---                                                                                                                                                                                                                                                                                       | ---                                             | ---                                                  |                    | --/--/---                                   | ---                                                                                                                                                    | ---                                                                                    | ---                                                                                                                   | ---                                                                                              | ---                                                          | ---                                                                                                       |
| 02                  | ---            | ---                                                                                                                                                                                                                                                                                       | ---                                             | ---                                                  |                    | --/--/---                                   | ---                                                                                                                                                    | ---                                                                                    | ---                                                                                                                   | ---                                                                                              | ---                                                          | ---                                                                                                       |
| 03                  | ---            | ---                                                                                                                                                                                                                                                                                       | ---                                             | ---                                                  |                    | --/--/---                                   | ---                                                                                                                                                    | ---                                                                                    | ---                                                                                                                   | ---                                                                                              | ---                                                          | ---                                                                                                       |
| 04                  | ---            | ---                                                                                                                                                                                                                                                                                       | ---                                             | ---                                                  |                    | --/--/---                                   | ---                                                                                                                                                    | ---                                                                                    | ---                                                                                                                   | ---                                                                                              | ---                                                          | ---                                                                                                       |
| 05                  | ---            | ---                                                                                                                                                                                                                                                                                       | ---                                             | ---                                                  |                    | --/--/---                                   | ---                                                                                                                                                    | ---                                                                                    | ---                                                                                                                   | ---                                                                                              | ---                                                          | ---                                                                                                       |
| 06                  | ---            | ---                                                                                                                                                                                                                                                                                       | ---                                             | ---                                                  |                    | --/--/---                                   | ---                                                                                                                                                    | ---                                                                                    | ---                                                                                                                   | ---                                                                                              | ---                                                          | ---                                                                                                       |
| 07                  | ---            | ---                                                                                                                                                                                                                                                                                       | ---                                             | ---                                                  |                    | --/--/---                                   | ---                                                                                                                                                    | ---                                                                                    | ---                                                                                                                   | ---                                                                                              | ---                                                          | ---                                                                                                       |
| 08                  | ---            | ---                                                                                                                                                                                                                                                                                       | ---                                             | ---                                                  |                    | --/--/---                                   | ---                                                                                                                                                    | ---                                                                                    | ---                                                                                                                   | ---                                                                                              | ---                                                          | ---                                                                                                       |
| 09                  | ---            | ---                                                                                                                                                                                                                                                                                       | ---                                             | ---                                                  |                    | --/--/---                                   | ---                                                                                                                                                    | ---                                                                                    | ---                                                                                                                   | ---                                                                                              | ---                                                          | ---                                                                                                       |

| Section 1.2: Characteristics of house and assets                                                                         |                                                                                                         |                                                                                                                                                                                                                                   |   |
|--------------------------------------------------------------------------------------------------------------------------|---------------------------------------------------------------------------------------------------------|-----------------------------------------------------------------------------------------------------------------------------------------------------------------------------------------------------------------------------------|---|
| 119h                                                                                                                     | What is the main material of the roof?<br><i>Select one</i>                                             | 1 = Thatch/grass or leaves<br>2 = Iron sheets<br>8 = Other...specify                                                                                                                                                              | — |
| 120h                                                                                                                     | What is the main material of the walls?<br><i>Select one</i>                                            | 2 = Natural materials cane, wood, mud<br>4 = Stone with mud<br>5 = Stone with cement/bricks<br>8 = Other                                                                                                                          | — |
| 121h                                                                                                                     | What is the main floor material?<br><i>Select one</i>                                                   | 1 = Natural floor (earth/sand/dung)<br>2 = Rudimentary floor (wood/palm/bamboo)<br>3 = Finished floor (polished wood, cement, carpet)<br>8 = Other                                                                                | — |
| 122h                                                                                                                     | What kind of toilet facilities does your household have?                                                | 1= No facility/bush/field<br>2= Pit toilet/latrine<br>3= Ventilated improved pit latrine<br>8=Other                                                                                                                               | — |
| 123h                                                                                                                     | What is the main source of drinking water for members of your household?<br><br><i>Do Not read list</i> | 1=Piped water into dwelling<br>2=Piped water into compound<br>3=Public tap<br>4=Borehole in compound<br>6=Water from protected spring<br>8=Surface water (river/dam/lake etc)<br>9=Hand pump<br>10=Unprotected spring<br>88=Other | — |
| 124h                                                                                                                     | Do you do anything to the water to make it safer to drink?                                              | 1 = Yes<br>2 = No (SKIP TO 126)<br>3 = Don't know (SKIP TO 126)                                                                                                                                                                   | — |
| 125h                                                                                                                     | If Yes, what is the main thing you do?<br><br><i>Do Not read list</i>                                   | 1 = Let it stand and settle<br>2 = Strain through a cloth<br>3 = Use water filter (ceramic/sand/composite/etc)<br>4 = Boil<br>5 = Solar disinfection<br>6 = Add bleach/chlorine<br>8 = Other                                      | — |
| 126h                                                                                                                     | What type of fuel does your household mainly use for cooking?<br><i>Select one</i>                      | 1=Electricity<br>4=Charcoal<br>5=Firewood/straw<br>6=Dung<br>8=Other                                                                                                                                                              | — |
| 127h                                                                                                                     | Is the house connected to electricity?                                                                  | 1=Yes<br>2=No                                                                                                                                                                                                                     | — |
| <b>In total, how many the following items owned by residents of this household? Enter number of items (zero if None)</b> |                                                                                                         |                                                                                                                                                                                                                                   |   |
| 128h                                                                                                                     | How many <b>Wrist watch</b> ?                                                                           |                                                                                                                                                                                                                                   | — |
| 129h                                                                                                                     | How many <b>Gold (in grams)</b> ?                                                                       |                                                                                                                                                                                                                                   | — |
| 130h                                                                                                                     | How many <b>kerosene lamp/pressure lamps</b> ?                                                          |                                                                                                                                                                                                                                   | — |

|                                                                   |                                                                                                                                     |                                                                                                                                     |                           |
|-------------------------------------------------------------------|-------------------------------------------------------------------------------------------------------------------------------------|-------------------------------------------------------------------------------------------------------------------------------------|---------------------------|
| 131h                                                              | How many <b>Solar lamp</b> ?                                                                                                        |                                                                                                                                     | ___                       |
| 132h                                                              | How many <b>beds</b> ?                                                                                                              |                                                                                                                                     | ___                       |
| 134h                                                              | How many <b>Mobile phone</b> ?                                                                                                      |                                                                                                                                     | ___                       |
| 137h                                                              | How many <b>Radio</b> ?                                                                                                             |                                                                                                                                     | ___                       |
| 138h                                                              | How many <b>TV</b> ?                                                                                                                |                                                                                                                                     | ___                       |
| 142h                                                              | Do you own this house?                                                                                                              | 1 = Yes<br>2 = No                                                                                                                   | ___                       |
| 143h                                                              | Does any member of the household own any agricultural land?                                                                         | 1 = Yes<br>2 = No                                                                                                                   | <b>SKIP TO 145</b>        |
| 144h                                                              | How many hectares of agricultural land do members of this household own?                                                            | <i>Enter total number of hectares<br/>(If less than 1, Enter in decimals (example 0.5)<br/>Enter 9999 if hectares are Not known</i> |                           |
| 145h                                                              | Does this household own any livestock, herds, other farm animals, or poultry?                                                       | 1 = Yes<br>2 = No                                                                                                                   | <b>SKIP TO 155</b>        |
| <i>For each: Enter number. If None, enter 000</i>                 |                                                                                                                                     |                                                                                                                                     |                           |
| <b>How many of the following animals does this household own?</b> |                                                                                                                                     |                                                                                                                                     |                           |
| 146h                                                              | How many <b>chickens</b> ?                                                                                                          |                                                                                                                                     | ___                       |
| 147h                                                              | How many <b>goats</b> ?                                                                                                             |                                                                                                                                     | ___                       |
| 148h                                                              | How many <b>sheep</b> ?                                                                                                             |                                                                                                                                     | ___                       |
| 149h                                                              | How many <b>donkeys</b> ?                                                                                                           |                                                                                                                                     | ___                       |
| 150h                                                              | How many <b>horses</b> ?                                                                                                            |                                                                                                                                     | ___                       |
| 153h                                                              | How many <b>milk cows</b> ?                                                                                                         |                                                                                                                                     | ___                       |
| 154h                                                              | How many <b>ox (bulls)</b> ?                                                                                                        |                                                                                                                                     | ___                       |
| 155h                                                              | At any time in the past 12 months, has anyone come into your house to spray the interior walls of your dwelling against mosquitoes? | 1=Yes<br>2=No<br>9=Don't know                                                                                                       | <b>SKIP TO 158</b><br>___ |
| 156h                                                              | What type of residual spray was done? ( <i>Probe if indoor residual spraying (IRS)</i> )                                            | 1=IRS<br>8=Other<br>9=Don't know                                                                                                    | ___                       |
| 157h                                                              | How many months ago was the house last sprayed?                                                                                     | If less than one month write 00. If don't know write 99                                                                             | ___                       |
| 158h                                                              | How many mosquito nets does your household have?                                                                                    | Write total number Count those in use plus those Not in use. If don't know write 9 If "0" SKIP TO MODULE 2                          | ___                       |



| <b>Section 1.3: Household protection from malaria</b>                                         |                                                                                           |                                                                                                                                                                      |                        |               |               |
|-----------------------------------------------------------------------------------------------|-------------------------------------------------------------------------------------------|----------------------------------------------------------------------------------------------------------------------------------------------------------------------|------------------------|---------------|---------------|
| <i>Write total number of count those in use plus those Not in use (If don't know write 9)</i> |                                                                                           |                                                                                                                                                                      |                        |               |               |
|                                                                                               |                                                                                           |                                                                                                                                                                      | <b>Net #1</b>          | <b>Net #2</b> | <b>Net #3</b> |
| 159h                                                                                          | <i>Interviewer:</i> Is the Net 1 observed?                                                | 1=Yes<br>2=No                                                                                                                                                        | —                      | —             | —             |
| 160h                                                                                          | How many months ago did your household obtain the mosquito Net1?                          | Estimate the number of months ago each net was obtained. If don't know 99                                                                                            | —                      | —             | —             |
| 161h                                                                                          | Where did your household get the mosquito Net1 from?                                      | 1=Gov. hospital or health centre<br>2=Private hospital or health centre<br>3=HEW/HDA<br>5=Bought from shop/open market<br>7=Mass campaign<br>8=Other<br>9=Don't know | —                      | —             | —             |
| 162h                                                                                          | What kind of Net 1 is it?                                                                 | 1= Long-lasting net <b>SKIP TO 166</b><br>2=Factory net<br>8=Other<br>9=Don't know                                                                                   | —                      | —             | —             |
| 163h                                                                                          | When you got Net 1 was it already treated with an insecticide to kill or repel mosquitos? | 1=Yes<br>2=No<br>9=Don't know                                                                                                                                        | —                      | —             | —             |
| 164h                                                                                          | Did anyone sleep under the mosquito Net 1 last night?                                     | 1=Yes<br>2=No <b>If 2 or 9 then, SKIP TO 166</b><br>9=Don't know                                                                                                     | —                      | —             | —             |
| 165h                                                                                          | Who slept under any of the nets last night?                                               | <i>(record the Person ID from household listing)</i>                                                                                                                 | <i>Enter Person ID</i> |               |               |
|                                                                                               |                                                                                           |                                                                                                                                                                      | —                      | —             | —             |
|                                                                                               |                                                                                           |                                                                                                                                                                      | —                      | —             | —             |
|                                                                                               |                                                                                           |                                                                                                                                                                      | —                      | —             | —             |
| 159h 2                                                                                        | <i>Interviewer:</i> Is the Net 2 observed?                                                | 1=Yes<br>2=No                                                                                                                                                        | —                      | —             | —             |
| 160h 2                                                                                        | How many months ago did your household obtain the mosquito Net2                           | <i>Estimate the number of months ago each net was obtained. If don't know 99</i>                                                                                     | —                      | —             | —             |
| 161h 2                                                                                        | Where did your household get the mosquito Net2 from?                                      | 1=Gov. hospital or health centre<br>2=Private hospital or health centre<br>3=HEW/HDA<br>5=Bought from shop/open market<br>7=Mass campaign<br>8=Other<br>9=Don't know | —                      | —             | —             |
| 162 h2                                                                                        | What kind of Net 2 is it?                                                                 | 1= Long-lasting net <b>SKIP TO 166</b><br>2=Factory net<br>8=Other<br>9=Don't know                                                                                   | —                      | —             | —             |
| 163h 2                                                                                        | When you got Net 2 was it already treated with an insecticide to kill or repel mosquitos? | 1=Yes<br>2=No<br>9=Don't know                                                                                                                                        | —                      | —             | —             |
| 164h 2                                                                                        | Did anyone sleep                                                                          | 1=Yes                                                                                                                                                                | —                      | —             | —             |

|        |                                                                                           |                                                                                                                                                                      |                 |     |     |
|--------|-------------------------------------------------------------------------------------------|----------------------------------------------------------------------------------------------------------------------------------------------------------------------|-----------------|-----|-----|
|        | under the mosquito Net 2 last night?                                                      | 2=No <b>If 2 or 9 then, SKIP TO 166</b><br>9=Don't know                                                                                                              |                 |     |     |
| 165h 2 | Who slept under any of nets                                                               | (Record the Person ID from household listing)                                                                                                                        | Enter Person ID |     |     |
|        |                                                                                           |                                                                                                                                                                      | ___             | ___ | ___ |
|        |                                                                                           |                                                                                                                                                                      | ___             | ___ | ___ |
|        |                                                                                           |                                                                                                                                                                      | ___             | ___ | ___ |
| 159h 3 | <b>Interviewer:</b> Is the Net 3 observed                                                 | 1=Yes<br>2=No                                                                                                                                                        | —               | —   | —   |
| 160h 3 | How many months ago did your household obtain the mosquito Net3?                          | Estimate the number of months ago each net was obtained. If don't know 99                                                                                            | —               | —   | —   |
| 161h 3 | Where did your household get the mosquito Net3 from?                                      | 1=Gov. hospital or health centre<br>2=Private hospital or health centre<br>3=HEW/HDA<br>5=Bought from shop/open market<br>7=Mass campaign<br>8=Other<br>9=Don't know | —               | —   | —   |
| 162h 3 | What kind of Net 3 is it?                                                                 | 1= Long-lasting net ( <b>SKIP TO 166</b> )<br>2=Factory net<br>8=Other<br>9=Don't know                                                                               | —               | —   | —   |
| 163h 3 | When you got Net 3 was it already treated with an insecticide to kill or repel mosquitos? | 1=Yes<br>2=No<br>9=Don't know                                                                                                                                        | —               | —   | —   |
| 164h 3 | Did anyone sleep under the mosquito Net 3 last night?                                     | 1=Yes<br>2=No <b>If 2 or 9 then, SKIP TO 166</b><br>9=Don't know                                                                                                     | —               | —   | —   |
| 165h 3 | Who slept under this mosquito Net 3 last night                                            | (record the Person ID from household listing)                                                                                                                        | Enter Person ID |     |     |
|        |                                                                                           |                                                                                                                                                                      | ___             | ___ | ___ |
|        |                                                                                           |                                                                                                                                                                      | ___             | ___ | ___ |
|        |                                                                                           |                                                                                                                                                                      | ___             | ___ | ___ |

## Module 2 – Woman aged 13-49 years

### Section 2.1: Identification and consent of eligible women

|                                                                                                                                                          |                                                  |                                                                  |       |
|----------------------------------------------------------------------------------------------------------------------------------------------------------|--------------------------------------------------|------------------------------------------------------------------|-------|
| 166h                                                                                                                                                     | Name of women                                    |                                                                  | _____ |
| 167h                                                                                                                                                     | Woman ID                                         |                                                                  | _____ |
| 168h                                                                                                                                                     | Is it possible to interview the woman?           | 1=Yes <b>SKIP TO 170</b><br>2=No                                 | —     |
| 169h                                                                                                                                                     | If No, why Not possible to interview the woman?  | 1=Travelled away<br>2=Sick<br>3=Other<br>4=Currently Not present | —     |
| 170h                                                                                                                                                     | Interviewer: Have you read her the consent form? | 1=Yes<br>2= No                                                   | —     |
| 171h                                                                                                                                                     | Does she give her consent to be interviewed?     | 1=Yes<br>2=No <b>SKIP TO 179</b>                                 | —     |
| <i>Thank you for agreeing to participate in this interview. I would like to first ask you about your involvement in the women development army (WDA)</i> |                                                  |                                                                  |       |
| 172h                                                                                                                                                     | Do you participate in WDA?                       | 1=Yes<br>2=No <b>SKIP TO 175</b>                                 | —     |
| 173h                                                                                                                                                     | Are you a 1 to 5 WDA leader?                     | 1=Yes<br>2=No                                                    | —     |
| 174h                                                                                                                                                     | Are you a 1 to 30 WDA team leader?               | 1=Yes<br>2=No                                                    | —     |

### Section 2.2: Pregnancy history

|                                                                                                                                                                                                                                                                       |                                                                     |                                          |   |
|-----------------------------------------------------------------------------------------------------------------------------------------------------------------------------------------------------------------------------------------------------------------------|---------------------------------------------------------------------|------------------------------------------|---|
| 175h                                                                                                                                                                                                                                                                  | Are you pregnant Now?                                               | 1=Yes<br>2=No<br>8=Unsure                | — |
| 176h                                                                                                                                                                                                                                                                  | Have you ever been pregnant before?                                 | 1 = Yes<br>2 = No <b>(End Interview)</b> | — |
| 177h                                                                                                                                                                                                                                                                  | Have you ever given birth to a child?                               | 1 = Yes<br>2 = No                        | — |
| 178h                                                                                                                                                                                                                                                                  | How many children have you given birth to in total?                 | Enter number                             | — |
| <i>I understand that it is not easy to talk about children who have died, or pregnancies that did not end up not in live birth, but it is important that you tell us about all of them, so that the government can develop programs to improve children's health.</i> |                                                                     |                                          |   |
| 179h                                                                                                                                                                                                                                                                  | Have you ever had a pregnancy that's lost before full term?         | 1=Yes<br>2=No <b>SKIP TO 181</b>         | — |
| 180h                                                                                                                                                                                                                                                                  | How many pregnancies have you had that did Not end in a live birth? | Enter number                             | — |
| <i>Now would like to ask about the information regarding pregnancies beginning of 2009 (Ethiopian calendar).</i>                                                                                                                                                      |                                                                     |                                          |   |
| 181h                                                                                                                                                                                                                                                                  | Were you pregnant at the time of 2009 or any time afterwards?       | 1 = Yes<br>2 = No <b>(End interview)</b> | — |

Now I would like to record your births since 2009 (Ethiopian Calendar), whether still alive or not, starting with THE MOST RECENT ONE. *Record twins and triplets on separate lines.*

No\_of\_Preg. How many times were you pregnant at the time of 2009 or any time afterwards?

Is your younger child 2 or under 2 years of age?

| 167h<br>Woman<br>ID | 181h_a<br>Pregnancy<br>ID | 181h_b<br>Outcome of<br>pregnancy                                                                         | 181h_c<br>Baby's name                                | 181h_d<br>Date of birth/<br>Pregnancy ended                                            | 181h_e<br>Born as a<br>twin?      | 181h_f<br>Sex                      | 181h_g<br>Still alive? | 181h_h<br>If still alive, how old<br>in months?      | 181h_i<br>If the child died, when<br>did s/he die?                                    |
|---------------------|---------------------------|-----------------------------------------------------------------------------------------------------------|------------------------------------------------------|----------------------------------------------------------------------------------------|-----------------------------------|------------------------------------|------------------------|------------------------------------------------------|---------------------------------------------------------------------------------------|
|                     |                           | 1=Live birth<br>2=Baby born dead,<br><b>Skip to 181</b><br>3=Lost before full-<br>term <b>Skip to 181</b> | <i>Enter "Not<br/>given" if Not<br/>given a name</i> | <i>Enter 01 for day if<br/>Not known.<br/>Probe for months/<br/>years if Not known</i> | 1 = Yes<br>2 = No<br>3=Don't know | 1=Male<br>2=Female<br>3=Don't know | 1=Yes<br>2=No          | <i>If less than 28 days<br/>enter number of days</i> | <i>Enter 01 for day if Not<br/>known.<br/>Probe for months/years if<br/>Not known</i> |
|                     | 1                         | —                                                                                                         | —                                                    | DD/MM/ YYYY                                                                            | —                                 | —                                  | —                      | DD/MM                                                | DD/MM/ YYYY                                                                           |
|                     | 2                         | —                                                                                                         | —                                                    | DD/MM/ YYYY                                                                            | —                                 | —                                  | —                      | DD/MM                                                | DD/MM/ YYYY                                                                           |
|                     | 3                         | —                                                                                                         | —                                                    | DD/MM/ YYYY                                                                            | —                                 | —                                  | —                      | DD/MM                                                | DD/MM/ YYYY                                                                           |
|                     | 4                         | —                                                                                                         | —                                                    | DD/MM/ YYYY                                                                            | —                                 | —                                  | —                      | DD/MM                                                | DD/MM/ YYYY                                                                           |
|                     | 5                         | —                                                                                                         | —                                                    | DD/MM/ YYYY                                                                            | —                                 | —                                  | —                      | DD/MM                                                | DD/MM/ YYYY                                                                           |
|                     | 6                         | —                                                                                                         | —                                                    | DD/MM/ YYYY                                                                            | —                                 | —                                  | —                      | DD/MM                                                | DD/MM/ YYYY                                                                           |

1  
2  
3  
4

| <b>Section 2.3: Pregnancy care for last birth (in the last two years.</b>                                               |                                                                                                                                                                    |                                                                                                 |                    |
|-------------------------------------------------------------------------------------------------------------------------|--------------------------------------------------------------------------------------------------------------------------------------------------------------------|-------------------------------------------------------------------------------------------------|--------------------|
| <i>Now I want to talk to you about the last birth you had that ended in [DATE], with the birth of [NAME]</i>            |                                                                                                                                                                    |                                                                                                 |                    |
| 182h                                                                                                                    | Do you have a family health card with information about that pregnancy and birth?                                                                                  | 1=Yes<br>2=No                                                                                   | <b>SKIP TO 184</b> |
| 183h                                                                                                                    | May I see your family health card?                                                                                                                                 | 1=Yes<br>2=No because it isn't at home<br>3=No, refused permission                              | —                  |
| 184h                                                                                                                    | When pregnant with [NAME], did you receive any care during pregnancy? ( <i>Probe: by care I mean any care from HEW, HW, nurses, midwives or doctors, clinics</i> ) | 1=Yes<br>2=No                                                                                   | <b>SKIP TO 236</b> |
| 185h_a                                                                                                                  | Where did you go for pregnancy care?<br><b>At home</b>                                                                                                             | 1=Yes<br>2=No                                                                                   | —                  |
| 185h_b                                                                                                                  | Where did you go for pregnancy care?<br><b>At Health Post</b>                                                                                                      | 1=Yes<br>2=No                                                                                   | —                  |
| 185h_c                                                                                                                  | Where did you go for pregnancy care?<br><b>At Health Centre</b>                                                                                                    | 1=Yes<br>2=No                                                                                   | —                  |
| 185h_d                                                                                                                  | Where did you go for pregnancy care?<br><b>At Hospital</b>                                                                                                         | 1=Yes<br>2=No                                                                                   | —                  |
| 185h_e                                                                                                                  | Where did you go for pregnancy care?<br><b>Other</b>                                                                                                               | 1=Yes<br>2=No                                                                                   | —                  |
| <b><i>For women who received pregnancy care at a hospital, health center or health post</i></b>                         |                                                                                                                                                                    |                                                                                                 |                    |
| 186h                                                                                                                    | How many times did you attend the hospital for pregnancy (antenatal) care for that pregnancy?                                                                      | Enter the number of times<br>If the answer is "0" Skip to 190                                   | —                  |
| 188h                                                                                                                    | How old was your pregnancy at the first visit?                                                                                                                     | <i>Record No. of weeks. If don't know 99. Record from FHC/ANC appointment card if available</i> | —                  |
| 190h                                                                                                                    | How many times did you attend the health center for pregnancy (antenatal) care for that pregnancy?                                                                 | Enter the number of times<br>If the answer is "0" Skip to 194                                   | —                  |
| 192h                                                                                                                    | How old was your pregnancy at the first visit?                                                                                                                     | <i>Record No. of weeks. If don't know 99. Record from FHC/ANC appointment card if available</i> | —                  |
| 194h                                                                                                                    | How many times did you attend the health post for pregnancy (antenatal) care for that pregnancy?                                                                   | Enter the number of times<br>If the answer is "0" Skip to 199                                   | —                  |
| 196h                                                                                                                    | How old was your pregnancy at the first visit?                                                                                                                     | <i>Record No. of weeks. If don't know 99. Record from FHC/ANC appointment card if available</i> | —                  |
| <b><i>For women who receive pregnancy care at home</i></b>                                                              |                                                                                                                                                                    |                                                                                                 |                    |
| 199h                                                                                                                    | How many times did the HEW visit you at home for pregnancy care that pregnancy?                                                                                    | Enter number of times<br>If answer is "0" Skip to 201                                           | —                  |
| 200h                                                                                                                    | How old was your pregnancy at the first HEW visit?                                                                                                                 | <i>Record No. of weeks. If don't know 99. Record from FHC/ANC appointment card if available</i> | —                  |
| <b><i>Now I want to ask you about the pregnancy care you received (Verify with family health card if available)</i></b> |                                                                                                                                                                    |                                                                                                 |                    |
| 201h                                                                                                                    | Was your weight measured?                                                                                                                                          | 1=Yes<br>2=No                                                                                   | <b>SKIP TO 203</b> |
| 202h                                                                                                                    | In which location was this service first provided?                                                                                                                 | 1=Home by HEW<br>2=Health Post<br>3=Health Centre<br>4=Hospital<br>8=Other                      | —                  |
| 203h                                                                                                                    | Was your height measured?                                                                                                                                          | 1=Yes<br>2=No                                                                                   | <b>SKIP TO 205</b> |
| 204h                                                                                                                    | In which location was this service first provided?                                                                                                                 | 1=Home by HEW<br>2=Health Post<br>3=Health Centre                                               | —                  |

1  
2  
3  
4  
5  
6  
7  
8  
9  
10  
11  
12  
13  
14  
15  
16  
17  
18  
19  
20  
21  
22  
23  
24  
25  
26  
27  
28  
29  
30  
31  
32  
33  
34  
35  
36  
37  
38  
39  
40  
41  
42  
43  
44  
45  
46  
47  
48  
49  
50  
51  
52  
53  
54  
55  
56  
57  
58  
59  
60

|      |                                                                                                                      |                                                                                             |                  |
|------|----------------------------------------------------------------------------------------------------------------------|---------------------------------------------------------------------------------------------|------------------|
|      |                                                                                                                      | 4=Hospital<br>8=Other                                                                       |                  |
| 205h | Did you receive information about breastfeeding?                                                                     | 1=Yes<br>2=No                                                                               | SKIP TO 207<br>— |
| 206h | In which location was this service first provided?                                                                   | 1=Home by WDA<br>2=Home by HEW<br>3=Health post<br>4=Health center<br>5=Hospital<br>8=Other | —                |
| 207h | Was your blood pressure measured?<br><i>(Probe: when a strap was put around your upper arm and a measure taken).</i> | 1=Yes<br>2=No                                                                               | SKIP TO 209<br>— |
| 208h | In which location was this service first provided?                                                                   | 1=Home by HEW<br>2=Health post<br>3=Health center<br>4=hospital<br>8=other                  | —                |
| 209h | Did you give a urine sample for a test?                                                                              | 1=Yes<br>2=No                                                                               | SKIP TO 211<br>— |
| 210h | In which location was this service provided?                                                                         | 1=Home by HEW<br>2=Health post<br>3=Health center<br>4=Hospital<br>8=other                  | —                |
| 211h | Did you give blood for any test for syphilis?                                                                        | 1=Yes<br>2=No                                                                               | SKIP TO 213<br>— |
| 212h | In which location was this service provided?                                                                         | 1=Home by HEW<br>2=Health Post<br>3=Health Centre<br>4=Hospital<br>8=Other                  | —                |
| 213h | Did you receive iron folate tablets or iron syrup?                                                                   | 1=Yes<br>2=No                                                                               | SKIP TO 216<br>— |
| 214h | In which location was this service provided?                                                                         | 1=Home by HEW<br>2=Health post<br>3=Health Centre<br>4=Hospital<br>8=other                  | —                |
| 215h | For how many days did you take the tablets or syrup?                                                                 | Enter number of days<br>Enter 999 if Not known                                              | —                |
| 216h | Were you given an injection in the arm to prevent the baby from getting tetanus, that is, convulsions after birth?   | 1=Yes<br>2=No                                                                               | SKIP TO 222<br>— |
| 217h | If Yes: How many times did you get a tetanus injection?                                                              | Write number of times                                                                       | —                |
| 218h | If less than 2 times: <b>At any time before this pregnancy did you receive any tetanus injections?</b>               | 1=Yes<br>2=No                                                                               | SKIP TO 221<br>— |
| 221h | In which health facility was tetanus injection given?                                                                | 1=Home by HEW<br>2=Health post<br>3=Health Centre<br>4=Hospital<br>8=Other                  | —                |
| 222h | Did you receive HIV information?                                                                                     | 1=Yes<br>2=No                                                                               | SKIP TO 224<br>— |

1  
2

|                                        |                                                                                      |                                                                                                                                                          |                                                                                             |                         |
|----------------------------------------|--------------------------------------------------------------------------------------|----------------------------------------------------------------------------------------------------------------------------------------------------------|---------------------------------------------------------------------------------------------|-------------------------|
| 3<br>4<br>5<br>6<br>7<br>8<br>9        | 223h                                                                                 | In which location was this service first provided?                                                                                                       | 1=Home by WDA<br>2=Home by HEW<br>3=Health post<br>4=Health Centre<br>5=Hospital<br>8=other | —                       |
| 10                                     | 224h                                                                                 | Did you receive STI testing?                                                                                                                             | 1=Yes<br>2=No                                                                               | <b>SKIP TO 226</b><br>— |
| 11<br>12<br>13<br>14                   | 225h                                                                                 | In which location was this service provided?                                                                                                             | 1=Health Centre<br>2=Hospital<br>8=Other                                                    | —                       |
| 15<br>16                               | 226h                                                                                 | Did you receive any STI treatment?                                                                                                                       | 1=Yes<br>2=No                                                                               | <b>SKIP TO 228</b><br>— |
| 17<br>18<br>19                         | 227h                                                                                 | In which location was this service provided?                                                                                                             | 1=Health center<br>2=Hospital<br>8=Other                                                    | —                       |
| 20<br>21                               | 228h                                                                                 | Did you receive information on nutrition?                                                                                                                | 1=Yes<br>2=No                                                                               | <b>SKIP TO 230</b><br>— |
| 22<br>23<br>24<br>25<br>26<br>27<br>28 | 229h                                                                                 | In which location was this service first provided?                                                                                                       | 1=Home by WDA<br>2=Home by HEW<br>3=Health post<br>4=Health Centre<br>5=Hospital<br>8=Other | —                       |
| 29<br>30                               | 230h                                                                                 | Did you receive information on pregnancy danger signs?                                                                                                   | 1=Yes<br>2=No                                                                               | <b>SKIP TO 232</b><br>— |
| 31<br>32<br>33<br>34<br>35<br>36       | 231h                                                                                 | In which location was this service first provided?                                                                                                       | 1=Home by WDA<br>2=Home by HEW<br>3=Health post<br>4=Health Centre<br>5=Hospital<br>8=Other | —                       |
| 37<br>38<br>39                         | 232h                                                                                 | Were you advised on birth preparedness and complication readiness? <i>Probe: for finances, for help during delivery, for transport, for emergencies?</i> | 1=Yes<br>2=No                                                                               | <b>SKIP TO 236</b><br>— |
| 40<br>41<br>42<br>43<br>44<br>45<br>46 | 233h                                                                                 | In which location was this service first provided?                                                                                                       | 1=Home by WDA<br>2=Home by HEW<br>3=Health post<br>4=Health Centre<br>5=Hospital<br>8=Other | —                       |
| 47<br>48                               | 234h                                                                                 | <b>Was your birth preparedness and complication readiness plan recorded?</b>                                                                             | 1=Yes<br>2=No                                                                               | <b>SKIP TO 236</b><br>— |
| 49<br>50<br>51<br>52<br>53<br>54       | 235h                                                                                 | <b>In which location was this service provided?</b>                                                                                                      | 1=Home by WDA<br>2=Home by HEW<br>3=Health post<br>4=Health Centre<br>5=Hospital<br>8=Other | —                       |
| 55                                     | <b>Do Not read out list, prompt, 'anything else' record 1=Yes for all that apply</b> |                                                                                                                                                          |                                                                                             |                         |
| 56<br>57<br>58                         | 236h                                                                                 | Can you tell me what are problems in pregnancy might need medical treatment? <b>Severe headache</b>                                                      | 1=Yes<br>2= No                                                                              | —                       |
| 59<br>60                               | 237h                                                                                 | Can you tell me what are problems in pregnancy might need                                                                                                | 1=Yes                                                                                       | —                       |

1  
2  
3  
4  
5  
6  
7  
8  
9  
10  
11  
12  
13  
14  
15  
16  
17  
18  
19  
20  
21  
22  
23  
24  
25  
26  
27  
28  
29  
30  
31  
32  
33  
34  
35  
36  
37  
38  
39  
40  
41  
42  
43  
44  
45  
46  
47  
48  
49  
50  
51  
52  
53  
54  
55  
56  
57  
58  
59  
60

|      |                                                                                                                                                           |                                                                                        |   |
|------|-----------------------------------------------------------------------------------------------------------------------------------------------------------|----------------------------------------------------------------------------------------|---|
|      | medical treatment? <b>Blurry vision</b>                                                                                                                   | 2= No                                                                                  |   |
| 238h | Can you tell me what are problems in pregnancy might need medical treatment?<br><b>Reduced or absent fetal movement</b>                                   | 1=Yes<br>2= No                                                                         | — |
| 239h | Can you tell me what are problems in pregnancy might need medical treatment? <b>High blood pressure</b>                                                   | 1=Yes<br>2= No                                                                         | — |
| 240h | Can you tell me what are problems in pregnancy might need medical treatment?<br><b>Edema of the face/hands (i.e. swelling)</b>                            | 1=Yes<br>2= No                                                                         | — |
| 241h | Can you tell me what are problems in pregnancy might need medical treatment? <b>Convulsions</b>                                                           | 1=Yes<br>2= No                                                                         | — |
| 242h | Can you tell me what are problems in pregnancy might need medical treatment?<br><b>Excessive vaginal bleeding</b>                                         | 1=Yes<br>2= No                                                                         | — |
| 243h | Can you tell me what are problems in pregnancy might need medical treatment?<br><b>Severe lower abdominal pain</b>                                        | 1=Yes<br>2= No                                                                         | — |
| 244h | Can you tell me what are problems in pregnancy might need medical treatment? <b>Fever</b>                                                                 | 1=Yes<br>2= No                                                                         | — |
| 245h | Can you tell me what are problems in pregnancy might need medical treatment? <b>Anemia</b>                                                                | 1=Yes<br>2= No                                                                         | — |
| 246h | Can you tell me what are problems in pregnancy might need medical treatment? <b>Other</b>                                                                 | Specify                                                                                | — |
| 247h | Were you told where to go if you had any complications?                                                                                                   | 1=Yes<br>2= No                                                                         | — |
|      |                                                                                                                                                           | <b>SKIP TO 249</b>                                                                     |   |
| 248h | If Yes, where were you told to go?                                                                                                                        | 1= Health post<br>2= Health Centre<br>3= Hospital<br>8=Other (specify)<br>9=Don't know | — |
| 249h | During your last pregnancy did you make any preparations for your delivery? <i>Probe: for finances, for help during delivery, transport, emergencies?</i> | 1=Yes<br>2= No                                                                         | — |
|      | <b>Do Not read out list, prompt, 'anything else' record 1=Yes for all that apply</b>                                                                      |                                                                                        |   |
| 250h | What preparations did you make for the delivery?<br><b>Financial</b>                                                                                      | 1=Yes<br>2= No                                                                         | — |
| 251h | What preparations did you make for the delivery?<br><b>Transport</b>                                                                                      | 1=Yes<br>2= No                                                                         | — |
| 252h | What preparations did you make for the delivery?<br><b>Food</b>                                                                                           | 1=Yes<br>2= No                                                                         | — |
| 253h | What preparations did you make for the delivery?<br><b>Identification of birth attendant</b>                                                              | 1=Yes<br>2= No                                                                         | — |
| 254h | What preparations did you make for the delivery?<br><b>Identification of facility</b>                                                                     | 1=Yes<br>2= No                                                                         | — |
| 255h | What preparations did you make for the delivery?<br><b>Clean clothes</b>                                                                                  | 1=Yes<br>2= No                                                                         | — |
| 256h | What preparations did you make for the delivery?                                                                                                          | 1=Yes<br>2= No                                                                         | — |



1  
2  
3  
4  
5  
6  
7  
8  
9  
10  
11  
12  
13

|      |                                                                         |                |   |
|------|-------------------------------------------------------------------------|----------------|---|
|      | <b>Cover to deliver on</b>                                              |                |   |
| 257h | What preparations did you make for the delivery?<br><b>Gloves</b>       | 1=Yes<br>2= No | — |
| 258h | What preparations did you make for the delivery?<br><b>Cotton gauze</b> | 1=Yes<br>2= No | — |
| 259h | What preparations did you make for the delivery?<br><b>Other</b>        | Specify        | — |

## Section 2.4 Delivery for last birth

|                   |                                                                                                                                                                                            |                                                                                                                                                  |                    |   |
|-------------------|--------------------------------------------------------------------------------------------------------------------------------------------------------------------------------------------|--------------------------------------------------------------------------------------------------------------------------------------------------|--------------------|---|
| 260h              | Who assisted with the delivery?                                                                                                                                                            | 1=Doctor<br>2=Nurse/Midwife<br>3=Health Extension Worker<br>4=Traditional Birth Attendant<br>5=Relative/friend<br>6=No-one<br>8= Other (specify) | <b>SKIP TO 263</b> | — |
| 261h              | When you gave birth, did the person assisting you wear gloves during delivery?                                                                                                             | 1=Yes<br>2= No<br>9=Don't know                                                                                                                   |                    | — |
| 262h              | When you gave birth, did the person assisting you wash her hands before the delivery?                                                                                                      | 1=Yes<br>2= No<br>9=Don't know                                                                                                                   |                    | — |
| 263h              | Where did you give birth?                                                                                                                                                                  | 1=Home<br>2=Health post<br>3=Health Centre<br>4=Hospital<br>8=Other                                                                              | <b>SKIP TO 266</b> | — |
| 264h              | If health post/health centre/hospital: After giving birth, for how many days did you stay at the health post/health Centre/hospital in total?                                              | Enter number of days, enter 0 if she left on the same day as delivery                                                                            |                    | — |
| 265h              | Was [NAME] delivered by caesarean, that is, did they cut your belly open to take the baby out?                                                                                             | 1=Yes<br>2= No                                                                                                                                   |                    | — |
| Read out the list |                                                                                                                                                                                            |                                                                                                                                                  |                    |   |
| 266h              | During the delivery of [NAME] did you experience any of the following? <b>Heavy bleeding</b>                                                                                               | 1=Yes<br>2= No                                                                                                                                   |                    | — |
| 267h              | During the delivery of [NAME] did you experience any of the following? <b>Labour more than 12 hours</b>                                                                                    | 1=Yes<br>2= No                                                                                                                                   |                    | — |
| 268h              | During the delivery of [NAME] did you experience any of the following? <b>Loss of consciousness</b>                                                                                        | 1=Yes<br>2= No                                                                                                                                   |                    | — |
| 269h              | During the delivery of [NAME] did you experience any of the following? <b>Premature labour</b>                                                                                             | 1=Yes<br>2= No                                                                                                                                   |                    | — |
| 270h              | During the delivery of [NAME] did you experience any of the following? <b>Foul discharge</b>                                                                                               | 1=Yes<br>2= No                                                                                                                                   |                    | — |
| 271h              | During the delivery of [NAME] did you experience any of the following? <b>Baby in abnormal position</b>                                                                                    | 1=Yes<br>2= No                                                                                                                                   |                    | — |
| 272h              | During delivery were you advised to go to a different facility for specialist care (if home birth to a health post/health center/hospital, if health post/facility to a hospital/different | 1=Yes<br>2= No                                                                                                                                   | <b>SKIP TO 275</b> | — |

1  
2  
3  
4  
5  
6  
7  
8  
9  
10  
11  
12  
13  
14  
15  
16  
17  
18  
19  
20  
21  
22  
23  
24  
25  
26  
27  
28  
29  
30  
31  
32  
33  
34  
35  
36  
37  
38  
39  
40  
41  
42  
43  
44  
45  
46  
47  
48  
49  
50  
51  
52  
53  
54  
55  
56  
57  
58  
59  
60

|                                                                                      |                                                                                                                          |                                                                                                                                                                                    |                         |
|--------------------------------------------------------------------------------------|--------------------------------------------------------------------------------------------------------------------------|------------------------------------------------------------------------------------------------------------------------------------------------------------------------------------|-------------------------|
|                                                                                      | facility)?                                                                                                               |                                                                                                                                                                                    |                         |
| 273h                                                                                 | If Yes: Did you go to that different facility to get the specialist care (referral)?                                     | 1=Yes<br>2= No                                                                                                                                                                     | —<br><b>SKIP TO 275</b> |
| 274h                                                                                 | If Yes: What transport did you take to get there?                                                                        | 1=Own transport<br>2=Public transport<br>3=Hired transport<br>4=District/ambulance<br>5=Traditional ambulance (Qareza/cart)<br>6=Motor Bike/Bajaj<br>7=Walked<br>8=Other (specify) | —                       |
| 275h                                                                                 | Did anyone check on your health after the delivery?                                                                      | 1=Yes<br>2= No                                                                                                                                                                     | —<br><b>SKIP TO 288</b> |
| 276h                                                                                 | How many times did anyone check on your health in the first month after delivery?                                        | Write number. If don't know 99.                                                                                                                                                    | —                       |
| 277h                                                                                 | How long after delivery did the first check take place?                                                                  | Record number of days if same day as delivery enter 0. If don't know 99.                                                                                                           | —                       |
| 278h                                                                                 | Who checked on your health for the first time after you gave birth to [NAME]? ( <i>Probe for most qualified person</i> ) | 1=Doctor/Health Officer<br>2=Nurse/Midwife/Health Officer<br>3=Health Extension Worker<br>4=Traditional birth attendant<br>8=Other (specify)                                       | —                       |
| 279h                                                                                 | Where did this check take place?                                                                                         | 1=Home<br>2=Health post<br>3=Health center<br>4=Hospital<br>8=Other (specify)                                                                                                      | —                       |
| 280h                                                                                 | <i>If her health was checked at least twice (see Q above):</i> How long after delivery did the second check take place?  | Record number of days. If don't know 99.                                                                                                                                           | —                       |
| <i>Do Not read out list, prompt, 'anything else' record 1=Yes for all that apply</i> |                                                                                                                          |                                                                                                                                                                                    |                         |
| 281h                                                                                 | During any of the health checks what was done to check on your health? <b>Examined body</b>                              | 1=Yes<br>2= No                                                                                                                                                                     | —                       |
| 282h                                                                                 | During any of the health checks what was done to check on your health? <b>Checked breasts</b>                            | 1=Yes<br>2= No                                                                                                                                                                     | —                       |
| 283h                                                                                 | During any of the health checks what was done to check on your health? <b>Checked for heavy bleeding</b>                 | 1=Yes<br>2= No                                                                                                                                                                     | —                       |
| 284h                                                                                 | During any of the health checks what was done to check on your health? <b>Counselled on danger signs</b>                 | 1=Yes<br>2= No                                                                                                                                                                     | —                       |
| 285h                                                                                 | During any of the health checks what was done to check on your health? <b>Counselled on family planning</b>              | 1=Yes<br>2= No                                                                                                                                                                     | —                       |
| 286h                                                                                 | During any of the health checks what was done to check on your health? <b>Counselled on nutrition</b>                    | 1=Yes<br>2= No                                                                                                                                                                     | —                       |
| 287h                                                                                 | During any of the health checks what was done to check on your health? <b>Referred to a health facility</b>              | 1=Yes<br>2= No                                                                                                                                                                     | —                       |
| 287h_n                                                                               | During any of the health checks what was done to check on your health? <b>None from the list</b>                         | 1=Yes<br>2= No                                                                                                                                                                     | —                       |

| <b>Section 2.5: Newborn Care</b>                                                                   |                                                                                                                     |                                                                                                                                           |   |
|----------------------------------------------------------------------------------------------------|---------------------------------------------------------------------------------------------------------------------|-------------------------------------------------------------------------------------------------------------------------------------------|---|
| <i>Now I have some questions about what happened to [NAME] at the birth and immediately after.</i> |                                                                                                                     |                                                                                                                                           |   |
| 288h                                                                                               | Can I see a card recording information about the birth? <i>(use the card to verify all information if possible)</i> | 1=Yes<br>2=No                                                                                                                             | — |
| 289h                                                                                               | Was [NAME] weighed at birth?                                                                                        | 1=Yes<br>2=No <b>SKIP TO 291</b>                                                                                                          | — |
| 290h                                                                                               | If Yes, how much did [NAME] weigh at birth? <i>(use the weight recorded on the card if possible)</i>                | <i>Weight in grams e.g. if the weight was 1.9 kilograms enter 1900, If don't know 9999.</i>                                               | — |
| 291h                                                                                               | Did [NAME] have any difficulty breathing/crying at birth?                                                           | 1=Yes<br>2=No <b>SKIP TO 293</b>                                                                                                          |   |
| 292h_a                                                                                             | Did anyone do <b>Rubbing</b> to [NAME] immediately after birth?                                                     | 1= Yes<br>2= No<br>9 = Don't know                                                                                                         | — |
| 292h_b                                                                                             | Did anyone do <b>Stimulating</b> to [NAME] immediately after birth?                                                 | 1= Yes<br>2= No<br>9 = Don't know                                                                                                         | — |
| 292h_c                                                                                             | Did anyone do <b>Mouth-to-mouth</b> to [NAME] immediately after birth?                                              | 1= Yes<br>2= No<br>9= Don't know                                                                                                          | — |
| 292h_d                                                                                             | Did anyone do <b>Resuscitation</b> to [NAME] immediately after birth?                                               | 1= Yes<br>2= No<br>99 = Don't know                                                                                                        | — |
| 292h_e                                                                                             | Did anyone do <b>None of these</b> to [NAME] immediately at birth?                                                  | 1= Yes<br>2= No<br>9= Don't know                                                                                                          | — |
| 293h                                                                                               | Where was [NAME] placed immediately after delivery?                                                                 | 1=Alone/on the floor<br>2=On the mother's belly/chest<br>3=Beside the mother<br>4=With someone else<br>8=Other (specify)<br>9= Don't know | — |
| 294h                                                                                               | When [NAME] was born, was she/he dried/wiped?                                                                       | 1=Yes<br>2=No <b>If 2 or 9 Skip to 296</b><br>9=Don't know                                                                                | — |
| 295h                                                                                               | How long after [NAME] was born was she/he dried/wiped?                                                              | <i>Enter in minutes, check for time after the baby was born (Not time after the placenta came out). If don't know 99</i>                  | — |
| 296h                                                                                               | When [NAME] was born, was she/he wrapped with a cloth?                                                              | 1=Yes<br>2= No <b>If 2 or 9 SKIP TO 298</b><br>9=Don't know                                                                               | — |
| 297h                                                                                               | How long after [NAME] was born was she/he wrapped with a cloth?                                                     | <i>Enter in minutes, check for time after the baby was born (Not time after the placenta came out). If don't know 99</i>                  | — |
| 298h                                                                                               | What was used to tie the cord?                                                                                      | 1=New string/thread<br>2=Boiled string/thread<br>3=Any string/thread<br>4=Nothing<br>8=Other (specify)<br>9=Don't know                    | — |
| 299h                                                                                               | What was used to cut the cord?                                                                                      | 1=New razor blade<br>2=Any razor blade<br>3=Scissors<br>8=Other (specify)<br>9=Don't know                                                 | — |
| 300h                                                                                               | Was anything applied to the cord after cutting and tying?                                                           | 1=Yes<br>2= No <b>SKIP TO 308</b>                                                                                                         | — |

|                                                                                      |                                                                                                                                  |                                                                                                                                                   |   |
|--------------------------------------------------------------------------------------|----------------------------------------------------------------------------------------------------------------------------------|---------------------------------------------------------------------------------------------------------------------------------------------------|---|
|                                                                                      |                                                                                                                                  | 9=Don't know <b>SKIP TO 308</b>                                                                                                                   |   |
| <i>Do Not read out list, prompt, 'anything else' record 1=Yes for all that apply</i> |                                                                                                                                  |                                                                                                                                                   |   |
| 301h                                                                                 | What was applied to the cord just after cutting the cord? <b>Butter</b>                                                          | 1= Yes<br>2= No                                                                                                                                   | — |
| 302h                                                                                 | What was applied to the cord just after cutting the cord? <b>Ash</b>                                                             | 1= Yes<br>2= No                                                                                                                                   | — |
| 303h                                                                                 | What was applied to the cord just after cutting the cord? <b>Ointment</b>                                                        | 1= Yes<br>2= No                                                                                                                                   | — |
| 304h                                                                                 | What was applied to the cord just after cutting the cord? <b>Animal dung</b>                                                     | 1= Yes<br>2= No                                                                                                                                   | — |
| 305h                                                                                 | What was applied to the cord just after cutting the cord? <b>Oil</b>                                                             | 2= No<br>1= Yes                                                                                                                                   | — |
| 306h                                                                                 | What was applied to the cord just after cutting the cord? <b>Cold water</b>                                                      | 1= Yes<br>2= No                                                                                                                                   | — |
| 307h                                                                                 | What was applied to the cord just after cutting the cord? <b>Other</b>                                                           | Specify _____                                                                                                                                     | — |
| 308h                                                                                 | When [NAME] was born, how soon was [NAME] bathed?                                                                                | 1=In the first hour<br>2=After one-hour <b>SKIP TO 310</b><br>3=After one day <b>SKIP TO 311</b>                                                  | — |
| 309h                                                                                 | If in the first hour: After how many minutes would you say?                                                                      | Write number of minutes.<br><b>SKIP TO 310</b>                                                                                                    | — |
| 310h                                                                                 | If after one hour: After how many hours would you say?                                                                           | <i>Write number of hours. If response is 'after one hour' enter 1. If response is 'after one and a half hours' enter 1.</i><br><b>SKIP TO 312</b> | — |
| 311h                                                                                 | If after one day: After how many days would you say?                                                                             | <i>Write number of days. If response is 'after one day' enter 1. If response is 'after one and a half days' enter 1.</i>                          | — |
| 312h                                                                                 | In the first week of life, did you hold [NAME] skin to skin against your breasts during the daytime and night time?              | 1=Yes always<br>2=Yes very often<br>3=Yes sometime<br>4=Never<br>9=Don't know                                                                     | — |
| 313h                                                                                 | In the first week of life, did you sleep with [NAME] against you at night, or did you lay him/her alone on the bed or elsewhere? | 1=Slept with mother<br>2=Baby slept alone<br>3=Baby slept with another person                                                                     | — |
| 314h                                                                                 | Did you ever breastfeed [NAME]?                                                                                                  | 1=Yes<br>2= No <b>SKIP TO 319</b>                                                                                                                 | — |
| 315h                                                                                 | How long after birth did you first put [NAME] to the breast?                                                                     | 1=In the first hour<br>2=After one-hour <b>SKIP TO 317</b><br>3=After one day <b>SKIP TO 318</b>                                                  | — |
| 316h                                                                                 | If in the first hour: After how many minutes would you say?                                                                      | Write number of minutes.<br><b>SKIP TO 319</b>                                                                                                    | — |
| 317h                                                                                 | If after one hour: After how many hours would you say?                                                                           | <i>Write number of hours. If response is 'after one hour' enter 1. If response is 'after one and a half hours' enter 1.</i><br><b>SKIP TO 319</b> | — |
| 318h                                                                                 | How soon after the baby born did you bath him/ her?                                                                              | <i>Write number of days. If response is 'after one day' enter 1. If response is 'after one and a half days' enter 1.</i>                          | — |
| 319h                                                                                 | Did [NAME] receive vitamin K injection after delivery?                                                                           | 1= Yes<br>2= No<br>9= Don't know                                                                                                                  | — |

|                                                                     |                                                                                                                                                                                                                          |                                                                                                                               |   |
|---------------------------------------------------------------------|--------------------------------------------------------------------------------------------------------------------------------------------------------------------------------------------------------------------------|-------------------------------------------------------------------------------------------------------------------------------|---|
| 320h                                                                | Did [NAME] receive TTC eye ointment after delivery?                                                                                                                                                                      | 1 = Yes<br>2 = No<br>9= Don't know                                                                                            | — |
| 321h                                                                | Did [NAME] receive oral polio vaccine-after delivery?                                                                                                                                                                    | 1 = Yes<br>2 = No<br>9= Don't know                                                                                            | — |
| 322h                                                                | Did you squeeze out and throw away the first milk?                                                                                                                                                                       | 1=Yes<br>2= No                                                                                                                | — |
| 323h                                                                | In the first three days after delivery, was [NAME] given anything to drink other than breast milk?                                                                                                                       | 1=Yes<br>2= No                                                                                                                | — |
| <i>Now about care for [name] in the first month of his/her life</i> |                                                                                                                                                                                                                          |                                                                                                                               |   |
| 324h                                                                | In the month after [NAME] was born, did any health care provider or a traditional birth attendant check on his/her health? <i>Probe for checks done at the place of birth on the same day as birth, and checks after</i> | 1=Yes<br>2= No <b>SKIP TO 340</b>                                                                                             | — |
| 325h                                                                | If Yes: In the month after [NAME] was born, how many times did a health care provider or a traditional birth attendant check on his/her health?                                                                          | Write number of times.                                                                                                        | — |
| 326h                                                                | If Yes: How long after delivery did the first check take place?                                                                                                                                                          | <i>Record number of days if same day as delivery enter 0</i>                                                                  | — |
| 327h                                                                | If more than one time: How long after delivery did the second check take place?                                                                                                                                          | <i>Record number of days</i>                                                                                                  | — |
| 328h                                                                | Who checked on [NAME] health the first time? (Probe for most qualified person)                                                                                                                                           | 1=Doctor/Health Officer<br>2=Nurse/Midwife<br>3=Health Extension Worker<br>4=Traditional birth attendant<br>8=Other (specify) | — |
| 329h                                                                | Where did the first check on [NAME] take place?                                                                                                                                                                          | 1=Home<br>2=Health post<br>3=Health centre<br>4=Hospital<br>8=Other (specify)                                                 | — |
| 330h                                                                | At any of the health checks in the first month, what was done to check the health of baby?<br><b>Generally examined/ looked at baby's body</b>                                                                           | 1=Yes<br>2= No                                                                                                                | — |
| 331h                                                                | At any of the health checks in the first month, what was done to check the health of baby?<br><b>Weighed baby</b>                                                                                                        | 1=Yes<br>2= No                                                                                                                | — |
| 332h                                                                | At any of the health checks in the first month, what was done to check the health of baby?<br><b>Checked cord</b>                                                                                                        | 1=Yes<br>2= No                                                                                                                | — |
| 333h                                                                | At any of the health checks in the first month, what was done to check the health of baby?<br><b>Counselled on breastfeeding</b>                                                                                         | 1=Yes<br>2= No                                                                                                                | — |
| 334h                                                                | At any of the health checks in the first month, what was done to check the health of baby?<br><b>Observed breastfeeding</b>                                                                                              | 1=Yes<br>2= No                                                                                                                | — |
| 335h                                                                | At any of the health checks in the first month, what was done to check the health of baby?<br><b>Counselled on skin-to-skin contact/warmth</b>                                                                           | 1=Yes<br>2= No                                                                                                                | — |
| 336h                                                                | At any of the health checks in the first month, what was done to check the health of baby?                                                                                                                               | 1=Yes<br>2= No                                                                                                                | — |

|                                                                                                               |                                                                                                                                    |                                                                                                |   |
|---------------------------------------------------------------------------------------------------------------|------------------------------------------------------------------------------------------------------------------------------------|------------------------------------------------------------------------------------------------|---|
|                                                                                                               | <b>Checked baby for danger signs</b>                                                                                               |                                                                                                |   |
| 337h                                                                                                          | At any of the health checks in the first month, what was done to check the health of baby?<br><b>Counselled on danger signs</b>    | 1=Yes<br>2= No                                                                                 | — |
| 338h                                                                                                          | At any of the health checks in the first month, what was done to check the health of baby?<br><b>Referred to a health facility</b> | 1=Yes<br>2= No                                                                                 | — |
| 339h                                                                                                          | At any of the health checks in the first month, what was done to check the health of baby?<br><b>Nothing</b>                       | 1=Yes<br>2= No                                                                                 | — |
| <i>Now I want to talk to you about any sickness your child experienced in the <b>first month of life.</b></i> |                                                                                                                                    |                                                                                                |   |
| 341h                                                                                                          | Was [NAME] sick in the first month?                                                                                                | 1=Yes<br>2= No <b>SKIP TO 396</b>                                                              | — |
| 342h                                                                                                          | Can I just check, did [NAME] have any of the following symptoms? <b>Stopped feeding well</b>                                       | 1=Yes<br>2= No                                                                                 | — |
| 343h                                                                                                          | Can I just check, did [NAME] have any of the following symptoms?<br><b>Difficult or fast breathing</b>                             | 1=Yes<br>2= No                                                                                 | — |
| 344h                                                                                                          | Can I just check, did [NAME] have any of the following symptoms? <b>Chest in-drawing</b>                                           | 1=Yes<br>2= No                                                                                 | — |
| 345h                                                                                                          | Can I just check, did [NAME] have any of the following symptoms? <b>Unusually hot or cold</b>                                      | 1=Yes<br>2= No                                                                                 | — |
| 346h                                                                                                          | Can I just check, did [NAME] have any of the following symptoms?<br><b>Baby less active than usual</b>                             | 1=Yes<br>2= No                                                                                 | — |
| 347h                                                                                                          | Can I just check, did [NAME] have any of the following symptoms? <b>Body became yellow</b>                                         | 1=Yes<br>2= No                                                                                 | — |
| 348h                                                                                                          | Can I just check, did [NAME] have any of the following symptoms? <b>Other</b>                                                      | <b>Specify</b>                                                                                 | — |
| 349h                                                                                                          | If any sickness/symptom reported: How old was [NAME] when sick for the first time?                                                 | <i>Record number of days of age when [NAME] was first sick if on first day of life enter 0</i> | — |
| <b>Check all the following symptoms: (Read all)</b>                                                           |                                                                                                                                    |                                                                                                |   |
| 350h                                                                                                          | When [NAME] was sick that first time what was the problem? <b>Fever</b>                                                            | 1=Yes<br>2= No                                                                                 | — |
| 351h                                                                                                          | When [NAME] was sick that first time what was the problem? <b>Unable to suckle/feed</b>                                            | 1=Yes<br>2= No                                                                                 | — |
| 352h                                                                                                          | When [NAME] was sick that first time what was the problem? <b>Difficult/fast breathing</b>                                         | 1=Yes<br>2= No                                                                                 | — |
| 353h                                                                                                          | When [NAME] was sick that first time what was the problem? <b>Severe chest in-drawing</b>                                          | 1=Yes<br>2= No                                                                                 | — |
| 354h                                                                                                          | When [NAME] was sick that first time what was the problem? <b>Diarrhea</b>                                                         | 1=Yes<br>2= No                                                                                 | — |
| 355h                                                                                                          | When [NAME] was sick that first time what was the problem? <b>Convulsions</b>                                                      | 1=Yes<br>2= No                                                                                 | — |
| 356h                                                                                                          | When [NAME] was sick that first time what was the problem? <b>Persistent vomiting</b>                                              | 1=Yes<br>2= No                                                                                 | — |
| 357h                                                                                                          | When [NAME] was sick that first time what was the problem? <b>Yellow palms/soles/eyes</b>                                          | 1=Yes<br>2= No                                                                                 | — |

|                                                                                                                                                                    |                                                                                                                                                                    |                                   |       |
|--------------------------------------------------------------------------------------------------------------------------------------------------------------------|--------------------------------------------------------------------------------------------------------------------------------------------------------------------|-----------------------------------|-------|
| 358h                                                                                                                                                               | When [NAME] was sick that first time what was the problem? <b>Lethargy</b>                                                                                         | 1=Yes<br>2= No                    | —     |
| 359h                                                                                                                                                               | When [NAME] was sick that first time what was the problem? <b>Unconscious</b>                                                                                      | 1=Yes<br>2= No                    | —     |
| 360h                                                                                                                                                               | When [NAME] was sick that first time what was the problem? <b>Red/discharge eyes</b>                                                                               | 1=Yes<br>2=No                     | —     |
| 361h                                                                                                                                                               | When [NAME] was sick that first time what was the problem? <b>Skin pustules</b>                                                                                    | 1=Yes<br>2=No                     | —     |
| 362h                                                                                                                                                               | When [NAME] was sick that first time what was the problem? <b>Skin around cord was red</b>                                                                         | 1=Yes<br>2=No                     | —     |
| 363h                                                                                                                                                               | When [NAME] was sick that first time what was the problem? <b>Pus from cord</b>                                                                                    | 1=Yes<br>2=No                     | —     |
| 364h                                                                                                                                                               | When [NAME] was sick that first time what was the problem? <b>Other</b>                                                                                            | Specify                           | _____ |
| <i>Select all that apply for the time before the baby was taken for extra care (do Not read out list, prompt, 'anything else' record 1=Yes for all that apply)</i> |                                                                                                                                                                    |                                   |       |
| 365h                                                                                                                                                               | How was [NAME] treated for this illness at home? <b>Giving drugs</b>                                                                                               | 1=Yes<br>2=No                     | —     |
| 366h                                                                                                                                                               | How was [NAME] treated for this illness at home? <b>Giving herbs</b>                                                                                               | 1=Yes<br>2=No                     | —     |
| 367h                                                                                                                                                               | How was [NAME] treated for this illness at home? <b>Contacting a provider for advice</b>                                                                           | 1=Yes<br>2=No                     | —     |
| 368h                                                                                                                                                               | How was [NAME] treated for this illness at home? <b>Contacting someone else for advice</b>                                                                         | 1=Yes<br>2=No                     | —     |
| 369h                                                                                                                                                               | How was [NAME] treated for this illness at home? <b>No treatment given at home</b>                                                                                 | 1=Yes<br>2=No                     | —     |
| 370h                                                                                                                                                               | How was [NAME] treated for this illness at home? <b>Don't remember</b>                                                                                             | 1=Yes<br>2=No                     | —     |
| 371h                                                                                                                                                               | Did you seek care for [NAME] outside the home at that time?                                                                                                        | 1=Yes <b>SKIP TO 373</b><br>2= No | —     |
| 372h_a                                                                                                                                                             | If No care sought at that time: Why didn't you seek care for [NAME] outside the home during that first illness?<br><b>Expected him/her to get better</b>           | 1=Yes<br>2=No                     | —     |
| 372h_b                                                                                                                                                             | If No care sought at that time: Why didn't you seek care for [NAME] outside the home during that first illness? <b>Health facility too far</b>                     | 1=Yes<br>2=No                     | —     |
| 372h_c                                                                                                                                                             | If No care sought at that time: Why didn't you seek care for [NAME] outside the home during that first illness?<br><b>Cost of treatment too expensive</b>          | 1=Yes<br>2=No                     | —     |
| 372h_d                                                                                                                                                             | If No care sought at that time: Why didn't you seek care for [NAME] outside the home during that first illness? <b>Don't trust the facility</b>                    | 1=Yes<br>2=No                     | —     |
| 372h_e                                                                                                                                                             | If No care sought at that time: Why didn't you seek care for [NAME] outside the home during that first illness? <b>Family member didn't allow</b>                  | 1=Yes<br>2=No                     | —     |
| 372h_f                                                                                                                                                             | If No care sought at that time: Why didn't you seek care for [NAME] outside the home during that first illness?<br><b>Community advisor/TBA advised against it</b> | 1=Yes<br>2=No                     | —     |
| 372h_g                                                                                                                                                             | If No care sought at that time: Why didn't you seek care for [NAME] outside the home during that first illness? <b>Other</b>                                       | Specify                           | —     |

|                                                                                                             |                                                                                                                     |                                                                                                                                |       |
|-------------------------------------------------------------------------------------------------------------|---------------------------------------------------------------------------------------------------------------------|--------------------------------------------------------------------------------------------------------------------------------|-------|
| 373h                                                                                                        | If sought care: How many times did you seek care for that illness?                                                  | Write number of times                                                                                                          | —     |
| 374h                                                                                                        | Where outside the home did you seek care from the first time?                                                       | 1=Health post<br>2=Health centre<br>3=Hospital<br>4=Pharmacy/shop<br>8=Other (specify)                                         | —     |
| 375h                                                                                                        | Do you have any medical record from when you went for health care outside the home the first time?                  | 1=Yes<br>2= No <b>SKIP TO 377</b>                                                                                              | —     |
| 376h                                                                                                        | If Yes, can I see it?                                                                                               | 1=Yes<br>2= No                                                                                                                 | —     |
| 377h                                                                                                        | After how many days did you seek care the first time?                                                               | Write number of days from the onset of illness, if first day of illness write 0. If possible use the medical record to confirm | —     |
| 378h                                                                                                        | If Yes to any of the symptoms (342-348): At any time during the illness, did [NAME] take any drugs for the illness? | If the information is available from the card use it<br>1=Yes<br>2= No <b>(END OF MODULE)</b>                                  | —     |
| <i>Select all mentioned (do Not read out list, prompt, 'anything else' record 1=Yes for all that apply)</i> |                                                                                                                     |                                                                                                                                |       |
| 379h                                                                                                        | What drugs did [NAME] take?<br><b>Antimalarial tablet</b>                                                           | 1=Yes<br>2= No                                                                                                                 | —     |
| 382h                                                                                                        | What drugs did [NAME] take?<br><b>Antibiotic: Gentamicin injection</b>                                              | 1=Yes<br>2= No                                                                                                                 | —     |
| 383h                                                                                                        | What drugs did [NAME] take?<br><b>Antibiotic: Amoxicillin syrup or tablet</b>                                       | 1=Yes<br>2= No                                                                                                                 | —     |
| 384h                                                                                                        | What drugs did [NAME] take?<br><b>Antibiotic: Cotrimoxazole syrup</b>                                               | 1=Yes<br>2= No                                                                                                                 | —     |
| 385h                                                                                                        | What drugs did [NAME] take?<br><b>Antibiotic: Other /Not known</b>                                                  | 1=Yes<br>2= No                                                                                                                 | —     |
| 386h                                                                                                        | What drugs did [NAME] take?<br><b>Tetracycline eye ointment</b>                                                     | 1=Yes<br>2= No                                                                                                                 | —     |
| 387h                                                                                                        | What drugs did [NAME] take? <b>Zinc</b>                                                                             | 1=Yes<br>2= No                                                                                                                 | —     |
| 388h                                                                                                        | What drugs did [NAME] take? <b>ORS</b>                                                                              | 1=Yes<br>2= No                                                                                                                 | —     |
| 389h                                                                                                        | What drugs did [NAME] take?<br><b>Combined Zinc-ORS</b>                                                             | 1=Yes<br>2= No                                                                                                                 | —     |
| 390h                                                                                                        | What drugs did [NAME] take? <b>Vitamin A</b>                                                                        | 1=Yes<br>2= No                                                                                                                 | —     |
| 391h                                                                                                        | What drugs did [NAME] take? <b>Paracetamol</b>                                                                      | 1=Yes<br>2= No                                                                                                                 | —     |
| 392h                                                                                                        | What drugs did [NAME] take?<br><b>Traditional remedies herbs/local remedy</b>                                       | 1=Yes<br>2= No                                                                                                                 | —     |
| 393h                                                                                                        | What drugs did [NAME] take? <b>Other</b>                                                                            | Specify                                                                                                                        | _____ |
| 394h                                                                                                        | If Yes to gentamicin injection: Did [NAME] receive<br><b>7 consecutive days of gentamycin injection?</b>            | 1=Yes<br>2= No<br>9 = Don't know                                                                                               | —     |
| 395h                                                                                                        | If Yes to amoxicillin: Did [NAME] receive<br><b>7 consecutive days of amoxicillin?</b>                              | 1=Yes<br>2= No<br>9= Don't know                                                                                                | —     |

**End – thank the participant. Check to see if the participant needs to answer the child module. If so, continue to Module 3. Otherwise check whether there is another woman aged 13-49 in the house.**



## Module 3 – Child Health

### Section 3.1: Identification of and consent from caregivers

|      |                                                                                                             |                                                                         |
|------|-------------------------------------------------------------------------------------------------------------|-------------------------------------------------------------------------|
| 396h | <b>Interviewer:</b> How many children under 5 years of age live in this household? Check household listing. | _____                                                                   |
| 397h | <b>Interviewer:</b> select name of caregiver from household listing                                         | _____                                                                   |
| 398h | <b>Interviewer:</b> select ID of the caregiver from household listing                                       | _____                                                                   |
| 399h | Is it possible to interview the caregiver?                                                                  | 1=Yes <b>SKIP TO 401</b><br>2=No                                        |
| 400h | If No, why Not possible to interview the caregiver?                                                         | 1=Travelled away<br>2=Sick<br>3=Currently Not present<br>8=Other reason |
| 401h | <b>Interviewer:</b> Have you read her the consent form?                                                     | 1=Yes<br>2= No-one is available (add reason)                            |
| 402h | <b>Interviewer:</b> Does he/she give her consent to be interviewed??                                        | 1=Yes<br>2=No END INTERVIEW.                                            |

### Section 3.2: Knowledge of malaria, diarrhea & pneumonia

*Do Not read out list, prompt, 'anything else' record 1=Yes for all that apply*

|      |                                                                            |               |
|------|----------------------------------------------------------------------------|---------------|
| 403h | Why do you sleep under a mosquito net?<br><b>Protects from malaria</b>     | 1=Yes<br>2=No |
| 404h | Why do you sleep under a mosquito net?<br><b>Protects from mosquitoes</b>  | 1=Yes<br>2=No |
| 405h | Why do you sleep under a mosquito net?<br><b>Given free</b>                | 1=Yes<br>2=No |
| 406h | Why do you sleep under a mosquito net?<br><b>Bought cheaply</b>            | 1=Yes<br>2=No |
| 407h | Why do you sleep under a mosquito net?<br><b>Look attractive</b>           | 1=Yes<br>2=No |
| 408h | Why do you sleep under a mosquito net? Health worker said to use           | 1=Yes<br>2=No |
| 409h | Why do you sleep under a mosquito net?<br><b>Someone told me to use it</b> | 1=Yes<br>2=No |
| 410h | Why do you sleep under a mosquito net?<br><b>Neighbor uses it</b>          | 1=Yes<br>2=No |
| 411h | Why do you sleep under a mosquito net?<br><b>Other</b>                     | Specify       |
| 412h | Why do you sleep under a mosquito net?<br><b>Don't know</b>                | 1=Yes<br>2=No |

| <b>Do Not read out list, prompt, 'anything else' record 1=Yes for all that apply</b> |                                                                                                                       |               |
|--------------------------------------------------------------------------------------|-----------------------------------------------------------------------------------------------------------------------|---------------|
| 413h                                                                                 | If you don't want to get sick from malaria, how can you protect yourself? <b>Use a Bednet</b>                         | 1=Yes<br>2=No |
| 414h                                                                                 | If you don't want to get sick from malaria, how can you protect yourself? <b>Use repellent or spray</b>               | 1=Yes<br>2=No |
| 415h                                                                                 | If you don't want to get sick from malaria, how can you protect yourself? <b>Avoid mosquitoes/bites</b>               | 1=Yes<br>2=No |
| 416h                                                                                 | If you don't want to get sick from malaria, how can you protect yourself? <b>Take medication for</b>                  | 1=Yes<br>2=No |
| 417h                                                                                 | If you don't want to get sick from malaria, how can you protect yourself? <b>prevention Keep surroundings clean</b>   | 1=Yes<br>2=No |
| 418h                                                                                 | If you don't want to get sick from malaria, how can you protect yourself? <b>Eat well</b>                             | 1=Yes<br>2=No |
| 419h                                                                                 | If you don't want to get sick from malaria, how can you protect yourself? <b>Drink boiled water</b>                   | 1=Yes<br>2=No |
| 420h                                                                                 | If you don't want to get sick from malaria, how can you protect yourself? <b>Avoid getting wet from rain</b>          | 1=Yes<br>2=No |
| 421h                                                                                 | If you don't want to get sick from malaria, how can you protect yourself? <b>Other</b>                                | Specify       |
| 422h                                                                                 | If you don't want to get sick from malaria, how can you protect yourself? <b>Don't know</b>                           | 1=Yes<br>2=No |
| <b>423h</b>                                                                          | Have you seen or hear any messages on:<br><b>Bed nets</b>                                                             | 1=Yes<br>2=No |
|                                                                                      | <i>Multiple options are possible. (do Not read out list, prompt, 'anything else' record 1=Yes for all that apply)</i> |               |
| 423h_1                                                                               | Where did you hear the message about <b>Bed nets</b> from?<br><b>Friend</b>                                           | 1=Yes<br>2=No |
| 423h_2                                                                               | Where did you hear the message about <b>Bed nets</b> from?<br><b>At Health Centre</b>                                 | 1=Yes<br>2=No |
| 423h_3                                                                               | Where did you hear the message about <b>Bed nets</b> from?<br><b>HEW</b>                                              | 1=Yes<br>2=No |
| 423h_4                                                                               | Where did you hear the message about <b>Bed nets</b> from?<br><b>WDA</b>                                              | 1=Yes<br>2=No |
| 423h_5                                                                               | Where did you hear the message about <b>Bed nets</b> from?<br><b>Newspaper</b>                                        | 1=Yes<br>2=No |
| 423h_6                                                                               | Where did you hear the message about <b>Bed nets</b> from?<br><b>TV</b>                                               | 1=Yes<br>2=No |
| 423h_7                                                                               | Where did you hear the message about <b>Bed nets</b> from?<br><b>Radio</b>                                            | 1=Yes<br>2=No |
| 423h_8                                                                               | Where did you hear the message about <b>Bed nets</b> from?<br><b>Government official</b>                              | 1=Yes<br>2=No |
| 423h_9                                                                               | Where did you hear the message about <b>Bed nets</b> from?<br><b>Church/Mosque</b>                                    | 1=Yes<br>2=No |
| 423h_10                                                                              | Where did you hear the message about <b>Bed nets</b> from?<br><b>School</b>                                           | 1=Yes<br>2=No |
| 423h_11                                                                              | Where did you hear the message about <b>Bed nets</b> from?<br><b>Poster/flier</b>                                     | 1=Yes<br>2=No |

|                                                                                                          |                                                                                           |               |
|----------------------------------------------------------------------------------------------------------|-------------------------------------------------------------------------------------------|---------------|
| 423h_12                                                                                                  | Where did you hear the message about <b>Bed nets</b> from?<br><b>Meeting</b>              | 1=Yes<br>2=No |
| 423h_13                                                                                                  | Where did you hear the message about <b>Bed nets</b> from?<br><b>Street announcement</b>  | 1=Yes<br>2=No |
| 423h_14                                                                                                  | Where did you hear the message about <b>Bed nets</b> from?<br><b>Other</b>                | Specify       |
|                                                                                                          |                                                                                           |               |
| <b>424h</b>                                                                                              | Have you seen or hear any messages on:<br><b>Malaria treatment using ACT</b>              | 1=Yes<br>2=No |
| <i>Multiple options are possible. (do Not read out list, prompt, 'anything else' for all that apply)</i> |                                                                                           |               |
| 424h_1                                                                                                   | Where did you hear the message about <b>ACT</b> from?<br><b>Friend</b>                    | 1=Yes<br>2=No |
| 424h_2                                                                                                   | Where did you hear the message about <b>ACT</b> from?<br><b>At Health Centre</b>          | 1=Yes<br>2=No |
| 424h_3                                                                                                   | Where did you hear the message about <b>ACT</b> from?<br><b>HEW</b>                       | 1=Yes<br>2=No |
| 424h_4                                                                                                   | Where did you hear the message about <b>ACT</b> from?<br><b>WDA</b>                       | 1=Yes<br>2=No |
| 424h_5                                                                                                   | Where did you hear the message about <b>ACT</b> from?<br><b>Newspaper</b>                 | 1=Yes<br>2=No |
| 424h_6                                                                                                   | Where did you hear the message about <b>ACT</b> from?<br><b>TV</b>                        | 1=Yes<br>2=No |
| 424h_7                                                                                                   | Where did you hear the message about <b>ACT</b> from?<br><b>Radio</b>                     | 1=Yes<br>2=No |
| 424h_8                                                                                                   | Where did you hear the message about <b>ACT</b> from?<br><b>Government official</b>       | 1=Yes<br>2=No |
| 424h_9                                                                                                   | Where did you hear the message about <b>ACT</b> from?<br><b>Church/Mosque</b>             | 1=Yes<br>2=No |
| 424h_10                                                                                                  | Where did you hear the message about <b>ACT</b> from?<br><b>School</b>                    | 1=Yes<br>2=No |
| 424h_11                                                                                                  | Where did you hear the message about <b>ACT</b> from?<br><b>Poster/flier</b>              | 1=Yes<br>2=No |
| 424h_12                                                                                                  | Where did you hear the message about <b>ACT</b> from?<br><b>Meeting</b>                   | 1=Yes<br>2=No |
| 424h_13                                                                                                  | Where did you hear the message about <b>ACT</b> from?<br><b>Street announcement</b>       | 1=Yes<br>2=No |
| 424h_14                                                                                                  | Where did you hear the message about <b>ACT</b> from?<br><b>Other</b>                     | Specify       |
|                                                                                                          |                                                                                           |               |
| <b>425h</b>                                                                                              | Have you seen or hear any messages on:<br><b>Rapid diagnostic tests (RDT) for malaria</b> | 1=Yes<br>2=No |
| <i>Multiple options are possible. (do Not read out list, prompt, 'anything else' for all that apply)</i> |                                                                                           |               |
| 425h_1                                                                                                   | Where did you hear the message about <b>RDT</b> from?<br><b>Friend</b>                    | 1=Yes<br>2=No |
| 425h_2                                                                                                   | Where did you hear the message about <b>RDT</b> from?<br><b>At Health Centre</b>          | 1=Yes<br>2=No |
| 425h_3                                                                                                   | Where did you hear the message about <b>RDT</b> from?<br><b>HEW</b>                       | 1=Yes<br>2=No |

|                                                                                                          |                                                                                                   |               |
|----------------------------------------------------------------------------------------------------------|---------------------------------------------------------------------------------------------------|---------------|
| 425h_4                                                                                                   | Where did you hear the message about <b>RDT</b> from?<br><b>WDA</b>                               | 1=Yes<br>2=No |
| 425h_5                                                                                                   | Where did you hear the message about <b>RDT</b> from?<br><b>Newspaper</b>                         | 1=Yes<br>2=No |
| 425h_6                                                                                                   | Where did you hear the message about <b>RDT</b> from?<br><b>TV</b>                                | 1=Yes<br>2=No |
| 425h_7                                                                                                   | Where did you hear the message about <b>RDT</b> from?<br><b>Radio</b>                             | 1=Yes<br>2=No |
| 425h_8                                                                                                   | Where did you hear the message about <b>RDT</b> from?<br><b>Government official</b>               | 1=Yes<br>2=No |
| 425h_9                                                                                                   | Where did you hear the message about <b>RDT</b> from?<br><b>Church/Mosque</b>                     | 1=Yes<br>2=No |
| 425h_10                                                                                                  | Where did you hear the message about <b>RDT</b> from?<br><b>School</b>                            | 1=Yes<br>2=No |
| 425h_11                                                                                                  | Where did you hear the message about <b>RDT</b> from?<br><b>Poster/flier</b>                      | 1=Yes<br>2=No |
| 425h_12                                                                                                  | Where did you hear the message about <b>RDT</b> from?<br><b>Meeting</b>                           | 1=Yes<br>2=No |
| 425h_13                                                                                                  | Where did you hear the message about <b>RDT</b> from?<br><b>Street announcement</b>               | 1=Yes<br>2=No |
| 425h_14                                                                                                  | Where did you hear the message about <b>RDT</b> from?<br><b>Other</b>                             | Specify       |
|                                                                                                          |                                                                                                   |               |
| <b>426h</b>                                                                                              | Have you seen or hear any messages on:<br><b>Rectal artesunate</b>                                | 1=Yes<br>2=No |
| <i>Multiple options are possible. (do Not read out list, prompt, 'anything else' for all that apply)</i> |                                                                                                   |               |
| 426h_1                                                                                                   | Where did you hear the message about <b>Rectal artesunate</b> from?<br><b>Friend</b>              | 1=Yes<br>2=No |
| 426h_2                                                                                                   | Where did you hear the message about <b>Rectal artesunate</b> from?<br><b>At Health Centre</b>    | 1=Yes<br>2=No |
| 426h_3                                                                                                   | Where did you hear the message about <b>Rectal artesunate</b> from?<br><b>HEW</b>                 | 1=Yes<br>2=No |
| 426h_4                                                                                                   | Where did you hear the message about <b>Rectal artesunate</b> from?<br><b>WDA</b>                 | 1=Yes<br>2=No |
| 426h_5                                                                                                   | Where did you hear the message about <b>Rectal artesunate</b> from?<br><b>Newspaper</b>           | 1=Yes<br>2=No |
| 426h_6                                                                                                   | Where did you hear the message about <b>Rectal artesunate</b> from?<br><b>TV</b>                  | 1=Yes<br>2=No |
| 426h_7                                                                                                   | Where did you hear the message about <b>Rectal artesunate</b> from?<br><b>Radio</b>               | 1=Yes<br>2=No |
| 426h_8                                                                                                   | Where did you hear the message about <b>Rectal artesunate</b> from?<br><b>Government official</b> | 1=Yes<br>2=No |
| 426h_9                                                                                                   | Where did you hear the message about <b>Rectal artesunate</b> from?<br><b>Church/Mosque</b>       | 1=Yes<br>2=No |
| 426h_10                                                                                                  | Where did you hear the message about <b>Rectal artesunate</b> from?<br><b>School</b>              | 1=Yes<br>2=No |
| 426h_11                                                                                                  | Where did you hear the message about <b>Rectal artesunate</b> from?<br><b>Poster/flier</b>        | 1=Yes<br>2=No |

|                                                                                                          |                                                                                                 |               |
|----------------------------------------------------------------------------------------------------------|-------------------------------------------------------------------------------------------------|---------------|
| 426h_12                                                                                                  | Where did you hear the message about <b>Rectal artesunate</b> from? <b>Meeting</b>              | 1=Yes<br>2=No |
| 426h_13                                                                                                  | Where did you hear the message about <b>Rectal artesunate</b> from? <b>Street announcement</b>  | 1=Yes<br>2=No |
| 426h_14                                                                                                  | Where did you hear the message about <b>Rectal artesunate</b> from? <b>Other</b>                | Specify       |
|                                                                                                          |                                                                                                 |               |
| <b>427h</b>                                                                                              | Have you seen or hear any messages on:<br><b>Diarrhea treatment</b>                             | 1=Yes<br>2=No |
| <i>Multiple options are possible. (do Not read out list, prompt, 'anything else' for all that apply)</i> |                                                                                                 |               |
| 427h_1                                                                                                   | Where did you hear the message about <b>Diarrhea treatment</b> from? <b>Friend</b>              | 1=Yes<br>2=No |
| 427h_2                                                                                                   | Where did you hear the message about <b>Diarrhea treatment</b> from? <b>At Health Centre</b>    | 1=Yes<br>2=No |
| 427h_3                                                                                                   | Where did you hear the message about <b>Diarrhea treatment</b> from? <b>HEW</b>                 | 1=Yes<br>2=No |
| 427h_4                                                                                                   | Where did you hear the message about <b>Diarrhea treatment</b> from? <b>WDA</b>                 | 1=Yes<br>2=No |
| 427h_5                                                                                                   | Where did you hear the message about <b>Diarrhea treatment</b> from? <b>Newspaper</b>           | 1=Yes<br>2=No |
| 427h_6                                                                                                   | Where did you hear the message about <b>Diarrhea treatment</b> from? <b>TV</b>                  | 1=Yes<br>2=No |
| 427h_7                                                                                                   | Where did you hear the message about <b>Diarrhea treatment</b> from? <b>Radio</b>               | 1=Yes<br>2=No |
| 427h_8                                                                                                   | Where did you hear the message about <b>Diarrhea treatment</b> from? <b>Government official</b> | 1=Yes<br>2=No |
| 427h_9                                                                                                   | Where did you hear the message about <b>Diarrhea treatment</b> from? <b>Church/Mosque</b>       | 1=Yes<br>2=No |
| 427h_10                                                                                                  | Where did you hear the message about <b>Diarrhea treatment</b> from? <b>School</b>              | 1=Yes<br>2=No |
| 427h_11                                                                                                  | Where did you hear the message about <b>Diarrhea treatment</b> from? <b>Poster/flier</b>        | 1=Yes<br>2=No |
| 427h_12                                                                                                  | Where did you hear the message about <b>Diarrhea treatment</b> from? <b>Meeting</b>             | 1=Yes<br>2=No |
| 427h_13                                                                                                  | Where did you hear the message about <b>Diarrhea treatment</b> from? <b>Street announcement</b> | 1=Yes<br>2=No |
| 427h_14                                                                                                  | Where did you hear the message about <b>Diarrhea treatment</b> from? <b>Other</b>               | Specify       |
|                                                                                                          |                                                                                                 |               |
| <b>428h</b>                                                                                              | Have you seen or hear any messages on:<br><b>Pneumonia treatment</b>                            | 1=Yes<br>2=No |
| <i>Multiple options are possible. (do Not read out list, prompt, 'anything else' for all that apply)</i> |                                                                                                 |               |
| 428h_1                                                                                                   | Where did you hear the message about <b>Pneumonia treatment</b> from? <b>Friend</b>             | 1=Yes<br>2=No |
| 428h_2                                                                                                   | Where did you hear the message about <b>Pneumonia treatment</b> from? <b>At Health Centre</b>   | 1=Yes<br>2=No |
| 428h_3                                                                                                   | Where did you hear the message about <b>Pneumonia treatment</b> from? <b>HEW</b>                | 1=Yes<br>2=No |

|                                                                                                          |                                                                                                          |               |
|----------------------------------------------------------------------------------------------------------|----------------------------------------------------------------------------------------------------------|---------------|
| 428h_4                                                                                                   | Where did you hear the message about <b>Pneumonia treatment</b> from? <b>WDA</b>                         | 1=Yes<br>2=No |
| 428h_5                                                                                                   | Where did you hear the message about <b>Pneumonia treatment</b> from? <b>Newspaper</b>                   | 1=Yes<br>2=No |
| 428h_6                                                                                                   | Where did you hear the message about <b>Pneumonia treatment</b> from? <b>TV</b>                          | 1=Yes<br>2=No |
| 428h_7                                                                                                   | Where did you hear the message about <b>Pneumonia treatment</b> from? <b>Radio</b>                       | 1=Yes<br>2=No |
| 428h_8                                                                                                   | Where did you hear the message about <b>Pneumonia treatment</b> from? <b>Government official</b>         | 1=Yes<br>2=No |
| 428h_9                                                                                                   | Where did you hear the message about <b>Pneumonia treatment</b> from? <b>Church/Mosque</b>               | 1=Yes<br>2=No |
| 428h_10                                                                                                  | Where did you hear the message about <b>Pneumonia treatment</b> from? <b>School</b>                      | 1=Yes<br>2=No |
| 428h_11                                                                                                  | Where did you hear the message about <b>Pneumonia treatment</b> from? <b>Poster/flier</b>                | 1=Yes<br>2=No |
| 428h_12                                                                                                  | Where did you hear the message about <b>Pneumonia treatment</b> from? <b>Meeting</b>                     | 1=Yes<br>2=No |
| 428h_13                                                                                                  | Where did you hear the message about <b>Pneumonia treatment</b> from? <b>Street announcement</b>         | 1=Yes<br>2=No |
| 428h_14                                                                                                  | Where did you hear the message about <b>Pneumonia treatment</b> from? <b>Other</b>                       | Specify       |
|                                                                                                          |                                                                                                          |               |
| <b>429h</b>                                                                                              | Have you seen or hear any messages on: <b>Treatment for sick newborns</b>                                | 1=Yes<br>2=No |
| 429h_1                                                                                                   | Where did you hear the message about <b>Pneumonia treatment</b> from? <b>Friend</b>                      | 1=Yes<br>2=No |
| <i>Multiple options are possible. (do Not read out list, prompt, 'anything else' for all that apply)</i> |                                                                                                          |               |
| 429h_2                                                                                                   | Where did you hear the message <b>Treatment for sick newborns</b> from? <b>At Health Centre</b>          | 1=Yes<br>2=No |
| 429h_3                                                                                                   | Where did you hear the message about <b>Treatment for sick newborns</b> from? <b>HEW</b>                 | 1=Yes<br>2=No |
| 429h_4                                                                                                   | Where did you hear the message about <b>Treatment for sick newborns</b> from? <b>WDA</b>                 | 1=Yes<br>2=No |
| 429h_5                                                                                                   | Where did you hear the message about <b>Treatment for sick newborns</b> from? <b>Newspaper</b>           | 1=Yes<br>2=No |
| 429h_6                                                                                                   | Where did you hear the message about <b>Treatment for sick newborns</b> from? <b>TV</b>                  | 1=Yes<br>2=No |
| 429h_7                                                                                                   | Where did you hear the message about <b>Treatment for sick newborns</b> from? <b>Radio</b>               | 1=Yes<br>2=No |
| 429h_8                                                                                                   | Where did you hear the message about <b>Treatment for sick newborns</b> from? <b>Government official</b> | 1=Yes<br>2=No |
| 429h_9                                                                                                   | Where did you hear the message about <b>Treatment for sick newborns</b> from? <b>Church/Mosque</b>       | 1=Yes<br>2=No |
| 429h_10                                                                                                  | Where did you hear the message about <b>Treatment for sick newborns</b> from? <b>School</b>              | 1=Yes<br>2=No |
| 429h_11                                                                                                  | Where did you hear the message about <b>Treatment for sick newborns</b> from? <b>Poster/flier</b>        | 1=Yes<br>2=No |

|         |                                                                                                          |               |
|---------|----------------------------------------------------------------------------------------------------------|---------------|
| 429h_12 | Where did you hear the message about <b>Treatment for sick newborns</b> from? <b>Meeting</b>             | 1=Yes<br>2=No |
| 429h_13 | Where did you hear the message about <b>Treatment for sick newborns</b> from? <b>Street announcement</b> | 1=Yes<br>2=No |
| 429h_14 | Where did you hear the message about <b>Treatment for sick newborns</b> from? <b>Other</b>               | Specify       |

| <i>Do Not read out list, prompt, 'anything else' record 1=Yes for all that apply)</i> |                                                                                                    |               |   |
|---------------------------------------------------------------------------------------|----------------------------------------------------------------------------------------------------|---------------|---|
| 444h                                                                                  | If your child is sick with a <b>fever</b> what should you do? <b>Ignore it will go away</b>        | 1=Yes<br>2=No | — |
| 445h                                                                                  | If your child is sick with a <b>fever</b> what should you do? <b>Go to health centre</b>           | 1=Yes<br>2=No | — |
| 446h                                                                                  | If your child is sick with a <b>fever</b> what should you do? <b>Go to HEW</b>                     | 1=Yes<br>2=No | — |
| 447h                                                                                  | If your child is sick with a <b>fever</b> what should you do? <b>Go to WDA</b>                     | 1=Yes<br>2=No | — |
| 448h                                                                                  | If your child is sick with a <b>fever</b> what should you do? <b>Go to traditional healer</b>      | 1=Yes<br>2=No | — |
| 449h                                                                                  | If your child is sick with a <b>fever</b> what should you do? <b>Ask to be tested for malaria</b>  | 1=Yes<br>2=No | — |
| 450h                                                                                  | If your child is sick with a <b>fever</b> what should you do? <b>Treat with antimalarial / ACT</b> | 1=Yes<br>2=No | — |
| 451h                                                                                  | If your child is sick with a <b>fever</b> what should you do? <b>Treat with paracetamol</b>        | 1=Yes<br>2=No | — |
| 452h                                                                                  | If your child is sick with a <b>fever</b> what should you do? <b>Treat with antibiotic</b>         | 1=Yes<br>2=No | — |
| 453h                                                                                  | If your child is sick with a <b>fever</b> what should you do? <b>Treat with other medicine</b>     | 1=Yes<br>2=No | — |
| 454h                                                                                  | If your child is sick with a <b>fever</b> what should you do? <b>Other</b>                         | Specify       | — |
| <i>Do Not read out list, prompt, 'anything else' record 1=Yes for all that apply)</i> |                                                                                                    |               |   |
| 455h                                                                                  | If your child is sick with a <b>diarrhea</b> what should you do? <b>Ignore it will go away</b>     | 1=Yes<br>2=No | — |
| 456h                                                                                  | If your child is sick with a <b>diarrhea</b> what should you do? <b>Go to health centre</b>        | 1=Yes<br>2=No | — |
| 457h                                                                                  | If your child is sick with a <b>diarrhea</b> what should you do? <b>Go to HEW</b>                  | 1=Yes<br>2=No | — |
| 458h                                                                                  | If your child is sick with a <b>diarrhea</b> what should you do? <b>Go to WDA</b>                  | 1=Yes<br>2=No | — |
| 459h                                                                                  | If your child is sick with a <b>diarrhea</b> what should you do? <b>Go to traditional healer</b>   | 1=Yes<br>2=No | — |
| 460h                                                                                  | If your child is sick with a <b>diarrhea</b> what should you do? <b>Fluid made from a special</b>  | 1=Yes<br>2=No | — |

|                                                                                       |                                                                                                                            |               |   |
|---------------------------------------------------------------------------------------|----------------------------------------------------------------------------------------------------------------------------|---------------|---|
|                                                                                       | <b>packet / ordinary rehydration salts (ORS)</b>                                                                           |               |   |
| 461h                                                                                  | If your child is sick with a <b>diarrhea</b> what should you do? <b>A gov-recommended home-made fluid for diarrhoea</b>    | 1=Yes<br>2=No | — |
| 462h                                                                                  | If your child is sick with a <b>diarrhea</b> what should you do? <b>Treat with paracetamol</b>                             | 1=Yes<br>2=No | — |
| 463h                                                                                  | If your child is sick with a <b>diarrhea</b> what should you do? <b>Treat with antibiotic</b>                              | 1=Yes<br>2=No | — |
| 464h                                                                                  | If your child is sick with a <b>diarrhea</b> what should you do? <b>Treat with other medicine</b>                          | 1=Yes<br>2=No | — |
| 465h                                                                                  | If your child is sick with a <b>diarrhea</b> what should you do? <b>Other</b>                                              | Specify       | — |
| <i>Do Not read out list, prompt, 'anything else' record 1=Yes for all that apply)</i> |                                                                                                                            |               |   |
| 466h                                                                                  | If your child is sick with a <b>cough/ respiratory infection</b> what should you do? <b>Ignore it will go away</b>         | 1=Yes<br>2=No | — |
| 467h                                                                                  | If your child is sick with a <b>cough/ respiratory infection</b> what should you do? <b>Go to health centre</b>            | 1=Yes<br>2=No | — |
| 468h                                                                                  | If your child is sick with a <b>cough/ respiratory infection</b> what should you do? <b>Go to HEW</b>                      | 1=Yes<br>2=No | — |
| 469h                                                                                  | If your child is sick with a <b>cough/ respiratory infection</b> what should you do? <b>Go to WDA</b>                      | 1=Yes<br>2=No | — |
| 470h                                                                                  | If your child is sick with a <b>cough/ respiratory infection</b> what should you do? <b>Go to traditional healer</b>       | 1=Yes<br>2=No | — |
| 471h                                                                                  | If your child is sick with a <b>cough/ respiratory infection</b> what should you do? <b>Treat with antibiotic</b>          | 1=Yes<br>2=No | — |
| 472h                                                                                  | If your child is sick with a <b>cough/ respiratory infection</b> what should you do? <b>Treat with paracetamol</b>         | 1=Yes<br>2=No | — |
| 473h                                                                                  | If your child is sick with a <b>cough/ respiratory infection</b> what should you do? <b>Treat with other medicine</b>      | 1=Yes<br>2=No | — |
| 474h                                                                                  | If your child is sick with a <b>cough/ respiratory infection</b> what should you do? <b>Other action</b>                   | Specify       | — |
| <i>Do Not read out list, prompt, 'anything else' record 1=Yes for all that apply)</i> |                                                                                                                            |               |   |
| 475h                                                                                  | What are the signs of illness for a newborn baby? <b>Reduced feeding</b>                                                   | 1=Yes<br>2=No | — |
| 476h                                                                                  | What are the signs of illness for a newborn baby? <b>Difficult or fast breathing</b>                                       | 1=Yes<br>2=No | — |
| 477h                                                                                  | What are the signs of illness for a newborn baby? <b>Movement only when stimulated or No movement even when stimulated</b> | 1=Yes<br>2=No | — |



|                                                                                                                                                                                                   |                                                                                                                      |               |   |
|---------------------------------------------------------------------------------------------------------------------------------------------------------------------------------------------------|----------------------------------------------------------------------------------------------------------------------|---------------|---|
| 478h                                                                                                                                                                                              | What are the signs of illness for a newborn baby? <b>Unusually hot or cold</b>                                       | 1=Yes<br>2=No | — |
| 479h                                                                                                                                                                                              | What are the signs of illness for a newborn baby? <b>Convulsions</b>                                                 | 1=Yes<br>2=No | — |
| 480h                                                                                                                                                                                              | What are the signs of illness for a newborn baby? <b>Severe chest in-drawing</b>                                     | 1=Yes<br>2=No | — |
| 481h                                                                                                                                                                                              | What are the signs of illness for a newborn baby? <b>Yellow palms/soles/eyes</b>                                     | 1=Yes<br>2=No | — |
| 482h                                                                                                                                                                                              | What are the signs of illness for a newborn baby? <b>Diarrhea</b>                                                    | 1=Yes<br>2=No | — |
| 483h                                                                                                                                                                                              | What are the signs of illness for a newborn baby? <b>Skin pustules</b>                                               | 1=Yes<br>2=No | — |
| 484h                                                                                                                                                                                              | What are the signs of illness for a newborn baby? <b>Cord red or draining puss</b>                                   | 1=Yes<br>2=No | — |
| 485h                                                                                                                                                                                              | What are the signs of illness for a newborn baby? <b>Small infant (weight &lt;2000 grams)</b>                        | 1=Yes<br>2=No | — |
| <i>Symptoms are: reduced feeding, difficult or fast breathing, Movement only when stimulated or No movement even when stimulated, unusually hot or cold, convulsions, severe chest in-drawing</i> |                                                                                                                      |               |   |
| 486h                                                                                                                                                                                              | If your newborn child has <b>symptoms of neonatal sepsis</b> what should you do?<br><b>Ignore it will go away</b>    | 1=Yes<br>2=No | — |
| 487h                                                                                                                                                                                              | If your newborn child has <b>symptoms of neonatal sepsis</b> what should you do?<br><b>Go to health centre</b>       | 1=Yes<br>2=No | — |
| 488h                                                                                                                                                                                              | If your newborn child has <b>symptoms of neonatal sepsis</b> what should you do?<br><b>Go to HEW</b>                 | 1=Yes<br>2=No | — |
| 489h                                                                                                                                                                                              | If your newborn child has <b>symptoms of neonatal sepsis</b> what should you do?<br><b>Go to WDA</b>                 | 1=Yes<br>2=No | — |
| 490h                                                                                                                                                                                              | If your newborn child has <b>symptoms of neonatal sepsis</b> what should you do?<br><b>Go to traditional healer</b>  | 1=Yes<br>2=No | — |
| 491h                                                                                                                                                                                              | If your newborn child has <b>symptoms of neonatal sepsis</b> what should you do?<br><b>Treat with antibiotic</b>     | 1=Yes<br>2=No | — |
| 492h                                                                                                                                                                                              | If your newborn child has <b>symptoms of neonatal sepsis</b> what should you do?<br><b>Treat with paracetamol</b>    | 1=Yes<br>2=No | — |
| 493h                                                                                                                                                                                              | If your newborn child has <b>symptoms of neonatal sepsis</b> what should you do?<br><b>Treat with other medicine</b> | 1=Yes<br>2=No | — |
| 494h                                                                                                                                                                                              | If your newborn child has <b>symptoms of neonatal sepsis</b> what should you do?<br><b>Other action</b>              | Specify       | — |

| <b>Section 3.3: Health care available in kebele and recent interactions</b>                           |                                                                                                                                                                        |                                                                                                                                                                                                                                                                                                                                                                          |         |
|-------------------------------------------------------------------------------------------------------|------------------------------------------------------------------------------------------------------------------------------------------------------------------------|--------------------------------------------------------------------------------------------------------------------------------------------------------------------------------------------------------------------------------------------------------------------------------------------------------------------------------------------------------------------------|---------|
| 495h                                                                                                  | Is there a health post in your kebele?                                                                                                                                 | 1= Yes<br>2=No <b>SKIP TO 506</b>                                                                                                                                                                                                                                                                                                                                        | —       |
| 496h                                                                                                  | How long does it take you to walk to the nearest health post?                                                                                                          | <i>Record the distance in minutes.<br/>If don't know, record 99</i>                                                                                                                                                                                                                                                                                                      | —       |
| 497h                                                                                                  | How many times have you visited the health post in the last six months?                                                                                                | <i>Record the number of times<br/>If any visits last 6 months,<br/><b>SKIP TO 504</b></i>                                                                                                                                                                                                                                                                                | —       |
| <i>Do Not read out list, prompt, 'anything else' record 1=Yes for all that apply then SKIP TO 504</i> |                                                                                                                                                                        |                                                                                                                                                                                                                                                                                                                                                                          |         |
| 498h                                                                                                  | If never in the last 6 months: What are the reasons why you have Not visited the health post in the last six months? <b>No illness in the family/No births</b>         | 1=Yes<br>2=No                                                                                                                                                                                                                                                                                                                                                            | —       |
| 499h                                                                                                  | If never in the last 6 months: What are the reasons why you have Not visited the health post in the last six months? <b>Health post is too far away</b>                | 1=Yes<br>2=No                                                                                                                                                                                                                                                                                                                                                            | —       |
| 500h                                                                                                  | If never in the last 6 months: What are the reasons why you have Not visited the health post in the last six months? <b>health post Costs too much to go to</b>        | 1=Yes<br>2=No                                                                                                                                                                                                                                                                                                                                                            | —       |
| 501h                                                                                                  | If never in the last 6 months: What are the reasons why you have Not visited the health post in the last six months? <b>Not enough time to visit</b>                   | 1=Yes<br>2=No                                                                                                                                                                                                                                                                                                                                                            | —       |
| 502h                                                                                                  | If never in the last 6 months: What are the reasons why you have Not visited the health post in the last six months? <b>Poor services available at the health post</b> | 1=Yes<br>2=No                                                                                                                                                                                                                                                                                                                                                            | —       |
| 503h                                                                                                  | If never in the last 6 months: What are the reasons why you have Not visited the health post in the last six months? <b>Other</b>                                      | Specify                                                                                                                                                                                                                                                                                                                                                                  | _____   |
| 504h                                                                                                  | When was the last time you visited that health post?                                                                                                                   | <i>Record DD/MM. If don't know<br/>99/99. If know month but Not day<br/>record 99/MM</i>                                                                                                                                                                                                                                                                                 | ___/___ |
| 505h                                                                                                  | The last time you visited the health post, what was the primary reason?                                                                                                | 01=Family planning<br>02=Child immunisation<br>03=Antenatal care<br>04=Delivery care<br>05=Postnatal care<br>06=Neonatal care<br>07=Health education<br>08=Growth monitoring<br>09=Referral of sick child<br>10=Diarrhea treatment<br>11=Malaria treatment<br>13=Pneumonia treatment<br>14=other treatment of sickness<br>15=receive mosquito nets<br>88=other (specify) | —       |
| 506h                                                                                                  | Is there another health facility in your kebele?                                                                                                                       | 1= Yes<br>2=No <b>SKIP TO 518</b>                                                                                                                                                                                                                                                                                                                                        | —       |
| 507h                                                                                                  | What kind of a health facility                                                                                                                                         | 1=Health Centre<br>2=Hospital                                                                                                                                                                                                                                                                                                                                            | —       |

|                                                                                                              |                                                                                                                                                                                |                                                                                                                                                                                                                                                                                                                                                                           |         |
|--------------------------------------------------------------------------------------------------------------|--------------------------------------------------------------------------------------------------------------------------------------------------------------------------------|---------------------------------------------------------------------------------------------------------------------------------------------------------------------------------------------------------------------------------------------------------------------------------------------------------------------------------------------------------------------------|---------|
|                                                                                                              |                                                                                                                                                                                | 3=Private clinic<br>8=Other                                                                                                                                                                                                                                                                                                                                               |         |
| 508h                                                                                                         | How long does it take you to walk to the nearest health facility?                                                                                                              | <i>Record the distance in minutes. If don't know, record 99</i>                                                                                                                                                                                                                                                                                                           | _____   |
| 509h                                                                                                         | How many times have you visited the health facility in the last 6 months?                                                                                                      | <i>Record the number of times<br/>If any visits last 6 months,<br/><b>SKIP TO 516</b></i>                                                                                                                                                                                                                                                                                 | ___     |
| <b>Do Not read out list, prompt, 'anything else' record 1=Yes for all that apply Then <b>SKIP TO 516</b></b> |                                                                                                                                                                                |                                                                                                                                                                                                                                                                                                                                                                           |         |
| 510h                                                                                                         | If never in the last 6 months: What are the reasons why you have Not visited the health facility in the last six months?<br><b>No illness in the family/No births</b>          | 1=Yes<br>2=No                                                                                                                                                                                                                                                                                                                                                             | ___     |
| 511h                                                                                                         | If never in the last 6 months: What are the reasons why you have Not visited the health facility in the last six months?<br><b>Health facility is too far away</b>             | 1=Yes<br>2=No                                                                                                                                                                                                                                                                                                                                                             | ___     |
| 512h                                                                                                         | If never in the last 6 months: What are the reasons why you have Not visited the health facility in the last six months?<br><b>Costs too much to go to health post</b>         | 1=Yes<br>2=No                                                                                                                                                                                                                                                                                                                                                             | ___     |
| 513h                                                                                                         | If never in the last 6 months: What are the reasons why you have Not visited the health facility in the last six months?<br><b>Not enough time to visit</b>                    | 1=Yes<br>2=No                                                                                                                                                                                                                                                                                                                                                             | ___     |
| 514h                                                                                                         | If never in the last 6 months: What are the reasons why you have Not visited the health facility in the last six months? <b>Poor services available at the health facility</b> | 1=Yes<br>2=No                                                                                                                                                                                                                                                                                                                                                             | ___     |
| 515h                                                                                                         | If never in the last 6 months: What are the reasons why you have Not visited the health facility in the last six months? <b>Other</b>                                          | Specify                                                                                                                                                                                                                                                                                                                                                                   | _____   |
| 516h                                                                                                         | When was the last time you visited that health facility?                                                                                                                       | <i>Record DD/MM. If don't know 99/99. If know month but Not day record 99/MM</i>                                                                                                                                                                                                                                                                                          | ___/___ |
| 517h                                                                                                         | The last time you visited the health facility, what was the primary reason?                                                                                                    | 01=Family planning<br>02=Child immunisation<br>03=Antenatal care<br>04=Delivery care<br>05=Postnatal care<br>06=Neonatal care<br>07=Health education<br>08=Growth monitoring<br>09=Referral of sick child<br>10=Diarrhoea treatment<br>11=Malaria treatment<br>13=Pneumonia treatment<br>14=Other treatment of sickness<br>15=Receive mosquito nets<br>88=Other (specify) | _____   |
| 518h                                                                                                         | Have you been visited at home during the past 6 months by a Health Extension Worker to talk about health related issues?                                                       | 1= Yes<br>2=No<br><b>SKIP TO 537</b>                                                                                                                                                                                                                                                                                                                                      | ___     |
| 519h                                                                                                         | When was the last time the HEW visited you at home?                                                                                                                            | <i>Record DD/MM. If don't know 99/99. If know month but Not day record 99/MM</i>                                                                                                                                                                                                                                                                                          | ___/___ |
| <b>Do Not read out list, prompt, 'anything else' record 1=Yes for all that apply</b>                         |                                                                                                                                                                                |                                                                                                                                                                                                                                                                                                                                                                           |         |

|                                                                                      |                                                                                                    |                                                                                                        |   |
|--------------------------------------------------------------------------------------|----------------------------------------------------------------------------------------------------|--------------------------------------------------------------------------------------------------------|---|
| 520h                                                                                 | Who did the HEW talk to the last time she visited you at home? <b>Myself</b>                       | 1=Yes<br>2=No                                                                                          | — |
| 521h                                                                                 | Who did the HEW talk to the last time she visited you at home? <b>Other adult woman</b>            | 1=Yes<br>2=No                                                                                          | — |
| 522h                                                                                 | Who did the HEW talk to the last time she visited you at home? <b>Head of household</b>            | 1=Yes<br>2=No                                                                                          | — |
| 523h                                                                                 | Who did the HEW talk to the last time she visited you at home? <b>Other adult male</b>             | 1=Yes<br>2=No                                                                                          | — |
| <i>Do Not read out list, prompt, 'anything else' record 1=Yes for all that apply</i> |                                                                                                    |                                                                                                        |   |
| 524h                                                                                 | What was discussed the last time the HEW visited you at home? <b>Immunisation</b>                  | 1= Yes<br>2=No                                                                                         | — |
| 525h                                                                                 | What was discussed the last time the HEW visited you at home? <b>Child nutrition</b>               | 1=Yes<br>2=No                                                                                          | — |
| 526h                                                                                 | What was discussed the last time the HEW visited you at home? <b>Family planning</b>               | 1=Yes<br>2=No                                                                                          | — |
| 527h                                                                                 | What was discussed the last time the HEW visited you at home? <b>Pregnancy care</b>                | 1=Yes<br>2=No                                                                                          | — |
| 528h                                                                                 | What was discussed the last time the HEW visited you at home? <b>Delivery care</b>                 | 1=Yes<br>2=No                                                                                          | — |
| 529h                                                                                 | What was discussed the last time the HEW visited you at home? <b>Newborn care / postnatal care</b> | 1=Yes<br>2=No                                                                                          | — |
| 530h                                                                                 | What was discussed the last time the HEW visited you at home? <b>Information about HIV/AIDS</b>    | 1=Yes<br>2=No                                                                                          | — |
| 531h                                                                                 | What was discussed the last time the HEW visited you at home? <b>Information on hygiene</b>        | 1=Yes<br>2=No                                                                                          | — |
| 532h                                                                                 | What was discussed the last time the HEW visited you at home? <b>Diarrhea treatment</b>            | 1=Yes<br>2=No                                                                                          | — |
| 533h                                                                                 | What was discussed the last time the HEW visited you at home? <b>Malaria treatment</b>             | 1=Yes<br>2=No                                                                                          | — |
| 534h                                                                                 | What was discussed the last time the HEW visited you at home? <b>Pneumonia treatment</b>           | 1=Yes<br>2=No                                                                                          | — |
| 535h                                                                                 | What was discussed the last time the HEW visited you at home? <b>Promotion of latrine use</b>      | 1=Yes<br>2=No                                                                                          | — |
| 536h                                                                                 | What was discussed the last time the HEW visited you at home? <b>Promotion of safe water use</b>   | 1=Yes<br>2=No                                                                                          | — |
| <i>Do Not read out list, prompt, 'anything else' record 1=Yes for all that apply</i> |                                                                                                    |                                                                                                        |   |
| 537h                                                                                 | Are you aware of women development army who visit people at home to talk about health issues?      | 1= Yes<br>2=No                                                                                         | — |
| 538h                                                                                 | If Yes When was the last time the WDA visited you at home?                                         | <b>SKIP TO 556</b><br><i>Record DD/MM. If don't know 99/99. If know month but Not day record 99/MM</i> | — |
| <i>Do Not read out list, prompt, 'anything else' record 1=Yes for all that apply</i> |                                                                                                    |                                                                                                        |   |
| 539h                                                                                 | Who did the WDA talk to at that last visited to your home? <b>Myself</b>                           | 1=Yes<br>2=No                                                                                          | — |
| 540h                                                                                 | Who did the WDA talk to at that last visited to your home? <b>Other adult woman</b>                | 1=Yes<br>2=No                                                                                          | — |
| 541h                                                                                 | Who did the WDA talk to at that last visited to your home? <b>Head of household</b>                | 1=Yes<br>2=No                                                                                          | — |
| 542h                                                                                 | Who did the WDA talk to at that last visited to your home? <b>Other adult male</b>                 | 1=Yes<br>2=No                                                                                          | — |
| <i>Do Not read out list, prompt, 'anything else' record 1=Yes for all that apply</i> |                                                                                                    |                                                                                                        |   |
| 543h                                                                                 | What was discussed the last time the WDA visited you at home? <b>Immunisation</b>                  | 1=Yes<br>2=No                                                                                          | — |
| 544h                                                                                 | What was discussed the last time the WDA visited you at home? <b>Child nutrition</b>               | 1=Yes<br>2=No                                                                                          | — |

|                                                                                      |                                                                                                                                                                      |                                                                                                                     |                         |
|--------------------------------------------------------------------------------------|----------------------------------------------------------------------------------------------------------------------------------------------------------------------|---------------------------------------------------------------------------------------------------------------------|-------------------------|
| 545h                                                                                 | What was discussed the last time the WDA visited you at home? <b>Family planning</b>                                                                                 | 1=Yes<br>2=No                                                                                                       | —                       |
| 546h                                                                                 | What was discussed the last time the WDA visited you at home? <b>Pregnancy care</b>                                                                                  | 1=Yes<br>2=No                                                                                                       | —                       |
| 547h                                                                                 | What was discussed the last time the WDA visited you at home? <b>Delivery care</b>                                                                                   | 1=Yes<br>2=No                                                                                                       | —                       |
| 548h                                                                                 | What was discussed the last time the WDA visited you at home? <b>Newborn care / postnatal care</b>                                                                   | 1=Yes<br>2=No                                                                                                       | —                       |
| 549h                                                                                 | What was discussed the last time the WDA visited you at home? <b>Information about HIV/AIDS</b>                                                                      | 1=Yes<br>2=No                                                                                                       | —                       |
| 550h                                                                                 | What was discussed the last time the WDA visited you at home? <b>Information on hygiene</b>                                                                          | 1=Yes<br>2=No                                                                                                       | —                       |
| 551h                                                                                 | What was discussed the last time the WDA visited you at home? <b>Diarrhoea treatment</b>                                                                             | 1=Yes<br>2=No                                                                                                       | —                       |
| 552h                                                                                 | What was discussed the last time the WDA visited you at home? <b>Malaria treatment</b>                                                                               | 1=Yes<br>2=No                                                                                                       | —                       |
| 553h                                                                                 | What was discussed the last time the WDA visited you at home? <b>Pneumonia treatment</b>                                                                             | 1=Yes<br>2=No                                                                                                       | —                       |
| 554h                                                                                 | What was discussed the last time the WDA visited you at home? <b>Promotion of latrine use</b>                                                                        | 1=Yes<br>2=No                                                                                                       | —                       |
| 555h                                                                                 | What was discussed the last time the WDA visited you at home? <b>Promotion of safe water use</b>                                                                     | 1=Yes<br>2=No                                                                                                       | —                       |
| 556h                                                                                 | Have you participated in developing local community-based action plan addressing maternal newborn and child health issues about health issues in the past 12 months? | 1= Yes<br>2=No                                                                                                      | <b>SKIP TO 559</b><br>— |
| 557h                                                                                 | If Yes: When did you last participate in a community-based action plan?                                                                                              | <i>Record DD/MM. If don't know 99/99. If know month but Not day record 99/MM</i>                                    | ___/___                 |
| 558h                                                                                 | Who organized the community-based action plan?                                                                                                                       | 1=Kebele health team<br>2=Health extension worker<br>3=Community health worker<br>8=other (specify)<br>9=don't know | —                       |
| 559h                                                                                 | Have you attended any meetings in your community (outside your home) about health issues in the past 12 months?                                                      | 1= Yes<br>2=No                                                                                                      | <b>SKIP TO 575</b><br>— |
| 560h                                                                                 | If Yes: When was the last meeting you attended outside your home?                                                                                                    | <i>Record DD/MM. If don't know 99/99. If know month but Not day record 99/MM</i>                                    | ___/___                 |
| 561h                                                                                 | Who organised the last meeting?                                                                                                                                      | 1=Kebele health team<br>2=Health extension worker<br>3=Community health worker<br>8=other (specify)<br>9=don't know | —                       |
| <i>Do Not read out list, prompt, 'anything else' record 1=Yes for all that apply</i> |                                                                                                                                                                      |                                                                                                                     |                         |
| 562h                                                                                 | What was discussed at the last community meeting you attended outside your home? <b>Immunisation</b>                                                                 | 1= Yes<br>2=No                                                                                                      | —                       |
| 563h                                                                                 | What was discussed at the last community meeting you attended outside your home? <b>Child nutrition</b>                                                              | 1= Yes<br>2=No                                                                                                      | —                       |
| 564h                                                                                 | What was discussed at the last community meeting you attended outside your home? <b>Family planning</b>                                                              | 1= Yes<br>2=No                                                                                                      | —                       |
| 565h                                                                                 | What was discussed at the last community meeting you attended outside your home?                                                                                     | 1= Yes<br>2=No                                                                                                      | —                       |

|      |                                                                                                                          |                |   |
|------|--------------------------------------------------------------------------------------------------------------------------|----------------|---|
|      | <b>Pregnancy care</b>                                                                                                    |                |   |
| 566h | What was discussed at the last community meeting you attended outside your home?<br><b>Delivery care</b>                 | 1= Yes<br>2=No | — |
| 567h | What was discussed at the last community meeting you attended outside your home?<br><b>Newborn care / postnatal care</b> | 1= Yes<br>2=No | — |
| 568h | What was discussed at the last community meeting you attended outside your home?<br><b>Information about HIV/AIDS</b>    | 1= Yes<br>2=No | — |
| 569h | What was discussed at the last community meeting you attended outside your home?<br><b>Information on hygiene</b>        | 1= Yes<br>2=No | — |
| 570h | What was discussed at the last community meeting you attended outside your home?<br><b>Diarrhea treatment</b>            | 1= Yes<br>2=No | — |
| 571h | What was discussed at the last community meeting you attended outside your home?<br><b>Malaria treatment</b>             | 1= Yes<br>2=No | — |
| 572h | What was discussed at the last community meeting you attended outside your home?<br><b>Pneumonia treatment</b>           | 1= Yes<br>2=No | — |
| 573h | What was discussed at the last community meeting you attended outside your home?<br><b>Promotion of latrine use</b>      | 1= Yes<br>2=No | — |
| 574h | What was discussed at the last community meeting you attended outside your home?<br><b>Promotion of safe water use</b>   | 1= Yes<br>2=No | — |

### Section 3.4: Identification of child & general questions

*The following questions are to be asked for all under 5 years old. Start with the youngest*

|      |                                                                                      |                                                            |       |
|------|--------------------------------------------------------------------------------------|------------------------------------------------------------|-------|
| 575h | <b>Interviewer:</b> What is the name of the youngest child?                          | Check household listing                                    | _____ |
| 576h | <b>Interviewer:</b> select ID of the child from household listing                    |                                                            | _____ |
| 577h | Did you ever breastfeed [name]? OR Was [name] breastfed?                             | 1=Yes<br>2=No<br>9=Don't know                              | —     |
| 578h | Are you still breastfeeding [name]? OR Is [name] still being breastfed?              | 1=Yes<br>2=No<br>9=Don't know                              | —     |
| 579h | For how many months did you breastfeed? OR For how many months was [name] breastfed? | Record number of months. If don't know record 98           | —     |
| 580h | Did [name] receive a vitamin A dose (like this) during the last 6 months?            | Show ampule/capsule/syrup<br>1=Yes<br>2=No<br>9=Don't know | —     |

### Section 3.5: Immunizations

|                                                                                                                            |                                                                                        |                                                                                            |                                         |
|----------------------------------------------------------------------------------------------------------------------------|----------------------------------------------------------------------------------------|--------------------------------------------------------------------------------------------|-----------------------------------------|
| 581h                                                                                                                       | Do you have a card where [name's] vaccinations are written down? If Yes, may I see it? | 1=Yes seen <b>SKIP TO 583</b><br>2=Yes Not seen <b>SKIP TO 599</b><br>3=No<br>9=Don't know | —                                       |
| 582h                                                                                                                       | If No card, did you ever have a vaccination card?                                      | 1=Yes<br>2=No<br>9=Don't know                                                              | —<br>If ALL answered <b>SKIP TO 599</b> |
| <i>Record 44 in the DAY column if card shows that a vaccination was given but No date is recorded.) Record DD/MM/YYYY.</i> |                                                                                        |                                                                                            |                                         |
| 583h                                                                                                                       | Copy vaccination date for <b>BCG</b> from the card                                     | ___/___/_____                                                                              |                                         |
| 584h                                                                                                                       | Copy vaccination date for <b>Polio 0 (Polio given at birth)</b> from the card          | ___/___/_____                                                                              |                                         |
| 585h                                                                                                                       | Copy vaccination date for <b>Polio 1</b> from the card                                 | ___/___/_____                                                                              |                                         |
| 586h                                                                                                                       | Copy vaccination date for <b>Polio 2</b> from the card                                 | ___/___/_____                                                                              |                                         |
| 587h                                                                                                                       | Copy vaccination date for <b>Polio 3</b> from the card                                 | ___/___/_____                                                                              |                                         |
| 588h                                                                                                                       | Copy vaccination date for <b>Pentavalent (DPT, HIV, Hep B)</b> from the card           | ___/___/_____                                                                              |                                         |
| 589h                                                                                                                       | Copy vaccination date for <b>Pentavalent 2</b> from the card                           | ___/___/_____                                                                              |                                         |
| 590h                                                                                                                       | Copy vaccination date for <b>Pentavalent 3</b> from the card                           | ___/___/_____                                                                              |                                         |
| 591h                                                                                                                       | Copy vaccination date for <b>PCV 1</b> from the card                                   | ___/___/_____                                                                              |                                         |

|                                                                                                  |                                                                                                                                     |                               |                                                                                                      |
|--------------------------------------------------------------------------------------------------|-------------------------------------------------------------------------------------------------------------------------------------|-------------------------------|------------------------------------------------------------------------------------------------------|
| 592h                                                                                             | Copy vaccination date for <b>PCV 2</b> from the card                                                                                | ___/___/_____                 |                                                                                                      |
| 593                                                                                              | Copy vaccination date for <b>Rota 1</b> from the card                                                                               | ___/___/_____                 |                                                                                                      |
| 594                                                                                              | Copy vaccination date for <b>Rota 2</b> from the card                                                                               | ___/___/_____                 |                                                                                                      |
| 595                                                                                              | Copy vaccination date for <b>Rota 3</b> from the card                                                                               | ___/___/_____                 |                                                                                                      |
| 596                                                                                              | Copy vaccination date for <b>Measles</b> from the card                                                                              | ___/___/_____                 |                                                                                                      |
| 597                                                                                              | Copy vaccination date for <b>Vitamin A</b> from the card                                                                            | ___/___/_____                 |                                                                                                      |
| 598                                                                                              | Copy vaccination date for <b>Deworming</b> from the card                                                                            | ___/___/_____                 |                                                                                                      |
| <i>Ask and fill this question, only if the vaccination status in the card is empty (583-598)</i> |                                                                                                                                     |                               |                                                                                                      |
| 599h                                                                                             | Did [name] receive any vaccinations that are not on this card, including vaccinations received in a national immunization campaign? | 1=Yes<br>2=No<br>9=Don't know | <i>Record Yes only if respondent mentions BCG, Polio 0-3, Pentavalent, and/or measles vaccine(s)</i> |
| 600h                                                                                             | Did [name] receive <b>BCG</b> ?                                                                                                     | 1=Yes<br>2=No<br>9=Don't know | —                                                                                                    |
| 601h                                                                                             | Did [name] receive <b>Polio 0 (Polio given at birth)</b> ?                                                                          | 1=Yes<br>2=No<br>9=Don't know | —                                                                                                    |
| 602h                                                                                             | Did [name] receive <b>Polio 1</b> ?                                                                                                 | 1=Yes<br>2=No<br>9=Don't know | —                                                                                                    |
| 603h                                                                                             | Did [name] receive <b>Polio 2</b> ?                                                                                                 | 1=Yes<br>2=No<br>9=Don't know | —                                                                                                    |
| 604h                                                                                             | Did [name] receive <b>Polio 3</b> ?                                                                                                 | 1=Yes<br>2=No<br>9=Don't know | —                                                                                                    |
| 605h                                                                                             | Did [name] receive <b>Pentavalent (DPT, HIV, Hep B)</b> ?                                                                           | 1=Yes<br>2=No<br>9=Don't know | —                                                                                                    |
| 606h                                                                                             | Did [name] receive <b>Pentavalent 2</b> ?                                                                                           | 1=Yes<br>2=No<br>9=Don't know | —                                                                                                    |
| 607h                                                                                             | Did [name] receive <b>Pentavalent 3</b> ?                                                                                           | 1=Yes<br>2=No<br>9=Don't know | —                                                                                                    |
| 608h                                                                                             | Did [name] receive <b>PCV 1</b> ?                                                                                                   | 1=Yes<br>2=No<br>9=Don't know | —                                                                                                    |
| 609h                                                                                             | Did [name] receive <b>PCV 2</b> ?                                                                                                   | 1=Yes<br>2=No<br>9=Don't know | —                                                                                                    |
| 610h                                                                                             | Did [name] receive <b>Rota 1</b> ?                                                                                                  | 1=Yes<br>2=No<br>9=Don't know | —                                                                                                    |



|                                                                             |                                                                                                                                                        |                                                                 |   |
|-----------------------------------------------------------------------------|--------------------------------------------------------------------------------------------------------------------------------------------------------|-----------------------------------------------------------------|---|
| 611h                                                                        | Copy vaccination date for <b>Rota 2</b> ?                                                                                                              | 1=Yes<br>2=No<br>9=Don't know                                   | — |
| 612h                                                                        | Did [name] receive <b>Rota 3</b> ?                                                                                                                     | 1=Yes<br>2=No<br>9=Don't know                                   | — |
| 613h                                                                        | Did [name] receive <b>Measles</b> ?                                                                                                                    | 1=Yes<br>2=No<br>9=Don't know                                   | — |
| 614h                                                                        | Did [name] receive <b>Vitamin A</b> ?                                                                                                                  | 1=Yes<br>2=No<br>9=Don't know                                   | — |
| 615h                                                                        | Did [name] receive <b>Deworming</b> ?                                                                                                                  | 1=Yes<br>2=No<br>9=Don't know                                   | — |
| 616h                                                                        | Did [name] ever receive any vaccinations to prevent him/her getting diseases, including vaccinations received in a national immunization day campaign? | 1=Yes<br>2=No<br>9=Don't know                                   | — |
| <b>Please tell me if [name] received any of the following vaccinations:</b> |                                                                                                                                                        |                                                                 |   |
| 617h                                                                        | A BCG vaccination against tuberculosis, that is an injection in the arm or shoulder that usually causes a scar?                                        | 1=Yes<br>2=No<br>9=Don't know                                   | — |
| 618h                                                                        | A POLIO vaccination, that is drops in the mouth?                                                                                                       | 1=Yes<br>2=No<br>9=Don't know                                   | — |
| 619h                                                                        | When was the first polio vaccine received, just after birth or later?                                                                                  | 1=just after birth<br>2=later                                   | — |
| 620h                                                                        | How many times was the polio vaccine received?                                                                                                         | Record number.<br>9=don't know                                  | — |
| 621h                                                                        | A PENTAVALENT vaccination, which is an injection given in the thigh or buttocks, sometimes at the same time as the polio drops?                        | 1=Yes<br>2=No<br>9=Don't know                                   | — |
| 622h                                                                        | How many times was pentavalent received?                                                                                                               | <i>Record number.</i><br><i>9=don't know</i>                    | — |
| 623h                                                                        | An injection to prevent MEASLES, usually in the upper left arm?                                                                                        | 1=Yes<br>2=No<br>9=Don't know                                   | — |
| 624h                                                                        | Has [name] had any illness at any time in the last 2 weeks?                                                                                            | 1=Yes<br>2=No <b>Go to 718</b><br>9=Don't know <b>Go to 718</b> | — |

1  
2  
3  
4  
5  
6  
7  
8  
9  
10  
11  
12  
13  
14  
15  
16  
17  
18  
19  
20  
21  
22  
23  
24  
25  
26  
27  
28  
29  
30  
31  
32  
33  
34  
35  
36  
37  
38  
39  
40  
41  
42  
43  
44  
45  
46  
47  
48  
49  
50  
51  
52  
53  
54  
55  
56  
57  
58  
59  
60

| <b>Section 3.6: Two-Week Morbidity Module (symptoms, care seeking and drugs)</b>                                                                           |                                                                                                                              |                                                            |   |
|------------------------------------------------------------------------------------------------------------------------------------------------------------|------------------------------------------------------------------------------------------------------------------------------|------------------------------------------------------------|---|
| <b>FILL IN THE MODULE BELOW IF THE CHILD WAS ILL IN THE PREVIOUS TWO WEEKS. IF THE CHILD HAD MORE THAN ONE EPISODE, CONSIDER ONLY THE MOST RECENT ONE.</b> |                                                                                                                              |                                                            |   |
| 625h                                                                                                                                                       | For how many days was [name] ill?                                                                                            | <i>If less than one day record 00<br/>99 if don't know</i> | — |
| 626h                                                                                                                                                       | Is [name] ill Now?                                                                                                           | 1=Yes<br>2=No                                              | — |
| <b>Symptoms</b>                                                                                                                                            |                                                                                                                              |                                                            |   |
| 627h                                                                                                                                                       | Did [name] have any of the following at any time in the last 2 weeks? <b>Convulsions</b>                                     | 1=Yes<br>2=No                                              | — |
| 628h                                                                                                                                                       | Did [name] have any of the following at any time in the last 2 weeks? <b>Very sleepy</b>                                     | 1=Yes<br>2=No                                              | — |
| 629h                                                                                                                                                       | Did [name] have any of the following at any time in the last 2 weeks? <b>Vomiting everything</b>                             | 1=Yes<br>2=No                                              | — |
| 630h                                                                                                                                                       | Did [name] have any of the following at any time in the last 2 weeks? <b>Drinking poorly/Not able to drink or breastfeed</b> | 1=Yes<br>2=No                                              | — |
| 631h                                                                                                                                                       | Did [name] have any of the following at any time in the last 2 weeks? <b>Fever</b>                                           | 1=Yes<br>2=No                                              | — |
| 632h                                                                                                                                                       | Did [name] have any of the following at any time in the last 2 weeks? <b>Cough</b>                                           | 1=Yes<br>2=No                                              | — |
| 633h                                                                                                                                                       | Did [name] have any of the following at any time in the last 2 weeks? <b>Difficult breathing</b>                             | 1=Yes<br>2=No                                              | — |
| 634h                                                                                                                                                       | Did [name] have any of the following at any time in the last 2 weeks? <b>Diarrhea</b>                                        | 1=Yes<br>2=No                                              | — |
| 635h                                                                                                                                                       | Did [name] have any of the following at any time in the last 2 weeks? <b>Ear pain</b>                                        | 1=Yes<br>2=No                                              | — |
| 636h                                                                                                                                                       | Did [name] have any of the following at any time in the last 2 weeks? <b>Loss of appetite</b>                                | 1=Yes<br>2=No                                              | — |
| 637h                                                                                                                                                       | Did [name] have any of the following at any time in the last 2 weeks? <b>Blocked or runny Nose</b>                           | 1=Yes<br>2=No                                              | — |
| 638h                                                                                                                                                       | Did [name] have any of the following at any time in the last 2 weeks? <b>Fast breathing</b>                                  | 1=Yes<br>2=No                                              | — |
| 639h                                                                                                                                                       | Did [name] have any of the following at any time in the last 2 weeks? <b>Eye problems</b>                                    | 1=Yes<br>2=No                                              | — |
| 640h                                                                                                                                                       | Did [name] have any of the following at any time in the last 2 weeks? <b>Generalized rash</b>                                | 1=Yes<br>2=No                                              | — |
| 641h                                                                                                                                                       | Did [name] have any of the following at any time in the last 2 weeks? <b>Other signs/symptoms</b>                            | 1=Yes<br>2=No                                              | — |
| 642h                                                                                                                                                       | How many days ago did this start                                                                                             | <i>If less than one day record 00<br/>99 if don't know</i> | — |
| <i>If symptoms Fast Breathing or Difficult Breathing were selected ask the following question:</i>                                                         |                                                                                                                              |                                                            |   |
| 643h                                                                                                                                                       | Were symptoms of fast or difficult breathing due to problem in the chest or to a blocked Nose?                               | 1=Chest<br>2=Nose<br>3=Both                                | — |

|                                                              |                                                                                                                                                                                                                                                                      |                                                                                                    |                                          |
|--------------------------------------------------------------|----------------------------------------------------------------------------------------------------------------------------------------------------------------------------------------------------------------------------------------------------------------------|----------------------------------------------------------------------------------------------------|------------------------------------------|
|                                                              |                                                                                                                                                                                                                                                                      | 8= Other<br>9=Don't know                                                                           |                                          |
| <i>If Diarrhea was selected ask the following questions:</i> |                                                                                                                                                                                                                                                                      |                                                                                                    |                                          |
| 644h                                                         | When [name] was sick with diarrhea, how many watery stools did [name] have?                                                                                                                                                                                          | If less than one day record 00<br>99 if don't know                                                 | —                                        |
| 645h                                                         | During the diarrhea, did [name] have?<br><b>Repeated vomiting</b>                                                                                                                                                                                                    | 1=Yes<br>2=No                                                                                      | —                                        |
| 646h                                                         | During the diarrhea, did [name] have?<br><b>Marked thirst</b>                                                                                                                                                                                                        | 1=Yes<br>2=No                                                                                      | —                                        |
| 647h                                                         | During the diarrhea, did [name] have?<br><b>Not eating/drinking well</b>                                                                                                                                                                                             | 1=Yes<br>2=No                                                                                      | —                                        |
| 648h                                                         | During the diarrhea, did [name] have?<br><b>Blood in the stool</b>                                                                                                                                                                                                   | 1=Yes<br>2=No                                                                                      | —                                        |
| 649h                                                         | During the diarrhea, did [name] have?<br><b>Not getting better/getting sicker</b>                                                                                                                                                                                    | 1=Yes<br>2=No                                                                                      | —                                        |
| 650h                                                         | Now I would like to know how much [name] was offered to drink during the diarrhoea. Was he/she given less to drink than usual, more than usual, or about the same amount?<br>If less, probe: was he/she given <i>much less than usual to drink or somewhat less.</i> | 1=Much less<br>2=Somewhat less<br>3=About the same<br>4=More<br>5=Nothing to drink<br>9=Don't know | —                                        |
| 651h                                                         | When [name] had diarrhea, was he/she given less to eat than usual, more than usual, or about the same amount?<br>If less, probe: was he/she given <i>much less than usual to eat or somewhat less.</i>                                                               | 1=Much less<br>2=Somewhat less<br>3=About the same<br>4=More<br>5=Nothing to drink<br>9=Don't know | —                                        |
| <b>Care seeking</b>                                          |                                                                                                                                                                                                                                                                      |                                                                                                    |                                          |
| 652h                                                         | Did you seek advice or treatment for [name]'s illness from any source?                                                                                                                                                                                               | 1= Yes<br>2= No<br>9=Don't know                                                                    | <b>SKIP TO 660</b><br><b>SKIP TO 664</b> |
| 653h                                                         | Why did you Not seek advice or treatment from any source? <b>Health facility too far</b>                                                                                                                                                                             | 1= Yes<br>2= No                                                                                    | <b>SKIP TO 718</b>                       |
| 654h                                                         | Why did you Not seek advice or treatment from any source? <b>Had no time</b>                                                                                                                                                                                         | 1= Yes<br>2= No                                                                                    | <b>SKIP TO 718</b>                       |
| 655h                                                         | Why did you Not seek advice or treatment from any source? <b>Had no money</b>                                                                                                                                                                                        | 1= Yes<br>2= No                                                                                    | <b>SKIP TO 718</b>                       |
| 656h                                                         | Why did you Not seek advice or treatment from any source? <b>Did Not want to attend a health facility</b>                                                                                                                                                            | 1= Yes<br>2= No                                                                                    | <b>SKIP TO 718</b>                       |
| 657h                                                         | Why did you Not seek advice or treatment from any source? <b>Could manage at home</b>                                                                                                                                                                                | 1= Yes<br>2= No                                                                                    | <b>SKIP TO 718</b>                       |
| 658h                                                         | Why did you Not seek advice or treatment from any source? <b>Spouse did Not allow</b>                                                                                                                                                                                | 1= Yes<br>2= No                                                                                    | <b>SKIP TO 718</b>                       |
| 659h                                                         | Why did you Not seek advice or treatment from any source? <b>Other</b>                                                                                                                                                                                               | 1= Yes<br>2= No                                                                                    | <b>SKIP TO 718</b>                       |
| 660h                                                         | Where did you seek advice or treatment? Anywhere else? <b>Health Post</b>                                                                                                                                                                                            | 1= Yes<br>2= No                                                                                    | —                                        |
| 661h                                                         | Where did you seek advice or treatment? Anywhere else? <b>Health Centre</b>                                                                                                                                                                                          | 1= Yes<br>2= No                                                                                    | —                                        |

|      |                                                                                                       |                                                                                                     |       |
|------|-------------------------------------------------------------------------------------------------------|-----------------------------------------------------------------------------------------------------|-------|
| 662h | Where did you seek advice or treatment? Anywhere else? <b>Hospital</b>                                | 1= Yes<br>2= No                                                                                     | —     |
| 663h | Where did you seek advice or treatment? Anywhere else? <b>Other</b>                                   | Specify                                                                                             | _____ |
| 664h | <b>Interviewer:</b> Check was treatment sought at two or more places?                                 | 1=Yes<br>2=No <b>SKIP TO 665</b>                                                                    | —     |
| 665h | Where did you first seek treatment?                                                                   | 1=Health Post<br>2=Health Centre<br>3=Hospital<br>8=Other                                           | —     |
| 666h | How many days after the illness began did you first seek treatment for [name]?                        | <i>If same day record 00. If don't know record 99.</i>                                              | _____ |
| 667h | Did the health worker ask you to bring [name] back to be seen again?                                  | 1=Yes<br>2=No<br>9=Don't know <b>SKIP TO 670</b>                                                    | —     |
| 668h | When did he/she say that [name] should be brought back?                                               | 1=Before today's date<br>2=After today's date <b>SKIP TO 670</b><br>9=Don't know <b>SKIP TO 670</b> | —     |
| 669h | Did you take [name] back?                                                                             | 1=Yes<br>2=No<br>9=Don't know                                                                       | —     |
| 670h | Has [name] been hospitalized for this illness?                                                        | 1=Yes<br>2=No <b>SKIP TO 672</b><br>9=Don't know <b>SKIP TO 672</b>                                 | —     |
| 671h | How many nights has [name] been hospitalized during this illness?                                     | <i>Record number of nights. If don't know record 99.</i>                                            | _____ |
| 672h | Has [name] been hospitalized at any time in the last 3 months?                                        | 1=Yes<br>2=No<br>9=Don't know                                                                       | —     |
| 673h | How many nights has [name] been hospitalized in the last three months?                                | <i>Record number of nights. If don't know record 99.</i>                                            | _____ |
| 674h | At any time during this illness, did [name] have blood taken from his/her finger or heel for testing? | 1=Yes<br>2=No <b>SKIP TO 678</b><br>9=Don't know <b>SKIP TO 678</b>                                 | —     |
| 675h | Which test was done?                                                                                  | 1=Microscopy<br>2=RDT<br>9=Don't know                                                               | —     |
| 676h | Where was the test done?                                                                              | 1=Health Post<br>2=Health Centre<br>3=Hospital<br>8=Other                                           | —     |
| 677h | Was the test positive for malaria?                                                                    | 1=Yes<br>2=No<br>9=Don't know                                                                       | —     |
| 678h | In addition, did you seek advice from any of the following? <b>Traditional birth attendants</b>       | 1=Yes<br>2=No                                                                                       | —     |
| 679h | In addition, did you seek advice from any of the following? <b>Religious leader</b>                   | 1=Yes<br>2=No                                                                                       | —     |
| 680h | In addition, did you seek advice from any of the following? <b>Pharmacy</b>                           | 1=Yes<br>2=No                                                                                       | —     |
| 681h | In addition, did you seek advice from any of                                                          | 1=Yes<br>2=No                                                                                       | —     |

|      |                                                                                       |                |       |
|------|---------------------------------------------------------------------------------------|----------------|-------|
|      | the following? <b>Traditional drug seller</b>                                         |                |       |
| 682h | In addition, did you seek advice from any of the following? <b>Relative or friend</b> | 1=Yes<br>2=No  | —     |
| 683h | In addition, did you seek advice from any of the following? <b>Other</b>              | <b>Specify</b> | _____ |

| <b>Drugs</b> |                                                                                                                                                 |                                                                                                                             |                                               |
|--------------|-------------------------------------------------------------------------------------------------------------------------------------------------|-----------------------------------------------------------------------------------------------------------------------------|-----------------------------------------------|
| 684h         | At any time during the illness, was [name] prescribed any drugs for the illness?                                                                | 1=Yes<br>2=No<br>9=Don't know                                                                                               | <b>SKIP TO 718</b><br><b>SKIP TO 718</b><br>— |
| 685h_a       | What drugs did [name] take? <b>Antimalarial tablet (Co-artem, Chloroquine, etc)</b>                                                             | 1= Yes<br>2 = No                                                                                                            | —                                             |
| 685h_b       | How long after the illness started did [name] first take <b>Antimalarial tablet</b> ?                                                           | Write number of days. If child did Not take drug write 0 If 7 days or more write 7.<br>If don't know write 9                | —                                             |
| 685h_c       | <b>Did [name] complete taking the Antimalarial tablet?</b>                                                                                      | 1= Yes<br>2 = No                                                                                                            | —                                             |
| 685h_d       | <b>Did you have [Antimalarial tablet] at home or did you get it from somewhere else.</b><br><br><i>If somewhere else, probe for the source.</i> | 1=Home<br>2=Public health facility<br>3=Private health facility<br>4=HEW<br>5=Shop<br>8=Other Specify _____<br>9=Don't know | —                                             |
| 694h_a       | What drugs did [name] take?<br><b>Amoxicillin</b>                                                                                               | 1= Yes<br>2 = No                                                                                                            | —                                             |
| 694h_b       | How long after the illness started did [name] first take <b>Amoxicillin</b> ?                                                                   | Write number of days. If child did Not take drug write 0. If 7 days or more write 7.<br>If don't know write 9               | —                                             |
| 694h_c       | <b>Did [name] complete taking the Amoxicillin?</b>                                                                                              | 1= Yes<br>2 = No                                                                                                            | —                                             |
| 694h_d       | <b>Did you have Amoxicillin at home or did you get it from somewhere else.</b><br><br><i>If somewhere else, probe for the source.</i>           | 1=Home<br>2=Public health facility<br>3=Private health facility<br>4=HEW<br>5=Shop<br>8=Other Specify _____<br>9=Don't know | —                                             |
| 695h_a       | What drugs did [name] take?<br><b>Erythromycin</b>                                                                                              | 1= Yes<br>2 = No                                                                                                            | —                                             |
| 695h_b       | How long after the illness started did [name] first take <b>Erythromycin</b> ?                                                                  | Write number of days. If child did Not take drug write 0. If 7 days or more write 7. If don't know write 9                  | —                                             |
| 695h_c       | <b>Did [name] complete taking the Erythromycin?</b>                                                                                             | 1= Yes<br>2 = No                                                                                                            | —                                             |
| 695h_d       | <b>Did you have Erythromycin at home or did you get it from somewhere else?</b><br><br><i>If somewhere else, probe for the source.</i>          | 1=Home<br>2=Public health facility<br>3=Private health facility<br>4=HEW<br>5=Shop<br>8=Other Specify _____                 | —                                             |

|        |                                                                                                                                                            |                                                                                                                             |   |
|--------|------------------------------------------------------------------------------------------------------------------------------------------------------------|-----------------------------------------------------------------------------------------------------------------------------|---|
|        |                                                                                                                                                            | 9=Don't know                                                                                                                |   |
| 696h_a | What drugs did [name] take?<br><b>Azithromycin</b>                                                                                                         | 1= Yes<br>2 = No                                                                                                            | — |
| 696h_b | How long after the illness started did [name] first take <b>Azithromycin</b> ?                                                                             | Write number of days. If child did Not take drug write 0. If 7 days or more write 7.<br>If don't know write 9               | — |
| 696h_c | Did [name] complete taking the <b>Azithromycin</b> ?                                                                                                       | 1= Yes<br>2 = No                                                                                                            | — |
| 696h_d | Did you have <b>Azithromycin</b> at home or did you get it from somewhere else.<br><br><i>If somewhere else, probe for the source.</i>                     | 1=Home<br>2=Public health facility<br>3=Private health facility<br>4=HEW<br>5=Shop<br>8=Other Specify _____<br>9=Don't know | — |
| 697h_a | What drugs did [name] take?<br><b>Cotrimoxazole</b>                                                                                                        | 1= Yes<br>2 = No                                                                                                            | — |
| 697h_b | How long after the illness started did [name] first take <b>Cotrimoxazole</b> ?                                                                            | Write number of days. If child did Not take drug write 0. If 7 days or more write 7.<br>If don't know write 9               | — |
| 697h_c | <b>Did [name] complete taking the Cotrimoxazole?</b>                                                                                                       | 1= Yes<br>2 = No                                                                                                            | — |
| 697h_d | Did you have <b>Cotrimoxazole</b> at home or did you get it from somewhere else.<br><br><i>If somewhere else, probe for the source.</i>                    | 1=Home<br>2=Public health facility<br>3=Private health facility<br>4=HEW<br>5=Shop<br>8=Other Specify _____<br>9=Don't know | — |
| 698h_a | What drugs did [name] take?<br><b>Other antibiotic (pill or syrup)</b>                                                                                     | 1= Yes<br>2 = No                                                                                                            | — |
| 698h_b | How long after the illness started did [name] first take <b>other antibiotic (pill or syrup)</b> ?                                                         | Write number of days. If child did Not take drug write 0. If 7 days or more write 7.<br>If don't know write 9               | — |
| 698h_c | Did [name] complete taking <b>other antibiotic (pill or syrup)</b> ?                                                                                       | 1= Yes<br>2 = No                                                                                                            | — |
| 698h_d | Did you have <b>other antibiotic (pill or syrup)</b> at home or did you get it from somewhere else.<br><br><i>If somewhere else, probe for the source.</i> | 1=Home<br>2=Public health facility<br>3=Private health facility<br>4=HEW<br>5=Shop<br>8=Other Specify _____<br>9=Don't know | — |
| 699h_a | What drugs did [name] take?<br><b>Antibiotic injection</b>                                                                                                 | 1= Yes<br>2 = No                                                                                                            | — |
| 699h_b | How long after the illness started did [name] first take <b>antibiotic injection</b> ?                                                                     | Write number of days. If child did Not take drug write 0. If 7 days or more write 7.<br>If don't know write 9               | — |
| 699h_c | Did [name] complete taking <b>antibiotic injection</b> ?                                                                                                   | 1= Yes<br>2 = No                                                                                                            | — |
| 699h_d | Did you have <b>antibiotic injection</b> at home or did you get it from somewhere else.                                                                    | 1=Home<br>2=Public health facility<br>3=Private health facility                                                             |   |

|        |                                                                                                                            |                                                                                                            |   |
|--------|----------------------------------------------------------------------------------------------------------------------------|------------------------------------------------------------------------------------------------------------|---|
|        | <i>If somewhere else, probe for the source.</i>                                                                            | 4=HEW<br>5=Shop<br>8=Other Specify _____<br>9=Don't know                                                   | — |
| 700h_a | What drugs did [name] take?<br><b>Zinc</b>                                                                                 | 1= Yes<br>2 = No                                                                                           | — |
| 700h_b | How long after the illness started did [name] first take <b>Zinc</b> ?                                                     | Write number of days. If child did Not take drug write 0. If 7 days or more write 7. If don't know write 9 | — |
| 700h_c | Did [name] complete taking the <b>Zinc</b> ?                                                                               | 1= Yes<br>2 = No                                                                                           | — |
| 700h_d | Did you have <b>Zinc</b> at home or did you get it from somewhere else.<br><i>If somewhere else, probe for the source.</i> | Write number of days. If child did Not take drug write 0 If 7 days or more write 7. If don't know write 9  | — |
| 701h_a | What drugs did [name] take?<br><b>Fluid made from special packet called ORS</b>                                            | 1= Yes<br>2 = No                                                                                           | — |
| 701h_b | How long after the illness started did [name] first take <b>fluid made from special packet called ORS</b> ?                | Write number of days. If child did Not take drug write 0. If 7 days or more write 7. If don't know write 9 | — |
| 702h_a | What drugs did [name] take?<br><b>ORS-Zinc combined</b>                                                                    | 1= Yes<br>2 = No                                                                                           | — |
| 702h_b | How long after the illness started did [name] first take <b>ORS-Zinc combined</b> ?                                        | Write number of days. If child did Not take drug write 0. If 7 days or more write 7. If don't know write 9 | — |
| 704h_a | What drugs did [name] take?<br><b>Gov. recommended home mad fluid</b>                                                      | 1= Yes<br>2 = No                                                                                           | — |
| 704h_b | How long after the illness started did [name] first take <b>Gov. recommended home mad fluid</b> ?                          | Write number of days. If child did Not take drug write 0. If 7 days or more write 7. If don't know write 9 | — |
| 705h_a | What drugs did [name] take?<br><b>Pill or Syrup</b>                                                                        | 1= Yes<br>2 = No                                                                                           | — |
| 705h_b | How long after the illness started did [name] first take <b>Pill or Syrup</b> ?                                            | Write number of days. If child did Not take drug write 0. If 7 days or more write 7. If don't know write 9 | — |
| 706h_a | What drugs did [name] take?<br><b>Injection</b>                                                                            | 1= Yes<br>2 = No                                                                                           | — |
| 706h_b | How long after the illness started did [name] first take <b>Injection</b> ?                                                | Write number of days. If child did Not take drug write 0. If 7 days or more write 7. If don't know write 9 | — |
| 707h_a | What drugs did [name] take?<br><b>IV intravenous</b>                                                                       | 1= Yes<br>2 = No                                                                                           | — |
| 707h_b | How long after the illness started did [name] first take <b>IV intravenous</b> ?                                           | Write number of days. If child did Not take drug write 0. If 7 days or more write 7. If don't know write 9 | — |
| 708h_a | What drugs did [name] take?<br><b>Home remedies/herbal medicine</b>                                                        | 1= Yes<br>2 = No                                                                                           | — |
| 708h_b | How long after the illness started did [name] first take <b>home remedies/herbal medicine</b> ?                            | Write number of days. If child did Not take drug write 0. If 7 days or more write 7. If don't know write 9 | — |
| 709h_a | What drugs did [name] take?<br><b>Paracetamol</b>                                                                          | 1= Yes<br>2 = No                                                                                           | — |
| 709h_b | How long after the illness started did [name]                                                                              | Write number of days. If child did Not take drug                                                           | — |

|                          |                                                                              |                                                                                                               |      |
|--------------------------|------------------------------------------------------------------------------|---------------------------------------------------------------------------------------------------------------|------|
|                          | first take <b>Paracetamol</b> ?                                              | write 0. If 7 days or more write 7.<br>If don't know write 9                                                  |      |
| 710h_a                   | What drugs did [name] take?<br><b>Panadol</b>                                | 1= Yes<br>2 = No                                                                                              | —    |
| 710h_b                   | How long after the illness started did [name] first take <b>Panadol</b> ?    | Write number of days. If child did Not take drug write 0. If 7 days or more write 7.<br>If don't know write 9 | —    |
| 711h_a                   | What drugs did [name] take?<br><b>Aspirin</b>                                | 1= Yes<br>2 = No                                                                                              | —    |
| 711h_b                   | How long after the illness started did [name] first take <b>Aspirin</b> ?    | Write number of days. If child did Not take drug write 0. If 7 days or more write 7.<br>If don't know write 9 | —    |
| 712h_a                   | What drugs did [name] take?<br><b>Ibuprofen</b>                              | 1= Yes<br>2 = No                                                                                              | —    |
| 712h_b                   | How long after the illness started did [name] first take <b>Ibuprofen</b> ?  | Write number of days. If child did Not take drug write 0. If 7 days or more write 7.<br>If don't know write 9 | —    |
| 713h_a                   | What <b>other</b> drugs did [name] take?<br><b>Other</b>                     | Specify                                                                                                       | —    |
| 713h_b                   | How long after the illness started did [name] first take <b>other drug</b> ? | Write number of days. If child did Not take drug write 0. If 7 days or more write 7.<br>If don't know write 9 | —    |
| 714h                     | What <b>other</b> drugs did [name] take?<br><b>Don't know</b>                | 1= Yes<br>2 = No                                                                                              | —    |
| <b>Section 3.7: MUAC</b> |                                                                              |                                                                                                               |      |
| 718h                     | Mid-upper arm circumference                                                  | <i>In centimeters</i><br><i>9994=If Not present</i><br><i>9995=Refused</i><br><i>9996=Other</i>               | — .— |



## ANNEX C: INSTRUMENTS FOR HEALTH PROVIDER SURVEY

## Dagu Baseline Facility Questionnaire: Health Post

## MODULE 1: BACKGROUND INFORMATION OF THE HEALTH POST

|     |                                                  |                                            |
|-----|--------------------------------------------------|--------------------------------------------|
| 100 | Date<br>(Gregorian Calendar)                     | _ _ _  /  _ _ _  /  _ _ _ <br>dd / mm / yy |
| 101 | Region Code                                      | _ _ _ _ _ _ _ _ _                          |
| 102 | Zone Code                                        | _ _ _ _ _ _ _ _ _                          |
| 103 | Woreda Name                                      | _ _ _ _ _ _ _ _ _                          |
| 104 | Woreda code                                      | _ _ _ _ _ _ _ _ _                          |
| 105 | PHCU/Health Centre name                          | _ _ _ _ _ _ _ _ _                          |
| 106 | Kebele name                                      | _ _ _ _ _ _ _ _ _                          |
| 107 | Gote name                                        | _ _ _ _ _ _ _ _ _                          |
| 108 | Cluster code                                     | _ _ _                                      |
| 109 | GPS Latitude<br>Take coordinates of health post  | _ _ _  :  _ _ _ _ _ _ _ _ _                |
| 110 | GPS Longitude<br>Take coordinates of health post | _ _ _  :  _ _ _ _ _ _ _ _ _                |
| 111 | Interviewer Initials                             | _ _ _                                      |
| 112 | Did you read the HEW the consent form?           | 1 = Yes<br>2 = No<br> _ _                  |
| 113 | Did the HEW agree to be interviewed?             | 1= Yes – GO TO MODULE 2<br>2 = No<br> _ _  |
| 114 | If not, why not?                                 | _ _ _ _ _ _ _ _ _                          |

## MODULE 2: FACILITY, EQUIPMENT, MEDICINE AND JOB AIDS

INTERVIEWER: *I would now like to ask you questions about the facility, equipment, medicine and job aids at this health post.*

WALK AROUND THE FACILITY WITH THE HEW AND PERSONALLY CHECK THE AVAILABILITY OF EQUIPMENT, AND MEDICINE IN STOCK.

*Does the facility have the following essential support services?*

|     |                                            |                                                                                                                                                                                                                                                                                                                                             |     |
|-----|--------------------------------------------|---------------------------------------------------------------------------------------------------------------------------------------------------------------------------------------------------------------------------------------------------------------------------------------------------------------------------------------------|-----|
| 115 | What is the main source of drinking water? | 1 = Piped connection into health post<br>2 = Piped connection into yard<br>3 = Public standpipes<br>4 = Boreholes<br>5 = Protected dug wells<br>6 = Protected springs<br>7 = Rainwater collection<br>8 = Surface water<br>9 = Open dug wells<br>10 = Unprotected springs<br>11 = Vendor provided water<br>12 = Bottled water<br>13 = Tanker | _ _ |
| 116 | Water supply available on day of survey    | 1 = Yes<br>2 = No                                                                                                                                                                                                                                                                                                                           | _ _ |
| 117 | Electricity connection or other power      | 1 = Yes                                                                                                                                                                                                                                                                                                                                     | _ _ |

|     |                                                                                                                                    |                                                                                                                                                     |                                |    |
|-----|------------------------------------------------------------------------------------------------------------------------------------|-----------------------------------------------------------------------------------------------------------------------------------------------------|--------------------------------|----|
|     | <b>sources (example, gas/solar generator)</b>                                                                                      | <b>2 = No-SKIP 119</b>                                                                                                                              |                                |    |
| 118 | <b>Electricity supply on day of survey?</b>                                                                                        | 1 = Yes<br>2 = No                                                                                                                                   | __                             |    |
| 119 | <b>Functional sterilizer that works on the day of the survey?</b>                                                                  | 1 = Yes<br>2 = No                                                                                                                                   | __                             |    |
| 120 | <b>Functional fridge that works on the day of the survey?</b>                                                                      | 1 = Yes<br>2 = No                                                                                                                                   | __                             |    |
| 121 | <b>Toilets accessible to facility users?</b>                                                                                       | 1 = Yes<br>2 = No                                                                                                                                   | __                             |    |
| 122 | <b>Generally is there a cell phone signal at this health post?</b>                                                                 | 1 = Yes<br>2 = No                                                                                                                                   | __                             |    |
| 123 | <b>Is it all functional today?</b><br><i>INTERVIEWER -check your phone if there is signal on day of survey</i>                     | 1 = Yes<br>2 = No                                                                                                                                   | __                             |    |
|     | <b>Which means of communication do you have to speak to the health facility?</b><br><br><b>Check all that apply</b>                | For each:1 = Yes 2 = No                                                                                                                             |                                |    |
|     |                                                                                                                                    | 124                                                                                                                                                 | Facility landline/mobile phone | __ |
|     |                                                                                                                                    | 125                                                                                                                                                 | Staff member mobile phone      | __ |
|     |                                                                                                                                    | 126                                                                                                                                                 | Phone outside the facility     | __ |
|     |                                                                                                                                    | 127                                                                                                                                                 | In person communication        | __ |
| 128 | <b>During the last sick newborn referral from the health post to health center, did you speak to the health facility directly?</b> | 1 = Yes<br>2 = No – GO TO 130<br>3 =Don't know - GO TO 130                                                                                          | __                             |    |
| 129 | <b>IF YES, Which means of communication did you use?</b>                                                                           | 1 = Facility landline/mobile phone<br>2 = Staff member mobile phone;<br>3 = Phone outside the facility<br>4 = Radio<br>5 = In person communication; | __                             |    |
| 130 | <b>When referring from this health post to the health center for further care, do you use referral forms?</b>                      | 1 = Yes (NOTE: check to see if an official referral form)<br>2 = No                                                                                 | __                             |    |
| 131 | <b>Do you receive any back referral forms on cases you have referred?</b>                                                          | 1 = Yes<br>2 = No                                                                                                                                   | __                             |    |

| <b>Walk around the facility with the respondent and personally check the availability of medicine</b> |                                                                                           |    |      |                                                                                                                        |          |
|-------------------------------------------------------------------------------------------------------|-------------------------------------------------------------------------------------------|----|------|------------------------------------------------------------------------------------------------------------------------|----------|
|                                                                                                       | <b>Does the facility have the following medicines today?</b>                              |    |      | <b>If not available or expired, what was the duration of stock out /expiry for?</b>                                    |          |
|                                                                                                       | <i>For each:<br/>1 = Yes<br/>2 = Not available<br/>3= Expired<br/>4 = Never available</i> |    |      | <i>Check for the last three months and what was the longest number of consecutive days without that item (in days)</i> |          |
| 132                                                                                                   | Vitamin k 1 mg                                                                            | __ | 133  | Vitamin k 1 mg                                                                                                         | __ __ __ |
| 132A                                                                                                  | Vitamin k 10 mg                                                                           | __ | 132B | Vitamin k 10 mg                                                                                                        | __ __ __ |
| 134                                                                                                   | Vitamin A 200,000 IU                                                                      | __ | 135  | Vitamin A 200,000 IU                                                                                                   | __ __ __ |
| 136                                                                                                   | Vitamin A 100,000 IU                                                                      | __ | 137  | Vitamin A 100,000 IU                                                                                                   | __ __ __ |
| 138                                                                                                   | TTC eye ointment                                                                          | __ | 139  | TTC eye ointment                                                                                                       | __ __ __ |
| 140                                                                                                   | Chlorohexidine                                                                            | __ | 141  | Chlorohexidine                                                                                                         | __ __ __ |

|     |                                      |    |     |                                      |       |
|-----|--------------------------------------|----|-----|--------------------------------------|-------|
| 142 | Gentamycin 20 mg/2ml, box of 50 amp  | __ | 143 | Gentamycin 20 mg/2ml, box of 50 amp  | __ __ |
| 144 | Gentamycin 80mg/2ml                  |    | 145 | Gentamycin 80mg/2ml                  | __ __ |
| 146 | Amoxicillin suspension (125 mg/5 ml) | __ | 147 | Amoxicillin suspension (125 mg/5 ml) | __ __ |
| 148 | Amoxicillin tab 250 (dispersible)    | __ | 149 | Amoxicillin tab 250 (dispersible)    | __ __ |
| 150 | Amoxicillin tab 125 mg (dispersible) | __ | 151 | Amoxicillin tab 125 mg (dispersible) | __ __ |
| 152 | Ampicillin powder for inj, 500 mg    | __ | 153 | Ampicillin powder for inj, 500 mg    | __ __ |
| 154 | Paracetamol                          | __ | 155 | Paracetamol                          | __ __ |
| 156 | Iron                                 | __ | 157 | Iron                                 | __ __ |
| 158 | Folate                               | __ | 159 | Folate                               | __ __ |
| 160 | BCG                                  | __ | 161 | BCG                                  | __ __ |
| 162 | Polio vaccine                        | __ | 163 | Polio vaccine                        | __ __ |
| 164 | ORS                                  | __ | 165 | ORS                                  | __ __ |
| 166 | Zinc                                 | __ | 167 | Zinc                                 | __ __ |
| 168 | Zinc-ORS combined                    | __ | 169 | Zinc-ORS combined                    | __ __ |
| 170 | Malaria RDT                          | __ | 171 | Malaria RDT                          | __ __ |
| 172 | Coartem (Artemether/lumefantrine)    | __ | 173 | Coartem (Artemether/lumefantrine)    | __ __ |
| 174 | Chloroquine syrup                    | __ | 175 | Chloroquine syrup                    | __ __ |
| 176 | Artesunate suppository               | __ | 177 | Artesunate suppository               | __ __ |
| 178 | HIV diagnostic tests                 | __ | 179 | HIV diagnostic tests                 | __ __ |
| 180 | Cotrimoazole                         | __ | 181 | Cotrimoazole                         | __ __ |
| 182 | Plumpy nut                           | __ | 183 | Plumpy nut                           | __ __ |
| 184 | BP100                                | __ | 185 | BP100                                | __ __ |

|  | Does the facility have the following functional equipment today? | For each 1=yes, 2=no                     |    |
|--|------------------------------------------------------------------|------------------------------------------|----|
|  |                                                                  |                                          | __ |
|  | 186                                                              | Ambu bag / face mask (full size 0 and 1) | __ |
|  | 187                                                              | Any Thermometer                          | __ |
|  | 188                                                              | Infant scale                             | __ |
|  | 189                                                              | Weighing sling                           | __ |
|  | 190                                                              | Blood pressure cuff                      | __ |
|  | 191                                                              | Stethoscope                              | __ |
|  | 192                                                              | Watch or clock                           | __ |
|  | 193                                                              | Tape measure                             | __ |
|  | 194                                                              | Examination couch                        | __ |
|  | 195                                                              | Drape                                    | __ |
|  | 196                                                              | Washable mackintosh                      | __ |
|  | 197                                                              | Dustbin                                  | __ |

|  |                                                                       |                            |                                              |    |
|--|-----------------------------------------------------------------------|----------------------------|----------------------------------------------|----|
|  |                                                                       | 198                        | Cups/drinking water                          | __ |
|  |                                                                       | 199                        | Sharps container                             | __ |
|  |                                                                       | 200                        | Chlorine bleach                              | __ |
|  |                                                                       | 201                        | Bucket for decontamination solution          | __ |
|  |                                                                       | 202                        | Contaminated waste container                 | __ |
|  |                                                                       | 203                        | Soap and towel or handrub                    | __ |
|  |                                                                       | 204                        | Alcohol-based hand rub                       | __ |
|  |                                                                       | 205                        | Clean glove                                  | __ |
|  |                                                                       | 206                        | Syringe with needle for Gentamycin injection | __ |
|  |                                                                       | 207                        | MUAC tape measure                            | __ |
|  | <b>Does the facility have the following job aids and forms today?</b> |                            | <i>For each 1=yes, 2=no</i>                  |    |
|  |                                                                       | 208                        | Pregnant woman registration book             | __ |
|  |                                                                       | 209                        | ANC Register                                 | __ |
|  |                                                                       | 210                        | Delivery Register                            | __ |
|  |                                                                       | 211                        | PNC Register                                 | __ |
|  |                                                                       | 212                        | ICCM registration book for 0- under 2 months | __ |
|  |                                                                       | 213                        | ICCM registration book 2 -59 months          | __ |
|  |                                                                       | 214                        | Family health cards                          | __ |
|  |                                                                       | 215                        | Vaccination cards                            | __ |
|  |                                                                       | 216                        | Family folder                                | __ |
|  |                                                                       | 217                        | Stock card/bin card                          | __ |
|  |                                                                       | 218                        | HMIS forms (monthly and quarterly reporting) | __ |
|  | 219                                                                   | Request and re-supply form | __                                           |    |
|  | 220                                                                   | Chart booklet              | __                                           |    |

### MODULE 3: HEALTH POST REGISTER REVIEW BY THE DATA COLLECTOR

PLEASE LOOK AT THE SPECIFIED HEW REGISTERS DETAILED BELOW FOR THE DIFFERENT DATA ELEMENTS. WRITE 9999, 999 OR 99 IF NOT AVAILABLE.

*I would now like to take a look at your registers to abstract information about the community in this kebele and the services provided them. I will ask about the population profile for the last 12 months and services provided by you for the last three months from \_\_\_\_\_ to \_\_\_\_\_.*

|     |                                                                                                                     |         |
|-----|---------------------------------------------------------------------------------------------------------------------|---------|
|     | <b>Obtain data on population FOR THE YEAR from the day of survey from Health Post wall records</b>                  |         |
| 221 | Number of people in the kebele                                                                                      | _ _ _ _ |
| 222 | Number of households in the kebele                                                                                  | _ _ _ _ |
| 223 | Total number of women of reproductive age                                                                           | _ _ _ _ |
| 224 | Total number of under 5 children in the kebele                                                                      | _ _ _ _ |
|     | <b>Obtain data on expected number of pregnancies and births from the PAST QUARTER from Health Post wall records</b> |         |
| 225 | Expected number pregnancies                                                                                         | _ _ _ _ |
| 226 | Expected number of births                                                                                           | _ _ _ _ |

|     |                                                                                                                                                                                               |       |
|-----|-----------------------------------------------------------------------------------------------------------------------------------------------------------------------------------------------|-------|
| 227 | Expected number of facility births                                                                                                                                                            | _ _ _ |
|     | <b>Obtain data from ANC registers for the PAST QUARTER</b>                                                                                                                                    |       |
| 228 | Number of women receiving 1 visit                                                                                                                                                             | _ _   |
| 229 | Number of women receiving 2 visits                                                                                                                                                            | _ _   |
| 230 | Number of women receiving 3 visits                                                                                                                                                            | _ _   |
| 231 | Number of women receiving 4 visits                                                                                                                                                            | _ _   |
|     | <b>Obtain data from delivery registers for the PAST QUARTER</b>                                                                                                                               |       |
| 232 | Number of births attended by the HEW                                                                                                                                                          | _ _   |
| 233 | Number of total births (home, health post, health center, hospital)                                                                                                                           | _ _ _ |
| 234 | Number of live births                                                                                                                                                                         | _ _   |
| 235 | Number of newborn deaths (28 days or less)                                                                                                                                                    | _ _   |
|     | <b>PNC data</b>                                                                                                                                                                               |       |
| 236 | Is there a Post Natal Care register (standard or otherwise) in this health post<br>1= Yes, 2=No                                                                                               | _     |
|     | <b>If Post Natal Care register is not available but family folder is available, obtain the information from the family folder given for the PAST QUARTER. Ask the HEWs to separate those.</b> |       |
| 237 | Number receiving 1 visit                                                                                                                                                                      | _ _   |
| 238 | Number receiving 2 visits                                                                                                                                                                     | _ _   |
| 239 | Number receiving 3 visits                                                                                                                                                                     | _ _   |
|     | <b>If information is not available from register books on the following, enquire from the HEW where to obtain the following information for the PAST QUARTER</b>                              |       |
| 240 | Number of newborns treated for asphyxia, initial stimulation, or resuscitation by the HEW                                                                                                     | _ _   |
| 241 | Number of newborns given chlorohexidine cord care by the HEW                                                                                                                                  | _ _   |
|     | <b>Obtain data from the ICCM 2-59 month register for the PAST QUARTER</b>                                                                                                                     |       |
| 242 | Number of initial consultations with children                                                                                                                                                 | _ _ _ |
| 243 | Number of sick children who were referred                                                                                                                                                     | _ _ _ |
| 244 | Number of children classified as having pneumonia                                                                                                                                             | _ _ _ |
| 245 | Number of children classified as having diarrhea                                                                                                                                              | _ _ _ |
| 246 | Number of children classified as having malaria                                                                                                                                               | _ _ _ |
| 247 | Number of children who received antibiotic for pneumonia                                                                                                                                      | _ _ _ |
| 248 | Number of children who received ORS for diarrhea                                                                                                                                              | _ _ _ |
| 249 | Number of children who received zinc for diarrhea                                                                                                                                             | _ _ _ |
| 250 | Number of children who received zinc-ORS combined for diarrhea                                                                                                                                | _ _ _ |
| 251 | Number of children who received RDT for malaria                                                                                                                                               | _ _ _ |
| 252 | Number of children who received ACT for malaria                                                                                                                                               | _ _ _ |

**Obtain data from iCCM 0-2 month registration book for information below for the PAST QUARTER**  
**For each of the newborn less than 2 months old seen at the health center (recorded above) complete a separate record review.**

**Record 1**

|      |                                                                                                           |                                                                                           |                                                                   |   |
|------|-----------------------------------------------------------------------------------------------------------|-------------------------------------------------------------------------------------------|-------------------------------------------------------------------|---|
| 253A | How many 0-2 months were seen in the last quarter?                                                        |                                                                                           | _ _ _                                                             |   |
| 253  | <b>Name of child</b>                                                                                      | _____ First name                                                                          |                                                                   |   |
|      |                                                                                                           | _____ Last name                                                                           |                                                                   |   |
| 254  | <b>Address of child</b>                                                                                   | _____ Gote name                                                                           |                                                                   |   |
|      |                                                                                                           | _____ Keble name                                                                          |                                                                   |   |
| 255  | <b>Date Seen</b>                                                                                          | <i>Gregorian calendar (DD/MM/YY)</i>                                                      | _ _ / _ _ / _ _                                                   |   |
| 256  | <b>Age of baby at the time of consultation in weeks</b>                                                   | <i>Record age of baby in weeks ranging from 1-8 weeks. If unknown 9</i>                   | _  weeks                                                          |   |
| 257  | <b>Gender of baby</b>                                                                                     | 1 = Male<br>2 = Female                                                                    | _                                                                 |   |
| 258  | <b>Weight on the day of consultation in grams</b>                                                         | <i>If weight is given in KGs record in grams e.g 3.5 KG = 3500 grams. If unknown 9999</i> | _ _ _ _  grams                                                    |   |
| 259  | <b>Birth Weight (Written for those less than 7 days)</b>                                                  | 1= < 1,500 grams<br>2= 1,500 - < 2,500 grams<br>3= >= 2,500 grams<br>9= Unknown           | _                                                                 |   |
| 260  | <b>Gestational Age (in weeks)</b>                                                                         | 1= < 32 weeks<br>2= 32 – 36 weeks<br>3= >= 37 weeks<br>9= Unknown                         | _                                                                 |   |
| 261  | <b>Temperature on the day of consultation in degree Celsius</b>                                           | <i>Record temperature to one decimal place (e.g. 34.3 °C) If unknown 99.9</i>             | _ _ _ . _  °C                                                     |   |
| 262  | <b>Respiratory Rate per minute on the day of consultation</b>                                             | <i>If unknown 999</i>                                                                     | _ _ _                                                             |   |
|      | <b>Signs and symptoms of the newborn at the time of consultation?</b><br><br><b>Record all that apply</b> | For each: 1 = Yes 2 = No                                                                  |                                                                   |   |
|      |                                                                                                           | 263                                                                                       | Reduced feeding/unable to feed                                    | _ |
|      |                                                                                                           | 264                                                                                       | Convulsion                                                        | _ |
|      |                                                                                                           | 265                                                                                       | Severe Chest in-drawing                                           | _ |
|      |                                                                                                           | 266                                                                                       | Vomiting                                                          | _ |
|      |                                                                                                           | 267                                                                                       | Fever                                                             | _ |
|      |                                                                                                           | 268                                                                                       | Diarrhea                                                          | _ |
|      |                                                                                                           | 269                                                                                       | Fast breathing                                                    | _ |
|      |                                                                                                           | 270                                                                                       | Coughing                                                          | _ |
|      |                                                                                                           | 271                                                                                       | Grunting                                                          | _ |
|      |                                                                                                           | 272                                                                                       | Skin pustules                                                     | _ |
|      |                                                                                                           | 273                                                                                       | Yellow palms and soles                                            | _ |
|      |                                                                                                           | 274                                                                                       | Yellow eyes and skin                                              | _ |
|      |                                                                                                           | 275                                                                                       | Red umbilicus or draining pus                                     | _ |
|      |                                                                                                           | 276                                                                                       | Movement only when stimulated or no movement even when stimulated | _ |
|      | 277                                                                                                       | Movement only when stimulated or no movement even when stimulated                         | _                                                                 |   |

|    |                                                                              |                              |                                                               |    |
|----|------------------------------------------------------------------------------|------------------------------|---------------------------------------------------------------|----|
| 1  |                                                                              | 278                          | Bulging fontanelle                                            | __ |
| 2  |                                                                              | 279                          | Restless/Irritable                                            | __ |
| 3  |                                                                              | 280                          | Sunken eyes                                                   | __ |
| 4  |                                                                              | 281                          | Skin pinch goes back slowly                                   | __ |
| 5  |                                                                              | 282                          | Skin pinch goes back very slowly                              | __ |
| 6  |                                                                              | 283                          | Diarrhea lasting 14 days or more                              | __ |
| 7  |                                                                              | 284                          | Blood in the stool                                            | __ |
| 8  |                                                                              | 285                          | Not suckling well                                             | __ |
| 9  |                                                                              | 286                          | Less than 8 breast feeds in 24 hours                          | __ |
| 10 |                                                                              | 287                          | Switching to another breast before one is emptied             | __ |
| 11 |                                                                              | 288                          | Not breast feeding more frequently and longer during sickness | __ |
| 12 |                                                                              | 289                          | Poor positioning during breast feeding                        | __ |
| 13 |                                                                              | 290                          | Not well attached during breast feeding                       | __ |
| 14 |                                                                              | 291                          | Receives other foods or drinks (even water)                   | __ |
| 15 |                                                                              | 292                          | Low weight for age                                            | __ |
| 16 |                                                                              | 293                          | Thrush (ulcers or white patches in mouth)                     | __ |
| 17 |                                                                              | 294                          | Signs and symptoms not given                                  | __ |
| 18 |                                                                              | 295                          | Other – GO TO 297                                             | __ |
| 19 |                                                                              | 296                          | Specify _____                                                 |    |
| 20 |                                                                              |                              |                                                               |    |
| 21 |                                                                              |                              |                                                               |    |
| 22 |                                                                              |                              |                                                               |    |
| 23 |                                                                              |                              |                                                               |    |
| 24 |                                                                              |                              |                                                               |    |
| 25 |                                                                              |                              |                                                               |    |
| 26 | <b>Disease classification of the newborn</b><br><b>Record all that apply</b> |                              | For each:1 = Yes 2 = No                                       |    |
| 27 |                                                                              | 297                          | Very Preterm and/or very low birth weight                     | __ |
| 28 |                                                                              | 298                          | Preterm and/or low birth weight                               | __ |
| 29 |                                                                              | 299                          | VSD                                                           | __ |
| 30 |                                                                              | 300                          | Local bacterial infection                                     | __ |
| 31 |                                                                              | 301                          | Severe Dehydration                                            | __ |
| 32 |                                                                              | 302                          | Some Dehydration                                              | __ |
| 33 |                                                                              | 303                          | No Dehydration                                                | __ |
| 34 |                                                                              | 304                          | Severe Persistent Diarrhea                                    | __ |
| 35 |                                                                              | 305                          | Dysentery                                                     | __ |
| 36 |                                                                              | 306                          | Jaundice                                                      | __ |
| 37 |                                                                              | 307                          | Severe Jaundice                                               | __ |
| 38 |                                                                              | 308                          | Malaria                                                       | __ |
| 39 |                                                                              | 309                          | Feeding problem or low weight                                 | __ |
| 40 | 310                                                                          | Classification not given     | __                                                            |    |
| 41 | 311                                                                          | Other Go to 313              | __                                                            |    |
| 42 | 312                                                                          | Specify _____                |                                                               |    |
| 43 |                                                                              |                              |                                                               |    |
| 44 | <b>Treatment given to the newborn</b><br><b>Record all that apply</b>        |                              | For each:1 = Yes 2 = No                                       |    |
| 45 |                                                                              | 313                          | Gentamycin IM first dose                                      | __ |
| 46 |                                                                              | 314                          | Gentamycin IM for seven days                                  | __ |
| 47 |                                                                              | 315                          | Amoxicillin suspension/dispersible first dose                 | __ |
| 48 |                                                                              | 316                          | Amoxicillin suspension/dispersible for 7 days                 | __ |
| 49 |                                                                              | 317                          | Amoxicillin suspension/dispersible for 5 days                 | __ |
| 50 |                                                                              | 318                          | ORS (Plan B) – Facility treatment                             | __ |
| 51 |                                                                              | 319                          | ORS (Plan A) – Home treatment                                 | __ |
| 52 |                                                                              | 320                          | Zinc for 10 days                                              | __ |
| 53 |                                                                              | 321                          | Zinc-ORS combined                                             | __ |
| 54 |                                                                              | 322                          | Oral chloroquine (Anti-malarial)                              | __ |
| 55 |                                                                              | 323                          | Oral quinine (Anti-malarial)                                  | __ |
| 56 |                                                                              | 324                          | Oral coartem (Anti-malarial)                                  | __ |
| 57 |                                                                              | 325                          | Rectal Artesunate (Anti-malarial)                             | __ |
| 58 | 326                                                                          | IV Quinine (Anti-malarial)   | __                                                            |    |
| 59 | 327                                                                          | Other Antimalarial (specify) | __                                                            |    |
| 60 |                                                                              |                              |                                                               |    |

|     |                                                                                              |     |                                              |    |
|-----|----------------------------------------------------------------------------------------------|-----|----------------------------------------------|----|
|     |                                                                                              | 328 | TTC (Tetracycline) eye ointment              | __ |
|     |                                                                                              | 329 | GV paint (Gentian Violet)                    | __ |
|     |                                                                                              | 330 | Nutritional Counseling                       | __ |
|     |                                                                                              | 331 | Exposing to sunshine 20– 30 minutes everyday | __ |
|     |                                                                                              | 332 | Other treatment GO TO 334                    | __ |
|     |                                                                                              | 333 | Specify _____                                |    |
| 334 | <b>Was newborn referred to a higher facility?</b>                                            |     | 1 = Yes – GO TO 337<br>2 = No                | __ |
| 335 | <b>If newborn had VSD and was treated at health post was gentamycin treatment completed?</b> |     | 1 = Yes<br>2 = No<br>3 = Not VSD case        | __ |
|     | <b>Outcome of the newborn treatment</b>                                                      |     | For each: 1 = Yes 2 = No                     |    |
|     |                                                                                              | 336 | Health improved/healed                       | __ |
|     |                                                                                              | 337 | Died                                         | __ |
|     |                                                                                              | 338 | Worsened                                     | __ |
|     |                                                                                              | 339 | Same                                         | __ |
|     |                                                                                              | 340 | Unknown                                      | __ |



Obtain data from iCCM 2-59 registration book for information below for the PAST QUARTER  
For the past 10 children seen at the health post (recorded above) complete a separate record review.

**Record 1**

|      |                                                                                           |                                                                                          |                 |
|------|-------------------------------------------------------------------------------------------|------------------------------------------------------------------------------------------|-----------------|
| 341A | How many 2-59 months were seen in the last quarter?                                       |                                                                                          | _ _ _           |
| 341  | Name of child                                                                             | _____ First name<br>_____ Last name                                                      |                 |
| 342  | Address of child                                                                          | _____ Gote name<br>_____ Keble name                                                      |                 |
| 343  | Date Seen                                                                                 | Gregorian calendar (DD/MM/YY)                                                            | _ _ / _ _ / _ _ |
| 344  | Age of child at the time of consultation                                                  | Record age of child in months.<br>If unknown 99                                          | _ _  months     |
| 345  | Gender                                                                                    | 1 = Male<br>2 = Female                                                                   | _               |
| 346  | Weight on the day of consultation in grams                                                | If weight is given in KGs record in grams<br>e.g 3.5 KG = 3500 grams.<br>If unknown 9999 | _ _ _ _  grams  |
| 347  | Temperature on the day of consultation in degree Celsius                                  | Record temperature to one decimal place (e.g. 34.3 °C)<br>If unknown 99.9                | _ _ . _  °C     |
| 348  | Respiratory Rate per minute on the day of consultation                                    | If unknown 999                                                                           | _ _ _           |
|      | Signs and symptoms of the child at the time of consultation?<br><br>Record all that apply | For each: 1 = Yes 2 = No                                                                 |                 |
| 349  |                                                                                           | Reduced feeding/unable to feed                                                           | _               |
| 350  |                                                                                           | Vomiting                                                                                 | _               |
| 351  |                                                                                           | Convulsion                                                                               | _               |
| 352  |                                                                                           | Movement only when stimulated or no movement even when stimulated                        | _               |
| 353  |                                                                                           | Movement only when stimulated or no movement even when stimulated                        | _               |
| 354  |                                                                                           | Restless/Irritable                                                                       | _               |
| 355  |                                                                                           | Difficult breathing                                                                      | _               |
| 356  |                                                                                           | Fast breathing                                                                           | _               |
| 357  |                                                                                           | Coughing                                                                                 | _               |
| 358  |                                                                                           | Severe Chest in-drawing                                                                  | _               |
| 359  |                                                                                           | Stridor                                                                                  | _               |
| 360  |                                                                                           | Diarrhea                                                                                 | _               |
| 361  |                                                                                           | Diarrhea lasting 14 days or more                                                         | _               |
| 362  |                                                                                           | Blood in the stool                                                                       | _               |
| 363  |                                                                                           | Skin pinch goes back slowly                                                              | _               |
| 364  |                                                                                           | Skin pinch goes back very slowly                                                         | _               |
| 365  |                                                                                           | Fever                                                                                    | _               |
| 366  | Bulging fontanelle                                                                        | _                                                                                        |                 |
| 367  | Rash                                                                                      | _                                                                                        |                 |
| 368  | Mouth ulcers                                                                              | _                                                                                        |                 |
| 369  | Pus or clouding of cornea                                                                 | _                                                                                        |                 |
| 370  | Perform malaria RDT                                                                       | _                                                                                        |                 |
| 371  | Discharge / pus in the ear                                                                | _                                                                                        |                 |
| 372  | Swelling                                                                                  | _                                                                                        |                 |
| 373  | Visible severe wasting                                                                    | _                                                                                        |                 |

|  |                                                                            |                                                  |                                                                                                                                                             |    |
|--|----------------------------------------------------------------------------|--------------------------------------------------|-------------------------------------------------------------------------------------------------------------------------------------------------------------|----|
|  |                                                                            | 374                                              | Palmar pallor                                                                                                                                               | __ |
|  |                                                                            | 375                                              | Signs and symptoms not given                                                                                                                                | __ |
|  |                                                                            | 376                                              | Other – GO TO 377                                                                                                                                           | __ |
|  |                                                                            | 377                                              | Specify _____                                                                                                                                               |    |
|  | <b>Disease classification of the child</b><br><b>Record all that apply</b> |                                                  | For each:1 = Yes 2 = No                                                                                                                                     |    |
|  |                                                                            | 378                                              | One or more danger signs (unable to drink or breastfeed, vomits everything, convulsions, movement only when stimulated or no movement even when stimulated) | __ |
|  |                                                                            | 379                                              | Severe pneumonia/very severe disease                                                                                                                        | __ |
|  |                                                                            | 380                                              | Pneumonia                                                                                                                                                   | __ |
|  |                                                                            | 381                                              | Severe dehydration                                                                                                                                          | __ |
|  |                                                                            | 382                                              | Some dehydration                                                                                                                                            | __ |
|  |                                                                            | 383                                              | Severe persistent diarrhoea                                                                                                                                 | __ |
|  |                                                                            | 384                                              | Persistent diarrhoea                                                                                                                                        | __ |
|  |                                                                            | 385                                              | Dysentery                                                                                                                                                   | __ |
|  |                                                                            | 386                                              | Very severe febrile disease                                                                                                                                 | __ |
|  |                                                                            | 387                                              | Malaria                                                                                                                                                     | __ |
|  |                                                                            | 388                                              | Fever, malaria unlikely                                                                                                                                     | __ |
|  |                                                                            | 389                                              | Fever, no malaria                                                                                                                                           | __ |
|  |                                                                            | 390                                              | Severe complicated measles                                                                                                                                  | __ |
|  |                                                                            | 391                                              | Measles with eye/mouth complications                                                                                                                        | __ |
|  |                                                                            | 392                                              | Measles                                                                                                                                                     | __ |
|  |                                                                            | 393                                              | Acute ear infection                                                                                                                                         | __ |
|  |                                                                            | 394                                              | Chronic ear infection                                                                                                                                       | __ |
|  |                                                                            | 395                                              | Severe malnutrition                                                                                                                                         | __ |
|  |                                                                            | 396                                              | Moderate malnutrition                                                                                                                                       | __ |
|  |                                                                            | 397                                              | Severe anaemia                                                                                                                                              | __ |
|  |                                                                            | 398                                              | Anaemia                                                                                                                                                     | __ |
|  |                                                                            | 399                                              | Vaccination status not up-to-date                                                                                                                           | __ |
|  |                                                                            | 400                                              | Vaccine(s) needed (specify)                                                                                                                                 | __ |
|  | 401                                                                        | Vitamin A status not up-to-date                  | __                                                                                                                                                          |    |
|  | 402                                                                        | Classification not given                         | __                                                                                                                                                          |    |
|  | 403                                                                        | Other Go to 404                                  | __                                                                                                                                                          |    |
|  | 404                                                                        | Specify _____                                    |                                                                                                                                                             |    |
|  | <b>Treatment given to the child</b><br><b>Record all that apply</b>        |                                                  | For each:1 = Yes 2 = No                                                                                                                                     |    |
|  |                                                                            | 405                                              | ORS (Plan A) – Home treatment                                                                                                                               | __ |
|  |                                                                            | 406                                              | ORS (Plan B) – Facility treatment                                                                                                                           | __ |
|  |                                                                            | 407                                              | Zinc for ten days                                                                                                                                           | __ |
|  |                                                                            | 408                                              | Oral coartem (Anti-malarial)                                                                                                                                | __ |
|  |                                                                            | 409                                              | Oral chloroquine (Anti-malarial)                                                                                                                            | __ |
|  |                                                                            | 410                                              | Oral quinine (Anti-malarial)                                                                                                                                | __ |
|  |                                                                            | 411                                              | Rectal Artesunate (Anti-malarial)                                                                                                                           | __ |
|  |                                                                            | 412                                              | IV Quinine (Anti-malarial)                                                                                                                                  | __ |
|  |                                                                            | 413                                              | Other Antimalarial (specify)                                                                                                                                | __ |
|  |                                                                            | 414                                              | Cotrimoxazole                                                                                                                                               | __ |
|  |                                                                            | 415                                              | Vitamin A                                                                                                                                                   | __ |
|  |                                                                            | 416                                              | Paracetamol                                                                                                                                                 | __ |
|  |                                                                            | 417                                              | Gentamycin IM first dose                                                                                                                                    | __ |
|  |                                                                            | 418                                              | Gentamycin IM for seven days                                                                                                                                | __ |
|  |                                                                            | 419                                              | Amoxicillin suspension/dispersible first dose                                                                                                               | __ |
|  |                                                                            | 420                                              | Amoxicillin suspension/dispersible for seven days                                                                                                           | __ |
|  | 421                                                                        | Amoxicillin suspension/dispersible for five days | __                                                                                                                                                          |    |

|     |                                                     |     |                                 |    |
|-----|-----------------------------------------------------|-----|---------------------------------|----|
|     |                                                     | 422 | TTC (Tetracycline) eye ointment | __ |
|     |                                                     | 423 | Plumpy nut                      | __ |
|     |                                                     | 424 | BP100                           | __ |
|     |                                                     | 425 | Nutritional Counseling          | __ |
|     |                                                     | 426 | Other treatment GO TO 427       | __ |
|     |                                                     | 427 | Specify _____                   |    |
| 428 | <b>Was the child referred to a higher facility?</b> |     | 1 = Yes<br>2 = No               | __ |
|     | <b>Outcome of the child treatment</b>               |     | For each:1 = Yes 2 = No         |    |
|     |                                                     | 429 | Health improved/healed          | __ |
|     |                                                     | 430 | Died                            | __ |
|     |                                                     | 431 | Worsened                        | __ |
|     |                                                     | 432 | Same                            | __ |
|     |                                                     | 433 | Unknown                         | __ |

# OHEP HEW Questionnaire

Unique ID-----

|                  |                                         |                                            |
|------------------|-----------------------------------------|--------------------------------------------|
| 100              | Date (dd/mm/yyyy)<br>Gregorian Calendar | _ _ _  /  _ _ _  /  _ _ _ <br>dd / mm / yy |
| 101              | Region Name                             | _ _ _ _ _ _ _ _ _ _ _ _ _ _ _              |
| 102              | Zone Name                               | _ _ _ _ _ _ _ _ _ _ _ _ _ _ _              |
| 103              | Woreda Name                             | _ _ _ _ _ _ _ _ _ _ _ _ _ _ _              |
| 104              | PHCU/Health Center Name                 | _ _ _ _ _ _ _ _ _ _ _ _ _ _ _              |
| 104A             | Health post code                        | _                                          |
| 104B             | HEW code                                | _                                          |
| 105              | Kebele                                  | _ _ _ _ _ _ _ _ _ _ _ _ _ _ _              |
| 106              | Gote                                    | _ _ _ _ _ _ _ _ _ _ _ _ _ _ _              |
| 107              | Cluster Code                            | _ _ _                                      |
| 108              | GPS Latitude                            | _ _ _  :  _ _ _ _ _ _ _ _ _ _ _            |
| 109              | GPS Longitude                           | _ _ _  :  _ _ _ _ _ _ _ _ _ _ _            |
| <b>ELEVATION</b> | <b>Elevation</b>                        |                                            |
| 110              | Interviewer Initials                    | _ _ _                                      |
| 111              | Did you read the HEW the consent form?  | 1 = Yes<br>2 = No<br> _                    |
| 112              | Did the HEW agree to be interviewed?    | 1= Yes – GO TO MODULE 2<br>2 = No<br> _    |
| 113              | If not, why not?                        | _____ <b>END</b>                           |

## Module: 2

|        |                                                                                  |                                                          |                                    |
|--------|----------------------------------------------------------------------------------|----------------------------------------------------------|------------------------------------|
| 114    | <b>What is your name?</b>                                                        |                                                          |                                    |
| 115 Y  | <b>What is your date of birth?</b>                                               | yyyy  __ __ __ __ <br>Ethiopian Calendar                 |                                    |
| 115 M  | <b>What is your date of birth?</b>                                               | mm  __ __ <br>Ethiopian Calendar                         |                                    |
| 115 D  | <b>What is your date of birth?</b>                                               | dd  __ __ <br>Ethiopian Calendar                         |                                    |
| 116    | <b>What is the number of years you attended school?</b>                          | Write number of years                                    | __   __  Years                     |
| 117    | <b>As an HEW, what is your level?</b>                                            | 1 = Level 1<br>2 = Level 2<br>3 = Level 3<br>4 = Level 4 | __                                 |
| 118    | <b>Do you have any specific qualification in addition to HEW training?</b>       | 1 = Yes<br>2 = No – GO TO 120                            | __                                 |
| 119    | <b>If yes, specify</b>                                                           | _____                                                    |                                    |
| 120 YY | <b>For how long have you worked as an HEW (including work at other kebeles)?</b> | Write number of years.                                   | __   __  Years                     |
| 120MM  | If less than one year, enter number of months only.                              |                                                          | __   __  Months                    |
| 121YY  | <b>For how long have you worked as an HEW in this Health post?</b>               | Write number of years and months.                        | __   __  Years<br> __   __  Months |
| 121MM  | If less than one year, enter 00 years and number of months                       |                                                          |                                    |
| 122    | <b>Do you reside in this kebele?</b>                                             | 1 = Yes<br>2 = No <b>Skip to 124</b>                     | __                                 |
| 123    | <b>Was a home provided to you by the kebele?</b>                                 | 1 = Yes<br>2 = No                                        | __                                 |
| 124    | <b>How many HEWs work in this health post?</b>                                   | Enter number, including the person being interviewed     | __                                 |
| 125    | <b>In this health post who is the HEW in charge (senior HEW)?</b>                | 1 = Myself<br>2 = Other HEW<br>3 = Neither of us         | __                                 |

|                                                                                                                              |                                                                                       |                          |                                      |    |
|------------------------------------------------------------------------------------------------------------------------------|---------------------------------------------------------------------------------------|--------------------------|--------------------------------------|----|
| 126                                                                                                                          | How many days a week is the health post facility functionally open by at least 1 HEW? | Enter number of days     | __                                   |    |
| 127                                                                                                                          | Do you post the health post functional days for clients to see?                       | 1 = Yes<br>2 = No        | __                                   |    |
| 128                                                                                                                          | Do you post the health posts hours of operation for clients to see?                   | 1 = Yes<br>2 = No        | __                                   |    |
| During the weekend and public holidays- where do the residents of the kebele seek medical care?<br><br>Select all that apply |                                                                                       | For each: 1 = Yes 2 = No |                                      |    |
|                                                                                                                              |                                                                                       | 129                      | Health center                        | __ |
|                                                                                                                              |                                                                                       | 130                      | Health Post                          | __ |
|                                                                                                                              |                                                                                       | 131                      | With HEW (at her house or elsewhere) | __ |
|                                                                                                                              |                                                                                       | 132                      | Pharmacy                             | __ |
|                                                                                                                              |                                                                                       | 133                      | Traditional Healers                  |    |
|                                                                                                                              |                                                                                       | 134                      | Other –                              | __ |
|                                                                                                                              | 135                                                                                   | Specify _____            |                                      |    |

Instruction: From Question HEW\_132-HEW\_207  
 Don't prompt. Select all mentioned

|                                                                                                       |                          |                                           |    |
|-------------------------------------------------------------------------------------------------------|--------------------------|-------------------------------------------|----|
| What are the main components of immediate newborn care?<br><br>Do not prompt<br>Select all mentioned. | For each: 1 = Yes 2 = No |                                           |    |
|                                                                                                       | 136                      | Deliver baby onto mother's abdomen        | __ |
|                                                                                                       | 137                      | Dry and wrap baby                         | __ |
|                                                                                                       | 138                      | Assess breathing                          | __ |
|                                                                                                       | 139                      | Delay cord clamping for three minutes     | __ |
|                                                                                                       | 140                      | Tie and cut cord appropriately            | __ |
|                                                                                                       | 141                      | Skin to skin contact                      | __ |
|                                                                                                       | 142                      | Initiate breastfeeding                    | __ |
|                                                                                                       | 143                      | Apply TTC eye ointment                    | __ |
|                                                                                                       | 144                      | Apply chlorohexidine on cord              | __ |
|                                                                                                       | 145                      | Give Vitamin K                            | __ |
|                                                                                                       | 146                      | Weight baby                               | __ |
|                                                                                                       | 999                      | None mentioned from the list              |    |
| What are the main components of the first PNC visit for newborn?                                      | For each: 1 = Yes 2 = No |                                           |    |
|                                                                                                       | 147                      | Advice washing hands before touching baby | __ |

|    |                                                                                                                                                                               |                                                                                                                                                                                        |                                                                                 |                          |
|----|-------------------------------------------------------------------------------------------------------------------------------------------------------------------------------|----------------------------------------------------------------------------------------------------------------------------------------------------------------------------------------|---------------------------------------------------------------------------------|--------------------------|
| 1  | Do not prompt<br>Select all mentioned                                                                                                                                         | 148                                                                                                                                                                                    | Check for danger sings                                                          | <input type="checkbox"/> |
| 2  |                                                                                                                                                                               | 149                                                                                                                                                                                    | Check for congenital abnormalities                                              | <input type="checkbox"/> |
| 3  |                                                                                                                                                                               | 150                                                                                                                                                                                    | Measure temp                                                                    | <input type="checkbox"/> |
| 4  |                                                                                                                                                                               | 151                                                                                                                                                                                    | Measure weight                                                                  | <input type="checkbox"/> |
| 5  |                                                                                                                                                                               | 152                                                                                                                                                                                    | Apply TTC eye ointment                                                          | <input type="checkbox"/> |
| 6  |                                                                                                                                                                               | 153                                                                                                                                                                                    | Encourage exclusive breast feeding for baby                                     | <input type="checkbox"/> |
| 7  |                                                                                                                                                                               | 154                                                                                                                                                                                    | Advice to delay bathing of baby for 24 hrs                                      | <input type="checkbox"/> |
| 8  |                                                                                                                                                                               | 155                                                                                                                                                                                    | Encourage skin to skin contact                                                  | <input type="checkbox"/> |
| 9  |                                                                                                                                                                               | 156                                                                                                                                                                                    | Provide cord care (Chlorohexidine)                                              | <input type="checkbox"/> |
| 10 |                                                                                                                                                                               | 157                                                                                                                                                                                    | Education on appropriate cord care (Chlorohexidine)                             | <input type="checkbox"/> |
| 11 |                                                                                                                                                                               | 158                                                                                                                                                                                    | Vaccinate for polio and BCG                                                     | <input type="checkbox"/> |
| 12 |                                                                                                                                                                               | 159                                                                                                                                                                                    | Teach mother on how to recognize newborn danger signs using family health card. | <input type="checkbox"/> |
| 13 |                                                                                                                                                                               | 999                                                                                                                                                                                    | None mentioned from the list                                                    |                          |
| 14 |                                                                                                                                                                               | <b>What are the main components of subsequent (3<sup>rd</sup> and 7<sup>th</sup> day and 6<sup>th</sup> week) PNC visits for newborn?</b><br><br>Do not prompt<br>Select all mentioned | <b>For each: 1 = Yes 2 = No</b>                                                 |                          |
| 15 | 160                                                                                                                                                                           |                                                                                                                                                                                        | Check for newborn danger signs                                                  | <input type="checkbox"/> |
| 16 | 161                                                                                                                                                                           |                                                                                                                                                                                        | Advice to keep cord clean                                                       | <input type="checkbox"/> |
| 17 | 162                                                                                                                                                                           |                                                                                                                                                                                        | Assess breastfeeding                                                            | <input type="checkbox"/> |
| 18 | 163                                                                                                                                                                           |                                                                                                                                                                                        | Advise on breastfeeding                                                         | <input type="checkbox"/> |
| 19 | 164                                                                                                                                                                           |                                                                                                                                                                                        | Ensure baby is kept warm                                                        | <input type="checkbox"/> |
| 20 | 165                                                                                                                                                                           |                                                                                                                                                                                        | Check baby's weight                                                             | <input type="checkbox"/> |
| 21 | 166                                                                                                                                                                           |                                                                                                                                                                                        | Vaccination                                                                     | <input type="checkbox"/> |
| 22 | 999                                                                                                                                                                           | None mentioned from the list                                                                                                                                                           |                                                                                 |                          |
| 23 | <b>When a newborn weighs less than 1.5 kgs or has a gestational age of less than 32 weeks, what special care do you provide?</b><br><br>Do not prompt<br>Select all mentioned | <b>For each: 1 = Yes 2 = No</b>                                                                                                                                                        |                                                                                 |                          |
| 24 |                                                                                                                                                                               | 167                                                                                                                                                                                    | Continue feeding with expressed breast milk                                     | <input type="checkbox"/> |
| 25 |                                                                                                                                                                               | 168                                                                                                                                                                                    | Monitor ability to breastfeed                                                   | <input type="checkbox"/> |
| 26 |                                                                                                                                                                               | 169                                                                                                                                                                                    | Cover baby well including head                                                  | <input type="checkbox"/> |
| 27 |                                                                                                                                                                               | 170                                                                                                                                                                                    | Hold close to mother                                                            | <input type="checkbox"/> |
| 28 |                                                                                                                                                                               | 171                                                                                                                                                                                    | Refer urgently with mother to health center or hospital                         | <input type="checkbox"/> |
| 29 | 999                                                                                                                                                                           | None mentioned from the list                                                                                                                                                           |                                                                                 |                          |
| 30 | <b>When a newborn weighs between 1.5 - 2.5 kgs or has a gestational age of 32-37 weeks, what special care do you provide?</b><br><br>Do not prompt<br>Select all mentioned    | <b>For each: 1 = Yes 2 = No</b>                                                                                                                                                        |                                                                                 |                          |
| 31 |                                                                                                                                                                               | 172                                                                                                                                                                                    | Make sure the baby is warm                                                      | <input type="checkbox"/> |
| 32 |                                                                                                                                                                               | 173                                                                                                                                                                                    | Educate on optimal breastfeeding                                                | <input type="checkbox"/> |
| 33 |                                                                                                                                                                               | 174                                                                                                                                                                                    | Monitor ability to breastfeed                                                   | <input type="checkbox"/> |
| 34 |                                                                                                                                                                               | 175                                                                                                                                                                                    | Monitor baby for the first 24 hours                                             | <input type="checkbox"/> |
| 35 |                                                                                                                                                                               | 176                                                                                                                                                                                    | Educate on infection prevention                                                 | <input type="checkbox"/> |
| 36 | 999                                                                                                                                                                           | None mentioned from the list                                                                                                                                                           |                                                                                 |                          |
| 37 | <b>What are the main signs for good attachment</b>                                                                                                                            | <b>For each: 1 = Yes 2 = No</b>                                                                                                                                                        |                                                                                 |                          |

|                                                                                                                                            |                                                                                                                            |                                                                                                                                |    |
|--------------------------------------------------------------------------------------------------------------------------------------------|----------------------------------------------------------------------------------------------------------------------------|--------------------------------------------------------------------------------------------------------------------------------|----|
| during breast feeding?<br>Do not prompt<br>Select all mentioned                                                                            | 177                                                                                                                        | Chin touching breast                                                                                                           | __ |
|                                                                                                                                            | 178                                                                                                                        | Mouth open wide                                                                                                                | __ |
|                                                                                                                                            | 179                                                                                                                        | Lower lip turned out                                                                                                           | __ |
|                                                                                                                                            | 180                                                                                                                        | More areola showing above                                                                                                      | __ |
|                                                                                                                                            | 999                                                                                                                        | None mentioned from the list                                                                                                   |    |
| How do you determine feeding problems in a newborn?<br>Do not prompt<br>Select all mentioned                                               | <b>For each: 1 = Yes 2 = No</b>                                                                                            |                                                                                                                                |    |
|                                                                                                                                            | 181                                                                                                                        | Not well-attached to breast                                                                                                    | __ |
|                                                                                                                                            | 182                                                                                                                        | Not suckling effectively                                                                                                       | __ |
|                                                                                                                                            | 183                                                                                                                        | Less than 8 breastfeeds in 24 hours                                                                                            | __ |
|                                                                                                                                            | 184                                                                                                                        | Switching to another breast before one is emptied                                                                              | __ |
|                                                                                                                                            | 185                                                                                                                        | Receives other foods or drinks (even water)                                                                                    | __ |
|                                                                                                                                            | 186                                                                                                                        | Underweight for age                                                                                                            | __ |
|                                                                                                                                            | 187                                                                                                                        | Thrush (ulcers or white patches in mouth)                                                                                      | __ |
|                                                                                                                                            | 999                                                                                                                        | None mentioned from the list                                                                                                   |    |
| When a newborn shows signs of feeding problems or is underweight, what initial steps do you take?<br>Do not prompt<br>Select all mentioned | <b>For each: 1 = Yes 2 = No</b>                                                                                            |                                                                                                                                |    |
|                                                                                                                                            | 188                                                                                                                        | Advise mother to breastfeed as often and as long as infant wants in 24 hours                                                   | __ |
|                                                                                                                                            | 189                                                                                                                        | Teach mother correct positioning and attachment                                                                                | __ |
|                                                                                                                                            | 190                                                                                                                        | Educate on exclusive breastfeeding                                                                                             | __ |
|                                                                                                                                            | 191                                                                                                                        | Teach the mother to treat thrush at home                                                                                       | __ |
|                                                                                                                                            | 192                                                                                                                        | Follow-up any feeding problem                                                                                                  | __ |
|                                                                                                                                            | 193                                                                                                                        | Follow-up any thrush in two days                                                                                               | __ |
|                                                                                                                                            | 194                                                                                                                        | Follow-up underweight for age in 14 days                                                                                       | __ |
|                                                                                                                                            | 999                                                                                                                        | None mentioned from the list                                                                                                   |    |
| What are the main signs for very severe disease in newborns?<br>Do not prompt<br>Select all mentioned                                      | <b>For each: 1 = Yes 2 = No</b>                                                                                            |                                                                                                                                |    |
|                                                                                                                                            | 195                                                                                                                        | Convulsions                                                                                                                    | __ |
|                                                                                                                                            | 196                                                                                                                        | Stopped feeding or significantly reduced feeding                                                                               | __ |
|                                                                                                                                            | 197                                                                                                                        | Severe chest in drawing                                                                                                        | __ |
|                                                                                                                                            | 198                                                                                                                        | Fast breathing                                                                                                                 | __ |
|                                                                                                                                            | 199                                                                                                                        | Temperature with 37.5 or more (warm)<br><i>(Note: if high temperature only mentioned ask for clarification to what extent)</i> | __ |
| 200                                                                                                                                        | Temperature less than 35.5 (cold)<br><i>(Note: if low temperature only mentioned ask for clarification to what extent)</i> | __                                                                                                                             |    |
| 201                                                                                                                                        | No or very limited movement on stimulation                                                                                 | __                                                                                                                             |    |



|                                                                                                                                                   |                                                                                          |     |                                                                                      |    |
|---------------------------------------------------------------------------------------------------------------------------------------------------|------------------------------------------------------------------------------------------|-----|--------------------------------------------------------------------------------------|----|
|                                                                                                                                                   |                                                                                          | 999 | None mentioned from the list                                                         |    |
| <b>When the newborn presents sign of very severe disease, what initial steps do you take?</b><br><br>Do not prompt<br>Select all mentioned        | <b>For each: 1 = Yes 2 = No</b>                                                          |     |                                                                                      |    |
|                                                                                                                                                   |                                                                                          | 202 | Continue to breastfeed or if unable to suck give breast milk that has been expressed | __ |
|                                                                                                                                                   |                                                                                          | 203 | Begin a dose of amoxicillin (pre-referral)                                           | __ |
|                                                                                                                                                   |                                                                                          | 204 | Begin a dose of gentamycin antibiotics (pre-referral)                                | __ |
|                                                                                                                                                   |                                                                                          | 205 | Refer URGENTLY                                                                       | __ |
|                                                                                                                                                   |                                                                                          | 206 | When referral is not possible treat with/prescribe amoxicillin for 7 days            | __ |
|                                                                                                                                                   |                                                                                          | 207 | When referral is not possible treat with gentamycin daily for 7 days                 | __ |
|                                                                                                                                                   |                                                                                          | 999 | None mentioned from the list                                                         |    |
| <b>What are the main signs for local bacterial infection in newborns?</b><br><br>Do not prompt<br>Select all mentioned                            | <b>For each: 1 = Yes 2 = No</b>                                                          |     |                                                                                      |    |
|                                                                                                                                                   |                                                                                          | 208 | Umbilicus red                                                                        | __ |
|                                                                                                                                                   |                                                                                          | 209 | Umbilicus draining pus                                                               | __ |
|                                                                                                                                                   |                                                                                          | 210 | Skin pustules                                                                        | __ |
|                                                                                                                                                   |                                                                                          | 999 | None mentioned from the list                                                         |    |
| <b>When the newborn presents signs of local bacterial infection, what initial steps do you take?</b><br><br>Do not prompt<br>Select all mentioned | <b>For each: 1 = Yes 2 = No</b>                                                          |     |                                                                                      |    |
|                                                                                                                                                   |                                                                                          | 211 | Give amoxicillin syrup for 5 days                                                    | __ |
|                                                                                                                                                   |                                                                                          | 212 | Follow up care on 2 <sup>nd</sup> day from initial visit                             | __ |
|                                                                                                                                                   |                                                                                          | 213 | Advise mother when to return                                                         | __ |
|                                                                                                                                                   |                                                                                          | 214 | Breastfeed more frequently                                                           | __ |
|                                                                                                                                                   |                                                                                          | 215 | Advise mother to give breast milk more frequently                                    | __ |
|                                                                                                                                                   |                                                                                          | 216 | Advise mother to keep baby warm                                                      | __ |
|                                                                                                                                                   |                                                                                          | 999 | None mentioned from the list                                                         |    |
| 217                                                                                                                                               | Are there any possible side effects of using injectable gentamicin for neonatal illness? |     | 1= Yes –<br>2 = No – Skip to 228                                                     | __ |
| <b>For each: 1 = Yes 2 = No</b>                                                                                                                   |                                                                                          |     |                                                                                      |    |
| 218                                                                                                                                               | What are the possible side effects of using injectable gentamicin for neonatal illness?  |     |                                                                                      |    |
| <b>What are the possible side effects of using injectable gentamicin for neonatal illness?</b>                                                    |                                                                                          | 218 | Kidney damage (nephropathy)                                                          | __ |
|                                                                                                                                                   |                                                                                          | 219 | Nerve damage (neuropathy especially hearing or visual damage)                        | __ |
|                                                                                                                                                   |                                                                                          | 220 | Hearing loss                                                                         | __ |
|                                                                                                                                                   |                                                                                          | 221 | Lethargy                                                                             | __ |
|                                                                                                                                                   |                                                                                          | 222 | Nausea/vomiting                                                                      | __ |

|                                                                                                           |                                                                                                                                             |                                                                                                                |                                                                                            |    |
|-----------------------------------------------------------------------------------------------------------|---------------------------------------------------------------------------------------------------------------------------------------------|----------------------------------------------------------------------------------------------------------------|--------------------------------------------------------------------------------------------|----|
|                                                                                                           |                                                                                                                                             | 223                                                                                                            | General anaphylactic reaction                                                              | __ |
|                                                                                                           |                                                                                                                                             | 224                                                                                                            | Fever                                                                                      | __ |
|                                                                                                           |                                                                                                                                             | 225                                                                                                            | Poor appetite                                                                              | __ |
|                                                                                                           |                                                                                                                                             | 226                                                                                                            | Weight loss                                                                                | __ |
|                                                                                                           |                                                                                                                                             | 227                                                                                                            | Skin rash                                                                                  | __ |
| 228                                                                                                       | Is there any contraindication of using injectable gentamicin for the neonatal illness?                                                      | <b>1= Yes<br/>2 = No – 232</b>                                                                                 |                                                                                            |    |
| <b>What are those possible contraindications of using injectable gentamicin for the neonatal illness?</b> |                                                                                                                                             | <b>For each: 1 = Yes 2 = No</b>                                                                                |                                                                                            |    |
|                                                                                                           |                                                                                                                                             | 229                                                                                                            | History of general body reaction or shock to injectable gentamicin (Anaphylactic reaction) | __ |
|                                                                                                           |                                                                                                                                             | 230                                                                                                            | History of kidney/urine problem                                                            | __ |
|                                                                                                           |                                                                                                                                             | 231                                                                                                            | History of skin reaction to gentamicin                                                     | __ |
| 232                                                                                                       | Are there any possible side effects of using amoxicillin for the neonatal illness?                                                          | <b>1= Yes<br/>2 = No – 234</b>                                                                                 |                                                                                            | __ |
|                                                                                                           |                                                                                                                                             | <b>For each: 1 = Yes 2 = No</b>                                                                                |                                                                                            |    |
| 233                                                                                                       | What are the possible side effects of using amoxicillin for the neonatal illness?                                                           | 1 = General anaphylactic reaction (penicillin hypersensitivity)<br>9. Not mentioned                            |                                                                                            | __ |
| 234                                                                                                       | Is there any contraindication of using amoxicillin for the neonatal illness?                                                                | <b>1= Yes<br/>2 = No – GO TO 236</b>                                                                           |                                                                                            | __ |
|                                                                                                           |                                                                                                                                             | <b>For each: 1 = Yes 2 = No</b>                                                                                |                                                                                            |    |
| 235                                                                                                       | What are those possible contraindications of using amoxicillin for the neonatal illness                                                     | 1 = History of General body reaction or shock to amoxicillin (penicillin hypersensitivity)<br>9. Not mentioned |                                                                                            | __ |
| 236                                                                                                       | Are there any possible additional side effects of using antibiotics (injectable gentamicin or amoxicillin) for non-severe neonatal illness? | <b>1= Yes<br/>2 = No – 238</b>                                                                                 |                                                                                            | __ |
|                                                                                                           |                                                                                                                                             | <b>For each: 1 = Yes 2 = No</b>                                                                                |                                                                                            |    |
| 237                                                                                                       | What are those additional side effects of using antibiotics (injectable gentamicin or amoxicillin) for non-severe neonatal illness?         | 1 = Drug resistance<br>9. Not mentioned                                                                        |                                                                                            | __ |
| <b>What are the main signs for jaundice in newborns?</b>                                                  |                                                                                                                                             | <b>For each: 1 = Yes 2 = No</b>                                                                                |                                                                                            |    |
| Do not prompt<br>Select all mentioned                                                                     |                                                                                                                                             | 238                                                                                                            | Yellow skin                                                                                | __ |
|                                                                                                           |                                                                                                                                             | 239                                                                                                            | Yellow eyes                                                                                | __ |
|                                                                                                           |                                                                                                                                             | 999                                                                                                            | Not mentioned                                                                              |    |
| <b>When the newborn presents signs of jaundice, what initial steps do you take?</b>                       |                                                                                                                                             | <b>For each: 1 = Yes 2 = No</b>                                                                                |                                                                                            |    |
| Do not prompt<br>Select all mentioned                                                                     |                                                                                                                                             | 240                                                                                                            | Breastfeed more frequently                                                                 | __ |
|                                                                                                           |                                                                                                                                             | 241                                                                                                            | Advise mother to keep young infant warm                                                    | __ |
|                                                                                                           |                                                                                                                                             | 242                                                                                                            | Expose to sunshine 20 to 30 minutes every day                                              | __ |

|                                                                                                                                                              |                                 |                                                                               |    |
|--------------------------------------------------------------------------------------------------------------------------------------------------------------|---------------------------------|-------------------------------------------------------------------------------|----|
|                                                                                                                                                              | 243                             | Advise mother to return immediately if sign & symptoms of jaundice aggravates | __ |
|                                                                                                                                                              | 244                             | Follow-up in 2 days                                                           | __ |
| <b>What are the main symptoms/signs for severe jaundice in newborns?</b><br><br>Do not prompt<br>Select all mentioned                                        | <b>For each: 1 = Yes 2 = No</b> |                                                                               |    |
|                                                                                                                                                              | 245                             | Jaundice in newborns of Age 14 days or more                                   | __ |
|                                                                                                                                                              | 246                             | Jaundice in newborns of Age less than 24 hours                                | __ |
|                                                                                                                                                              | 247                             | Palms yellow                                                                  | __ |
|                                                                                                                                                              | 248                             | Soles yellow                                                                  | __ |
|                                                                                                                                                              | 999                             | Not mentioned from the list                                                   |    |
| <b>When the newborn presents symptoms /signs of severe jaundice what initial steps do you take?</b><br><br>Do not prompt<br>Select all mentioned             | <b>For each: 1 = Yes 2 = No</b> |                                                                               |    |
|                                                                                                                                                              | 249                             | Breastfeed more frequently                                                    | __ |
|                                                                                                                                                              | 250                             | Refer URGENTLY to health center /hospital                                     | __ |
|                                                                                                                                                              | 251                             | Keep the baby warm                                                            | __ |
| <b>What are the main signs for some dehydration caused by diarrhea in newborns?</b><br><br>Do not prompt<br>Select all mentioned                             | <b>For each: 1 = Yes 2 = No</b> |                                                                               |    |
|                                                                                                                                                              | 252                             | Restless and irritable                                                        | __ |
|                                                                                                                                                              | 253                             | Sunken eyes                                                                   | __ |
|                                                                                                                                                              | 254                             | Skin pinch goes back slowly                                                   | __ |
|                                                                                                                                                              | 999                             | None mentioned from the list                                                  |    |
| <b>When the newborn presents signs of some dehydration caused by diarrhea what initial steps do you take?</b><br><br>Do not prompt<br>Select all mentioned   | <b>For each: 1 = Yes 2 = No</b> |                                                                               |    |
|                                                                                                                                                              | 255                             | Give ORS fluids                                                               | __ |
|                                                                                                                                                              | 256                             | Give zinc treatment for 10 days                                               | __ |
|                                                                                                                                                              | 257                             | Advise mother to breastfeed more frequently and longer                        | __ |
|                                                                                                                                                              | 258                             | Keep the infant warm                                                          | __ |
|                                                                                                                                                              | 259                             | Advise mother when to return                                                  | __ |
|                                                                                                                                                              | 260                             | Follow up in 2 days                                                           | __ |
|                                                                                                                                                              | 999                             | None mentioned from the list                                                  |    |
| <b>What are the main symptoms/signs for severe dehydration caused by diarrhea in newborns?</b><br><br>Do not prompt<br>Select all mentioned                  | <b>For each: 1 = Yes 2 = No</b> |                                                                               |    |
|                                                                                                                                                              | 261                             | Limited or No movement even when stimulated                                   | __ |
|                                                                                                                                                              | 262                             | Sunken eyes                                                                   | __ |
|                                                                                                                                                              | 263                             | Skin pinch goes back VERY slowly                                              | __ |
|                                                                                                                                                              | 999                             | None mentioned from the list                                                  |    |
| <b>When the newborn presents signs of severe dehydration caused by diarrhea what initial steps do you take?</b><br><br>Do not prompt<br>Select all mentioned | 264                             | Give first dose of amoxicillin syrup                                          | __ |
|                                                                                                                                                              | 265                             | Give first dose of IM Gentamycin                                              | __ |
|                                                                                                                                                              | 266                             | Refer URGENTLY to health center/hospital                                      | __ |
|                                                                                                                                                              | 267                             | Ensure mother gives child ORS on the way to health center/hospital            | __ |
|                                                                                                                                                              | 268                             | Advise mother to breastfeed more                                              | __ |

|                                                                                                                                             |                                 |                                                               |    |
|---------------------------------------------------------------------------------------------------------------------------------------------|---------------------------------|---------------------------------------------------------------|----|
|                                                                                                                                             |                                 | frequently and longer                                         |    |
|                                                                                                                                             | 269                             | Advise mother to keep young infant warm                       | __ |
| <b>What are the main signs and symptoms of pneumonia in a child aged 2-59 months?</b><br><br>Do not prompt<br>Select all mentioned          | <b>For each: 1 = Yes 2 = No</b> |                                                               |    |
|                                                                                                                                             | 270                             | Cough                                                         | __ |
|                                                                                                                                             | 271                             | Difficult or fast breathing                                   | __ |
|                                                                                                                                             | 272                             | Chest indrawing                                               | __ |
|                                                                                                                                             | 273                             | Stridor                                                       | __ |
|                                                                                                                                             | 999                             |                                                               |    |
| <b>When the child presents signs and symptoms of pneumonia what initial steps do you take?</b><br><br>Do not prompt<br>Select all mentioned | <b>For each: 1 = Yes 2 = No</b> |                                                               |    |
|                                                                                                                                             | 274                             | Give antibiotics                                              | __ |
|                                                                                                                                             | 275                             | Advise on when/how to administer                              | __ |
|                                                                                                                                             | 276                             | Keep the child warm                                           | __ |
|                                                                                                                                             | 277                             | Advise mother when to return                                  | __ |
|                                                                                                                                             | 999                             | None mentioned from the list                                  |    |
| <b>What are the main signs and symptoms of diarrhea in a child aged 2-59 months?</b><br><br>Do not prompt<br>Select all mentioned           | <b>For each: 1 = Yes 2 = No</b> |                                                               |    |
|                                                                                                                                             | 278                             | Diarrhea                                                      |    |
|                                                                                                                                             | 279                             | Blood in stool                                                |    |
|                                                                                                                                             | 280                             | Restless or irritable                                         |    |
|                                                                                                                                             | 281                             | Sunken eyes                                                   | __ |
|                                                                                                                                             | 282                             | Skin pinch goes back slowly                                   | __ |
|                                                                                                                                             | 999                             | None mentioned from the list                                  |    |
| <b>When the child presents signs and symptoms of diarrhea what initial steps do you take?</b><br><br>Do not prompt<br>Select all mentioned  | <b>For each: 1 = Yes 2 = No</b> |                                                               |    |
|                                                                                                                                             | 283                             | Give ORS fluids                                               | __ |
|                                                                                                                                             | 284                             | Give zinc treatment for 10 days                               | __ |
|                                                                                                                                             | 285                             | Advise on when/how to administer                              |    |
|                                                                                                                                             | 286                             | Advise mother to breastfeed / feed more frequently and longer | __ |
|                                                                                                                                             | 287                             | Keep the child warm                                           | __ |
|                                                                                                                                             | 288                             | Advise mother when to return                                  | __ |
|                                                                                                                                             | 289                             | Follow up in 2 days                                           |    |
|                                                                                                                                             | 999                             | None mentioned from the list                                  |    |
| <b>What are the main signs and symptoms of malaria in a child aged 2-59 months?</b><br><br>Do not prompt<br>Select all mentioned            | <b>For each: 1 = Yes 2 = No</b> |                                                               |    |
|                                                                                                                                             | 290                             | Fever                                                         | __ |
|                                                                                                                                             | 291                             | Chillis                                                       | __ |
| <b>When the child presents signs and symptoms of malaria what initial steps do you take?</b><br><br>Do not prompt<br>Select all mentioned   | <b>For each: 1 = Yes 2 = No</b> |                                                               |    |
|                                                                                                                                             | 292                             | Use RDT to test for malaria                                   | __ |
|                                                                                                                                             | 293                             | Treat malaria with Coartem / ACT                              | __ |
|                                                                                                                                             | 294                             | Advise on when/how to administer Coartem                      |    |
|                                                                                                                                             | 295                             | Advise mother when to return                                  | __ |
|                                                                                                                                             | 999                             | None mentioned from the list                                  |    |

|                                                                                                                                                      |                                 |                                                                   |    |
|------------------------------------------------------------------------------------------------------------------------------------------------------|---------------------------------|-------------------------------------------------------------------|----|
| <b>What are the main signs and symptoms of acute malnutrition in a child aged 2-59 months?</b><br><br>Do not prompt<br>Select all mentioned          | <b>For each: 1 = Yes 2 = No</b> |                                                                   |    |
|                                                                                                                                                      | 296                             | Pitting edema of both feet                                        | __ |
|                                                                                                                                                      | 297                             | Visible severe wasting                                            | __ |
|                                                                                                                                                      | 298                             | MUAC measurement <11cm (if 6 months or older)                     | __ |
|                                                                                                                                                      | 999                             | None mentioned from the list                                      |    |
| <b>When the child presents signs and symptoms of acute malnutrition what initial steps do you take?</b><br><br>Do not prompt<br>Select all mentioned | <b>For each: 1 = Yes 2 = No</b> |                                                                   |    |
|                                                                                                                                                      | 299                             | Appetite test if 6 months or older                                | __ |
|                                                                                                                                                      | 300                             | Give with RUTF (Plumpy nut or BP 100)                             | __ |
|                                                                                                                                                      | 301                             | Advise on when/how to take RUTF                                   | __ |
|                                                                                                                                                      | 302                             | Advise mother when to return                                      | __ |
|                                                                                                                                                      | 999                             | None mentioned from the list                                      |    |
| <b>What are general danger signs in child aged 2-59 months?</b><br><br>Do not prompt<br>Select all mentioned                                         | <b>For each: 1 = Yes 2 = No</b> |                                                                   |    |
|                                                                                                                                                      | 303                             | Unable to drink or breastfeed                                     | __ |
|                                                                                                                                                      | 304                             | Convulsions                                                       | __ |
|                                                                                                                                                      | 305                             | Movement only when stimulated or no movement even when stimulated | __ |
|                                                                                                                                                      | 999                             | None mentioned from the list                                      |    |
| <b>When the child presents with general danger signs and symptoms what initial steps do you take?</b><br><br>Do not prompt<br>Select all mentioned   | <b>For each: 1 = Yes 2 = No</b> |                                                                   |    |
|                                                                                                                                                      | 306                             | Refer to health centre                                            | __ |
|                                                                                                                                                      | 307                             | Give pre-referral dose and refer to health center                 | __ |
|                                                                                                                                                      | 308                             | Give ORS                                                          | __ |
|                                                                                                                                                      | 999                             | None mentioned from the list                                      |    |

#### MODULE 4: TRAINING OF THE HEW

**Interviewer:** *I would now like to ask you some questions on your training.*

**INTERVIEWER: PLEASE STATE THE START AND END MONTHS THAT CAPTURE THE PAST 12 MONTHS FROM THE DATE OF THE INTERVIEW AND INSERT IT INTO THE QUESTION BELOW.**

***Have you received training or training update from HC, Woreda health office or NGO in the last 12 months between \_\_\_\_\_ (start month) and \_\_\_\_\_ (end month) in?***

**[READ TOPIC]**

**FOR EACH QUESTION IF NO ASK THE FOLLOWING: *Did you receive a training or training update more than 12 months ago?***

**REPEAT BOTH QUESTIONS FOR EACH TOPIC**

|     |      | Yes, within past 12 months | Yes, over past 12 months ago | No in-service training or update |    |
|-----|------|----------------------------|------------------------------|----------------------------------|----|
| 309 | CBNC | 1                          | 2                            | 3                                | __ |

|                                                                                                               |                                                                                                                                                                        |                                                                                                                                                                                                    |                                |   |                          |                          |
|---------------------------------------------------------------------------------------------------------------|------------------------------------------------------------------------------------------------------------------------------------------------------------------------|----------------------------------------------------------------------------------------------------------------------------------------------------------------------------------------------------|--------------------------------|---|--------------------------|--------------------------|
| 310                                                                                                           | Providing antenatal services                                                                                                                                           | 1                                                                                                                                                                                                  | 2                              | 3 | <input type="checkbox"/> |                          |
| 311                                                                                                           | PMTCT                                                                                                                                                                  | 1                                                                                                                                                                                                  | 2                              | 3 | <input type="checkbox"/> |                          |
| 312                                                                                                           | Misoprostol use                                                                                                                                                        | 1                                                                                                                                                                                                  | 2                              | 3 | <input type="checkbox"/> |                          |
| 313                                                                                                           | Providing post-natal care to mother                                                                                                                                    | 1                                                                                                                                                                                                  | 2                              | 3 | <input type="checkbox"/> |                          |
| 314                                                                                                           | Providing postnatal care to newborn                                                                                                                                    | 1                                                                                                                                                                                                  | 2                              | 3 | <input type="checkbox"/> |                          |
| 315                                                                                                           | Clean cord care                                                                                                                                                        | 1                                                                                                                                                                                                  | 2                              | 3 | <input type="checkbox"/> |                          |
| 316                                                                                                           | Managing newborns with very severe disease                                                                                                                             | 1                                                                                                                                                                                                  | 2                              | 3 | <input type="checkbox"/> |                          |
| 317                                                                                                           | Managing newborn with local bacterial infection                                                                                                                        | 1                                                                                                                                                                                                  | 2                              | 3 | <input type="checkbox"/> |                          |
| 318                                                                                                           | Managing newborn neonates with jaundice/severe jaundice                                                                                                                | 1                                                                                                                                                                                                  | 2                              | 3 | <input type="checkbox"/> |                          |
| 319                                                                                                           | Managing neonates with diarrhea                                                                                                                                        | 1                                                                                                                                                                                                  | 2                              | 3 | <input type="checkbox"/> |                          |
| 320                                                                                                           | Managing neonates with feeding problem or who are underweight                                                                                                          | 1                                                                                                                                                                                                  | 2                              | 3 | <input type="checkbox"/> |                          |
| 321                                                                                                           | iCCM                                                                                                                                                                   | 1                                                                                                                                                                                                  | 2                              | 3 | <input type="checkbox"/> |                          |
| 322                                                                                                           | Using referral forms for VSD                                                                                                                                           | 1                                                                                                                                                                                                  | 2                              | 3 | <input type="checkbox"/> |                          |
| 323                                                                                                           | Using/filling family folder                                                                                                                                            | 1                                                                                                                                                                                                  | 2                              | 3 | <input type="checkbox"/> |                          |
| 324                                                                                                           | Integrated Refresher training on MNCH services                                                                                                                         | 1                                                                                                                                                                                                  | 2                              | 3 | <input type="checkbox"/> |                          |
| 325                                                                                                           | EPI                                                                                                                                                                    | 1                                                                                                                                                                                                  | 2                              | 3 | <input type="checkbox"/> |                          |
| 326                                                                                                           | Can you tell us whether or not you were satisfied with the quality of training received for managing sick neonate?<br><br><b>Do not give options to the respondent</b> | <b>1 = Yes was satisfied</b><br><b>2 = No was not satisfied – GO TO 328</b><br><b>3 = Neither satisfied nor dissatisfied – GO TO 329</b><br><b>4= No training in the last 12 months –GO TO 335</b> |                                |   | <input type="checkbox"/> |                          |
| 327                                                                                                           | <b>IF YES</b> , then what was the level of satisfaction<br><br><b>Give both options to the respondent</b>                                                              | <b>1. Fully satisfied – GO TO 329</b><br><b>2. Somewhat satisfied – GO TO 329</b>                                                                                                                  |                                |   | <input type="checkbox"/> |                          |
| 328                                                                                                           | <b>IF NO</b> , then what was the level of dissatisfaction<br><br><b>Give both options to the respondent</b>                                                            | <b>1. Fully dissatisfied</b><br><b>2. Somewhat dissatisfied</b>                                                                                                                                    |                                |   | <input type="checkbox"/> |                          |
| How can the quality of the training be further improved<br><b>Read list.</b><br><b>Select all that apply.</b> |                                                                                                                                                                        | <b>For each: 1 = Yes 2 = No</b>                                                                                                                                                                    |                                |   |                          |                          |
|                                                                                                               |                                                                                                                                                                        | 329                                                                                                                                                                                                | More training                  |   |                          | <input type="checkbox"/> |
|                                                                                                               |                                                                                                                                                                        | 330                                                                                                                                                                                                | More practice sessions         |   |                          | <input type="checkbox"/> |
|                                                                                                               |                                                                                                                                                                        | 331                                                                                                                                                                                                | More training aids             |   |                          | <input type="checkbox"/> |
|                                                                                                               |                                                                                                                                                                        | 332                                                                                                                                                                                                | More post training supervision |   |                          | <input type="checkbox"/> |
|                                                                                                               |                                                                                                                                                                        | 333                                                                                                                                                                                                | Other – <b>GO TO 334</b>       |   |                          | <input type="checkbox"/> |
|                                                                                                               |                                                                                                                                                                        | 334                                                                                                                                                                                                | Specify _____                  |   |                          |                          |

## MODULE 5: SUPPORTIVE SUPERVISION

### INTERVIEWER:

*I would now like to ask some questions about supportive supervision you have received. By supportive supervision I mean being visited by individuals from the region, zone, woreda and/or health center to discuss, review and give feedback on your TECHNICAL or PROFESSIONAL work.*

**INTERVIEWER: PLEASE STATE THE START AND END MONTHS THAT CAPTURE THE PAST 6 MONTHS FROM THE DATE OF THE INTERVIEW AND INSERT IT INTO THE QUESTION BELOW.**

### LAST 6 MONTHS: STATE THE START & END MONTHS

**START MONTH** \_\_\_\_\_

**END MONTH** \_\_\_\_\_

|                                                                    |                                                                                |                                                                                                                                                                                                                                |                                                                                                   |
|--------------------------------------------------------------------|--------------------------------------------------------------------------------|--------------------------------------------------------------------------------------------------------------------------------------------------------------------------------------------------------------------------------|---------------------------------------------------------------------------------------------------|
| 335                                                                | Have you received a supportive supervisory visit in the last 6 months?         | 1 = Yes<br>2 = No – GO TO 366                                                                                                                                                                                                  | _ _                                                                                               |
| <b>IF YES: Who from?</b>                                           |                                                                                | <b>For each: 1 = Yes 2 = No</b>                                                                                                                                                                                                |                                                                                                   |
| <b>Select all that apply</b>                                       |                                                                                | 336                                                                                                                                                                                                                            | Woreda health office  _ _                                                                         |
|                                                                    |                                                                                | 337                                                                                                                                                                                                                            | PHCU/health centre  _ _                                                                           |
|                                                                    |                                                                                | 338                                                                                                                                                                                                                            | NGO  _ _                                                                                          |
| 339                                                                | <b>IF YES:</b> How many times did you receive this visit in the last 6 months? | <b>Enter total number of times</b><br><b>IF 0 skip to 342</b>                                                                                                                                                                  | _ _                                                                                               |
| 340                                                                | How many of these visits were in last 3 months?                                | <b>Enter total number of times</b><br><b>IF 0 skip to 342</b>                                                                                                                                                                  | _ _                                                                                               |
| 341                                                                | How many of these visits were in last 1 month?                                 | <b>Enter total number of times</b>                                                                                                                                                                                             | _ _                                                                                               |
| 342                                                                | Who provided the most recent supervisory visit?<br><b>Select one</b>           | 1 = Woreda Health Office<br>2 = Health Centre<br>3 = NGO<br>4 = Woreda Health Office and Health center<br>5 = Woreda Health Office and NGO<br>6 = Health Center and NGO<br>7 = All three together (Woreda, Health Center, NGO) | _ _                                                                                               |
| <b>IF YES to 335: Did that visit include any of the following?</b> |                                                                                | <b>For each: 1 = Yes 2 = No</b>                                                                                                                                                                                                |                                                                                                   |
| <b>Read all the following</b>                                      |                                                                                | 343                                                                                                                                                                                                                            | Discussing early identification of pregnancy  _ _                                                 |
|                                                                    |                                                                                | 344                                                                                                                                                                                                                            | Discussing provision focused ANC  _ _                                                             |
|                                                                    |                                                                                | 345                                                                                                                                                                                                                            | Discussing promotion of institutional delivery  _ _                                               |
|                                                                    |                                                                                | 346                                                                                                                                                                                                                            | Discussing safe and clean delivery  _ _                                                           |
|                                                                    |                                                                                | 347                                                                                                                                                                                                                            | Discussing immediate newborn care including cord care (chlorohexidine)  _ _                       |
|                                                                    |                                                                                | 348                                                                                                                                                                                                                            | Discussing recognition of asphyxia, initial stimulation, and resuscitation of newborn babies  _ _ |
|                                                                    |                                                                                | 349                                                                                                                                                                                                                            | Discussing prevention and management of hypothermia  _ _                                          |
|                                                                    |                                                                                | 350                                                                                                                                                                                                                            | Discussing management of pre-term and/or low  _ _                                                 |

|     |                                                                                                                 |                                                                                                      |    |
|-----|-----------------------------------------------------------------------------------------------------------------|------------------------------------------------------------------------------------------------------|----|
|     |                                                                                                                 | birth weight neonates                                                                                |    |
|     | 351                                                                                                             | Discussing management of very severe disease in newborns                                             | __ |
|     | 352                                                                                                             | Discussing diagnosis or treatment of suspected pneumonia                                             | __ |
|     | 353                                                                                                             | Discussing diagnosis or treatment of diarrhea                                                        | __ |
|     | 354                                                                                                             | Discussing diagnosis or treatment of malaria                                                         | __ |
|     | 355                                                                                                             | Discussing diagnosis or treatment of acute malnutrition                                              | __ |
|     | 356                                                                                                             | Discussing HEW activities with WDA                                                                   | __ |
|     | 357                                                                                                             | Observing record keeping                                                                             | __ |
|     | 358                                                                                                             | Checking the register for consistency and completeness                                               | __ |
|     | 359                                                                                                             | Checking supplies including training manuals, job aides, request forms                               | __ |
|     | 360                                                                                                             | Delivering supplies including /training manuals, job aides, request forms                            | __ |
|     | 361                                                                                                             | <u>Observing client Consultation with HEW</u>                                                        | __ |
|     | 362                                                                                                             | Conducted postnatal household visits together to observe HEWs skill on checking general danger signs | __ |
|     | 363                                                                                                             | Checking if they visited a sick neonate under treatment or that has been treated,                    | __ |
|     | 364                                                                                                             | Providing <u>WRITTEN</u> feedback to you on your work                                                | __ |
|     | 365                                                                                                             | <u>WRITTEN</u> feedback: copy of the last visit available and checked by the interviewer             | __ |
| 366 | Did you receive a follow up visit within 6 weeks of CBNC training to assess and support your <b>CBNC work</b> ? | <b>1 = Yes</b><br><b>2 = No – GO TO 371</b><br><b>3 = No CBNC training –GO TO 371</b>                | __ |
|     |                                                                                                                 | <b>For each: 1 = Yes 2 = No</b>                                                                      |    |
|     | If received CBNC post-training visit who conducted 6 weeks follow up visit?                                     | 367 Zone                                                                                             | __ |
|     | <b>Select all that apply</b>                                                                                    | 368 Woreda                                                                                           | __ |
|     |                                                                                                                 | 369 Health Center                                                                                    | __ |
|     |                                                                                                                 | 370 NGO                                                                                              | __ |



1  
2  
3  
4  
5  
6  
7  
8  
9  
10  
11  
12  
13  
14  
15  
16  
17  
18  
19  
20  
21  
22  
23  
24  
25  
26  
27  
28  
29  
30  
31  
32  
33  
34  
35  
36  
37  
38  
39  
40  
41  
42  
43  
44  
45  
46  
47  
48  
49  
50  
51  
52  
53  
54  
55  
56  
57  
58  
59  
60

|                                                                                                                     |                                                                                                                                                             |                                                                                                                                                                                                                     |                                                              |                          |
|---------------------------------------------------------------------------------------------------------------------|-------------------------------------------------------------------------------------------------------------------------------------------------------------|---------------------------------------------------------------------------------------------------------------------------------------------------------------------------------------------------------------------|--------------------------------------------------------------|--------------------------|
| 371                                                                                                                 | Can you tell us whether or not you were satisfied with the QUALITY of supportive supervision received in last six months?<br><br><b>Do not read options</b> | 1 = Yes was satisfied<br>2 = No was not satisfied – GO TO 373<br>3 = Neither satisfied nor dissatisfied – GO TO 374<br>4 = no supportive supervision in the last 6 months GO TO 379<br><br><input type="checkbox"/> |                                                              |                          |
| 372                                                                                                                 | IF YES, then what was the level of satisfaction?<br><br><b>Read options</b>                                                                                 | 1. Fully satisfied -GO TO 379<br>2. Somewhat satisfied -GO TO 374<br><br><input type="checkbox"/>                                                                                                                   |                                                              |                          |
| 373                                                                                                                 | IF NO, then what was the level of dissatisfaction?<br><br><b>Read options</b>                                                                               | 1. Fully dissatisfied<br>2. Somewhat dissatisfied<br><br><input type="checkbox"/>                                                                                                                                   |                                                              |                          |
| How can the quality of the supervision be further improved:<br><br><b>Read list</b><br><b>Select all that apply</b> |                                                                                                                                                             | For each: 1 = Yes 2 = No                                                                                                                                                                                            |                                                              |                          |
|                                                                                                                     |                                                                                                                                                             | 374                                                                                                                                                                                                                 | More visits                                                  | <input type="checkbox"/> |
|                                                                                                                     |                                                                                                                                                             | 375                                                                                                                                                                                                                 | More crash trainings during supervision                      | <input type="checkbox"/> |
|                                                                                                                     |                                                                                                                                                             | 376                                                                                                                                                                                                                 | More technical supervision                                   | <input type="checkbox"/> |
|                                                                                                                     |                                                                                                                                                             | 377                                                                                                                                                                                                                 | Other can the quality of the supervision be further improved | <input type="checkbox"/> |
| 378                                                                                                                 | Specify _____                                                                                                                                               | <input type="checkbox"/>                                                                                                                                                                                            |                                                              |                          |

For peer review only

**Interviewer:**  
*I would now like to ask you some questions about Performance Review and Clinical Mentoring Meeting (PRCMM) By this I mean when NGO, health center and health post staff meet together to review records, discuss performance, and ways to improve your TECHNICAL skills and achieve targets for CBNC/ICCM?*

**INTERVIEWER: PLEASE STATE THE START AND END MONTHS THAT CAPTURE THE PAST 6 MONTHS FROM THE DATE OF THE INTERVIEW AND INSERT IT INTO THE QUESTION BELOW.**

**LAST 6 MONTHS: STATE THE START & END MONTHS**

**START MONTH** \_\_\_\_\_

**END MONTH** \_\_\_\_\_

|                                                                                                                      |                                                                                                                                                                                                                                              |                                                                            |                                                                                  |   |
|----------------------------------------------------------------------------------------------------------------------|----------------------------------------------------------------------------------------------------------------------------------------------------------------------------------------------------------------------------------------------|----------------------------------------------------------------------------|----------------------------------------------------------------------------------|---|
| <b>379</b>                                                                                                           | In the past 6 months, did you participate in a PRCMM meeting, where the health center, health post and/or NGO staff met together to discuss performance, targets, and ways to improve HEWs' skills and achieve targets for CBNC and/or ICCM? | <b>1 = Yes</b><br><b>2 = No</b><br><b>3 = No CBNC and/or ICCM training</b> | _                                                                                |   |
| <b>380</b>                                                                                                           | Since training of CBNC and/or ICCM, have you participated in any PRCM meeting conducted in your Health center catchment area?                                                                                                                | <b>1 = Yes</b><br><b>2 = No – GO TO MODULE 6</b>                           | _                                                                                |   |
| <b>381</b>                                                                                                           | Did the meeting extract data from the HEW's 0-2 month (newborn) registers?                                                                                                                                                                   | <b>1 = Yes</b><br><b>2 = No</b>                                            | _                                                                                |   |
| <b>382</b>                                                                                                           | At that meeting, did your health center staff get a chance to offer mentoring on how to improve your newborn illness management skills?                                                                                                      | <b>1 = Yes</b><br><b>2 = No</b>                                            | _                                                                                |   |
| Did that meeting cover discussions on performance and targets on the following?<br><br><b>Read all the following</b> |                                                                                                                                                                                                                                              | <b>For each: 1 = Yes 2 = No</b>                                            |                                                                                  |   |
|                                                                                                                      |                                                                                                                                                                                                                                              | 383                                                                        | Early identification of pregnancy                                                | _ |
|                                                                                                                      |                                                                                                                                                                                                                                              | 384                                                                        | Focused ANC                                                                      | _ |
|                                                                                                                      |                                                                                                                                                                                                                                              | 385                                                                        | Promotion of institutional delivery                                              | _ |
|                                                                                                                      |                                                                                                                                                                                                                                              | 386                                                                        | Safe and clean delivery                                                          | _ |
|                                                                                                                      |                                                                                                                                                                                                                                              | 387                                                                        | Immediate newborn care including cord care (chlorohexidine)                      | _ |
|                                                                                                                      |                                                                                                                                                                                                                                              | 388                                                                        | Recognition of asphyxia, initial stimulation and resuscitation of newborn babies | _ |
|                                                                                                                      |                                                                                                                                                                                                                                              | 389                                                                        | Management of diarrhea among neonate                                             | _ |
|                                                                                                                      |                                                                                                                                                                                                                                              | 390                                                                        | Breast feeding among neonate                                                     | _ |
|                                                                                                                      |                                                                                                                                                                                                                                              | 391                                                                        | Immunization among neonate                                                       | _ |
|                                                                                                                      |                                                                                                                                                                                                                                              | 392                                                                        | Management of hypothermia                                                        | _ |
|                                                                                                                      |                                                                                                                                                                                                                                              | 393                                                                        | Management of pre-term and/or low birth weight neonates                          | _ |
| 394                                                                                                                  | Management of neonatal/very severe disease                                                                                                                                                                                                   | _                                                                          |                                                                                  |   |
| 395                                                                                                                  | Register review                                                                                                                                                                                                                              | _                                                                          |                                                                                  |   |
| 396                                                                                                                  | Community level observation                                                                                                                                                                                                                  | _                                                                          |                                                                                  |   |

## MODULE 6: HEWS SERVICES PROVIDED IN THE LAST 3 MONTHS

**Interviewer:** *I would now like to ask you about the services you provided in the last 3 months.*

**REFER TO HEW'S RECORD BOOKS (AT THE HEALTH POST REGISTERS) TO COMPLETE THE FOLLOWING; ONLY COUNT EVENTS ATTENDED BY THE SPECIFIC HEW BEING INTERVIEWED:**

**INTERVIEWER: PLEASE STATE THE START AND END MONTHS THAT CAPTURE THE PAST 3 MONTHS FROM THE DATE OF THE INTERVIEW AND INSERT IT INTO THE QUESTION BELOW.**

**LAST 3 MONTHS: STATE THE START & END MONTHS**

**START MONTH** \_\_\_\_\_

**END MONTH** \_\_\_\_\_

|                                                                                                                                                                           |                                                                                                                                  |                                                                                                                    |    |
|---------------------------------------------------------------------------------------------------------------------------------------------------------------------------|----------------------------------------------------------------------------------------------------------------------------------|--------------------------------------------------------------------------------------------------------------------|----|
| 397                                                                                                                                                                       | In the last three months did you use community <b>forums</b> and meeting to deliver maternal newborn and child health education? | 1 = Yes<br>2 = No – <b>GO TO 406</b>                                                                               | __ |
| <p>In the last three months did you meet any of the following to deliver maternal newborn and child health education?</p> <p><b>Read list. Choose all that apply.</b></p> |                                                                                                                                  |                                                                                                                    |    |
| <b>For each: 1 = Yes 2 = No</b>                                                                                                                                           |                                                                                                                                  |                                                                                                                    |    |
| 398                                                                                                                                                                       | Religious leaders                                                                                                                |                                                                                                                    | __ |
| 399                                                                                                                                                                       | Edir (Traditional community organization whose members assist each other during the mourning process)                            |                                                                                                                    | __ |
| 400                                                                                                                                                                       | Women's savings group                                                                                                            |                                                                                                                    | __ |
| 401                                                                                                                                                                       | Command post                                                                                                                     |                                                                                                                    | __ |
| 402                                                                                                                                                                       | Traditional birth attendants                                                                                                     |                                                                                                                    | __ |
| 403                                                                                                                                                                       | Other                                                                                                                            |                                                                                                                    | __ |
| 404                                                                                                                                                                       | Other Specify _____                                                                                                              |                                                                                                                    |    |
| 405                                                                                                                                                                       | When was the last time you used community <b>forum</b> and meeting to deliver maternal newborn and child health education?       | __ _ _ / __ _ _ / __ _ _ <br>dd / mm / yy                                                                          |    |
| 406                                                                                                                                                                       | Did you conduct pregnant women conference in the community in the last 3 months?                                                 | 1 = Yes<br>2 = No – <b>GO TO 411</b>                                                                               | __ |
| 407                                                                                                                                                                       | When was the last time you conducted a pregnant women's conference?                                                              | __ _ _ / __ _ _ / __ _ _ <br>dd / mm / yy                                                                          |    |
| 408                                                                                                                                                                       | How regularly do you conduct the pregnant women's conference?                                                                    | 1 = Once a week<br>2 = Every two weeks<br>3 = Once a month<br>4 = Every other month<br>5 = Once every three months | __ |

|     |                                                                                                                                   |                                         |       |
|-----|-----------------------------------------------------------------------------------------------------------------------------------|-----------------------------------------|-------|
| 409 | In the last pregnant women conference, how many women in your catchment area were pregnant?                                       | Enter number<br>Enter 999 if don't know | _ _ _ |
| 410 | Among them, how many of them attended the pregnant women's conference?<br>(The number should be $\leq$ numbers inserted in Q 408) | Enter number                            | _ _ _ |
| 411 | Did you provide ANC to any women in the last three months?                                                                        | 1 = Yes<br>2 = No – GO TO 412           | _     |
| 412 | IF YES: how many?                                                                                                                 | Enter number                            | _   _ |
| 413 | Did you refer any pregnant women from this health post to a health center or hospital in the last three months?                   | 1 = Yes<br>2 = No – GO TO 414           | _     |
| 414 | IF YES: how many?                                                                                                                 | Enter number                            | _   _ |
| 415 | Did you see any women to provide postpartum care in the last three months?                                                        | 1 = Yes<br>2 = No – GO TO 416           | _     |
| 416 | IF YES: How many women did you see for postpartum care in the last three months?                                                  | Enter number                            | _   _ |
| 417 | Did you refer any post-partum women from this health post to a health center or hospital in the past three months?                | 1 = Yes<br>2 = No – GO TO 418           | _     |
| 418 | IF YES: How many?                                                                                                                 | Enter number                            | _   _ |
| 419 | Did you see any newborns to provide a postnatal check for in the last three months?                                               | 1 = Yes<br>2 = No – GO TO 420           | _     |
| 420 | IF YES: How many newborns did you provide a postnatal check for in the last three months?                                         | Enter number                            | _   _ |
| 421 | Did you refer any newborns from this health post to a health center or hospital in the past three months?                         | 1 = Yes<br>2 = No – GO TO 422           | _     |
| 422 | IF YES: How many?                                                                                                                 | Enter number                            | _   _ |
| 423 | Did you give care for prevention of hypothermia in the last three months?                                                         | 1 = Yes<br>2 = No – GO TO 424           | _     |
| 424 | IF YES: How many?                                                                                                                 | Enter number                            | _   _ |
| 425 | Did you give care for management of hypothermia in the last three months?                                                         | 1 = Yes<br>2 = No – GO TO 426           | _     |
| 426 | IF YES: How many?                                                                                                                 | Enter number                            | _   _ |
| 427 | Did you provide care for pre-term and/or low birth weight neonates in the last three months?                                      | 1 = Yes<br>2 = No – GO TO 428           | _     |
| 428 | IF YES: How many?                                                                                                                 | Enter number                            | _     |
| 429 | Did you identify newborns with suspected very severe disease in the                                                               | 1 = Yes<br>2 = No – GO TO 430           | _     |

|     |                                                                                                                                                 |                                                                                                 |        |
|-----|-------------------------------------------------------------------------------------------------------------------------------------------------|-------------------------------------------------------------------------------------------------|--------|
|     | last three months?                                                                                                                              |                                                                                                 |        |
| 430 | <b>IF YES:</b> How many?                                                                                                                        | <b>Enter number</b>                                                                             | __     |
| 431 | Did you treat newborns with suspected very severe disease in the last three months?                                                             | <b>1 = Yes</b><br><b>2 = No – GO TO 433</b><br><b>3 = Antibiotics not available – GO TO 433</b> | __     |
| 432 | <b>IF YES:</b> how many?                                                                                                                        | <b>Enter number</b>                                                                             | __     |
| 433 | <b>IF YES:</b> how many completed the treatment at the health post?                                                                             | <b>Enter number</b>                                                                             | __     |
| 434 | Did you refer any newborns from this health post to a health center or hospital for very severe disease in the past three months?               | <b>1 = Yes</b><br><b>2 = No – GO TO 435</b>                                                     | __     |
| 435 | <b>IF YES:</b> How many?                                                                                                                        | <b>Enter number</b>                                                                             | __     |
| 436 | Did you see any newborns with diarrhea in the last three months?                                                                                | <b>1 = Yes</b><br><b>2 = No – GO TO 437</b>                                                     | __     |
| 437 | <b>IF YES,</b> how many?                                                                                                                        | <b>Enter number</b>                                                                             | __  __ |
| 438 | Did you see any newborns with jaundice in the last three months?                                                                                | <b>1 = Yes</b><br><b>2 = No – GO TO 439</b>                                                     | __     |
| 439 | <b>IF YES,</b> how many?                                                                                                                        | <b>Enter number</b>                                                                             | __  __ |
| 440 | Are the maternity record books completely up to date until the day before survey?(observe)                                                      | <b>1 = Yes</b><br><b>2 = No GO TO 442</b>                                                       | __     |
| 441 | What is number of maternity cases maintained in the last three months in the maternity register?                                                | <b>Enter number</b>                                                                             | __  __ |
| 442 | Did you see any children (2-59 months) for suspected pneumonia in the last three months?                                                        | <b>1 = Yes</b><br><b>2 = No – GO TO 443</b>                                                     | __     |
| 443 | <b>IF YES,</b> how many?                                                                                                                        | <b>Enter number</b>                                                                             | __  __ |
| 444 | Did you see any children (2-59 months) for diarrhea in the last three months?                                                                   | <b>1 = Yes</b><br><b>2 = No – GO TO 445</b>                                                     | __     |
| 445 | <b>IF YES,</b> how many?                                                                                                                        | <b>Enter number</b>                                                                             | __  __ |
| 446 | Did you see any children (2-59 months) for malaria in the last three months?                                                                    | <b>1 = Yes</b><br><b>2 = No – GO TO 447</b>                                                     | __     |
| 447 | <b>IF YES,</b> how many?                                                                                                                        | <b>Enter number</b>                                                                             | __  __ |
| 448 | Did you see any children (2-59 months) for acute malnutrition in the last three months?                                                         | <b>1 = Yes</b><br><b>2 = No – GO TO 449</b>                                                     | __     |
| 449 | <b>IF YES,</b> how many?                                                                                                                        | <b>Enter number</b>                                                                             | __  __ |
| 450 | Did you refer any children (2-59 months) from this health post to a health center or hospital for very severe disease in the past three months? | <b>1 = Yes</b><br><b>2 = No – Exit interview</b>                                                | __     |
| 451 | <b>IF YES:</b> How many?                                                                                                                        | <b>Enter number</b>                                                                             | __  __ |

**STROBE 2007 (v4) Statement—Checklist of items that should be included in reports of *cross-sectional studies***

| Section/Topic                | Item # | Recommendation                                                                                                                                                                       | Reported on page # |
|------------------------------|--------|--------------------------------------------------------------------------------------------------------------------------------------------------------------------------------------|--------------------|
| <b>Title and abstract</b>    | 1      | (a) Indicate the study's design with a commonly used term in the title or the abstract                                                                                               | 1                  |
|                              |        | (b) Provide in the abstract an informative and balanced summary of what was done and what was found                                                                                  | 2                  |
| <b>Introduction</b>          |        |                                                                                                                                                                                      |                    |
| Background/rationale         | 2      | Explain the scientific background and rationale for the investigation being reported                                                                                                 | 3-4                |
| Objectives                   | 3      | State specific objectives, including any prespecified hypotheses                                                                                                                     | 4                  |
| <b>Methods</b>               |        |                                                                                                                                                                                      |                    |
| Study design                 | 4      | Present key elements of study design early in the paper                                                                                                                              | 5                  |
| Setting                      | 5      | Describe the setting, locations, and relevant dates, including periods of recruitment, exposure, follow-up, and data collection                                                      | 4-5                |
| Participants                 | 6      | (a) Give the eligibility criteria, and the sources and methods of selection of participants                                                                                          | 5                  |
| Variables                    | 7      | Clearly define all outcomes, exposures, predictors, potential confounders, and effect modifiers. Give diagnostic criteria, if applicable                                             | 6-7                |
| Data sources/<br>measurement | 8*     | For each variable of interest, give sources of data and details of methods of assessment (measurement). Describe comparability of assessment methods if there is more than one group | 6-7                |
| Bias                         | 9      | Describe any efforts to address potential sources of bias                                                                                                                            | 6-7                |
| Study size                   | 10     | Explain how the study size was arrived at                                                                                                                                            | 5                  |
| Quantitative variables       | 11     | Explain how quantitative variables were handled in the analyses. If applicable, describe which groupings were chosen and why                                                         | 6-7                |
| Statistical methods          | 12     | (a) Describe all statistical methods, including those used to control for confounding                                                                                                | 7                  |
|                              |        | (b) Describe any methods used to examine subgroups and interactions                                                                                                                  | 7                  |
|                              |        | (c) Explain how missing data were addressed                                                                                                                                          | 7                  |
|                              |        | (d) If applicable, describe analytical methods taking account of sampling strategy                                                                                                   | 7                  |
|                              |        | (e) Describe any sensitivity analyses                                                                                                                                                | -                  |
| <b>Results</b>               |        |                                                                                                                                                                                      |                    |

|                          |     |                                                                                                                                                                                                              |               |
|--------------------------|-----|--------------------------------------------------------------------------------------------------------------------------------------------------------------------------------------------------------------|---------------|
| Participants             | 13* | (a) Report numbers of individuals at each stage of study—eg numbers potentially eligible, examined for eligibility, confirmed eligible, included in the study, completing follow-up, and analysed            | 8             |
|                          |     | (b) Give reasons for non-participation at each stage                                                                                                                                                         | -             |
|                          |     | (c) Consider use of a flow diagram                                                                                                                                                                           | -             |
| Descriptive data         | 14* | (a) Give characteristics of study participants (eg demographic, clinical, social) and information on exposures and potential confounders                                                                     | 8-9           |
|                          |     | (b) Indicate number of participants with missing data for each variable of interest                                                                                                                          | 8, 11, 13, 14 |
| Outcome data             | 15* | Report numbers of outcome events or summary measures                                                                                                                                                         | 11            |
| Main results             | 16  | (a) Give unadjusted estimates and, if applicable, confounder-adjusted estimates and their precision (eg, 95% confidence interval). Make clear which confounders were adjusted for and why they were included | 13-14         |
|                          |     | (b) Report category boundaries when continuous variables were categorized                                                                                                                                    | 9             |
|                          |     | (c) If relevant, consider translating estimates of relative risk into absolute risk for a meaningful time period                                                                                             | N/A           |
| Other analyses           | 17  | Report other analyses done—eg analyses of subgroups and interactions, and sensitivity analyses                                                                                                               | 12            |
| <b>Discussion</b>        |     |                                                                                                                                                                                                              |               |
| Key results              | 18  | Summarise key results with reference to study objectives                                                                                                                                                     | 15            |
| Limitations              | 19  | Discuss limitations of the study, taking into account sources of potential bias or imprecision. Discuss both direction and magnitude of any potential bias                                                   | 15            |
| Interpretation           | 20  | Give a cautious overall interpretation of results considering objectives, limitations, multiplicity of analyses, results from similar studies, and other relevant evidence                                   | 15 - 17       |
| Generalisability         | 21  | Discuss the generalisability (external validity) of the study results                                                                                                                                        | 15            |
| <b>Other information</b> |     |                                                                                                                                                                                                              |               |
| Funding                  | 22  | Give the source of funding and the role of the funders for the present study and, if applicable, for the original study on which the present article is based                                                | 18            |

\*Give information separately for cases and controls in case-control studies and, if applicable, for exposed and unexposed groups in cohort and cross-sectional studies.

**Note:** An Explanation and Elaboration article discusses each checklist item and gives methodological background and published examples of transparent reporting. The STROBE checklist is best used in conjunction with this article (freely available on the Web sites of PLoS Medicine at <http://www.plosmedicine.org/>, Annals of Internal Medicine at <http://www.annals.org/>, and Epidemiology at <http://www.epidem.com/>). Information on the STROBE Initiative is available at [www.strobe-statement.org](http://www.strobe-statement.org).
