# Supplementary material for: Health postservice readiness and use of preventive and curative services for suspected childhood pneumonia in Ethiopia: a cross-sectional study
Source: PubMed Central journal article supplement (PMC9047705; doi:10.1136/bmjopen-2021-058055), 2022-04-26
Supplement: bmjopen-2021-058055supp001.pdf [file bmjopen-2021-058055supp001.pdf]

# Dagu End line Household Survey 2018

## Module 1 – Household

| Section 1.1: Household identifiers |                                                             |                                                                                                |                                                                           |
|------------------------------------|-------------------------------------------------------------|------------------------------------------------------------------------------------------------|---------------------------------------------------------------------------|
| 100h                               | Date (dd/mm/yyyy)                                           | __/__/__                                                                                       |                                                                           |
| 101h                               | Region                                                      | _____                                                                                          |                                                                           |
| 102h                               | Zone                                                        | _____                                                                                          |                                                                           |
| 103h                               | Woreda                                                      | _____                                                                                          |                                                                           |
| 105h                               | Kebele                                                      | _____                                                                                          |                                                                           |
| 106h                               | Gote                                                        | _____                                                                                          |                                                                           |
| 107h                               | Cluster Code                                                | _____                                                                                          |                                                                           |
| 108h                               | Household Code                                              | ___                                                                                            |                                                                           |
| 109h                               | Unique household ID<br>(cluster / household code)           | _____/____                                                                                     |                                                                           |
| 110h                               | GPS Latitude                                                | _____<br>DEG                                                                                   | _____<br>MIN                                                              |
| 111h                               | GPS Longitude                                               | _____<br>DEG                                                                                   | _____<br>MIN                                                              |
| 113h                               | Elevation                                                   | _____                                                                                          |                                                                           |
| 114h                               | Interviewer initials                                        | __                                                                                             |                                                                           |
| 115h                               | <b>Interviewer:</b> Have you read him/her the consent form? | 1=Yes<br>2=No-one is available                                                                 | If the answer is No, fill the revisit form                                |
| 116h                               | <b>Interviewer:</b> Does the respondent agree?              | 1=Yes<br>2=No. END INTERVIEW                                                                   | If No Why? State the reason.                                              |
| 112h                               | Name of household head                                      | _____                                                                                          |                                                                           |
| 117h                               | What is the ethnic group of the household head?             | 01=Agew<br>02=Amhara<br>03=Konso<br>04=Burji<br>05=Kore<br>06=Gedeo<br>08=Derashe<br>09=Dawuro | 11=Konta<br>12=Ale<br>13=Oromo<br>15=Tigray<br>17=Other, Specify<br>_____ |

Household Listing with Household Head: Now I would like to ask you about people who are residents of this house. By resident, I mean everyone who has been present for the last 3 months and who normally eat together. *Start with head of the household and older people, then children from oldest to youngest.*

No. of Family members: **Including yourself how many family members do you have?** \_\_\_\_\_

| 118h_1<br>Unique ID | 118h_2<br>NAME | 118h_3<br>RELATIONSHIP                                                                                                                                                                                                                                                                               | 118h_4<br>SEX                                              | 118h_5<br>AGE                                                   | 118h_E<br>Eligible | 118h_6<br>DATE OF BIRTH                                | 118h_7<br>MARITAL STATUS                                                                                                                                          | 118h_8<br>RELIGION                                                                                | 118h_9<br>EDUCATION                                                                                                              | 118h_10-118h_15<br>ELIGIBILITY                                                                              |                                                                         |                                                                                                                      |
|---------------------|----------------|------------------------------------------------------------------------------------------------------------------------------------------------------------------------------------------------------------------------------------------------------------------------------------------------------|------------------------------------------------------------|-----------------------------------------------------------------|--------------------|--------------------------------------------------------|-------------------------------------------------------------------------------------------------------------------------------------------------------------------|---------------------------------------------------------------------------------------------------|----------------------------------------------------------------------------------------------------------------------------------|-------------------------------------------------------------------------------------------------------------|-------------------------------------------------------------------------|----------------------------------------------------------------------------------------------------------------------|
|                     |                | <b>What is the relationship of [Name] to the household head?</b><br><br>01=Head<br>02=Wife or husband<br>03=Son or daughter<br>04=In-law<br>05=Grandchild<br>06=Parent<br>08=Brother or sister<br>09=Niece or nephew<br>10=Adopted/stepchild<br>11=Other relative<br>12=Not related<br>99=Don't know | <b>Is [Name] male or female?</b><br><br>1=Male<br>2=Female | <b>How old is [Name]?</b><br><br>If less than 1 year write in 0 |                    | <b>What is [Name] date of birth?</b><br><br>dd/mm/yyyy | <b>For all born after 1966: Is [name] married?</b><br><br>1=Currently married<br>2= In a union<br>3=Not married or in a union<br>4=Divorced<br>5=Widowed<br>6=N/A | <b>For all: What religion is [name]?</b><br><br>1=Orthodox<br>3=Protestant<br>4=Muslim<br>8=Other | <b>How many years of formal education have they completed?</b><br><br><i>Enter number of formal years of education completed</i> | <b>CHECK: Is the person a woman 13-49 years?</b><br><br>From 1969 to 2005 (Eth: 1961-1997)<br>1=Yes<br>2=No | <b>CHECK: Is the person a child under 5 years?</b><br><br>1=Yes<br>2=No | <b>CHECK: If the household has a child under 5 years, is this person the primary caregiver?</b><br><br>1=Yes<br>2=No |
| 01                  | ---            | ---                                                                                                                                                                                                                                                                                                  | ---                                                        | ---                                                             |                    | --/--/--                                               | ---                                                                                                                                                               | ---                                                                                               | ---                                                                                                                              | ---                                                                                                         | ---                                                                     | ---                                                                                                                  |
| 02                  | ---            | ---                                                                                                                                                                                                                                                                                                  | ---                                                        | ---                                                             |                    | --/--/--                                               | ---                                                                                                                                                               | ---                                                                                               | ---                                                                                                                              | ---                                                                                                         | ---                                                                     | ---                                                                                                                  |
| 03                  | ---            | ---                                                                                                                                                                                                                                                                                                  | ---                                                        | ---                                                             |                    | --/--/--                                               | ---                                                                                                                                                               | ---                                                                                               | ---                                                                                                                              | ---                                                                                                         | ---                                                                     | ---                                                                                                                  |
| 04                  | ---            | ---                                                                                                                                                                                                                                                                                                  | ---                                                        | ---                                                             |                    | --/--/--                                               | ---                                                                                                                                                               | ---                                                                                               | ---                                                                                                                              | ---                                                                                                         | ---                                                                     | ---                                                                                                                  |
| 05                  | ---            | ---                                                                                                                                                                                                                                                                                                  | ---                                                        | ---                                                             |                    | --/--/--                                               | ---                                                                                                                                                               | ---                                                                                               | ---                                                                                                                              | ---                                                                                                         | ---                                                                     | ---                                                                                                                  |
| 06                  | ---            | ---                                                                                                                                                                                                                                                                                                  | ---                                                        | ---                                                             |                    | --/--/--                                               | ---                                                                                                                                                               | ---                                                                                               | ---                                                                                                                              | ---                                                                                                         | ---                                                                     | ---                                                                                                                  |
| 07                  | ---            | ---                                                                                                                                                                                                                                                                                                  | ---                                                        | ---                                                             |                    | --/--/--                                               | ---                                                                                                                                                               | ---                                                                                               | ---                                                                                                                              | ---                                                                                                         | ---                                                                     | ---                                                                                                                  |
| 08                  | ---            | ---                                                                                                                                                                                                                                                                                                  | ---                                                        | ---                                                             |                    | --/--/--                                               | ---                                                                                                                                                               | ---                                                                                               | ---                                                                                                                              | ---                                                                                                         | ---                                                                     | ---                                                                                                                  |
| 09                  | ---            | ---                                                                                                                                                                                                                                                                                                  | ---                                                        | ---                                                             |                    | --/--/--                                               | ---                                                                                                                                                               | ---                                                                                               | ---                                                                                                                              | ---                                                                                                         | ---                                                                     | ---                                                                                                                  |

| <b>Section 1.2: Characteristics of house and assets</b>                                                                  |                                                                                                         |                                                                                                                                                                                                                                   |   |
|--------------------------------------------------------------------------------------------------------------------------|---------------------------------------------------------------------------------------------------------|-----------------------------------------------------------------------------------------------------------------------------------------------------------------------------------------------------------------------------------|---|
| 119h                                                                                                                     | What is the main material of the roof?<br><i>Select one</i>                                             | 1 = Thatch/grass or leaves<br>2 = Iron sheets<br>8 = Other...specify                                                                                                                                                              | — |
| 120h                                                                                                                     | What is the main material of the walls? <i>Select one</i>                                               | 2 = Natural materials cane, wood, mud<br>4 = Stone with mud<br>5 = Stone with cement/bricks<br>8 = Other                                                                                                                          | — |
| 121h                                                                                                                     | What is the main floor material?<br><i>Select one</i>                                                   | 1 = Natural floor (earth/sand/dung)<br>2 = Rudimentary floor (wood/palm/bamboo)<br>3 = Finished floor (polished wood, cement, carpet)<br>8 = Other                                                                                | — |
| 122h                                                                                                                     | What kind of toilet facilities does your household have?                                                | 1= No facility/bush/field<br>2= Pit toilet/latrine<br>3= Ventilated improved pit latrine<br>8=Other                                                                                                                               | — |
| 123h                                                                                                                     | What is the main source of drinking water for members of your household?<br><br><i>Do Not read list</i> | 1=Piped water into dwelling<br>2=Piped water into compound<br>3=Public tap<br>4=Borehole in compound<br>6=Water from protected spring<br>8=Surface water (river/dam/lake etc)<br>9=Hand pump<br>10=Unprotected spring<br>88=Other | — |
| 124h                                                                                                                     | Do you do anything to the water to make it safer to drink?                                              | 1 = Yes<br>2 = No (SKIP TO 126)<br>3 = Don't know (SKIP TO 126)                                                                                                                                                                   | — |
| 125h                                                                                                                     | If Yes, what is the main thing you do?<br><br><i>Do Not read list</i>                                   | 1 = Let it stand and settle<br>2 = Strain through a cloth<br>3 = Use water filter (ceramic/sand/composite/etc)<br>4 = Boil<br>5 = Solar disinfection<br>6 = Add bleach/chlorine<br>8 = Other                                      | — |
| 126h                                                                                                                     | What type of fuel does your household mainly use for cooking?<br><i>Select one</i>                      | 1=Electricity<br>4=Charcoal<br>5=Firewood/straw<br>6=Dung<br>8=Other                                                                                                                                                              | — |
| 127h                                                                                                                     | Is the house connected to electricity?                                                                  | 1=Yes<br>2=No                                                                                                                                                                                                                     | — |
| <b>In total, how many the following items owned by residents of this household? Enter number of items (zero if None)</b> |                                                                                                         |                                                                                                                                                                                                                                   |   |
| 128h                                                                                                                     | How many <b>Wrist watch</b> ?                                                                           |                                                                                                                                                                                                                                   | — |
| 129h                                                                                                                     | How many <b>Gold (in grams)</b> ?                                                                       |                                                                                                                                                                                                                                   | — |
| 130h                                                                                                                     | How many <b>kerosene lamp/pressure lamps</b> ?                                                          |                                                                                                                                                                                                                                   | — |

|                                                                   |                                                                                                                                     |                                                                                                                                     |                                          |
|-------------------------------------------------------------------|-------------------------------------------------------------------------------------------------------------------------------------|-------------------------------------------------------------------------------------------------------------------------------------|------------------------------------------|
| 131h                                                              | How many <b>Solar lamp?</b>                                                                                                         |                                                                                                                                     | ___                                      |
| 132h                                                              | How many <b>beds?</b>                                                                                                               |                                                                                                                                     | ___                                      |
| 134h                                                              | How many <b>Mobile phone?</b>                                                                                                       |                                                                                                                                     | ___                                      |
| 137h                                                              | How many <b>Radio?</b>                                                                                                              |                                                                                                                                     | ___                                      |
| 138h                                                              | How many <b>TV?</b>                                                                                                                 |                                                                                                                                     | ___                                      |
| 142h                                                              | Do you own this house?                                                                                                              | 1 = Yes<br>2 = No                                                                                                                   | ___                                      |
| 143h                                                              | Does any member of the household own any agricultural land?                                                                         | 1 = Yes<br>2 = No                                                                                                                   | <b>SKIP TO 145</b>                       |
| 144h                                                              | How many hectares of agricultural land do members of this household own?                                                            | <i>Enter total number of hectares<br/>(If less than 1, Enter in decimals (example 0.5)<br/>Enter 9999 if hectares are Not known</i> |                                          |
| 145h                                                              | Does this household own any livestock, herds, other farm animals, or poultry?                                                       | 1 = Yes<br>2 = No                                                                                                                   | <b>SKIP TO 155</b>                       |
| <i>For each: Enter number. If None, enter 000</i>                 |                                                                                                                                     |                                                                                                                                     |                                          |
| <b>How many of the following animals does this household own?</b> |                                                                                                                                     |                                                                                                                                     |                                          |
| 146h                                                              | How many <b>chickens?</b>                                                                                                           |                                                                                                                                     | ___                                      |
| 147h                                                              | How many <b>goats?</b>                                                                                                              |                                                                                                                                     | ___                                      |
| 148h                                                              | How many <b>sheep?</b>                                                                                                              |                                                                                                                                     | ___                                      |
| 149h                                                              | How many <b>donkeys?</b>                                                                                                            |                                                                                                                                     | ___                                      |
| 150h                                                              | How many <b>horses?</b>                                                                                                             |                                                                                                                                     | ___                                      |
| 153h                                                              | How many <b>milk cows?</b>                                                                                                          |                                                                                                                                     | ___                                      |
| 154h                                                              | How many <b>ox (bulls)?</b>                                                                                                         |                                                                                                                                     | ___                                      |
| 155h                                                              | At any time in the past 12 months, has anyone come into your house to spray the interior walls of your dwelling against mosquitoes? | 1=Yes<br>2=No<br>9=Don't know                                                                                                       | <b>SKIP TO 158</b><br><b>SKIP TO 158</b> |
| 156h                                                              | What type of residual spray was done? ( <i>Probe if indoor residual spraying (IRS)</i> )                                            | 1=IRS<br>8=Other<br>9=Don't know                                                                                                    | ___                                      |
| 157h                                                              | How many months ago was the house last sprayed?                                                                                     | If less than one month write 00. If don't know write 99                                                                             | ___                                      |
| 158h                                                              | How many mosquito nets does your household have?                                                                                    | Write total number Count those in use plus those Not in use. If don't know write 9 if "0" SKIP TO MODULE 2                          | ___                                      |

| <b>Section 1.3: Household protection from malaria</b>                                         |                                                                                           |                                                                                                                                                                      |                        |               |               |
|-----------------------------------------------------------------------------------------------|-------------------------------------------------------------------------------------------|----------------------------------------------------------------------------------------------------------------------------------------------------------------------|------------------------|---------------|---------------|
| <i>Write total number of count those in use plus those Not in use (If don't know write 9)</i> |                                                                                           |                                                                                                                                                                      |                        |               |               |
|                                                                                               |                                                                                           |                                                                                                                                                                      | <b>Net #1</b>          | <b>Net #2</b> | <b>Net #3</b> |
| 159h                                                                                          | <i>Interviewer:</i> Is the Net 1 observed?                                                | 1=Yes<br>2=No                                                                                                                                                        | —                      | —             | —             |
| 160h                                                                                          | How many months ago did your household obtain the mosquito Net1?                          | Estimate the number of months ago each net was obtained. If don't know 99                                                                                            | —                      | —             | —             |
| 161h                                                                                          | Where did your household get the mosquito Net1 from?                                      | 1=Gov. hospital or health centre<br>2=Private hospital or health centre<br>3=HEW/HDA<br>5=Bought from shop/open market<br>7=Mass campaign<br>8=Other<br>9=Don't know | —                      | —             | —             |
| 162h                                                                                          | What kind of Net 1 is it?                                                                 | 1= Long-lasting net <b>SKIP TO 166</b><br>2=Factory net<br>8=Other<br>9=Don't know                                                                                   | —                      | —             | —             |
| 163h                                                                                          | When you got Net 1 was it already treated with an insecticide to kill or repel mosquitos? | 1=Yes<br>2=No<br>9=Don't know                                                                                                                                        | —                      | —             | —             |
| 164h                                                                                          | Did anyone sleep under the mosquito Net 1 last night?                                     | 1=Yes<br>2=No <b>If 2 or 9 then, SKIP TO 166</b><br>9=Don't know                                                                                                     | —                      | —             | —             |
| 165h                                                                                          | Who slept under any of the nets last night?                                               | <i>(record the Person ID from household listing)</i>                                                                                                                 | <i>Enter Person ID</i> |               |               |
|                                                                                               |                                                                                           |                                                                                                                                                                      | —                      | —             | —             |
|                                                                                               |                                                                                           |                                                                                                                                                                      | —                      | —             | —             |
|                                                                                               |                                                                                           |                                                                                                                                                                      | —                      | —             | —             |
| 159h 2                                                                                        | <i>Interviewer:</i> Is the Net 2observed?                                                 | 1=Yes<br>2=No                                                                                                                                                        | —                      | —             | —             |
| 160h 2                                                                                        | How many months ago did your household obtain the mosquito Net2                           | <i>Estimate the number of months ago each net was obtained. If don't know 99</i>                                                                                     | —                      | —             | —             |
| 161h 2                                                                                        | Where did your household get the mosquito Net2 from?                                      | 1=Gov. hospital or health centre<br>2=Private hospital or health centre<br>3=HEW/HDA<br>5=Bought from shop/open market<br>7=Mass campaign<br>8=Other<br>9=Don't know | —                      | —             | —             |
| 162 h2                                                                                        | What kind of Net 2 is it?                                                                 | 1= Long-lasting net <b>SKIP TO 166</b><br>2=Factory net<br>8=Other<br>9=Don't know                                                                                   | —                      | —             | —             |
| 163h 2                                                                                        | When you got Net 2 was it already treated with an insecticide to kill or repel mosquitos? | 1=Yes<br>2=No<br>9=Don't know                                                                                                                                        | —                      | —             | —             |
| 164h 2                                                                                        | Did anyone sleep                                                                          | 1=Yes                                                                                                                                                                | —                      | —             | —             |

|        |                                                                                           |                                                                                                                                                                      |                 |      |      |
|--------|-------------------------------------------------------------------------------------------|----------------------------------------------------------------------------------------------------------------------------------------------------------------------|-----------------|------|------|
|        | under the mosquito Net 2 last night?                                                      | 2=No <b>If 2 or 9 then, SKIP TO 166</b><br>9=Don't know                                                                                                              |                 |      |      |
| 165h 2 | Who slept under any of nets                                                               | (Record the Person ID from household listing)                                                                                                                        | Enter Person ID |      |      |
|        |                                                                                           |                                                                                                                                                                      | ____            | ____ | ____ |
|        |                                                                                           |                                                                                                                                                                      | ____            | ____ | ____ |
|        |                                                                                           |                                                                                                                                                                      | ____            | ____ | ____ |
| 159h 3 | <b>Interviewer:</b> Is the Net 3 observed                                                 | 1=Yes<br>2=No                                                                                                                                                        | —               | —    | —    |
| 160h 3 | How many months ago did your household obtain the mosquito Net3?                          | Estimate the number of months ago each net was obtained. If don't know 99                                                                                            | —               | —    | —    |
| 161h 3 | Where did your household get the mosquito Net3 from?                                      | 1=Gov. hospital or health centre<br>2=Private hospital or health centre<br>3=HEW/HDA<br>5=Bought from shop/open market<br>7=Mass campaign<br>8=Other<br>9=Don't know | —               | —    | —    |
| 162h 3 | What kind of Net 3 is it?                                                                 | 1= Long-lasting net ( <b>SKIP TO 166</b> )<br>2=Factory net<br>8=Other<br>9=Don't know                                                                               | —               | —    | —    |
| 163h 3 | When you got Net 3 was it already treated with an insecticide to kill or repel mosquitos? | 1=Yes<br>2=No<br>9=Don't know                                                                                                                                        | —               | —    | —    |
| 164h 3 | Did anyone sleep under the mosquito Net 3 last night?                                     | 1=Yes<br>2=No <b>If 2 or 9 then, SKIP TO 166</b><br>9=Don't know                                                                                                     | —               | —    | —    |
| 165h 3 | Who slept under this mosquito Net 3 last night                                            | (record the Person ID from household listing)                                                                                                                        | Enter Person ID |      |      |
|        |                                                                                           |                                                                                                                                                                      | ____            | ____ | ____ |
|        |                                                                                           |                                                                                                                                                                      | ____            | ____ | ____ |
|        |                                                                                           |                                                                                                                                                                      | ____            | ____ | ____ |

## Module 2 – Woman aged 13-49 years

| Section 2.1: Identification and consent of eligible women                                                                                                |                                                  |                                                                  |       |
|----------------------------------------------------------------------------------------------------------------------------------------------------------|--------------------------------------------------|------------------------------------------------------------------|-------|
| 166h                                                                                                                                                     | Name of women                                    |                                                                  | _____ |
| 167h                                                                                                                                                     | Woman ID                                         |                                                                  | _____ |
| 168h                                                                                                                                                     | Is it possible to interview the woman?           | 1=Yes <b>SKIP TO 170</b><br>2=No                                 | —     |
| 169h                                                                                                                                                     | If No, why Not possible to interview the woman?  | 1=Travelled away<br>2=Sick<br>3=Other<br>4=Currently Not present | —     |
| 170h                                                                                                                                                     | Interviewer: Have you read her the consent form? | 1=Yes<br>2= No                                                   | —     |
| 171h                                                                                                                                                     | Does she give her consent to be interviewed?     | 1=Yes<br>2=No <b>SKIP TO 179</b>                                 | —     |
| <i>Thank you for agreeing to participate in this interview. I would like to first ask you about your involvement in the women development army (WDA)</i> |                                                  |                                                                  |       |
| 172h                                                                                                                                                     | Do you participate in WDA?                       | 1=Yes<br>2=No <b>SKIP TO 175</b>                                 | —     |
| 173h                                                                                                                                                     | Are you a 1 to 5 WDA leader?                     | 1=Yes<br>2=No                                                    | —     |
| 174h                                                                                                                                                     | Are you a 1 to 30 WDA team leader?               | 1=Yes<br>2=No                                                    | —     |

| Section 2.2: Pregnancy history                                                                                                                                                                                                                                        |                                                                     |                                          |   |
|-----------------------------------------------------------------------------------------------------------------------------------------------------------------------------------------------------------------------------------------------------------------------|---------------------------------------------------------------------|------------------------------------------|---|
| 175h                                                                                                                                                                                                                                                                  | Are you pregnant Now?                                               | 1=Yes<br>2=No<br>8=Unsure                | — |
| 176h                                                                                                                                                                                                                                                                  | Have you ever been pregnant before?                                 | 1 = Yes<br>2 = No <b>(End Interview)</b> | — |
| 177h                                                                                                                                                                                                                                                                  | Have you ever given birth to a child?                               | 1 = Yes<br>2 = No                        | — |
| 178h                                                                                                                                                                                                                                                                  | How many children have you given birth to in total?                 | Enter number                             | — |
| <i>I understand that it is not easy to talk about children who have died, or pregnancies that did not end up not in live birth, but it is important that you tell us about all of them, so that the government can develop programs to improve children's health.</i> |                                                                     |                                          |   |
| 179h                                                                                                                                                                                                                                                                  | Have you ever had a pregnancy that's lost before full term?         | 1=Yes<br>2=No <b>SKIP TO 181</b>         | — |
| 180h                                                                                                                                                                                                                                                                  | How many pregnancies have you had that did Not end in a live birth? | Enter number                             | — |
| <i>Now would like to ask about the information regarding pregnancies beginning of 2009 (Ethiopian calendar).</i>                                                                                                                                                      |                                                                     |                                          |   |
| 181h                                                                                                                                                                                                                                                                  | Were you pregnant at the time of 2009 or any time afterwards?       | 1 = Yes<br>2 = No <b>(End interview)</b> | — |

Now I would like to record your births since 2009 (Ethiopian Calendar), whether still alive or not, starting with THE MOST RECENT ONE. *Record twins and triplets on separate lines.*

No\_of\_Preg. How many times were you pregnant at the time of 2009 or any time afterwards?

Is your younger child 2 or under 2 years of age?

| 167h<br>Woman<br>ID | 181h_a<br>Pregnancy<br>ID | 181h_b<br>Outcome of<br>pregnancy                                                                         | 181h_c<br>Baby's name                                | 181h_d<br>Date of birth/<br>Pregnancy ended                                            | 181h_e<br>Born as a<br>twin?      | 181h_f<br>Sex                      | 181h_g<br>Still alive? | 181h_h<br>If still alive, how old<br>in months?      | 181h_i<br>If the child died, when<br>did s/he die?                                    |
|---------------------|---------------------------|-----------------------------------------------------------------------------------------------------------|------------------------------------------------------|----------------------------------------------------------------------------------------|-----------------------------------|------------------------------------|------------------------|------------------------------------------------------|---------------------------------------------------------------------------------------|
|                     |                           | 1=Live birth<br>2=Baby born dead,<br><b>Skip to 181</b><br>3=Lost before full-<br>term <b>Skip to 181</b> | <i>Enter "Not<br/>given" if Not<br/>given a name</i> | <i>Enter 01 for day if<br/>Not known.<br/>Probe for months/<br/>years if Not known</i> | 1 = Yes<br>2 = No<br>3=Don't know | 1=Male<br>2=Female<br>3=Don't know | 1=Yes<br>2=No          | <i>If less than 28 days<br/>enter number of days</i> | <i>Enter 01 for day if Not<br/>known.<br/>Probe for months/years if<br/>Not known</i> |
|                     | 1                         | —                                                                                                         | —                                                    | DD/MM/ YYYY                                                                            | —                                 | —                                  | —                      | DD/MM                                                | DD/MM/ YYYY                                                                           |
|                     | 2                         | —                                                                                                         | —                                                    | DD/MM/ YYYY                                                                            | —                                 | —                                  | —                      | DD/MM                                                | DD/MM/ YYYY                                                                           |
|                     | 3                         | —                                                                                                         | —                                                    | DD/MM/ YYYY                                                                            | —                                 | —                                  | —                      | DD/MM                                                | DD/MM/ YYYY                                                                           |
|                     | 4                         | —                                                                                                         | —                                                    | DD/MM/ YYYY                                                                            | —                                 | —                                  | —                      | DD/MM                                                | DD/MM/ YYYY                                                                           |
|                     | 5                         | —                                                                                                         | —                                                    | DD/MM/ YYYY                                                                            | —                                 | —                                  | —                      | DD/MM                                                | DD/MM/ YYYY                                                                           |
|                     | 6                         | —                                                                                                         | —                                                    | DD/MM/ YYYY                                                                            | —                                 | —                                  | —                      | DD/MM                                                | DD/MM/ YYYY                                                                           |



| <b>Section 2.3: Pregnancy care for last birth (in the last two years.</b>                                        |                                                                                                                                                                    |                                                                                                 |   |
|------------------------------------------------------------------------------------------------------------------|--------------------------------------------------------------------------------------------------------------------------------------------------------------------|-------------------------------------------------------------------------------------------------|---|
| <i>Now I want to talk to you about the last birth you had that ended in [DATE], with the birth of [NAME]</i>     |                                                                                                                                                                    |                                                                                                 |   |
| 182h                                                                                                             | Do you have a family health card with information about that pregnancy and birth?                                                                                  | 1=Yes<br>2=No<br><b>SKIP TO 184</b>                                                             | — |
| 183h                                                                                                             | May I see your family health card?                                                                                                                                 | 1=Yes<br>2=No because it isn't at home<br>3=No, refused permission                              | — |
| 184h                                                                                                             | When pregnant with [NAME], did you receive any care during pregnancy? ( <i>Probe: by care I mean any care from HEW, HW, nurses, midwives or doctors, clinics</i> ) | 1=Yes<br>2=No<br><b>SKIP TO 236</b>                                                             | — |
| 185h_a                                                                                                           | Where did you go for pregnancy care?<br><b>At home</b>                                                                                                             | 1=Yes<br>2=No                                                                                   | — |
| 185h_b                                                                                                           | Where did you go for pregnancy care?<br><b>At Health Post</b>                                                                                                      | 1=Yes<br>2=No                                                                                   | — |
| 185h_c                                                                                                           | Where did you go for pregnancy care?<br><b>At Health Centre</b>                                                                                                    | 1=Yes<br>2=No                                                                                   | — |
| 185h_d                                                                                                           | Where did you go for pregnancy care?<br><b>At Hospital</b>                                                                                                         | 1=Yes<br>2=No                                                                                   | — |
| 185h_e                                                                                                           | Where did you go for pregnancy care?<br><b>Other</b>                                                                                                               | 1=Yes<br>2=No                                                                                   | — |
| <b>For women who received pregnancy care at a hospital, health center or health post</b>                         |                                                                                                                                                                    |                                                                                                 |   |
| 186h                                                                                                             | How many times did you attend the hospital for pregnancy (antenatal) care for that pregnancy?                                                                      | Enter the number of times<br>If the answer is "0" Skip to 190                                   | — |
| 188h                                                                                                             | How old was your pregnancy at the first visit?                                                                                                                     | <i>Record No. of weeks. If don't know 99. Record from FHC/ANC appointment card if available</i> | — |
| 190h                                                                                                             | How many times did you attend the health center for pregnancy (antenatal) care for that pregnancy?                                                                 | Enter the number of times<br>If the answer is "0" Skip to 194                                   | — |
| 192h                                                                                                             | How old was your pregnancy at the first visit?                                                                                                                     | <i>Record No. of weeks. If don't know 99. Record from FHC/ANC appointment card if available</i> | — |
| 194h                                                                                                             | How many times did you attend the health post for pregnancy (antenatal) care for that pregnancy?                                                                   | Enter the number of times<br>If the answer is "0" Skip to 199                                   | — |
| 196h                                                                                                             | How old was your pregnancy at the first visit?                                                                                                                     | <i>Record No. of weeks. If don't know 99. Record from FHC/ANC appointment card if available</i> | — |
| <b>For women who receive pregnancy care at home</b>                                                              |                                                                                                                                                                    |                                                                                                 |   |
| 199h                                                                                                             | How many times <u>did the HEW visit you</u> at home for pregnancy care that pregnancy?                                                                             | Enter number of times<br>If answer is "0" Skip to 201                                           | — |
| 200h                                                                                                             | How old was your pregnancy at the first HEW visit?                                                                                                                 | <i>Record No. of weeks. If don't know 99. Record from FHC/ANC appointment card if available</i> | — |
| <b>Now I want to ask you about the pregnancy care you received (Verify with family health card if available)</b> |                                                                                                                                                                    |                                                                                                 |   |
| 201h                                                                                                             | Was your weight measured?                                                                                                                                          | 1=Yes<br>2=No<br><b>SKIP TO 203</b>                                                             | — |
| 202h                                                                                                             | In which location was this service first provided?                                                                                                                 | 1=Home by HEW<br>2=Health Post<br>3=Health Centre<br>4=Hospital<br>8=Other                      | — |
| 203h                                                                                                             | Was your height measured?                                                                                                                                          | 1=Yes<br>2=No<br><b>SKIP TO 205</b>                                                             | — |
| 204h                                                                                                             | In which location was this service first provided?                                                                                                                 | 1=Home by HEW<br>2=Health Post<br>3=Health Centre                                               | — |

|      |                                                                                                                    |                                                                                             |   |
|------|--------------------------------------------------------------------------------------------------------------------|---------------------------------------------------------------------------------------------|---|
|      |                                                                                                                    | 4=Hospital<br>8=Other                                                                       |   |
| 205h | Did you receive information about breastfeeding?                                                                   | 1=Yes<br>2=No<br><b>SKIP TO 207</b>                                                         | — |
| 206h | In which location was this service first provided?                                                                 | 1=Home by WDA<br>2=Home by HEW<br>3=Health post<br>4=Health center<br>5=Hospital<br>8=Other | — |
| 207h | Was your blood pressure measured?<br>(Probe: when a strap was put around your upper arm and a measure taken).      | 1=Yes<br>2=No<br><b>SKIP TO 209</b>                                                         | — |
| 208h | In which location was this service first provided?                                                                 | 1=Home by HEW<br>2=Health post<br>3=Health center<br>4=hospital<br>8=other                  | — |
| 209h | Did you give a urine sample for a test?                                                                            | 1=Yes<br>2=No<br><b>SKIP TO 211</b>                                                         | — |
| 210h | In which location was this service provided?                                                                       | 1=Home by HEW<br>2=Health post<br>3=Health center<br>4=Hospital<br>8=other                  | — |
| 211h | Did you give blood for any test for syphilis?                                                                      | 1=Yes<br>2=No<br><b>SKIP TO 213</b>                                                         | — |
| 212h | In which location was this service provided?                                                                       | 1=Home by HEW<br>2=Health Post<br>3=Health Centre<br>4=Hospital<br>8=Other                  | — |
| 213h | Did you receive iron folate tablets or iron syrup?                                                                 | 1=Yes<br>2=No<br><b>SKIP TO 216</b>                                                         | — |
| 214h | In which location was this service provided?                                                                       | 1=Home by HEW<br>2=Health post<br>3=Health Centre<br>4=Hospital<br>8=other                  | — |
| 215h | For how many days did you take the tablets or syrup?                                                               | Enter number of days<br>Enter 999 if Not known                                              | — |
| 216h | Were you given an injection in the arm to prevent the baby from getting tetanus, that is, convulsions after birth? | 1=Yes<br>2=No<br><b>SKIP TO 222</b>                                                         | — |
| 217h | If Yes: How many times did you get a tetanus injection?                                                            | Write number of times                                                                       | — |
| 218h | If less than 2 times: <b>At any time before this pregnancy did you receive any tetanus injections?</b>             | 1=Yes<br>2=No<br><b>SKIP TO 221</b>                                                         | — |
| 221h | In which health facility was tetanus injection given?                                                              | 1=Home by HEW<br>2=Health post<br>3=Health Centre<br>4=Hospital<br>8=Other                  | — |
| 222h | Did you receive HIV information?                                                                                   | 1=Yes<br>2=No<br><b>SKIP TO 224</b>                                                         | — |

|                                                                                      |                                                                                                                                                          |                                                                                             |   |
|--------------------------------------------------------------------------------------|----------------------------------------------------------------------------------------------------------------------------------------------------------|---------------------------------------------------------------------------------------------|---|
| 223h                                                                                 | In which location was this service first provided?                                                                                                       | 1=Home by WDA<br>2=Home by HEW<br>3=Health post<br>4=Health Centre<br>5=Hospital<br>8=other | — |
| 224h                                                                                 | Did you receive STI testing?                                                                                                                             | 1=Yes<br>2=No <b>SKIP TO 226</b>                                                            | — |
| 225h                                                                                 | In which location was this service provided?                                                                                                             | 1=Health Centre<br>2=Hospital<br>8=Other                                                    | — |
| 226h                                                                                 | Did you receive any STI treatment?                                                                                                                       | 1=Yes<br>2=No <b>SKIP TO 228</b>                                                            | — |
| 227h                                                                                 | In which location was this service provided?                                                                                                             | 1=Health center<br>2=Hospital<br>8=Other                                                    | — |
| 228h                                                                                 | Did you receive information on nutrition?                                                                                                                | 1=Yes<br>2=No <b>SKIP TO 230</b>                                                            | — |
| 229h                                                                                 | In which location was this service first provided?                                                                                                       | 1=Home by WDA<br>2=Home by HEW<br>3=Health post<br>4=Health Centre<br>5=Hospital<br>8=Other | — |
| 230h                                                                                 | Did you receive information on pregnancy danger signs?                                                                                                   | 1=Yes<br>2=No <b>SKIP TO 232</b>                                                            | — |
| 231h                                                                                 | In which location was this service first provided?                                                                                                       | 1=Home by WDA<br>2=Home by HEW<br>3=Health post<br>4=Health Centre<br>5=Hospital<br>8=Other | — |
| 232h                                                                                 | Were you advised on birth preparedness and complication readiness? <i>Probe: for finances, for help during delivery, for transport, for emergencies?</i> | 1=Yes<br>2=No <b>SKIP TO 236</b>                                                            | — |
| 233h                                                                                 | In which location was this service first provided?                                                                                                       | 1=Home by WDA<br>2=Home by HEW<br>3=Health post<br>4=Health Centre<br>5=Hospital<br>8=Other | — |
| 234h                                                                                 | <b>Was your birth preparedness and complication readiness plan recorded?</b>                                                                             | 1=Yes<br>2=No <b>SKIP TO 236</b>                                                            | — |
| 235h                                                                                 | <b>In which location was this service provided?</b>                                                                                                      | 1=Home by WDA<br>2=Home by HEW<br>3=Health post<br>4=Health Centre<br>5=Hospital<br>8=Other | — |
| <b>Do Not read out list, prompt, 'anything else' record 1=Yes for all that apply</b> |                                                                                                                                                          |                                                                                             |   |
| 236h                                                                                 | Can you tell me what are problems in pregnancy might need medical treatment? <b>Severe headache</b>                                                      | 1=Yes<br>2= No                                                                              | — |
| 237h                                                                                 | Can you tell me what are problems in pregnancy might need                                                                                                | 1=Yes                                                                                       | — |

|                                                                                      |                                                                                                                                                           |                                                                                        |   |
|--------------------------------------------------------------------------------------|-----------------------------------------------------------------------------------------------------------------------------------------------------------|----------------------------------------------------------------------------------------|---|
|                                                                                      | medical treatment? <b>Blurry vision</b>                                                                                                                   | 2= No                                                                                  |   |
| 238h                                                                                 | Can you tell me what are problems in pregnancy might need medical treatment?<br><b>Reduced or absent fetal movement</b>                                   | 1=Yes<br>2= No                                                                         | — |
| 239h                                                                                 | Can you tell me what are problems in pregnancy might need medical treatment? <b>High blood pressure</b>                                                   | 1=Yes<br>2= No                                                                         | — |
| 240h                                                                                 | Can you tell me what are problems in pregnancy might need medical treatment?<br><b>Edema of the face/hands (i.e. swelling)</b>                            | 1=Yes<br>2= No                                                                         | — |
| 241h                                                                                 | Can you tell me what are problems in pregnancy might need medical treatment? <b>Convulsions</b>                                                           | 1=Yes<br>2= No                                                                         | — |
| 242h                                                                                 | Can you tell me what are problems in pregnancy might need medical treatment?<br><b>Excessive vaginal bleeding</b>                                         | 1=Yes<br>2= No                                                                         | — |
| 243h                                                                                 | Can you tell me what are problems in pregnancy might need medical treatment?<br><b>Severe lower abdominal pain</b>                                        | 1=Yes<br>2= No                                                                         | — |
| 244h                                                                                 | Can you tell me what are problems in pregnancy might need medical treatment? <b>Fever</b>                                                                 | 1=Yes<br>2= No                                                                         | — |
| 245h                                                                                 | Can you tell me what are problems in pregnancy might need medical treatment? <b>Anemia</b>                                                                | 1=Yes<br>2= No                                                                         | — |
| 246h                                                                                 | Can you tell me what are problems in pregnancy might need medical treatment? <b>Other</b>                                                                 | Specify                                                                                | — |
|                                                                                      |                                                                                                                                                           |                                                                                        |   |
| 247h                                                                                 | Were you told where to go if you had any complications?                                                                                                   | 1=Yes<br>2= No<br><b>SKIP TO 249</b>                                                   | — |
| 248h                                                                                 | If Yes, where were you told to go?                                                                                                                        | 1= Health post<br>2= Health Centre<br>3= Hospital<br>8=Other (specify)<br>9=Don't know | — |
| 249h                                                                                 | During your last pregnancy did you make any preparations for your delivery? <i>Probe: for finances, for help during delivery, transport, emergencies?</i> | 1=Yes<br>2= No<br><b>SKIP TO 260</b>                                                   | — |
| <b>Do Not read out list, prompt, 'anything else' record 1=Yes for all that apply</b> |                                                                                                                                                           |                                                                                        |   |
| 250h                                                                                 | What preparations did you make for the delivery?<br><b>Financial</b>                                                                                      | 1=Yes<br>2= No                                                                         | — |
| 251h                                                                                 | What preparations did you make for the delivery?<br><b>Transport</b>                                                                                      | 1=Yes<br>2= No                                                                         | — |
| 252h                                                                                 | What preparations did you make for the delivery?<br><b>Food</b>                                                                                           | 1=Yes<br>2= No                                                                         | — |
| 253h                                                                                 | What preparations did you make for the delivery?<br><b>Identification of birth attendant</b>                                                              | 1=Yes<br>2= No                                                                         | — |
| 254h                                                                                 | What preparations did you make for the delivery?<br><b>Identification of facility</b>                                                                     | 1=Yes<br>2= No                                                                         | — |
| 255h                                                                                 | What preparations did you make for the delivery?<br><b>Clean clothes</b>                                                                                  | 1=Yes<br>2= No                                                                         | — |
| 256h                                                                                 | What preparations did you make for the delivery?                                                                                                          | 1=Yes<br>2= No                                                                         | — |

|      |                                                                         |                |   |
|------|-------------------------------------------------------------------------|----------------|---|
|      | <b>Cover to deliver on</b>                                              |                |   |
| 257h | What preparations did you make for the delivery?<br><b>Gloves</b>       | 1=Yes<br>2= No | — |
| 258h | What preparations did you make for the delivery?<br><b>Cotton gauze</b> | 1=Yes<br>2= No | — |
| 259h | What preparations did you make for the delivery?<br><b>Other</b>        | Specify        | — |

| <b>Section 2.4 Delivery for last birth</b> |                                                                                                                                                                                            |                                                                                                                                                  |   |
|--------------------------------------------|--------------------------------------------------------------------------------------------------------------------------------------------------------------------------------------------|--------------------------------------------------------------------------------------------------------------------------------------------------|---|
| 260h                                       | Who assisted with the delivery?                                                                                                                                                            | 1=Doctor<br>2=Nurse/Midwife<br>3=Health Extension Worker<br>4=Traditional Birth Attendant<br>5=Relative/friend<br>6=No-one<br>8= Other (specify) | — |
| 261h                                       | When you gave birth, did the person assisting you wear gloves during delivery?                                                                                                             | 1=Yes<br>2= No<br>9=Don't know                                                                                                                   | — |
| 262h                                       | When you gave birth, did the person assisting you wash her hands before the delivery?                                                                                                      | 1=Yes<br>2= No<br>9=Don't know                                                                                                                   | — |
| 263h                                       | Where did you give birth?                                                                                                                                                                  | 1=Home<br>2=Health post<br>3=Health Centre<br>4=Hospital<br>8=Other                                                                              | — |
| 264h                                       | If health post/health centre/hospital: After giving birth, for how many days did you stay at the health post/health Centre/hospital in total?                                              | Enter number of days, enter 0 if she left on the same day as delivery                                                                            | — |
| 265h                                       | Was [NAME] delivered by caesarean, that is, did they cut your belly open to take the baby out?                                                                                             | 1=Yes<br>2= No                                                                                                                                   | — |
| <b>Read out the list</b>                   |                                                                                                                                                                                            |                                                                                                                                                  |   |
| 266h                                       | During the delivery of [NAME] did you experience any of the following? <b>Heavy bleeding</b>                                                                                               | 1=Yes<br>2= No                                                                                                                                   | — |
| 267h                                       | During the delivery of [NAME] did you experience any of the following? <b>Labour more than 12 hours</b>                                                                                    | 1=Yes<br>2= No                                                                                                                                   | — |
| 268h                                       | During the delivery of [NAME] did you experience any of the following? <b>Loss of consciousness</b>                                                                                        | 1=Yes<br>2= No                                                                                                                                   | — |
| 269h                                       | During the delivery of [NAME] did you experience any of the following? <b>Premature labour</b>                                                                                             | 1=Yes<br>2= No                                                                                                                                   | — |
| 270h                                       | During the delivery of [NAME] did you experience any of the following? <b>Foul discharge</b>                                                                                               | 1=Yes<br>2= No                                                                                                                                   | — |
| 271h                                       | During the delivery of [NAME] did you experience any of the following? <b>Baby in abnormal position</b>                                                                                    | 1=Yes<br>2= No                                                                                                                                   | — |
| 272h                                       | During delivery were you advised to go to a different facility for specialist care (if home birth to a health post/health center/hospital, if health post/facility to a hospital/different | 1=Yes<br>2= No                                                                                                                                   | — |

|                                                                                      |                                                                                                                          |                                                                                                                                                                                    |   |
|--------------------------------------------------------------------------------------|--------------------------------------------------------------------------------------------------------------------------|------------------------------------------------------------------------------------------------------------------------------------------------------------------------------------|---|
|                                                                                      | facility)?                                                                                                               |                                                                                                                                                                                    |   |
| 273h                                                                                 | If Yes: Did you go to that different facility to get the specialist care (referral)?                                     | 1=Yes<br>2= No<br><b>SKIP TO 275</b>                                                                                                                                               | — |
| 274h                                                                                 | If Yes: What transport did you take to get there?                                                                        | 1=Own transport<br>2=Public transport<br>3=Hired transport<br>4=District/ambulance<br>5=Traditional ambulance (Qareza/cart)<br>6=Motor Bike/Bajaj<br>7=Walked<br>8=Other (specify) | — |
| 275h                                                                                 | Did anyone check on your health after the delivery?                                                                      | 1=Yes<br>2= No<br><b>SKIP TO 288</b>                                                                                                                                               | — |
| 276h                                                                                 | How many times did anyone check on your health in the first month after delivery?                                        | Write number. If don't know 99.                                                                                                                                                    | — |
| 277h                                                                                 | How long after delivery did the first check take place?                                                                  | Record number of days if same day as delivery enter 0. If don't know 99.                                                                                                           | — |
| 278h                                                                                 | Who checked on your health for the first time after you gave birth to [NAME]? ( <i>Probe for most qualified person</i> ) | 1=Doctor/Health Officer<br>2=Nurse/Midwife/Health Officer<br>3=Health Extension Worker<br>4=Traditional birth attendant<br>8=Other (specify)                                       | — |
| 279h                                                                                 | Where did this check take place?                                                                                         | 1=Home<br>2=Health post<br>3=Health center<br>4=Hospital<br>8=Other (specify)                                                                                                      | — |
| 280h                                                                                 | <i>If her health was checked at least twice (see Q above): How long after delivery did the second check take place?</i>  | Record number of days. If don't know 99.                                                                                                                                           | — |
| <i>Do Not read out list, prompt, 'anything else' record 1=Yes for all that apply</i> |                                                                                                                          |                                                                                                                                                                                    |   |
| 281h                                                                                 | During any of the health checks what was done to check on your health? <b>Examined body</b>                              | 1=Yes<br>2= No                                                                                                                                                                     | — |
| 282h                                                                                 | During any of the health checks what was done to check on your health? <b>Checked breasts</b>                            | 1=Yes<br>2= No                                                                                                                                                                     | — |
| 283h                                                                                 | During any of the health checks what was done to check on your health? <b>Checked for heavy bleeding</b>                 | 1=Yes<br>2= No                                                                                                                                                                     | — |
| 284h                                                                                 | During any of the health checks what was done to check on your health? <b>Counselled on danger signs</b>                 | 1=Yes<br>2= No                                                                                                                                                                     | — |
| 285h                                                                                 | During any of the health checks what was done to check on your health? <b>Counselled on family planning</b>              | 1=Yes<br>2= No                                                                                                                                                                     | — |
| 286h                                                                                 | During any of the health checks what was done to check on your health? <b>Counselled on nutrition</b>                    | 1=Yes<br>2= No                                                                                                                                                                     | — |
| 287h                                                                                 | During any of the health checks what was done to check on your health? <b>Referred to a health facility</b>              | 1=Yes<br>2= No                                                                                                                                                                     | — |
| 287h_n                                                                               | During any of the health checks what was done to check on your health? <b>None from the list</b>                         | 1=Yes<br>2= No                                                                                                                                                                     | — |

| <b>Section 2.5: Newborn Care</b>                                                                   |                                                                                                              |                                                                                                                                           |   |
|----------------------------------------------------------------------------------------------------|--------------------------------------------------------------------------------------------------------------|-------------------------------------------------------------------------------------------------------------------------------------------|---|
| <i>Now I have some questions about what happened to [NAME] at the birth and immediately after.</i> |                                                                                                              |                                                                                                                                           |   |
| 288h                                                                                               | Can I see a card recording information about the birth? (use the card to verify all information if possible) | 1=Yes<br>2=No                                                                                                                             | — |
| 289h                                                                                               | Was [NAME] weighed at birth?                                                                                 | 1=Yes<br>2=No <b>SKIP TO 291</b>                                                                                                          | — |
| 290h                                                                                               | If Yes, how much did [NAME] weigh at birth? (use the weight recorded on the card if possible)                | Weight in grams e.g. if the weight was 1.9 kilograms enter 1900, If don't know 9999.                                                      | — |
| 291h                                                                                               | Did [NAME] have any difficulty breathing/crying at birth?                                                    | 1=Yes<br>2=No <b>SKIP TO 293</b>                                                                                                          | — |
| 292h_a                                                                                             | Did anyone do <b>Rubbing</b> to [NAME] immediately after birth?                                              | 1= Yes<br>2= No<br>9 = Don't know                                                                                                         | — |
| 292h_b                                                                                             | Did anyone do <b>Stimulating</b> to [NAME] immediately after birth?                                          | 1= Yes<br>2= No<br>9 = Don't know                                                                                                         | — |
| 292h_c                                                                                             | Did anyone do <b>Mouth-to-mouth</b> to [NAME] immediately after birth?                                       | 1= Yes<br>2= No<br>9= Don't know                                                                                                          | — |
| 292h_d                                                                                             | Did anyone do <b>Resuscitation</b> to [NAME] immediately after birth?                                        | 1= Yes<br>2= No<br>99 = Don't know                                                                                                        | — |
| 292h_e                                                                                             | Did anyone do <b>None of these</b> to [NAME] immediately at birth?                                           | 1= Yes<br>2= No<br>9= Don't know                                                                                                          | — |
| 293h                                                                                               | Where was [NAME] placed immediately after delivery?                                                          | 1=Alone/on the floor<br>2=On the mother's belly/chest<br>3=Beside the mother<br>4=With someone else<br>8=Other (specify)<br>9= Don't know | — |
| 294h                                                                                               | When [NAME] was born, was she/he dried/wiped?                                                                | 1=Yes<br>2=No <b>If 2 or 9 Skip to 296</b><br>9=Don't know                                                                                | — |
| 295h                                                                                               | How long after [NAME] was born was she/he dried/wiped?                                                       | Enter in minutes, check for time after the baby was born (Not time after the placenta came out). If don't know 99                         | — |
| 296h                                                                                               | When [NAME] was born, was she/he wrapped with a cloth?                                                       | 1=Yes<br>2= No <b>If 2 or 9 SKIP TO 298</b><br>9=Don't know                                                                               | — |
| 297h                                                                                               | How long after [NAME] was born was she/he wrapped with a cloth?                                              | Enter in minutes, check for time after the baby was born (Not time after the placenta came out). If don't know 99                         | — |
| 298h                                                                                               | What was used to tie the cord?                                                                               | 1=New string/thread<br>2=Boiled string/thread<br>3=Any string/thread<br>4=Nothing<br>8=Other (specify)<br>9=Don't know                    | — |
| 299h                                                                                               | What was used to cut the cord?                                                                               | 1=New razor blade<br>2=Any razor blade<br>3=Scissors<br>8=Other (specify)<br>9=Don't know                                                 | — |
| 300h                                                                                               | Was anything applied to the cord after cutting and tying?                                                    | 1=Yes<br>2= No <b>SKIP TO 308</b>                                                                                                         | — |

|                                                                                      |                                                                                                                                  | 9=Don't know <b>SKIP TO 308</b>                                                                                                                   |   |
|--------------------------------------------------------------------------------------|----------------------------------------------------------------------------------------------------------------------------------|---------------------------------------------------------------------------------------------------------------------------------------------------|---|
| <i>Do Not read out list, prompt, 'anything else' record 1=Yes for all that apply</i> |                                                                                                                                  |                                                                                                                                                   |   |
| 301h                                                                                 | What was applied to the cord just after cutting the cord? <b>Butter</b>                                                          | 1= Yes<br>2= No                                                                                                                                   | — |
| 302h                                                                                 | What was applied to the cord just after cutting the cord? <b>Ash</b>                                                             | 1= Yes<br>2= No                                                                                                                                   | — |
| 303h                                                                                 | What was applied to the cord just after cutting the cord? <b>Ointment</b>                                                        | 1= Yes<br>2= No                                                                                                                                   | — |
| 304h                                                                                 | What was applied to the cord just after cutting the cord? <b>Animal dung</b>                                                     | 1= Yes<br>2= No                                                                                                                                   | — |
| 305h                                                                                 | What was applied to the cord just after cutting the cord? <b>Oil</b>                                                             | 2= No<br>1= Yes                                                                                                                                   | — |
| 306h                                                                                 | What was applied to the cord just after cutting the cord? <b>Cold water</b>                                                      | 1= Yes<br>2= No                                                                                                                                   | — |
| 307h                                                                                 | What was applied to the cord just after cutting the cord? <b>Other</b>                                                           | Specify _____                                                                                                                                     | — |
| 308h                                                                                 | When [NAME] was born, how soon was [NAME] bathed?                                                                                | 1=In the first hour<br>2=After one-hour <b>SKIP TO 310</b><br>3=After one day <b>SKIP TO 311</b>                                                  | — |
| 309h                                                                                 | If in the first hour: After how many minutes would you say?                                                                      | Write number of minutes.<br><b>SKIP TO 310</b>                                                                                                    | — |
| 310h                                                                                 | If after one hour: After how many hours would you say?                                                                           | <i>Write number of hours. If response is 'after one hour' enter 1. If response is 'after one and a half hours' enter 1.</i><br><b>SKIP TO 312</b> | — |
| 311h                                                                                 | If after one day: After how many days would you say?                                                                             | <i>Write number of days. If response is 'after one day' enter 1. If response is 'after one and a half days' enter 1.</i>                          | — |
| 312h                                                                                 | In the first week of life, did you hold [NAME] skin to skin against your breasts during the daytime and night time?              | 1=Yes always<br>2=Yes very often<br>3=Yes sometime<br>4=Never<br>9=Don't know                                                                     | — |
| 313h                                                                                 | In the first week of life, did you sleep with [NAME] against you at night, or did you lay him/her alone on the bed or elsewhere? | 1=Slept with mother<br>2=Baby slept alone<br>3=Baby slept with another person                                                                     | — |
| 314h                                                                                 | Did you ever breastfeed [NAME]?                                                                                                  | 1=Yes<br>2= No <b>SKIP TO 319</b>                                                                                                                 | — |
| 315h                                                                                 | How long after birth did you first put [NAME] to the breast?                                                                     | 1=In the first hour<br>2=After one-hour <b>SKIP TO 317</b><br>3=After one day <b>SKIP TO 318</b>                                                  | — |
| 316h                                                                                 | If in the first hour: After how many minutes would you say?                                                                      | Write number of minutes.<br><b>SKIP TO 319</b>                                                                                                    | — |
| 317h                                                                                 | If after one hour: After how many hours would you say?                                                                           | <i>Write number of hours. If response is 'after one hour' enter 1. If response is 'after one and a half hours' enter 1.</i><br><b>SKIP TO 319</b> | — |
| 318h                                                                                 | How soon after the baby born did you bath him/ her?                                                                              | <i>Write number of days. If response is 'after one day' enter 1. If response is 'after one and a half days' enter 1.</i>                          | — |
| 319h                                                                                 | Did [NAME] receive vitamin K injection after delivery?                                                                           | 1 = Yes<br>2 = No<br>9= Don't know                                                                                                                | — |



|                                                                     |                                                                                                                                                                                                                          |                                                                                                                               |   |
|---------------------------------------------------------------------|--------------------------------------------------------------------------------------------------------------------------------------------------------------------------------------------------------------------------|-------------------------------------------------------------------------------------------------------------------------------|---|
| 320h                                                                | Did [NAME] receive TTC eye ointment after delivery?                                                                                                                                                                      | 1 = Yes<br>2 = No<br>9= Don't know                                                                                            | — |
| 321h                                                                | Did [NAME] receive oral polio vaccine-after delivery?                                                                                                                                                                    | 1 = Yes<br>2 = No<br>9= Don't know                                                                                            | — |
| 322h                                                                | Did you squeeze out and throw away the first milk?                                                                                                                                                                       | 1=Yes<br>2= No                                                                                                                | — |
| 323h                                                                | In the first three days after delivery, was [NAME] given anything to drink other than breast milk?                                                                                                                       | 1=Yes<br>2= No                                                                                                                | — |
| <i>Now about care for [name] in the first month of his/her life</i> |                                                                                                                                                                                                                          |                                                                                                                               |   |
| 324h                                                                | In the month after [NAME] was born, did any health care provider or a traditional birth attendant check on his/her health? <i>Probe for checks done at the place of birth on the same day as birth, and checks after</i> | 1=Yes<br>2= No <b>SKIP TO 340</b>                                                                                             | — |
| 325h                                                                | If Yes: In the month after [NAME] was born, how many times did a health care provider or a traditional birth attendant check on his/her health?                                                                          | Write number of times.                                                                                                        | — |
| 326h                                                                | If Yes: How long after delivery did the first check take place?                                                                                                                                                          | <i>Record number of days if same day as delivery enter 0</i>                                                                  | — |
| 327h                                                                | If more than one time: How long after delivery did the second check take place?                                                                                                                                          | <i>Record number of days</i>                                                                                                  | — |
| 328h                                                                | Who checked on [NAME] health the first time? (Probe for most qualified person)                                                                                                                                           | 1=Doctor/Health Officer<br>2=Nurse/Midwife<br>3=Health Extension Worker<br>4=Traditional birth attendant<br>8=Other (specify) | — |
| 329h                                                                | Where did the first check on [NAME] take place?                                                                                                                                                                          | 1=Home<br>2=Health post<br>3=Health centre<br>4=Hospital<br>8=Other (specify)                                                 | — |
| 330h                                                                | At any of the health checks in the first month, what was done to check the health of baby?<br><b>Generally examined/ looked at baby's body</b>                                                                           | 1=Yes<br>2= No                                                                                                                | — |
| 331h                                                                | At any of the health checks in the first month, what was done to check the health of baby?<br><b>Weighed baby</b>                                                                                                        | 1=Yes<br>2= No                                                                                                                | — |
| 332h                                                                | At any of the health checks in the first month, what was done to check the health of baby?<br><b>Checked cord</b>                                                                                                        | 1=Yes<br>2= No                                                                                                                | — |
| 333h                                                                | At any of the health checks in the first month, what was done to check the health of baby?<br><b>Counselled on breastfeeding</b>                                                                                         | 1=Yes<br>2= No                                                                                                                | — |
| 334h                                                                | At any of the health checks in the first month, what was done to check the health of baby?<br><b>Observed breastfeeding</b>                                                                                              | 1=Yes<br>2= No                                                                                                                | — |
| 335h                                                                | At any of the health checks in the first month, what was done to check the health of baby?<br><b>Counselled on skin-to-skin contact/warmth</b>                                                                           | 1=Yes<br>2= No                                                                                                                | — |
| 336h                                                                | At any of the health checks in the first month, what was done to check the health of baby?                                                                                                                               | 1=Yes<br>2= No                                                                                                                | — |

|                                                                                                               |                                                                                                                                    |                                                                                                |   |
|---------------------------------------------------------------------------------------------------------------|------------------------------------------------------------------------------------------------------------------------------------|------------------------------------------------------------------------------------------------|---|
|                                                                                                               | <b>Checked baby for danger signs</b>                                                                                               |                                                                                                |   |
| 337h                                                                                                          | At any of the health checks in the first month, what was done to check the health of baby?<br><b>Counselled on danger signs</b>    | 1=Yes<br>2= No                                                                                 | — |
| 338h                                                                                                          | At any of the health checks in the first month, what was done to check the health of baby?<br><b>Referred to a health facility</b> | 1=Yes<br>2= No                                                                                 | — |
| 339h                                                                                                          | At any of the health checks in the first month, what was done to check the health of baby?<br><b>Nothing</b>                       | 1=Yes<br>2= No                                                                                 | — |
| <i>Now I want to talk to you about any sickness your child experienced in the <b>first month of life.</b></i> |                                                                                                                                    |                                                                                                |   |
| 341h                                                                                                          | Was [NAME] sick in the first month?                                                                                                | 1=Yes<br>2= No <b>SKIP TO 396</b>                                                              | — |
| 342h                                                                                                          | Can I just check, did [NAME] have any of the following symptoms? <b>Stopped feeding well</b>                                       | 1=Yes<br>2= No                                                                                 | — |
| 343h                                                                                                          | Can I just check, did [NAME] have any of the following symptoms?<br><b>Difficult or fast breathing</b>                             | 1=Yes<br>2= No                                                                                 | — |
| 344h                                                                                                          | Can I just check, did [NAME] have any of the following symptoms? <b>Chest in-drawing</b>                                           | 1=Yes<br>2= No                                                                                 | — |
| 345h                                                                                                          | Can I just check, did [NAME] have any of the following symptoms? <b>Unusually hot or cold</b>                                      | 1=Yes<br>2= No                                                                                 | — |
| 346h                                                                                                          | Can I just check, did [NAME] have any of the following symptoms?<br><b>Baby less active than usual</b>                             | 1=Yes<br>2= No                                                                                 | — |
| 347h                                                                                                          | Can I just check, did [NAME] have any of the following symptoms? <b>Body became yellow</b>                                         | 1=Yes<br>2= No                                                                                 | — |
| 348h                                                                                                          | Can I just check, did [NAME] have any of the following symptoms? <b>Other</b>                                                      | <b>Specify</b>                                                                                 | — |
| 349h                                                                                                          | If any sickness/symptom reported: How old was [NAME] when sick for the first time?                                                 | <i>Record number of days of age when [NAME] was first sick if on first day of life enter 0</i> | — |
| <b>Check all the following symptoms: (Read all)</b>                                                           |                                                                                                                                    |                                                                                                |   |
| 350h                                                                                                          | When [NAME] was sick that first time what was the problem? <b>Fever</b>                                                            | 1=Yes<br>2= No                                                                                 | — |
| 351h                                                                                                          | When [NAME] was sick that first time what was the problem? <b>Unable to suckle/feed</b>                                            | 1=Yes<br>2= No                                                                                 | — |
| 352h                                                                                                          | When [NAME] was sick that first time what was the problem? <b>Difficult/fast breathing</b>                                         | 1=Yes<br>2= No                                                                                 | — |
| 353h                                                                                                          | When [NAME] was sick that first time what was the problem? <b>Severe chest in-drawing</b>                                          | 1=Yes<br>2= No                                                                                 | — |
| 354h                                                                                                          | When [NAME] was sick that first time what was the problem? <b>Diarrhea</b>                                                         | 1=Yes<br>2= No                                                                                 | — |
| 355h                                                                                                          | When [NAME] was sick that first time what was the problem? <b>Convulsions</b>                                                      | 1=Yes<br>2= No                                                                                 | — |
| 356h                                                                                                          | When [NAME] was sick that first time what was the problem? <b>Persistent vomiting</b>                                              | 1=Yes<br>2= No                                                                                 | — |
| 357h                                                                                                          | When [NAME] was sick that first time what was the problem? <b>Yellow palms/soles/eyes</b>                                          | 1=Yes<br>2= No                                                                                 | — |

|                                                                                                                                                                    |                                                                                                                                                                    |                                   |       |
|--------------------------------------------------------------------------------------------------------------------------------------------------------------------|--------------------------------------------------------------------------------------------------------------------------------------------------------------------|-----------------------------------|-------|
| 358h                                                                                                                                                               | When [NAME] was sick that first time what was the problem? <b>Lethargy</b>                                                                                         | 1=Yes<br>2= No                    | —     |
| 359h                                                                                                                                                               | When [NAME] was sick that first time what was the problem? <b>Unconscious</b>                                                                                      | 1=Yes<br>2= No                    | —     |
| 360h                                                                                                                                                               | When [NAME] was sick that first time what was the problem? <b>Red/discharge eyes</b>                                                                               | 1=Yes<br>2=No                     | —     |
| 361h                                                                                                                                                               | When [NAME] was sick that first time what was the problem? <b>Skin pustules</b>                                                                                    | 1=Yes<br>2=No                     | —     |
| 362h                                                                                                                                                               | When [NAME] was sick that first time what was the problem? <b>Skin around cord was red</b>                                                                         | 1=Yes<br>2=No                     | —     |
| 363h                                                                                                                                                               | When [NAME] was sick that first time what was the problem? <b>Pus from cord</b>                                                                                    | 1=Yes<br>2=No                     | —     |
| 364h                                                                                                                                                               | When [NAME] was sick that first time what was the problem? <b>Other</b>                                                                                            | Specify                           | _____ |
| <i>Select all that apply for the time before the baby was taken for extra care (do Not read out list, prompt, 'anything else' record 1=Yes for all that apply)</i> |                                                                                                                                                                    |                                   |       |
| 365h                                                                                                                                                               | How was [NAME] treated for this illness at home? <b>Giving drugs</b>                                                                                               | 1=Yes<br>2=No                     | —     |
| 366h                                                                                                                                                               | How was [NAME] treated for this illness at home? <b>Giving herbs</b>                                                                                               | 1=Yes<br>2=No                     | —     |
| 367h                                                                                                                                                               | How was [NAME] treated for this illness at home? <b>Contacting a provider for advice</b>                                                                           | 1=Yes<br>2=No                     | —     |
| 368h                                                                                                                                                               | How was [NAME] treated for this illness at home? <b>Contacting someone else for advice</b>                                                                         | 1=Yes<br>2=No                     | —     |
| 369h                                                                                                                                                               | How was [NAME] treated for this illness at home? <b>No treatment given at home</b>                                                                                 | 1=Yes<br>2=No                     | —     |
| 370h                                                                                                                                                               | How was [NAME] treated for this illness at home? <b>Don't remember</b>                                                                                             | 1=Yes<br>2=No                     | —     |
| 371h                                                                                                                                                               | Did you seek care for [NAME] outside the home at that time?                                                                                                        | 1=Yes <b>SKIP TO 373</b><br>2= No | —     |
| 372h_a                                                                                                                                                             | If No care sought at that time: Why didn't you seek care for [NAME] outside the home during that first illness?<br><b>Expected him/her to get better</b>           | 1=Yes<br>2=No                     | —     |
| 372h_b                                                                                                                                                             | If No care sought at that time: Why didn't you seek care for [NAME] outside the home during that first illness? <b>Health facility too far</b>                     | 1=Yes<br>2=No                     | —     |
| 372h_c                                                                                                                                                             | If No care sought at that time: Why didn't you seek care for [NAME] outside the home during that first illness?<br><b>Cost of treatment too expensive</b>          | 1=Yes<br>2=No                     | —     |
| 372h_d                                                                                                                                                             | If No care sought at that time: Why didn't you seek care for [NAME] outside the home during that first illness? <b>Don't trust the facility</b>                    | 1=Yes<br>2=No                     | —     |
| 372h_e                                                                                                                                                             | If No care sought at that time: Why didn't you seek care for [NAME] outside the home during that first illness? <b>Family member didn't allow</b>                  | 1=Yes<br>2=No                     | —     |
| 372h_f                                                                                                                                                             | If No care sought at that time: Why didn't you seek care for [NAME] outside the home during that first illness?<br><b>Community advisor/TBA advised against it</b> | 1=Yes<br>2=No                     | —     |
| 372h_g                                                                                                                                                             | If No care sought at that time: Why didn't you seek care for [NAME] outside the home during that first illness? <b>Other</b>                                       | Specify                           | —     |

|                                                                                                             |                                                                                                                     |                                                                                                                                |       |
|-------------------------------------------------------------------------------------------------------------|---------------------------------------------------------------------------------------------------------------------|--------------------------------------------------------------------------------------------------------------------------------|-------|
| 373h                                                                                                        | If sought care: How many times did you seek care for that illness?                                                  | Write number of times                                                                                                          | —     |
| 374h                                                                                                        | Where outside the home did you seek care from the first time?                                                       | 1=Health post<br>2=Health centre<br>3=Hospital<br>4=Pharmacy/shop<br>8=Other (specify)                                         | —     |
| 375h                                                                                                        | Do you have any medical record from when you went for health care outside the home the first time?                  | 1=Yes<br>2= No <b>SKIP TO 377</b>                                                                                              | —     |
| 376h                                                                                                        | If Yes, can I see it?                                                                                               | 1=Yes<br>2= No                                                                                                                 | —     |
| 377h                                                                                                        | After how many days did you seek care the first time?                                                               | Write number of days from the onset of illness, if first day of illness write 0. If possible use the medical record to confirm | —     |
| 378h                                                                                                        | If Yes to any of the symptoms (342-348): At any time during the illness, did [NAME] take any drugs for the illness? | If the information is available from the card use it<br>1=Yes<br>2= No <b>(END OF MODULE)</b>                                  | —     |
| <i>Select all mentioned (do Not read out list, prompt, 'anything else' record 1=Yes for all that apply)</i> |                                                                                                                     |                                                                                                                                |       |
| 379h                                                                                                        | What drugs did [NAME] take?<br><b>Antimalarial tablet</b>                                                           | 1=Yes<br>2= No                                                                                                                 | —     |
| 382h                                                                                                        | What drugs did [NAME] take?<br><b>Antibiotic: Gentamicin injection</b>                                              | 1=Yes<br>2= No                                                                                                                 | —     |
| 383h                                                                                                        | What drugs did [NAME] take?<br><b>Antibiotic: Amoxicillin syrup or tablet</b>                                       | 1=Yes<br>2= No                                                                                                                 | —     |
| 384h                                                                                                        | What drugs did [NAME] take?<br><b>Antibiotic: Cotrimoxazole syrup</b>                                               | 1=Yes<br>2= No                                                                                                                 | —     |
| 385h                                                                                                        | What drugs did [NAME] take?<br><b>Antibiotic: Other /Not known</b>                                                  | 1=Yes<br>2= No                                                                                                                 | —     |
| 386h                                                                                                        | What drugs did [NAME] take?<br><b>Tetracycline eye ointment</b>                                                     | 1=Yes<br>2= No                                                                                                                 | —     |
| 387h                                                                                                        | What drugs did [NAME] take? <b>Zinc</b>                                                                             | 1=Yes<br>2= No                                                                                                                 | —     |
| 388h                                                                                                        | What drugs did [NAME] take? <b>ORS</b>                                                                              | 1=Yes<br>2= No                                                                                                                 | —     |
| 389h                                                                                                        | What drugs did [NAME] take?<br><b>Combined Zinc-ORS</b>                                                             | 1=Yes<br>2= No                                                                                                                 | —     |
| 390h                                                                                                        | What drugs did [NAME] take? <b>Vitamin A</b>                                                                        | 1=Yes<br>2= No                                                                                                                 | —     |
| 391h                                                                                                        | What drugs did [NAME] take? <b>Paracetamol</b>                                                                      | 1=Yes<br>2= No                                                                                                                 | —     |
| 392h                                                                                                        | What drugs did [NAME] take?<br><b>Traditional remedies herbs/local remedy</b>                                       | 1=Yes<br>2= No                                                                                                                 | —     |
| 393h                                                                                                        | What drugs did [NAME] take? <b>Other</b>                                                                            | Specify                                                                                                                        | _____ |
| 394h                                                                                                        | If Yes to gentamicin injection: Did [NAME] receive<br><b>7 consecutive days of gentamycin injection?</b>            | 1=Yes<br>2= No<br>9 = Don't know                                                                                               | —     |
| 395h                                                                                                        | If Yes to amoxicillin: Did [NAME] receive<br><b>7 consecutive days of amoxicillin?</b>                              | 1=Yes<br>2= No<br>9 = Don't know                                                                                               | —     |

**End – thank the participant. Check to see if the participant needs to answer the child module. If so, continue to Module 3. Otherwise check whether there is another woman aged 13-49 in the house.**

### Module 3 – Child Health

| Section 3.1: Identification of and consent from caregivers |                                                                                                             |                                                                         |
|------------------------------------------------------------|-------------------------------------------------------------------------------------------------------------|-------------------------------------------------------------------------|
| 396h                                                       | <b>Interviewer:</b> How many children under 5 years of age live in this household? Check household listing. | —                                                                       |
| 397h                                                       | <b>Interviewer:</b> select name of caregiver from household listing                                         | —                                                                       |
| 398h                                                       | <b>Interviewer:</b> select ID of the caregiver from household listing                                       | —                                                                       |
| 399h                                                       | Is it possible to interview the caregiver?                                                                  | 1=Yes <b>SKIP TO 401</b><br>2=No                                        |
| 400h                                                       | If No, why Not possible to interview the caregiver?                                                         | 1=Travelled away<br>2=Sick<br>3=Currently Not present<br>8=Other reason |
| 401h                                                       | <b>Interviewer:</b> Have you read her the consent form?                                                     | 1=Yes<br>2= No-one is available (add reason)                            |
| 402h                                                       | <b>Interviewer:</b> Does he/she give her consent to be interviewed??                                        | 1=Yes<br>2=No END INTERVIEW.                                            |

| Section 3.2: Knowledge of malaria, diarrhea & pneumonia                              |                                                                            |               |
|--------------------------------------------------------------------------------------|----------------------------------------------------------------------------|---------------|
| <i>Do Not read out list, prompt, 'anything else' record 1=Yes for all that apply</i> |                                                                            |               |
| 403h                                                                                 | Why do you sleep under a mosquito net?<br><b>Protects from malaria</b>     | 1=Yes<br>2=No |
| 404h                                                                                 | Why do you sleep under a mosquito net?<br><b>Protects from mosquitoes</b>  | 1=Yes<br>2=No |
| 405h                                                                                 | Why do you sleep under a mosquito net?<br><b>Given free</b>                | 1=Yes<br>2=No |
| 406h                                                                                 | Why do you sleep under a mosquito net?<br><b>Bought cheaply</b>            | 1=Yes<br>2=No |
| 407h                                                                                 | Why do you sleep under a mosquito net?<br><b>Look attractive</b>           | 1=Yes<br>2=No |
| 408h                                                                                 | Why do you sleep under a mosquito net? Health worker said to use           | 1=Yes<br>2=No |
| 409h                                                                                 | Why do you sleep under a mosquito net?<br><b>Someone told me to use it</b> | 1=Yes<br>2=No |
| 410h                                                                                 | Why do you sleep under a mosquito net?<br><b>Neighbor uses it</b>          | 1=Yes<br>2=No |
| 411h                                                                                 | Why do you sleep under a mosquito net?<br><b>Other</b>                     | Specify       |
| 412h                                                                                 | Why do you sleep under a mosquito net?<br><b>Don't know</b>                | 1=Yes<br>2=No |

| <b>Do Not read out list, prompt, 'anything else' record 1=Yes for all that apply</b> |                                                                                                                       |               |
|--------------------------------------------------------------------------------------|-----------------------------------------------------------------------------------------------------------------------|---------------|
| 413h                                                                                 | If you don't want to get sick from malaria, how can you protect yourself? <b>Use a Bednet</b>                         | 1=Yes<br>2=No |
| 414h                                                                                 | If you don't want to get sick from malaria, how can you protect yourself? <b>Use repellent or spray</b>               | 1=Yes<br>2=No |
| 415h                                                                                 | If you don't want to get sick from malaria, how can you protect yourself? <b>Avoid mosquitoes/bites</b>               | 1=Yes<br>2=No |
| 416h                                                                                 | If you don't want to get sick from malaria, how can you protect yourself? <b>Take medication for</b>                  | 1=Yes<br>2=No |
| 417h                                                                                 | If you don't want to get sick from malaria, how can you protect yourself? <b>prevention Keep surroundings clean</b>   | 1=Yes<br>2=No |
| 418h                                                                                 | If you don't want to get sick from malaria, how can you protect yourself? <b>Eat well</b>                             | 1=Yes<br>2=No |
| 419h                                                                                 | If you don't want to get sick from malaria, how can you protect yourself? <b>Drink boiled water</b>                   | 1=Yes<br>2=No |
| 420h                                                                                 | If you don't want to get sick from malaria, how can you protect yourself? <b>Avoid getting wet from rain</b>          | 1=Yes<br>2=No |
| 421h                                                                                 | If you don't want to get sick from malaria, how can you protect yourself? <b>Other</b>                                | Specify       |
| 422h                                                                                 | If you don't want to get sick from malaria, how can you protect yourself? <b>Don't know</b>                           | 1=Yes<br>2=No |
| <b>423h</b>                                                                          | Have you seen or hear any messages on:<br><b>Bed nets</b>                                                             | 1=Yes<br>2=No |
|                                                                                      | <i>Multiple options are possible. (do Not read out list, prompt, 'anything else' record 1=Yes for all that apply)</i> |               |
| 423h_1                                                                               | Where did you hear the message about <b>Bed nets</b> from?<br><b>Friend</b>                                           | 1=Yes<br>2=No |
| 423h_2                                                                               | Where did you hear the message about <b>Bed nets</b> from?<br><b>At Health Centre</b>                                 | 1=Yes<br>2=No |
| 423h_3                                                                               | Where did you hear the message about <b>Bed nets</b> from?<br><b>HEW</b>                                              | 1=Yes<br>2=No |
| 423h_4                                                                               | Where did you hear the message about <b>Bed nets</b> from?<br><b>WDA</b>                                              | 1=Yes<br>2=No |
| 423h_5                                                                               | Where did you hear the message about <b>Bed nets</b> from?<br><b>Newspaper</b>                                        | 1=Yes<br>2=No |
| 423h_6                                                                               | Where did you hear the message about <b>Bed nets</b> from?<br><b>TV</b>                                               | 1=Yes<br>2=No |
| 423h_7                                                                               | Where did you hear the message about <b>Bed nets</b> from?<br><b>Radio</b>                                            | 1=Yes<br>2=No |
| 423h_8                                                                               | Where did you hear the message about <b>Bed nets</b> from?<br><b>Government official</b>                              | 1=Yes<br>2=No |
| 423h_9                                                                               | Where did you hear the message about <b>Bed nets</b> from?<br><b>Church/Mosque</b>                                    | 1=Yes<br>2=No |
| 423h_10                                                                              | Where did you hear the message about <b>Bed nets</b> from?<br><b>School</b>                                           | 1=Yes<br>2=No |
| 423h_11                                                                              | Where did you hear the message about <b>Bed nets</b> from?<br><b>Poster/flier</b>                                     | 1=Yes<br>2=No |

|                                                                                                          |                                                                                           |               |
|----------------------------------------------------------------------------------------------------------|-------------------------------------------------------------------------------------------|---------------|
| 423h_12                                                                                                  | Where did you hear the message about <b>Bed nets</b> from?<br><b>Meeting</b>              | 1=Yes<br>2=No |
| 423h_13                                                                                                  | Where did you hear the message about <b>Bed nets</b> from?<br><b>Street announcement</b>  | 1=Yes<br>2=No |
| 423h_14                                                                                                  | Where did you hear the message about <b>Bed nets</b> from?<br><b>Other</b>                | Specify       |
|                                                                                                          |                                                                                           |               |
| <b>424h</b>                                                                                              | Have you seen or hear any messages on:<br><b>Malaria treatment using ACT</b>              | 1=Yes<br>2=No |
| <i>Multiple options are possible. (do Not read out list, prompt, 'anything else' for all that apply)</i> |                                                                                           |               |
| 424h_1                                                                                                   | Where did you hear the message about <b>ACT</b> from?<br><b>Friend</b>                    | 1=Yes<br>2=No |
| 424h_2                                                                                                   | Where did you hear the message about <b>ACT</b> from?<br><b>At Health Centre</b>          | 1=Yes<br>2=No |
| 424h_3                                                                                                   | Where did you hear the message about <b>ACT</b> from?<br><b>HEW</b>                       | 1=Yes<br>2=No |
| 424h_4                                                                                                   | Where did you hear the message about <b>ACT</b> from?<br><b>WDA</b>                       | 1=Yes<br>2=No |
| 424h_5                                                                                                   | Where did you hear the message about <b>ACT</b> from?<br><b>Newspaper</b>                 | 1=Yes<br>2=No |
| 424h_6                                                                                                   | Where did you hear the message about <b>ACT</b> from?<br><b>TV</b>                        | 1=Yes<br>2=No |
| 424h_7                                                                                                   | Where did you hear the message about <b>ACT</b> from?<br><b>Radio</b>                     | 1=Yes<br>2=No |
| 424h_8                                                                                                   | Where did you hear the message about <b>ACT</b> from?<br><b>Government official</b>       | 1=Yes<br>2=No |
| 424h_9                                                                                                   | Where did you hear the message about <b>ACT</b> from?<br><b>Church/Mosque</b>             | 1=Yes<br>2=No |
| 424h_10                                                                                                  | Where did you hear the message about <b>ACT</b> from?<br><b>School</b>                    | 1=Yes<br>2=No |
| 424h_11                                                                                                  | Where did you hear the message about <b>ACT</b> from?<br><b>Poster/flier</b>              | 1=Yes<br>2=No |
| 424h_12                                                                                                  | Where did you hear the message about <b>ACT</b> from?<br><b>Meeting</b>                   | 1=Yes<br>2=No |
| 424h_13                                                                                                  | Where did you hear the message about <b>ACT</b> from?<br><b>Street announcement</b>       | 1=Yes<br>2=No |
| 424h_14                                                                                                  | Where did you hear the message about <b>ACT</b> from?<br><b>Other</b>                     | Specify       |
|                                                                                                          |                                                                                           |               |
| <b>425h</b>                                                                                              | Have you seen or hear any messages on:<br><b>Rapid diagnostic tests (RDT) for malaria</b> | 1=Yes<br>2=No |
| <i>Multiple options are possible. (do Not read out list, prompt, 'anything else' for all that apply)</i> |                                                                                           |               |
| 425h_1                                                                                                   | Where did you hear the message about <b>RDT</b> from?<br><b>Friend</b>                    | 1=Yes<br>2=No |
| 425h_2                                                                                                   | Where did you hear the message about <b>RDT</b> from?<br><b>At Health Centre</b>          | 1=Yes<br>2=No |
| 425h_3                                                                                                   | Where did you hear the message about <b>RDT</b> from?<br><b>HEW</b>                       | 1=Yes<br>2=No |

|                                                                                                          |                                                                                                |               |
|----------------------------------------------------------------------------------------------------------|------------------------------------------------------------------------------------------------|---------------|
| 425h_4                                                                                                   | Where did you hear the message about <b>RDT</b> from?<br><b>WDA</b>                            | 1=Yes<br>2=No |
| 425h_5                                                                                                   | Where did you hear the message about <b>RDT</b> from?<br><b>Newspaper</b>                      | 1=Yes<br>2=No |
| 425h_6                                                                                                   | Where did you hear the message about <b>RDT</b> from?<br><b>TV</b>                             | 1=Yes<br>2=No |
| 425h_7                                                                                                   | Where did you hear the message about <b>RDT</b> from?<br><b>Radio</b>                          | 1=Yes<br>2=No |
| 425h_8                                                                                                   | Where did you hear the message about <b>RDT</b> from?<br><b>Government official</b>            | 1=Yes<br>2=No |
| 425h_9                                                                                                   | Where did you hear the message about <b>RDT</b> from?<br><b>Church/Mosque</b>                  | 1=Yes<br>2=No |
| 425h_10                                                                                                  | Where did you hear the message about <b>RDT</b> from?<br><b>School</b>                         | 1=Yes<br>2=No |
| 425h_11                                                                                                  | Where did you hear the message about <b>RDT</b> from?<br><b>Poster/flier</b>                   | 1=Yes<br>2=No |
| 425h_12                                                                                                  | Where did you hear the message about <b>RDT</b> from?<br><b>Meeting</b>                        | 1=Yes<br>2=No |
| 425h_13                                                                                                  | Where did you hear the message about <b>RDT</b> from?<br><b>Street announcement</b>            | 1=Yes<br>2=No |
| 425h_14                                                                                                  | Where did you hear the message about <b>RDT</b> from?<br><b>Other</b>                          | Specify       |
|                                                                                                          |                                                                                                |               |
| <b>426h</b>                                                                                              | Have you seen or hear any messages on:<br><b>Rectal artesunate</b>                             | 1=Yes<br>2=No |
| <i>Multiple options are possible. (do Not read out list, prompt, 'anything else' for all that apply)</i> |                                                                                                |               |
| 426h_1                                                                                                   | Where did you hear the message about <b>Rectal artesunate</b> from? <b>Friend</b>              | 1=Yes<br>2=No |
| 426h_2                                                                                                   | Where did you hear the message about <b>Rectal artesunate</b> from? <b>At Health Centre</b>    | 1=Yes<br>2=No |
| 426h_3                                                                                                   | Where did you hear the message about <b>Rectal artesunate</b> from? <b>HEW</b>                 | 1=Yes<br>2=No |
| 426h_4                                                                                                   | Where did you hear the message about <b>Rectal artesunate</b> from? <b>WDA</b>                 | 1=Yes<br>2=No |
| 426h_5                                                                                                   | Where did you hear the message about <b>Rectal artesunate</b> from? <b>Newspaper</b>           | 1=Yes<br>2=No |
| 426h_6                                                                                                   | Where did you hear the message about <b>Rectal artesunate</b> from? <b>TV</b>                  | 1=Yes<br>2=No |
| 426h_7                                                                                                   | Where did you hear the message about <b>Rectal artesunate</b> from? <b>Radio</b>               | 1=Yes<br>2=No |
| 426h_8                                                                                                   | Where did you hear the message about <b>Rectal artesunate</b> from? <b>Government official</b> | 1=Yes<br>2=No |
| 426h_9                                                                                                   | Where did you hear the message about <b>Rectal artesunate</b> from? <b>Church/Mosque</b>       | 1=Yes<br>2=No |
| 426h_10                                                                                                  | Where did you hear the message about <b>Rectal artesunate</b> from? <b>School</b>              | 1=Yes<br>2=No |
| 426h_11                                                                                                  | Where did you hear the message about <b>Rectal artesunate</b> from? <b>Poster/flier</b>        | 1=Yes<br>2=No |



|                                                                                                          |                                                                                                 |               |
|----------------------------------------------------------------------------------------------------------|-------------------------------------------------------------------------------------------------|---------------|
| 426h_12                                                                                                  | Where did you hear the message about <b>Rectal artesunate</b> from? <b>Meeting</b>              | 1=Yes<br>2=No |
| 426h_13                                                                                                  | Where did you hear the message about <b>Rectal artesunate</b> from? <b>Street announcement</b>  | 1=Yes<br>2=No |
| 426h_14                                                                                                  | Where did you hear the message about <b>Rectal artesunate</b> from? <b>Other</b>                | Specify       |
|                                                                                                          |                                                                                                 |               |
| <b>427h</b>                                                                                              | Have you seen or hear any messages on:<br><b>Diarrhea treatment</b>                             | 1=Yes<br>2=No |
| <i>Multiple options are possible. (do Not read out list, prompt, 'anything else' for all that apply)</i> |                                                                                                 |               |
| 427h_1                                                                                                   | Where did you hear the message about <b>Diarrhea treatment</b> from? <b>Friend</b>              | 1=Yes<br>2=No |
| 427h_2                                                                                                   | Where did you hear the message about <b>Diarrhea treatment</b> from? <b>At Health Centre</b>    | 1=Yes<br>2=No |
| 427h_3                                                                                                   | Where did you hear the message about <b>Diarrhea treatment</b> from? <b>HEW</b>                 | 1=Yes<br>2=No |
| 427h_4                                                                                                   | Where did you hear the message about <b>Diarrhea treatment</b> from? <b>WDA</b>                 | 1=Yes<br>2=No |
| 427h_5                                                                                                   | Where did you hear the message about <b>Diarrhea treatment</b> from? <b>Newspaper</b>           | 1=Yes<br>2=No |
| 427h_6                                                                                                   | Where did you hear the message about <b>Diarrhea treatment</b> from? <b>TV</b>                  | 1=Yes<br>2=No |
| 427h_7                                                                                                   | Where did you hear the message about <b>Diarrhea treatment</b> from? <b>Radio</b>               | 1=Yes<br>2=No |
| 427h_8                                                                                                   | Where did you hear the message about <b>Diarrhea treatment</b> from? <b>Government official</b> | 1=Yes<br>2=No |
| 427h_9                                                                                                   | Where did you hear the message about <b>Diarrhea treatment</b> from? <b>Church/Mosque</b>       | 1=Yes<br>2=No |
| 427h_10                                                                                                  | Where did you hear the message about <b>Diarrhea treatment</b> from? <b>School</b>              | 1=Yes<br>2=No |
| 427h_11                                                                                                  | Where did you hear the message about <b>Diarrhea treatment</b> from? <b>Poster/flier</b>        | 1=Yes<br>2=No |
| 427h_12                                                                                                  | Where did you hear the message about <b>Diarrhea treatment</b> from? <b>Meeting</b>             | 1=Yes<br>2=No |
| 427h_13                                                                                                  | Where did you hear the message about <b>Diarrhea treatment</b> from? <b>Street announcement</b> | 1=Yes<br>2=No |
| 427h_14                                                                                                  | Where did you hear the message about <b>Diarrhea treatment</b> from? <b>Other</b>               | Specify       |
|                                                                                                          |                                                                                                 |               |
| <b>428h</b>                                                                                              | Have you seen or hear any messages on:<br><b>Pneumonia treatment</b>                            | 1=Yes<br>2=No |
| <i>Multiple options are possible. (do Not read out list, prompt, 'anything else' for all that apply)</i> |                                                                                                 |               |
| 428h_1                                                                                                   | Where did you hear the message about <b>Pneumonia treatment</b> from? <b>Friend</b>             | 1=Yes<br>2=No |
| 428h_2                                                                                                   | Where did you hear the message about <b>Pneumonia treatment</b> from? <b>At Health Centre</b>   | 1=Yes<br>2=No |
| 428h_3                                                                                                   | Where did you hear the message about <b>Pneumonia treatment</b> from? <b>HEW</b>                | 1=Yes<br>2=No |

|                                                                                                          |                                                                                                          |               |
|----------------------------------------------------------------------------------------------------------|----------------------------------------------------------------------------------------------------------|---------------|
| 428h_4                                                                                                   | Where did you hear the message about <b>Pneumonia treatment</b> from? <b>WDA</b>                         | 1=Yes<br>2=No |
| 428h_5                                                                                                   | Where did you hear the message about <b>Pneumonia treatment</b> from? <b>Newspaper</b>                   | 1=Yes<br>2=No |
| 428h_6                                                                                                   | Where did you hear the message about <b>Pneumonia treatment</b> from? <b>TV</b>                          | 1=Yes<br>2=No |
| 428h_7                                                                                                   | Where did you hear the message about <b>Pneumonia treatment</b> from? <b>Radio</b>                       | 1=Yes<br>2=No |
| 428h_8                                                                                                   | Where did you hear the message about <b>Pneumonia treatment</b> from? <b>Government official</b>         | 1=Yes<br>2=No |
| 428h_9                                                                                                   | Where did you hear the message about <b>Pneumonia treatment</b> from? <b>Church/Mosque</b>               | 1=Yes<br>2=No |
| 428h_10                                                                                                  | Where did you hear the message about <b>Pneumonia treatment</b> from? <b>School</b>                      | 1=Yes<br>2=No |
| 428h_11                                                                                                  | Where did you hear the message about <b>Pneumonia treatment</b> from? <b>Poster/flier</b>                | 1=Yes<br>2=No |
| 428h_12                                                                                                  | Where did you hear the message about <b>Pneumonia treatment</b> from? <b>Meeting</b>                     | 1=Yes<br>2=No |
| 428h_13                                                                                                  | Where did you hear the message about <b>Pneumonia treatment</b> from? <b>Street announcement</b>         | 1=Yes<br>2=No |
| 428h_14                                                                                                  | Where did you hear the message about <b>Pneumonia treatment</b> from? <b>Other</b>                       | Specify       |
|                                                                                                          |                                                                                                          |               |
| <b>429h</b>                                                                                              | Have you seen or hear any messages on:<br><b>Treatment for sick newborns</b>                             | 1=Yes<br>2=No |
| 429h_1                                                                                                   | Where did you hear the message about <b>Pneumonia treatment</b> from? <b>Friend</b>                      | 1=Yes<br>2=No |
| <i>Multiple options are possible. (do Not read out list, prompt, 'anything else' for all that apply)</i> |                                                                                                          |               |
| 429h_2                                                                                                   | Where did you hear the message <b>Treatment for sick newborns</b> from? <b>At Health Centre</b>          | 1=Yes<br>2=No |
| 429h_3                                                                                                   | Where did you hear the message about <b>Treatment for sick newborns</b> from? <b>HEW</b>                 | 1=Yes<br>2=No |
| 429h_4                                                                                                   | Where did you hear the message about <b>Treatment for sick newborns</b> from? <b>WDA</b>                 | 1=Yes<br>2=No |
| 429h_5                                                                                                   | Where did you hear the message about <b>Treatment for sick newborns</b> from? <b>Newspaper</b>           | 1=Yes<br>2=No |
| 429h_6                                                                                                   | Where did you hear the message about <b>Treatment for sick newborns</b> from? <b>TV</b>                  | 1=Yes<br>2=No |
| 429h_7                                                                                                   | Where did you hear the message about <b>Treatment for sick newborns</b> from? <b>Radio</b>               | 1=Yes<br>2=No |
| 429h_8                                                                                                   | Where did you hear the message about <b>Treatment for sick newborns</b> from? <b>Government official</b> | 1=Yes<br>2=No |
| 429h_9                                                                                                   | Where did you hear the message about <b>Treatment for sick newborns</b> from? <b>Church/Mosque</b>       | 1=Yes<br>2=No |
| 429h_10                                                                                                  | Where did you hear the message about <b>Treatment for sick newborns</b> from? <b>School</b>              | 1=Yes<br>2=No |
| 429h_11                                                                                                  | Where did you hear the message about <b>Treatment for sick newborns</b> from? <b>Poster/flier</b>        | 1=Yes<br>2=No |

|         |                                                                                                          |               |
|---------|----------------------------------------------------------------------------------------------------------|---------------|
| 429h_12 | Where did you hear the message about <b>Treatment for sick newborns</b> from? <b>Meeting</b>             | 1=Yes<br>2=No |
| 429h_13 | Where did you hear the message about <b>Treatment for sick newborns</b> from? <b>Street announcement</b> | 1=Yes<br>2=No |
| 429h_14 | Where did you hear the message about <b>Treatment for sick newborns</b> from? <b>Other</b>               | Specify       |

| Do Not read out list, prompt, 'anything else' record 1=Yes for all that apply) |                                                                                                    |               |   |
|--------------------------------------------------------------------------------|----------------------------------------------------------------------------------------------------|---------------|---|
| 444h                                                                           | If your child is sick with a <b>fever</b> what should you do? <b>Ignore it will go away</b>        | 1=Yes<br>2=No | — |
| 445h                                                                           | If your child is sick with a <b>fever</b> what should you do? <b>Go to health centre</b>           | 1=Yes<br>2=No | — |
| 446h                                                                           | If your child is sick with a <b>fever</b> what should you do? <b>Go to HEW</b>                     | 1=Yes<br>2=No | — |
| 447h                                                                           | If your child is sick with a <b>fever</b> what should you do? <b>Go to WDA</b>                     | 1=Yes<br>2=No | — |
| 448h                                                                           | If your child is sick with a <b>fever</b> what should you do? <b>Go to traditional healer</b>      | 1=Yes<br>2=No | — |
| 449h                                                                           | If your child is sick with a <b>fever</b> what should you do? <b>Ask to be tested for malaria</b>  | 1=Yes<br>2=No | — |
| 450h                                                                           | If your child is sick with a <b>fever</b> what should you do? <b>Treat with antimalarial / ACT</b> | 1=Yes<br>2=No | — |
| 451h                                                                           | If your child is sick with a <b>fever</b> what should you do? <b>Treat with paracetamol</b>        | 1=Yes<br>2=No | — |
| 452h                                                                           | If your child is sick with a <b>fever</b> what should you do? <b>Treat with antibiotic</b>         | 1=Yes<br>2=No | — |
| 453h                                                                           | If your child is sick with a <b>fever</b> what should you do? <b>Treat with other medicine</b>     | 1=Yes<br>2=No | — |
| 454h                                                                           | If your child is sick with a <b>fever</b> what should you do? <b>Other</b>                         | Specify       | — |
| Do Not read out list, prompt, 'anything else' record 1=Yes for all that apply) |                                                                                                    |               |   |
| 455h                                                                           | If your child is sick with a <b>diarrhea</b> what should you do? <b>Ignore it will go away</b>     | 1=Yes<br>2=No | — |
| 456h                                                                           | If your child is sick with a <b>diarrhea</b> what should you do? <b>Go to health centre</b>        | 1=Yes<br>2=No | — |
| 457h                                                                           | If your child is sick with a <b>diarrhea</b> what should you do? <b>Go to HEW</b>                  | 1=Yes<br>2=No | — |
| 458h                                                                           | If your child is sick with a <b>diarrhea</b> what should you do? <b>Go to WDA</b>                  | 1=Yes<br>2=No | — |
| 459h                                                                           | If your child is sick with a <b>diarrhea</b> what should you do? <b>Go to traditional healer</b>   | 1=Yes<br>2=No | — |
| 460h                                                                           | If your child is sick with a <b>diarrhea</b> what should you do? <b>Fluid made from a special</b>  | 1=Yes<br>2=No | — |

|                                                                                       |                                                                                                                            |               |   |
|---------------------------------------------------------------------------------------|----------------------------------------------------------------------------------------------------------------------------|---------------|---|
|                                                                                       | <b>packet / ordinary rehydration salts (ORS)</b>                                                                           |               |   |
| 461h                                                                                  | If your child is sick with a <b>diarrhea</b> what should you do? <b>A gov-recommended home-made fluid for diarrhoea</b>    | 1=Yes<br>2=No | — |
| 462h                                                                                  | If your child is sick with a <b>diarrhea</b> what should you do? <b>Treat with paracetamol</b>                             | 1=Yes<br>2=No | — |
| 463h                                                                                  | If your child is sick with a <b>diarrhea</b> what should you do? <b>Treat with antibiotic</b>                              | 1=Yes<br>2=No | — |
| 464h                                                                                  | If your child is sick with a <b>diarrhea</b> what should you do? <b>Treat with other medicine</b>                          | 1=Yes<br>2=No | — |
| 465h                                                                                  | If your child is sick with a <b>diarrhea</b> what should you do? <b>Other</b>                                              | Specify       | — |
| <i>Do Not read out list, prompt, 'anything else' record 1=Yes for all that apply)</i> |                                                                                                                            |               |   |
| 466h                                                                                  | If your child is sick with a <b>cough/ respiratory infection</b> what should you do? <b>Ignore it will go away</b>         | 1=Yes<br>2=No | — |
| 467h                                                                                  | If your child is sick with a <b>cough/ respiratory infection</b> what should you do? <b>Go to health centre</b>            | 1=Yes<br>2=No | — |
| 468h                                                                                  | If your child is sick with a <b>cough/ respiratory infection</b> what should you do? <b>Go to HEW</b>                      | 1=Yes<br>2=No | — |
| 469h                                                                                  | If your child is sick with a <b>cough/ respiratory infection</b> what should you do? <b>Go to WDA</b>                      | 1=Yes<br>2=No | — |
| 470h                                                                                  | If your child is sick with a <b>cough/ respiratory infection</b> what should you do? <b>Go to traditional healer</b>       | 1=Yes<br>2=No | — |
| 471h                                                                                  | If your child is sick with a <b>cough/ respiratory infection</b> what should you do? <b>Treat with antibiotic</b>          | 1=Yes<br>2=No | — |
| 472h                                                                                  | If your child is sick with a <b>cough/ respiratory infection</b> what should you do? <b>Treat with paracetamol</b>         | 1=Yes<br>2=No | — |
| 473h                                                                                  | If your child is sick with a <b>cough/ respiratory infection</b> what should you do? <b>Treat with other medicine</b>      | 1=Yes<br>2=No | — |
| 474h                                                                                  | If your child is sick with a <b>cough/ respiratory infection</b> what should you do? <b>Other action</b>                   | Specify       | — |
| <i>Do Not read out list, prompt, 'anything else' record 1=Yes for all that apply)</i> |                                                                                                                            |               |   |
| 475h                                                                                  | What are the signs of illness for a newborn baby? <b>Reduced feeding</b>                                                   | 1=Yes<br>2=No | — |
| 476h                                                                                  | What are the signs of illness for a newborn baby? <b>Difficult or fast breathing</b>                                       | 1=Yes<br>2=No | — |
| 477h                                                                                  | What are the signs of illness for a newborn baby? <b>Movement only when stimulated or No movement even when stimulated</b> | 1=Yes<br>2=No | — |

|                                                                                                                                                                                                   |                                                                                                                      |               |   |
|---------------------------------------------------------------------------------------------------------------------------------------------------------------------------------------------------|----------------------------------------------------------------------------------------------------------------------|---------------|---|
| 478h                                                                                                                                                                                              | What are the signs of illness for a newborn baby? <b>Unusually hot or cold</b>                                       | 1=Yes<br>2=No | — |
| 479h                                                                                                                                                                                              | What are the signs of illness for a newborn baby? <b>Convulsions</b>                                                 | 1=Yes<br>2=No | — |
| 480h                                                                                                                                                                                              | What are the signs of illness for a newborn baby? <b>Severe chest in-drawing</b>                                     | 1=Yes<br>2=No | — |
| 481h                                                                                                                                                                                              | What are the signs of illness for a newborn baby? <b>Yellow palms/soles/eyes</b>                                     | 1=Yes<br>2=No | — |
| 482h                                                                                                                                                                                              | What are the signs of illness for a newborn baby? <b>Diarrhea</b>                                                    | 1=Yes<br>2=No | — |
| 483h                                                                                                                                                                                              | What are the signs of illness for a newborn baby? <b>Skin pustules</b>                                               | 1=Yes<br>2=No | — |
| 484h                                                                                                                                                                                              | What are the signs of illness for a newborn baby? <b>Cord red or draining puss</b>                                   | 1=Yes<br>2=No | — |
| 485h                                                                                                                                                                                              | What are the signs of illness for a newborn baby? <b>Small infant (weight &lt;2000 grams)</b>                        | 1=Yes<br>2=No | — |
| <i>Symptoms are: reduced feeding, difficult or fast breathing, Movement only when stimulated or No movement even when stimulated, unusually hot or cold, convulsions, severe chest in-drawing</i> |                                                                                                                      |               |   |
| 486h                                                                                                                                                                                              | If your newborn child has <b>symptoms of neonatal sepsis</b> what should you do?<br><b>Ignore it will go away</b>    | 1=Yes<br>2=No | — |
| 487h                                                                                                                                                                                              | If your newborn child has <b>symptoms of neonatal sepsis</b> what should you do?<br><b>Go to health centre</b>       | 1=Yes<br>2=No | — |
| 488h                                                                                                                                                                                              | If your newborn child has <b>symptoms of neonatal sepsis</b> what should you do?<br><b>Go to HEW</b>                 | 1=Yes<br>2=No | — |
| 489h                                                                                                                                                                                              | If your newborn child has <b>symptoms of neonatal sepsis</b> what should you do?<br><b>Go to WDA</b>                 | 1=Yes<br>2=No | — |
| 490h                                                                                                                                                                                              | If your newborn child has <b>symptoms of neonatal sepsis</b> what should you do?<br><b>Go to traditional healer</b>  | 1=Yes<br>2=No | — |
| 491h                                                                                                                                                                                              | If your newborn child has <b>symptoms of neonatal sepsis</b> what should you do?<br><b>Treat with antibiotic</b>     | 1=Yes<br>2=No | — |
| 492h                                                                                                                                                                                              | If your newborn child has <b>symptoms of neonatal sepsis</b> what should you do?<br><b>Treat with paracetamol</b>    | 1=Yes<br>2=No | — |
| 493h                                                                                                                                                                                              | If your newborn child has <b>symptoms of neonatal sepsis</b> what should you do?<br><b>Treat with other medicine</b> | 1=Yes<br>2=No | — |
| 494h                                                                                                                                                                                              | If your newborn child has <b>symptoms of neonatal sepsis</b> what should you do?<br><b>Other action</b>              | Specify       | — |

| <b>Section 3.3: Health care available in kebele and recent interactions</b>                           |                                                                                                                                                                        |                                                                                                                                                                                                                                                                                                                                                                          |         |
|-------------------------------------------------------------------------------------------------------|------------------------------------------------------------------------------------------------------------------------------------------------------------------------|--------------------------------------------------------------------------------------------------------------------------------------------------------------------------------------------------------------------------------------------------------------------------------------------------------------------------------------------------------------------------|---------|
| 495h                                                                                                  | Is there a health post in your kebele?                                                                                                                                 | 1= Yes<br>2=No <b>SKIP TO 506</b>                                                                                                                                                                                                                                                                                                                                        | ___     |
| 496h                                                                                                  | How long does it take you to walk to the nearest health post?                                                                                                          | <i>Record the distance in minutes.<br/>If don't know, record 99</i>                                                                                                                                                                                                                                                                                                      | ___     |
| 497h                                                                                                  | How many times have you visited the health post in the last six months?                                                                                                | <i>Record the number of times<br/>If any visits last 6 months,<br/><b>SKIP TO 504</b></i>                                                                                                                                                                                                                                                                                | ___     |
| <i>Do Not read out list, prompt, 'anything else' record 1=Yes for all that apply then SKIP TO 504</i> |                                                                                                                                                                        |                                                                                                                                                                                                                                                                                                                                                                          |         |
| 498h                                                                                                  | If never in the last 6 months: What are the reasons why you have Not visited the health post in the last six months? <b>No illness in the family/No births</b>         | 1=Yes<br>2=No                                                                                                                                                                                                                                                                                                                                                            | ___     |
| 499h                                                                                                  | If never in the last 6 months: What are the reasons why you have Not visited the health post in the last six months? <b>Health post is too far away</b>                | 1=Yes<br>2=No                                                                                                                                                                                                                                                                                                                                                            | ___     |
| 500h                                                                                                  | If never in the last 6 months: What are the reasons why you have Not visited the health post in the last six months? <b>health post Costs too much to go to</b>        | 1=Yes<br>2=No                                                                                                                                                                                                                                                                                                                                                            | ___     |
| 501h                                                                                                  | If never in the last 6 months: What are the reasons why you have Not visited the health post in the last six months? <b>Not enough time to visit</b>                   | 1=Yes<br>2=No                                                                                                                                                                                                                                                                                                                                                            | ___     |
| 502h                                                                                                  | If never in the last 6 months: What are the reasons why you have Not visited the health post in the last six months? <b>Poor services available at the health post</b> | 1=Yes<br>2=No                                                                                                                                                                                                                                                                                                                                                            | ___     |
| 503h                                                                                                  | If never in the last 6 months: What are the reasons why you have Not visited the health post in the last six months? <b>Other</b>                                      | Specify                                                                                                                                                                                                                                                                                                                                                                  | _____   |
| 504h                                                                                                  | When was the last time you visited that health post?                                                                                                                   | <i>Record DD/MM. If don't know<br/>99/99. If know month but Not day<br/>record 99/MM</i>                                                                                                                                                                                                                                                                                 | ___/___ |
| 505h                                                                                                  | The last time you visited the health post, what was the primary reason?                                                                                                | 01=Family planning<br>02=Child immunisation<br>03=Antenatal care<br>04=Delivery care<br>05=Postnatal care<br>06=Neonatal care<br>07=Health education<br>08=Growth monitoring<br>09=Referral of sick child<br>10=Diarrhea treatment<br>11=Malaria treatment<br>13=Pneumonia treatment<br>14=other treatment of sickness<br>15=receive mosquito nets<br>88=other (specify) | ___     |
| 506h                                                                                                  | Is there another health facility in your kebele?                                                                                                                       | 1= Yes<br>2=No <b>SKIP TO 518</b>                                                                                                                                                                                                                                                                                                                                        | ___     |
| 507h                                                                                                  | What kind of a health facility                                                                                                                                         | 1=Health Centre<br>2=Hospital                                                                                                                                                                                                                                                                                                                                            | ___     |

|                                                                                                       |                                                                                                                                                                                |                                                                                                                                                                                                                                                                                                                                                                           |         |
|-------------------------------------------------------------------------------------------------------|--------------------------------------------------------------------------------------------------------------------------------------------------------------------------------|---------------------------------------------------------------------------------------------------------------------------------------------------------------------------------------------------------------------------------------------------------------------------------------------------------------------------------------------------------------------------|---------|
|                                                                                                       |                                                                                                                                                                                | 3=Private clinic<br>8=Other                                                                                                                                                                                                                                                                                                                                               |         |
| 508h                                                                                                  | How long does it take you to walk to the nearest health facility?                                                                                                              | Record the distance in minutes. If don't know, record 99                                                                                                                                                                                                                                                                                                                  | _____   |
| 509h                                                                                                  | How many times have you visited the health facility in the last 6 months?                                                                                                      | Record the number of times<br>If any visits last 6 months,<br><b>SKIP TO 516</b>                                                                                                                                                                                                                                                                                          | ___     |
| <b>Do Not read out list, prompt, 'anything else' record 1=Yes for all that apply Then SKIP TO 516</b> |                                                                                                                                                                                |                                                                                                                                                                                                                                                                                                                                                                           |         |
| 510h                                                                                                  | If never in the last 6 months: What are the reasons why you have Not visited the health facility in the last six months?<br><b>No illness in the family/No births</b>          | 1=Yes<br>2=No                                                                                                                                                                                                                                                                                                                                                             | ___     |
| 511h                                                                                                  | If never in the last 6 months: What are the reasons why you have Not visited the health facility in the last six months?<br><b>Health facility is too far away</b>             | 1=Yes<br>2=No                                                                                                                                                                                                                                                                                                                                                             | ___     |
| 512h                                                                                                  | If never in the last 6 months: What are the reasons why you have Not visited the health facility in the last six months?<br><b>Costs too much to go to health post</b>         | 1=Yes<br>2=No                                                                                                                                                                                                                                                                                                                                                             | ___     |
| 513h                                                                                                  | If never in the last 6 months: What are the reasons why you have Not visited the health facility in the last six months?<br><b>Not enough time to visit</b>                    | 1=Yes<br>2=No                                                                                                                                                                                                                                                                                                                                                             | ___     |
| 514h                                                                                                  | If never in the last 6 months: What are the reasons why you have Not visited the health facility in the last six months? <b>Poor services available at the health facility</b> | 1=Yes<br>2=No                                                                                                                                                                                                                                                                                                                                                             | ___     |
| 515h                                                                                                  | If never in the last 6 months: What are the reasons why you have Not visited the health facility in the last six months? <b>Other</b>                                          | Specify                                                                                                                                                                                                                                                                                                                                                                   | _____   |
| 516h                                                                                                  | When was the last time you visited that health facility?                                                                                                                       | Record DD/MM. If don't know 99/99. If know month but Not day record 99/MM                                                                                                                                                                                                                                                                                                 | ___/___ |
| 517h                                                                                                  | The last time you visited the health facility, what was the primary reason?                                                                                                    | 01=Family planning<br>02=Child immunisation<br>03=Antenatal care<br>04=Delivery care<br>05=Postnatal care<br>06=Neonatal care<br>07=Health education<br>08=Growth monitoring<br>09=Referral of sick child<br>10=Diarrhoea treatment<br>11=Malaria treatment<br>13=Pneumonia treatment<br>14=Other treatment of sickness<br>15=Receive mosquito nets<br>88=Other (specify) | _____   |
| 518h                                                                                                  | Have you been visited at home during the past 6 months by a Health Extension Worker to talk about health related issues?                                                       | 1= Yes<br>2=No<br><b>SKIP TO 537</b>                                                                                                                                                                                                                                                                                                                                      | ___     |
| 519h                                                                                                  | When was the last time the HEW visited you at home?                                                                                                                            | Record DD/MM. If don't know 99/99. If know month but Not day record 99/MM                                                                                                                                                                                                                                                                                                 | ___/___ |
| <b>Do Not read out list, prompt, 'anything else' record 1=Yes for all that apply</b>                  |                                                                                                                                                                                |                                                                                                                                                                                                                                                                                                                                                                           |         |

|                                                                                      |                                                                                                    |                                                                                  |   |
|--------------------------------------------------------------------------------------|----------------------------------------------------------------------------------------------------|----------------------------------------------------------------------------------|---|
| 520h                                                                                 | Who did the HEW talk to the last time she visited you at home? <b>Myself</b>                       | 1=Yes<br>2=No                                                                    | — |
| 521h                                                                                 | Who did the HEW talk to the last time she visited you at home? <b>Other adult woman</b>            | 1=Yes<br>2=No                                                                    | — |
| 522h                                                                                 | Who did the HEW talk to the last time she visited you at home? <b>Head of household</b>            | 1=Yes<br>2=No                                                                    | — |
| 523h                                                                                 | Who did the HEW talk to the last time she visited you at home? <b>Other adult male</b>             | 1=Yes<br>2=No                                                                    | — |
| <i>Do Not read out list, prompt, 'anything else' record 1=Yes for all that apply</i> |                                                                                                    |                                                                                  |   |
| 524h                                                                                 | What was discussed the last time the HEW visited you at home? <b>Immunisation</b>                  | 1= Yes<br>2=No                                                                   | — |
| 525h                                                                                 | What was discussed the last time the HEW visited you at home? <b>Child nutrition</b>               | 1=Yes<br>2=No                                                                    | — |
| 526h                                                                                 | What was discussed the last time the HEW visited you at home? <b>Family planning</b>               | 1=Yes<br>2=No                                                                    | — |
| 527h                                                                                 | What was discussed the last time the HEW visited you at home? <b>Pregnancy care</b>                | 1=Yes<br>2=No                                                                    | — |
| 528h                                                                                 | What was discussed the last time the HEW visited you at home? <b>Delivery care</b>                 | 1=Yes<br>2=No                                                                    | — |
| 529h                                                                                 | What was discussed the last time the HEW visited you at home? <b>Newborn care / postnatal care</b> | 1=Yes<br>2=No                                                                    | — |
| 530h                                                                                 | What was discussed the last time the HEW visited you at home? <b>Information about HIV/AIDS</b>    | 1=Yes<br>2=No                                                                    | — |
| 531h                                                                                 | What was discussed the last time the HEW visited you at home? <b>Information on hygiene</b>        | 1=Yes<br>2=No                                                                    | — |
| 532h                                                                                 | What was discussed the last time the HEW visited you at home? <b>Diarrhea treatment</b>            | 1=Yes<br>2=No                                                                    | — |
| 533h                                                                                 | What was discussed the last time the HEW visited you at home? <b>Malaria treatment</b>             | 1=Yes<br>2=No                                                                    | — |
| 534h                                                                                 | What was discussed the last time the HEW visited you at home? <b>Pneumonia treatment</b>           | 1=Yes<br>2=No                                                                    | — |
| 535h                                                                                 | What was discussed the last time the HEW visited you at home? <b>Promotion of latrine use</b>      | 1=Yes<br>2=No                                                                    | — |
| 536h                                                                                 | What was discussed the last time the HEW visited you at home? <b>Promotion of safe water use</b>   | 1=Yes<br>2=No                                                                    | — |
| <i>Do Not read out list, prompt, 'anything else' record 1=Yes for all that apply</i> |                                                                                                    |                                                                                  |   |
| 537h                                                                                 | Are you aware of women development army who visit people at home to talk about health issues?      | 1= Yes<br>2=No <b>SKIP TO 556</b>                                                | — |
| 538h                                                                                 | If Yes When was the last time the WDA visited you at home?                                         | <i>Record DD/MM. If don't know 99/99. If know month but Not day record 99/MM</i> | — |
| <i>Do Not read out list, prompt, 'anything else' record 1=Yes for all that apply</i> |                                                                                                    |                                                                                  |   |
| 539h                                                                                 | Who did the WDA talk to at that last visited to your home? <b>Myself</b>                           | 1=Yes<br>2=No                                                                    | — |
| 540h                                                                                 | Who did the WDA talk to at that last visited to your home? <b>Other adult woman</b>                | 1=Yes<br>2=No                                                                    | — |
| 541h                                                                                 | Who did the WDA talk to at that last visited to your home? <b>Head of household</b>                | 1=Yes<br>2=No                                                                    | — |
| 542h                                                                                 | Who did the WDA talk to at that last visited to your home? <b>Other adult male</b>                 | 1=Yes<br>2=No                                                                    | — |
| <i>Do Not read out list, prompt, 'anything else' record 1=Yes for all that apply</i> |                                                                                                    |                                                                                  |   |
| 543h                                                                                 | What was discussed the last time the WDA visited you at home? <b>Immunisation</b>                  | 1=Yes<br>2=No                                                                    | — |
| 544h                                                                                 | What was discussed the last time the WDA visited you at home? <b>Child nutrition</b>               | 1=Yes<br>2=No                                                                    | — |



|                                                                                      |                                                                                                                                                                      |                                                                                                                     |                         |
|--------------------------------------------------------------------------------------|----------------------------------------------------------------------------------------------------------------------------------------------------------------------|---------------------------------------------------------------------------------------------------------------------|-------------------------|
| 545h                                                                                 | What was discussed the last time the WDA visited you at home? <b>Family planning</b>                                                                                 | 1=Yes<br>2=No                                                                                                       | —                       |
| 546h                                                                                 | What was discussed the last time the WDA visited you at home? <b>Pregnancy care</b>                                                                                  | 1=Yes<br>2=No                                                                                                       | —                       |
| 547h                                                                                 | What was discussed the last time the WDA visited you at home? <b>Delivery care</b>                                                                                   | 1=Yes<br>2=No                                                                                                       | —                       |
| 548h                                                                                 | What was discussed the last time the WDA visited you at home? <b>Newborn care / postnatal care</b>                                                                   | 1=Yes<br>2=No                                                                                                       | —                       |
| 549h                                                                                 | What was discussed the last time the WDA visited you at home? <b>Information about HIV/AIDS</b>                                                                      | 1=Yes<br>2=No                                                                                                       | —                       |
| 550h                                                                                 | What was discussed the last time the WDA visited you at home? <b>Information on hygiene</b>                                                                          | 1=Yes<br>2=No                                                                                                       | —                       |
| 551h                                                                                 | What was discussed the last time the WDA visited you at home? <b>Diarrhoea treatment</b>                                                                             | 1=Yes<br>2=No                                                                                                       | —                       |
| 552h                                                                                 | What was discussed the last time the WDA visited you at home? <b>Malaria treatment</b>                                                                               | 1=Yes<br>2=No                                                                                                       | —                       |
| 553h                                                                                 | What was discussed the last time the WDA visited you at home? <b>Pneumonia treatment</b>                                                                             | 1=Yes<br>2=No                                                                                                       | —                       |
| 554h                                                                                 | What was discussed the last time the WDA visited you at home? <b>Promotion of latrine use</b>                                                                        | 1=Yes<br>2=No                                                                                                       | —                       |
| 555h                                                                                 | What was discussed the last time the WDA visited you at home? <b>Promotion of safe water use</b>                                                                     | 1=Yes<br>2=No                                                                                                       | —                       |
| 556h                                                                                 | Have you participated in developing local community-based action plan addressing maternal newborn and child health issues about health issues in the past 12 months? | 1= Yes<br>2=No                                                                                                      | <b>SKIP TO 559</b><br>— |
| 557h                                                                                 | If Yes: When did you last participate in a community-based action plan?                                                                                              | <i>Record DD/MM. If don't know 99/99. If know month but Not day record 99/MM</i>                                    | ___/___                 |
| 558h                                                                                 | Who organized the community-based action plan?                                                                                                                       | 1=Kebele health team<br>2=Health extension worker<br>3=Community health worker<br>8=other (specify)<br>9=don't know | —                       |
| 559h                                                                                 | Have you attended any meetings in your community (outside your home) about health issues in the past 12 months?                                                      | 1= Yes<br>2=No                                                                                                      | <b>SKIP TO 575</b><br>— |
| 560h                                                                                 | If Yes: When was the last meeting you attended outside your home?                                                                                                    | <i>Record DD/MM. If don't know 99/99. If know month but Not day record 99/MM</i>                                    | ___/___                 |
| 561h                                                                                 | Who organised the last meeting?                                                                                                                                      | 1=Kebele health team<br>2=Health extension worker<br>3=Community health worker<br>8=other (specify)<br>9=don't know | —                       |
| <i>Do Not read out list, prompt, 'anything else' record 1=Yes for all that apply</i> |                                                                                                                                                                      |                                                                                                                     |                         |
| 562h                                                                                 | What was discussed at the last community meeting you attended outside your home? <b>Immunisation</b>                                                                 | 1= Yes<br>2=No                                                                                                      | —                       |
| 563h                                                                                 | What was discussed at the last community meeting you attended outside your home? <b>Child nutrition</b>                                                              | 1= Yes<br>2=No                                                                                                      | —                       |
| 564h                                                                                 | What was discussed at the last community meeting you attended outside your home? <b>Family planning</b>                                                              | 1= Yes<br>2=No                                                                                                      | —                       |
| 565h                                                                                 | What was discussed at the last community meeting you attended outside your home?                                                                                     | 1= Yes<br>2=No                                                                                                      | —                       |

|      |                                                                                                                          |                |   |
|------|--------------------------------------------------------------------------------------------------------------------------|----------------|---|
|      | <b>Pregnancy care</b>                                                                                                    |                |   |
| 566h | What was discussed at the last community meeting you attended outside your home?<br><b>Delivery care</b>                 | 1= Yes<br>2=No | — |
| 567h | What was discussed at the last community meeting you attended outside your home?<br><b>Newborn care / postnatal care</b> | 1= Yes<br>2=No | — |
| 568h | What was discussed at the last community meeting you attended outside your home?<br><b>Information about HIV/AIDS</b>    | 1= Yes<br>2=No | — |
| 569h | What was discussed at the last community meeting you attended outside your home?<br><b>Information on hygiene</b>        | 1= Yes<br>2=No | — |
| 570h | What was discussed at the last community meeting you attended outside your home?<br><b>Diarrhea treatment</b>            | 1= Yes<br>2=No | — |
| 571h | What was discussed at the last community meeting you attended outside your home?<br><b>Malaria treatment</b>             | 1= Yes<br>2=No | — |
| 572h | What was discussed at the last community meeting you attended outside your home?<br><b>Pneumonia treatment</b>           | 1= Yes<br>2=No | — |
| 573h | What was discussed at the last community meeting you attended outside your home?<br><b>Promotion of latrine use</b>      | 1= Yes<br>2=No | — |
| 574h | What was discussed at the last community meeting you attended outside your home?<br><b>Promotion of safe water use</b>   | 1= Yes<br>2=No | — |

| <b>Section 3.4: Identification of child &amp; general questions</b>                               |                                                                                      |                                                            |       |
|---------------------------------------------------------------------------------------------------|--------------------------------------------------------------------------------------|------------------------------------------------------------|-------|
| <i>The following questions are to be asked for all under 5 years old. Start with the youngest</i> |                                                                                      |                                                            |       |
| 575h                                                                                              | <b>Interviewer:</b> What is the name of the youngest child?                          | Check household listing                                    | _____ |
| 576h                                                                                              | <b>Interviewer:</b> select ID of the child from household listing                    |                                                            | _____ |
| 577h                                                                                              | Did you ever breastfeed [name]? OR Was [name] breastfed?                             | 1=Yes<br>2=No<br>9=Don't know                              | ___   |
| 578h                                                                                              | Are you still breastfeeding [name]? OR Is [name] still being breastfed?              | 1=Yes<br>2=No<br>9=Don't know                              | ___   |
| 579h                                                                                              | For how many months did you breastfeed? OR For how many months was [name] breastfed? | Record number of months. If don't know record 98           | ___   |
| 580h                                                                                              | Did [name] receive a vitamin A dose (like this) during the last 6 months?            | Show ampule/capsule/syrup<br>1=Yes<br>2=No<br>9=Don't know | ___   |

| <b>Section 3.5: Immunizations</b>                                                                                          |                                                                                        |                                                                                            |                                           |
|----------------------------------------------------------------------------------------------------------------------------|----------------------------------------------------------------------------------------|--------------------------------------------------------------------------------------------|-------------------------------------------|
| 581h                                                                                                                       | Do you have a card where [name's] vaccinations are written down? If Yes, may I see it? | 1=Yes seen <b>SKIP TO 583</b><br>2=Yes Not seen <b>SKIP TO 599</b><br>3=No<br>9=Don't know | ___                                       |
| 582h                                                                                                                       | If No card, did you ever have a vaccination card?                                      | 1=Yes<br>2=No<br>9=Don't know                                                              | ___<br>If ALL answered <b>SKIP TO 599</b> |
| <i>Record 44 in the DAY column if card shows that a vaccination was given but No date is recorded.) Record DD/MM/YYYY.</i> |                                                                                        |                                                                                            |                                           |
| 583h                                                                                                                       | Copy vaccination date for <b>BCG</b> from the card                                     | ___/___/_____                                                                              |                                           |
| 584h                                                                                                                       | Copy vaccination date for <b>Polio 0 (Polio given at birth)</b> from the card          | ___/___/_____                                                                              |                                           |
| 585h                                                                                                                       | Copy vaccination date for <b>Polio 1</b> from the card                                 | ___/___/_____                                                                              |                                           |
| 586h                                                                                                                       | Copy vaccination date for <b>Polio 2</b> from the card                                 | ___/___/_____                                                                              |                                           |
| 587h                                                                                                                       | Copy vaccination date for <b>Polio 3</b> from the card                                 | ___/___/_____                                                                              |                                           |
| 588h                                                                                                                       | Copy vaccination date for <b>Pentavalent (DPT, HIV, Hep B)</b> from the card           | ___/___/_____                                                                              |                                           |
| 589h                                                                                                                       | Copy vaccination date for <b>Pentavalent 2</b> from the card                           | ___/___/_____                                                                              |                                           |
| 590h                                                                                                                       | Copy vaccination date for <b>Pentavalent 3</b> from the card                           | ___/___/_____                                                                              |                                           |
| 591h                                                                                                                       | Copy vaccination date for <b>PCV 1</b> from the card                                   | ___/___/_____                                                                              |                                           |

|                                                                                                  |                                                                                                                                     |                               |                                                                                                      |
|--------------------------------------------------------------------------------------------------|-------------------------------------------------------------------------------------------------------------------------------------|-------------------------------|------------------------------------------------------------------------------------------------------|
| 592h                                                                                             | Copy vaccination date for <b>PCV 2</b> from the card                                                                                | ___/___/_____                 |                                                                                                      |
| 593                                                                                              | Copy vaccination date for <b>Rota 1</b> from the card                                                                               | ___/___/_____                 |                                                                                                      |
| 594                                                                                              | Copy vaccination date for <b>Rota 2</b> from the card                                                                               | ___/___/_____                 |                                                                                                      |
| 595                                                                                              | Copy vaccination date for <b>Rota 3</b> from the card                                                                               | ___/___/_____                 |                                                                                                      |
| 596                                                                                              | Copy vaccination date for <b>Measles</b> from the card                                                                              | ___/___/_____                 |                                                                                                      |
| 597                                                                                              | Copy vaccination date for <b>Vitamin A</b> from the card                                                                            | ___/___/_____                 |                                                                                                      |
| 598                                                                                              | Copy vaccination date for <b>Deworming</b> from the card                                                                            | ___/___/_____                 |                                                                                                      |
| <i>Ask and fill this question, only if the vaccination status in the card is empty (583-598)</i> |                                                                                                                                     |                               |                                                                                                      |
| 599h                                                                                             | Did [name] receive any vaccinations that are not on this card, including vaccinations received in a national immunization campaign? | 1=Yes<br>2=No<br>9=Don't know | <i>Record Yes only if respondent mentions BCG, Polio 0-3, Pentavalent, and/or measles vaccine(s)</i> |
| 600h                                                                                             | Did [name] receive <b>BCG</b> ?                                                                                                     | 1=Yes<br>2=No<br>9=Don't know | —                                                                                                    |
| 601h                                                                                             | Did [name] receive <b>Polio 0 (Polio given at birth)</b> ?                                                                          | 1=Yes<br>2=No<br>9=Don't know | —                                                                                                    |
| 602h                                                                                             | Did [name] receive <b>Polio 1</b> ?                                                                                                 | 1=Yes<br>2=No<br>9=Don't know | —                                                                                                    |
| 603h                                                                                             | Did [name] receive <b>Polio 2</b> ?                                                                                                 | 1=Yes<br>2=No<br>9=Don't know | —                                                                                                    |
| 604h                                                                                             | Did [name] receive <b>Polio 3</b> ?                                                                                                 | 1=Yes<br>2=No<br>9=Don't know | —                                                                                                    |
| 605h                                                                                             | Did [name] receive <b>Pentavalent (DPT, HIV, Hep B)</b> ?                                                                           | 1=Yes<br>2=No<br>9=Don't know | —                                                                                                    |
| 606h                                                                                             | Did [name] receive <b>Pentavalent 2</b> ?                                                                                           | 1=Yes<br>2=No<br>9=Don't know | —                                                                                                    |
| 607h                                                                                             | Did [name] receive <b>Pentavalent 3</b> ?                                                                                           | 1=Yes<br>2=No<br>9=Don't know | —                                                                                                    |
| 608h                                                                                             | Did [name] receive <b>PCV 1</b> ?                                                                                                   | 1=Yes<br>2=No<br>9=Don't know | —                                                                                                    |
| 609h                                                                                             | Did [name] receive <b>PCV 2</b> ?                                                                                                   | 1=Yes<br>2=No<br>9=Don't know | —                                                                                                    |
| 610h                                                                                             | Did [name] receive <b>Rota 1</b> ?                                                                                                  | 1=Yes<br>2=No<br>9=Don't know | —                                                                                                    |

|                                                                             |                                                                                                                                                        |                                                                 |   |
|-----------------------------------------------------------------------------|--------------------------------------------------------------------------------------------------------------------------------------------------------|-----------------------------------------------------------------|---|
| 611h                                                                        | Copy vaccination date for <b>Rota 2</b> ?                                                                                                              | 1=Yes<br>2=No<br>9=Don't know                                   | — |
| 612h                                                                        | Did [name] receive <b>Rota 3</b> ?                                                                                                                     | 1=Yes<br>2=No<br>9=Don't know                                   | — |
| 613h                                                                        | Did [name] receive <b>Measles</b> ?                                                                                                                    | 1=Yes<br>2=No<br>9=Don't know                                   | — |
| 614h                                                                        | Did [name] receive <b>Vitamin A</b> ?                                                                                                                  | 1=Yes<br>2=No<br>9=Don't know                                   | — |
| 615h                                                                        | Did [name] receive <b>Deworming</b> ?                                                                                                                  | 1=Yes<br>2=No<br>9=Don't know                                   | — |
| 616h                                                                        | Did [name] ever receive any vaccinations to prevent him/her getting diseases, including vaccinations received in a national immunization day campaign? | 1=Yes<br>2=No<br>9=Don't know                                   | — |
| <b>Please tell me if [name] received any of the following vaccinations:</b> |                                                                                                                                                        |                                                                 |   |
| 617h                                                                        | A BCG vaccination against tuberculosis, that is an injection in the arm or shoulder that usually causes a scar?                                        | 1=Yes<br>2=No<br>9=Don't know                                   | — |
| 618h                                                                        | A POLIO vaccination, that is drops in the mouth?                                                                                                       | 1=Yes<br>2=No<br>9=Don't know                                   | — |
| 619h                                                                        | When was the first polio vaccine received, just after birth or later?                                                                                  | 1=just after birth<br>2=later                                   | — |
| 620h                                                                        | How many times was the polio vaccine received?                                                                                                         | Record number.<br>9=don't know                                  | — |
| 621h                                                                        | A PENTAVALENT vaccination, which is an injection given in the thigh or buttocks, sometimes at the same time as the polio drops?                        | 1=Yes<br>2=No<br>9=Don't know                                   | — |
| 622h                                                                        | How many times was pentavalent received?                                                                                                               | Record number.<br>9=don't know                                  | — |
| 623h                                                                        | An injection to prevent MEASLES, usually in the upper left arm?                                                                                        | 1=Yes<br>2=No<br>9=Don't know                                   | — |
| 624h                                                                        | Has [name] had any illness at any time in the last 2 weeks?                                                                                            | 1=Yes<br>2=No <b>Go to 718</b><br>9=Don't know <b>Go to 718</b> | — |

| <b>Section 3.6: Two-Week Morbidity Module (symptoms, care seeking and drugs)</b>                                                                           |                                                                                                                              |                                                            |   |
|------------------------------------------------------------------------------------------------------------------------------------------------------------|------------------------------------------------------------------------------------------------------------------------------|------------------------------------------------------------|---|
| <b>FILL IN THE MODULE BELOW IF THE CHILD WAS ILL IN THE PREVIOUS TWO WEEKS. IF THE CHILD HAD MORE THAN ONE EPISODE, CONSIDER ONLY THE MOST RECENT ONE.</b> |                                                                                                                              |                                                            |   |
| 625h                                                                                                                                                       | For how many days was [name] ill?                                                                                            | <i>If less than one day record 00<br/>99 if don't know</i> | — |
| 626h                                                                                                                                                       | Is [name] ill Now?                                                                                                           | 1=Yes<br>2=No                                              | — |
| <b>Symptoms</b>                                                                                                                                            |                                                                                                                              |                                                            |   |
| 627h                                                                                                                                                       | Did [name] have any of the following at any time in the last 2 weeks? <b>Convulsions</b>                                     | 1=Yes<br>2=No                                              | — |
| 628h                                                                                                                                                       | Did [name] have any of the following at any time in the last 2 weeks? <b>Very sleepy</b>                                     | 1=Yes<br>2=No                                              | — |
| 629h                                                                                                                                                       | Did [name] have any of the following at any time in the last 2 weeks? <b>Vomiting everything</b>                             | 1=Yes<br>2=No                                              | — |
| 630h                                                                                                                                                       | Did [name] have any of the following at any time in the last 2 weeks? <b>Drinking poorly/Not able to drink or breastfeed</b> | 1=Yes<br>2=No                                              | — |
| 631h                                                                                                                                                       | Did [name] have any of the following at any time in the last 2 weeks? <b>Fever</b>                                           | 1=Yes<br>2=No                                              | — |
| 632h                                                                                                                                                       | Did [name] have any of the following at any time in the last 2 weeks? <b>Cough</b>                                           | 1=Yes<br>2=No                                              | — |
| 633h                                                                                                                                                       | Did [name] have any of the following at any time in the last 2 weeks? <b>Difficult breathing</b>                             | 1=Yes<br>2=No                                              | — |
| 634h                                                                                                                                                       | Did [name] have any of the following at any time in the last 2 weeks? <b>Diarrhea</b>                                        | 1=Yes<br>2=No                                              | — |
| 635h                                                                                                                                                       | Did [name] have any of the following at any time in the last 2 weeks? <b>Ear pain</b>                                        | 1=Yes<br>2=No                                              | — |
| 636h                                                                                                                                                       | Did [name] have any of the following at any time in the last 2 weeks? <b>Loss of appetite</b>                                | 1=Yes<br>2=No                                              | — |
| 637h                                                                                                                                                       | Did [name] have any of the following at any time in the last 2 weeks? <b>Blocked or runny Nose</b>                           | 1=Yes<br>2=No                                              | — |
| 638h                                                                                                                                                       | Did [name] have any of the following at any time in the last 2 weeks? <b>Fast breathing</b>                                  | 1=Yes<br>2=No                                              | — |
| 639h                                                                                                                                                       | Did [name] have any of the following at any time in the last 2 weeks? <b>Eye problems</b>                                    | 1=Yes<br>2=No                                              | — |
| 640h                                                                                                                                                       | Did [name] have any of the following at any time in the last 2 weeks? <b>Generalized rash</b>                                | 1=Yes<br>2=No                                              | — |
| 641h                                                                                                                                                       | Did [name] have any of the following at any time in the last 2 weeks? <b>Other signs/symptoms</b>                            | 1=Yes<br>2=No                                              | — |
| 642h                                                                                                                                                       | How many days ago did this start                                                                                             | <i>If less than one day record 00<br/>99 if don't know</i> | — |
| <b>If symptoms Fast Breathing or Difficult Breathing were selected ask the following question:</b>                                                         |                                                                                                                              |                                                            |   |
| 643h                                                                                                                                                       | Were symptoms of fast or difficult breathing due to problem in the chest or to a blocked Nose?                               | 1=Chest<br>2=Nose<br>3=Both                                | — |

|                                                              |                                                                                                                                                                                                                                                                    |                                                                                                    |   |
|--------------------------------------------------------------|--------------------------------------------------------------------------------------------------------------------------------------------------------------------------------------------------------------------------------------------------------------------|----------------------------------------------------------------------------------------------------|---|
|                                                              |                                                                                                                                                                                                                                                                    | 8= Other<br>9=Don't know                                                                           |   |
| <i>If Diarrhea was selected ask the following questions:</i> |                                                                                                                                                                                                                                                                    |                                                                                                    |   |
| 644h                                                         | When [name] was sick with diarrhea, how many watery stools did [name] have?                                                                                                                                                                                        | If less than one day record 00<br>99 if don't know                                                 | — |
| 645h                                                         | During the diarrhea, did [name] have?<br><b>Repeated vomiting</b>                                                                                                                                                                                                  | 1=Yes<br>2=No                                                                                      | — |
| 646h                                                         | During the diarrhea, did [name] have?<br><b>Marked thirst</b>                                                                                                                                                                                                      | 1=Yes<br>2=No                                                                                      | — |
| 647h                                                         | During the diarrhea, did [name] have?<br><b>Not eating/drinking well</b>                                                                                                                                                                                           | 1=Yes<br>2=No                                                                                      | — |
| 648h                                                         | During the diarrhea, did [name] have?<br><b>Blood in the stool</b>                                                                                                                                                                                                 | 1=Yes<br>2=No                                                                                      | — |
| 649h                                                         | During the diarrhea, did [name] have?<br><b>Not getting better/getting sicker</b>                                                                                                                                                                                  | 1=Yes<br>2=No                                                                                      | — |
| 650h                                                         | Now I would like to know how much [name] was offered to drink during the diarrhoea. Was he/she given less to drink than usual, more than usual, or about the same amount? If less, probe: was he/she given <i>much less than usual to drink or somewhat less</i> . | 1=Much less<br>2=Somewhat less<br>3=About the same<br>4=More<br>5=Nothing to drink<br>9=Don't know | — |
| 651h                                                         | When [name] had diarrhea, was he/she given less to eat than usual, more than usual, or about the same amount? If less, probe: was he/she given <i>much less than usual to eat or somewhat less</i> .                                                               | 1=Much less<br>2=Somewhat less<br>3=About the same<br>4=More<br>5=Nothing to drink<br>9=Don't know | — |
| <b>Care seeking</b>                                          |                                                                                                                                                                                                                                                                    |                                                                                                    |   |
| 652h                                                         | Did you seek advice or treatment for [name]'s illness from any source?                                                                                                                                                                                             | 1= Yes <b>SKIP TO 660</b><br>2= No <b>SKIP TO 664</b><br>9=Don't know                              | — |
| 653h                                                         | Why did you Not seek advice or treatment from any source? <b>Health facility too far</b>                                                                                                                                                                           | 1= Yes <b>SKIP TO 718</b><br>2= No                                                                 | — |
| 654h                                                         | Why did you Not seek advice or treatment from any source? <b>Had no time</b>                                                                                                                                                                                       | 1= Yes <b>SKIP TO 718</b><br>2= No                                                                 | — |
| 655h                                                         | Why did you Not seek advice or treatment from any source? <b>Had no money</b>                                                                                                                                                                                      | 1= Yes <b>SKIP TO 718</b><br>2= No                                                                 | — |
| 656h                                                         | Why did you Not seek advice or treatment from any source? <b>Did Not want to attend a health facility</b>                                                                                                                                                          | 1= Yes <b>SKIP TO 718</b><br>2= No                                                                 | — |
| 657h                                                         | Why did you Not seek advice or treatment from any source? <b>Could manage at home</b>                                                                                                                                                                              | 1= Yes <b>SKIP TO 718</b><br>2= No                                                                 | — |
| 658h                                                         | Why did you Not seek advice or treatment from any source? <b>Spouse did Not allow</b>                                                                                                                                                                              | 1= Yes <b>SKIP TO 718</b><br>2= No                                                                 | — |
| 659h                                                         | Why did you Not seek advice or treatment from any source? <b>Other</b>                                                                                                                                                                                             | 1= Yes <b>SKIP TO 718</b><br>2= No                                                                 | — |
| 660h                                                         | Where did you seek advice or treatment? Anywhere else? <b>Health Post</b>                                                                                                                                                                                          | 1= Yes<br>2= No                                                                                    | — |
| 661h                                                         | Where did you seek advice or treatment? Anywhere else? <b>Health Centre</b>                                                                                                                                                                                        | 1= Yes<br>2= No                                                                                    | — |

|      |                                                                                                       |                                                                                                     |       |
|------|-------------------------------------------------------------------------------------------------------|-----------------------------------------------------------------------------------------------------|-------|
| 662h | Where did you seek advice or treatment?<br>Anywhere else? <b>Hospital</b>                             | 1= Yes<br>2= No                                                                                     | —     |
| 663h | Where did you seek advice or treatment?<br>Anywhere else? <b>Other</b>                                | Specify                                                                                             | _____ |
| 664h | <b>Interviewer:</b> Check was treatment sought at two or more places?                                 | 1=Yes<br>2=No <b>SKIP TO 665</b>                                                                    | —     |
| 665h | Where did you first seek treatment?                                                                   | 1=Health Post<br>2=Health Centre<br>3=Hospital<br>8=Other                                           | —     |
| 666h | How many days after the illness began did you first seek treatment for [name]?                        | <i>If same day record 00. If don't know record 99.</i>                                              | _____ |
| 667h | Did the health worker ask you to bring [name] back to be seen again?                                  | 1=Yes<br>2=No<br>9=Don't know <b>SKIP TO 670</b>                                                    | —     |
| 668h | When did he/she say that [name] should be brought back?                                               | 1=Before today's date<br>2=After today's date <b>SKIP TO 670</b><br>9=Don't know <b>SKIP TO 670</b> | —     |
| 669h | Did you take [name] back?                                                                             | 1=Yes<br>2=No<br>9=Don't know                                                                       | —     |
| 670h | Has [name] been hospitalized for this illness?                                                        | 1=Yes<br>2=No <b>SKIP TO 672</b><br>9=Don't know <b>SKIP TO 672</b>                                 | —     |
| 671h | How many nights has [name] been hospitalized during this illness?                                     | <i>Record number of nights. If don't know record 99.</i>                                            | _____ |
| 672h | Has [name] been hospitalized at any time in the last 3 months?                                        | 1=Yes<br>2=No<br>9=Don't know                                                                       | —     |
| 673h | How many nights has [name] been hospitalized in the last three months?                                | <i>Record number of nights. If don't know record 99.</i>                                            | _____ |
| 674h | At any time during this illness, did [name] have blood taken from his/her finger or heel for testing? | 1=Yes<br>2=No <b>SKIP TO 678</b><br>9=Don't know <b>SKIP TO 678</b>                                 | —     |
| 675h | Which test was done?                                                                                  | 1=Microscopy<br>2=RDT<br>9=Don't know                                                               | —     |
| 676h | Where was the test done?                                                                              | 1=Health Post<br>2=Health Centre<br>3=Hospital<br>8=Other                                           | —     |
| 677h | Was the test positive for malaria?                                                                    | 1=Yes<br>2=No<br>9=Don't know                                                                       | —     |
| 678h | In addition, did you seek advice from any of the following? <b>Traditional birth attendants</b>       | 1=Yes<br>2=No                                                                                       | —     |
| 679h | In addition, did you seek advice from any of the following? <b>Religious leader</b>                   | 1=Yes<br>2=No                                                                                       | —     |
| 680h | In addition, did you seek advice from any of the following? <b>Pharmacy</b>                           | 1=Yes<br>2=No                                                                                       | —     |
| 681h | In addition, did you seek advice from any of                                                          | 1=Yes<br>2=No                                                                                       | —     |



|      |                                                                                       |                |       |
|------|---------------------------------------------------------------------------------------|----------------|-------|
|      | the following? <b>Traditional drug seller</b>                                         |                |       |
| 682h | In addition, did you seek advice from any of the following? <b>Relative or friend</b> | 1=Yes<br>2=No  | —     |
| 683h | In addition, did you seek advice from any of the following? <b>Other</b>              | <b>Specify</b> | _____ |

| <b>Drugs</b> |                                                                                                                                                 |                                                                                                                             |                                          |
|--------------|-------------------------------------------------------------------------------------------------------------------------------------------------|-----------------------------------------------------------------------------------------------------------------------------|------------------------------------------|
| 684h         | At any time during the illness, was [name] prescribed any drugs for the illness?                                                                | 1=Yes<br>2=No<br>9=Don't know                                                                                               | <b>SKIP TO 718</b><br><b>SKIP TO 718</b> |
| 685h_a       | What drugs did [name] take? <b>Antimalarial tablet (Co-artem, Chloroquine, etc)</b>                                                             | 1= Yes<br>2 = No                                                                                                            | —                                        |
| 685h_b       | How long after the illness started did [name] first take <b>Antimalarial tablet</b> ?                                                           | Write number of days. If child did Not take drug write 0 If 7 days or more write 7.<br>If don't know write 9                | —                                        |
| 685h_c       | <b>Did [name] complete taking the Antimalarial tablet?</b>                                                                                      | 1= Yes<br>2 = No                                                                                                            | —                                        |
| 685h_d       | <b>Did you have [Antimalarial tablet] at home or did you get it from somewhere else.</b><br><br><i>If somewhere else, probe for the source.</i> | 1=Home<br>2=Public health facility<br>3=Private health facility<br>4=HEW<br>5=Shop<br>8=Other Specify _____<br>9=Don't know | —                                        |
| 694h_a       | What drugs did [name] take?<br><b>Amoxicillin</b>                                                                                               | 1= Yes<br>2 = No                                                                                                            | —                                        |
| 694h_b       | How long after the illness started did [name] first take <b>Amoxicillin</b> ?                                                                   | Write number of days. If child did Not take drug write 0. If 7 days or more write 7.<br>If don't know write 9               | —                                        |
| 694h_c       | Did [name] complete taking the <b>Amoxicillin</b> ?                                                                                             | 1= Yes<br>2 = No                                                                                                            | —                                        |
| 694h_d       | Did you have <b>Amoxicillin</b> at home or did you get it from somewhere else.<br><br><i>If somewhere else, probe for the source.</i>           | 1=Home<br>2=Public health facility<br>3=Private health facility<br>4=HEW<br>5=Shop<br>8=Other Specify _____<br>9=Don't know | —                                        |
| 695h_a       | What drugs did [name] take?<br><b>Erythromycin</b>                                                                                              | 1= Yes<br>2 = No                                                                                                            | —                                        |
| 695h_b       | How long after the illness started did [name] first take <b>Erythromycin</b> ?                                                                  | Write number of days. If child did Not take drug write 0. If 7 days or more write 7. If don't know write 9                  | —                                        |
| 695h_c       | Did [name] complete taking the <b>Erythromycin</b> ?                                                                                            | 1= Yes<br>2 = No                                                                                                            | —                                        |
| 695h_d       | Did you have <b>Erythromycin</b> at home or did you get it from somewhere else?<br><br><i>If somewhere else, probe for the source.</i>          | 1=Home<br>2=Public health facility<br>3=Private health facility<br>4=HEW<br>5=Shop<br>8=Other Specify _____                 | —                                        |

|        |                                                                                                                                                            |                                                                                                                             |   |
|--------|------------------------------------------------------------------------------------------------------------------------------------------------------------|-----------------------------------------------------------------------------------------------------------------------------|---|
|        |                                                                                                                                                            | 9=Don't know                                                                                                                |   |
| 696h_a | What drugs did [name] take?<br><b>Azithromycin</b>                                                                                                         | 1= Yes<br>2 = No                                                                                                            | — |
| 696h_b | How long after the illness started did [name] first take <b>Azithromycin</b> ?                                                                             | Write number of days. If child did Not take drug write 0. If 7 days or more write 7.<br>If don't know write 9               | — |
| 696h_c | Did [name] complete taking the <b>Azithromycin</b> ?                                                                                                       | 1= Yes<br>2 = No                                                                                                            | — |
| 696h_d | Did you have <b>Azithromycin</b> at home or did you get it from somewhere else.<br><br><i>If somewhere else, probe for the source.</i>                     | 1=Home<br>2=Public health facility<br>3=Private health facility<br>4=HEW<br>5=Shop<br>8=Other Specify _____<br>9=Don't know | — |
| 697h_a | What drugs did [name] take?<br><b>Cotrimoxazole</b>                                                                                                        | 1= Yes<br>2 = No                                                                                                            | — |
| 697h_b | How long after the illness started did [name] first take <b>Cotrimoxazole</b> ?                                                                            | Write number of days. If child did Not take drug write 0. If 7 days or more write 7.<br>If don't know write 9               | — |
| 697h_c | <b>Did [name] complete taking the Cotrimoxazole?</b>                                                                                                       | 1= Yes<br>2 = No                                                                                                            | — |
| 697h_d | Did you have <b>Cotrimoxazole</b> at home or did you get it from somewhere else.<br><br><i>If somewhere else, probe for the source.</i>                    | 1=Home<br>2=Public health facility<br>3=Private health facility<br>4=HEW<br>5=Shop<br>8=Other Specify _____<br>9=Don't know | — |
| 698h_a | What drugs did [name] take?<br><b>Other antibiotic (pill or syrup)</b>                                                                                     | 1= Yes<br>2 = No                                                                                                            | — |
| 698h_b | How long after the illness started did [name] first take <b>other antibiotic (pill or syrup)?</b>                                                          | Write number of days. If child did Not take drug write 0. If 7 days or more write 7.<br>If don't know write 9               | — |
| 698h_c | Did [name] complete taking <b>other antibiotic (pill or syrup)?</b>                                                                                        | 1= Yes<br>2 = No                                                                                                            | — |
| 698h_d | Did you have <b>other antibiotic (pill or syrup)</b> at home or did you get it from somewhere else.<br><br><i>If somewhere else, probe for the source.</i> | 1=Home<br>2=Public health facility<br>3=Private health facility<br>4=HEW<br>5=Shop<br>8=Other Specify _____<br>9=Don't know | — |
| 699h_a | What drugs did [name] take?<br><b>Antibiotic injection</b>                                                                                                 | 1= Yes<br>2 = No                                                                                                            | — |
| 699h_b | How long after the illness started did [name] first take <b>antibiotic injection</b> ?                                                                     | Write number of days. If child did Not take drug write 0. If 7 days or more write 7.<br>If don't know write 9               | — |
| 699h_c | Did [name] complete taking <b>antibiotic injection</b> ?                                                                                                   | 1= Yes<br>2 = No                                                                                                            | — |
| 699h_d | Did you have <b>antibiotic injection</b> at home or did you get it from somewhere else.                                                                    | 1=Home<br>2=Public health facility<br>3=Private health facility                                                             |   |

|        |                                                                                                                            |                                                                                                            |   |
|--------|----------------------------------------------------------------------------------------------------------------------------|------------------------------------------------------------------------------------------------------------|---|
|        | <i>If somewhere else, probe for the source.</i>                                                                            | 4=HEW<br>5=Shop<br>8=Other Specify _____<br>9=Don't know                                                   | — |
| 700h_a | What drugs did [name] take?<br><b>Zinc</b>                                                                                 | 1= Yes<br>2 = No                                                                                           | — |
| 700h_b | How long after the illness started did [name] first take <b>Zinc</b> ?                                                     | Write number of days. If child did Not take drug write 0. If 7 days or more write 7. If don't know write 9 | — |
| 700h_c | Did [name] complete taking the <b>Zinc</b> ?                                                                               | 1= Yes<br>2 = No                                                                                           | — |
| 700h_d | Did you have <b>Zinc</b> at home or did you get it from somewhere else.<br><i>If somewhere else, probe for the source.</i> | Write number of days. If child did Not take drug write 0. If 7 days or more write 7. If don't know write 9 | — |
| 701h_a | What drugs did [name] take?<br><b>Fluid made from special packet called ORS</b>                                            | 1= Yes<br>2 = No                                                                                           | — |
| 701h_b | How long after the illness started did [name] first take <b>fluid made from special packet called ORS</b> ?                | Write number of days. If child did Not take drug write 0. If 7 days or more write 7. If don't know write 9 | — |
| 702h_a | What drugs did [name] take?<br><b>ORS-Zinc combined</b>                                                                    | 1= Yes<br>2 = No                                                                                           | — |
| 702h_b | How long after the illness started did [name] first take <b>ORS-Zinc combined</b> ?                                        | Write number of days. If child did Not take drug write 0. If 7 days or more write 7. If don't know write 9 | — |
| 704h_a | What drugs did [name] take?<br><b>Gov. recommended home mad fluid</b>                                                      | 1= Yes<br>2 = No                                                                                           | — |
| 704h_b | How long after the illness started did [name] first take <b>Gov. recommended home mad fluid</b> ?                          | Write number of days. If child did Not take drug write 0. If 7 days or more write 7. If don't know write 9 | — |
| 705h_a | What drugs did [name] take?<br><b>Pill or Syrup</b>                                                                        | 1= Yes<br>2 = No                                                                                           | — |
| 705h_b | How long after the illness started did [name] first take <b>Pill or Syrup</b> ?                                            | Write number of days. If child did Not take drug write 0. If 7 days or more write 7. If don't know write 9 | — |
| 706h_a | What drugs did [name] take?<br><b>Injection</b>                                                                            | 1= Yes<br>2 = No                                                                                           | — |
| 706h_b | How long after the illness started did [name] first take <b>Injection</b> ?                                                | Write number of days. If child did Not take drug write 0. If 7 days or more write 7. If don't know write 9 | — |
| 707h_a | What drugs did [name] take?<br><b>IV intravenous</b>                                                                       | 1= Yes<br>2 = No                                                                                           | — |
| 707h_b | How long after the illness started did [name] first take <b>IV intravenous</b> ?                                           | Write number of days. If child did Not take drug write 0. If 7 days or more write 7. If don't know write 9 | — |
| 708h_a | What drugs did [name] take?<br><b>Home remedies/herbal medicine</b>                                                        | 1= Yes<br>2 = No                                                                                           | — |
| 708h_b | How long after the illness started did [name] first take <b>home remedies/herbal medicine</b> ?                            | Write number of days. If child did Not take drug write 0. If 7 days or more write 7. If don't know write 9 | — |
| 709h_a | What drugs did [name] take?<br><b>Paracetamol</b>                                                                          | 1= Yes<br>2 = No                                                                                           | — |
| 709h_b | How long after the illness started did [name]                                                                              | Write number of days. If child did Not take drug                                                           | — |

|                          |                                                                              |                                                                                                               |     |
|--------------------------|------------------------------------------------------------------------------|---------------------------------------------------------------------------------------------------------------|-----|
|                          | first take <b>Paracetamol</b> ?                                              | write 0. If 7 days or more write 7.<br>If don't know write 9                                                  |     |
| 710h_a                   | What drugs did [name] take?<br><b>Panadol</b>                                | 1= Yes<br>2 = No                                                                                              | —   |
| 710h_b                   | How long after the illness started did [name] first take <b>Panadol</b> ?    | Write number of days. If child did Not take drug write 0. If 7 days or more write 7.<br>If don't know write 9 | —   |
| 711h_a                   | What drugs did [name] take?<br><b>Aspirin</b>                                | 1= Yes<br>2 = No                                                                                              | —   |
| 711h_b                   | How long after the illness started did [name] first take <b>Aspirin</b> ?    | Write number of days. If child did Not take drug write 0. If 7 days or more write 7.<br>If don't know write 9 | —   |
| 712h_a                   | What drugs did [name] take?<br><b>Ibuprofen</b>                              | 1= Yes<br>2 = No                                                                                              | —   |
| 712h_b                   | How long after the illness started did [name] first take <b>Ibuprofen</b> ?  | Write number of days. If child did Not take drug write 0. If 7 days or more write 7.<br>If don't know write 9 | —   |
| 713h_a                   | What <b>other</b> drugs did [name] take?<br><b>Other</b>                     | Specify                                                                                                       | —   |
| 713h_b                   | How long after the illness started did [name] first take <b>other drug</b> ? | Write number of days. If child did Not take drug write 0. If 7 days or more write 7.<br>If don't know write 9 | —   |
| 714h                     | What <b>other</b> drugs did [name] take?<br><b>Don't know</b>                | 1= Yes<br>2 = No                                                                                              | —   |
| <b>Section 3.7: MUAC</b> |                                                                              |                                                                                                               |     |
| 718h                     | Mid-upper arm circumference                                                  | <i>In centimeters</i><br>9994= <i>If Not present</i><br>9995= <i>Refused</i><br>9996= <i>Other</i>            | — — |
