# Supplementary material for: Health postservice readiness and use of preventive and curative services for suspected childhood pneumonia in Ethiopia: a cross-sectional study
Source: PubMed Central journal article supplement (PMC9047705; doi:10.1136/bmjopen-2021-058055), 2022-04-26
Supplement: bmjopen-2021-058055supp002.pdf [file bmjopen-2021-058055supp002.pdf]

## ANNEX C: INSTRUMENTS FOR HEALTH PROVIDER SURVEY

## Dagu Baseline Facility Questionnaire: Health Post

## MODULE 1: BACKGROUND INFORMATION OF THE HEALTH POST

|     |                                                  |                                            |     |
|-----|--------------------------------------------------|--------------------------------------------|-----|
| 100 | Date<br>(Gregorian Calendar)                     | _ _ _  /  _ _ _  /  _ _ _ <br>dd / mm / yy |     |
| 101 | Region Code                                      | _ _ _ _ _ _ _                              |     |
| 102 | Zone Code                                        | _ _ _ _ _ _ _                              |     |
| 103 | Woreda Name                                      | _ _ _ _ _ _ _ _ _ _ _ _ _                  |     |
| 104 | Woreda code                                      | _ _ _ _ _ _ _                              |     |
| 105 | PHCU/Health Centre name                          | _ _ _ _ _ _ _ _ _ _ _ _ _                  |     |
| 106 | Kebele name                                      | _ _ _ _ _ _ _ _ _ _ _ _ _                  |     |
| 107 | Gote name                                        | _ _ _ _ _ _ _ _ _ _ _ _ _                  |     |
| 108 | Cluster code                                     | _ _ _                                      |     |
| 109 | GPS Latitude<br>Take coordinates of health post  | _ _ _  :  _ _ _ _ _ _ _ _                  |     |
| 110 | GPS Longitude<br>Take coordinates of health post | _ _ _  :  _ _ _ _ _ _ _ _                  |     |
| 111 | Interviewer Initials                             | _ _ _                                      |     |
| 112 | Did you read the HEW the consent form?           | 1 = Yes<br>2 = No                          | _ _ |
| 113 | Did the HEW agree to be interviewed?             | 1 = Yes – GO TO MODULE 2<br>2 = No         | _ _ |
| 114 | If not, why not?                                 | _ _ _ _ _ _ _ _ _ _ _ _ _                  |     |

## MODULE 2: FACILITY, EQUIPMENT, MEDICINE AND JOB AIDS

INTERVIEWER: *I would now like to ask you questions about the facility, equipment, medicine and job aids at this health post.*

WALK AROUND THE FACILITY WITH THE HEW AND PERSONALLY CHECK THE AVAILABILITY OF EQUIPMENT, AND MEDICINE IN STOCK.

*Does the facility have the following essential support services?*

|     |                                            |                                                                                                                                                                                                                                                                                                                                             |     |
|-----|--------------------------------------------|---------------------------------------------------------------------------------------------------------------------------------------------------------------------------------------------------------------------------------------------------------------------------------------------------------------------------------------------|-----|
| 115 | What is the main source of drinking water? | 1 = Piped connection into health post<br>2 = Piped connection into yard<br>3 = Public standpipes<br>4 = Boreholes<br>5 = Protected dug wells<br>6 = Protected springs<br>7 = Rainwater collection<br>8 = Surface water<br>9 = Open dug wells<br>10 = Unprotected springs<br>11 = Vendor provided water<br>12 = Bottled water<br>13 = Tanker | _ _ |
| 116 | Water supply available on day of survey    | 1 = Yes<br>2 = No                                                                                                                                                                                                                                                                                                                           | _ _ |
| 117 | Electricity connection or other power      | 1 = Yes                                                                                                                                                                                                                                                                                                                                     | _ _ |

|     |                                                                                                                                    |                                                                                                                                                     |    |
|-----|------------------------------------------------------------------------------------------------------------------------------------|-----------------------------------------------------------------------------------------------------------------------------------------------------|----|
|     | <b>sources (example, gas/solar generator)</b>                                                                                      | <b>2 = No-SKIP 119</b>                                                                                                                              |    |
| 118 | <b>Electricity supply on day of survey?</b>                                                                                        | 1 = Yes<br>2 = No                                                                                                                                   | __ |
| 119 | <b>Functional sterilizer that works on the day of the survey?</b>                                                                  | 1 = Yes<br>2 = No                                                                                                                                   | __ |
| 120 | <b>Functional fridge that works on the day of the survey?</b>                                                                      | 1 = Yes<br>2 = No                                                                                                                                   | __ |
| 121 | <b>Toilets accessible to facility users?</b>                                                                                       | 1 = Yes<br>2 = No                                                                                                                                   | __ |
| 122 | <b>Generally is there a cell phone signal at this health post?</b>                                                                 | 1 = Yes<br>2 = No                                                                                                                                   | __ |
| 123 | <b>Is it all functional today?</b><br><i>INTERVIEWER -check your phone if there is signal on day of survey</i>                     | 1 = Yes<br>2 = No                                                                                                                                   | __ |
|     | <b>Which means of communication do you have to speak to the health facility?</b>                                                   | For each:1 = Yes 2 = No                                                                                                                             |    |
|     | <b>Check all that apply</b>                                                                                                        | 124 Facility landline/mobile phone                                                                                                                  | __ |
|     |                                                                                                                                    | 125 Staff member mobile phone                                                                                                                       | __ |
|     |                                                                                                                                    | 126 Phone outside the facility                                                                                                                      | __ |
|     |                                                                                                                                    | 127 In person communication                                                                                                                         | __ |
| 128 | <b>During the last sick newborn referral from the health post to health center, did you speak to the health facility directly?</b> | 1 = Yes<br>2 = No – GO TO 130<br>3 =Don't know - GO TO 130                                                                                          | __ |
| 129 | <b>IF YES, Which means of communication did you use?</b>                                                                           | 1 = Facility landline/mobile phone<br>2 = Staff member mobile phone;<br>3 = Phone outside the facility<br>4 = Radio<br>5 = In person communication; | __ |
| 130 | <b>When referring from this health post to the health center for further care, do you use referral forms?</b>                      | 1 = Yes (NOTE: check to see if an official referral form)<br>2 = No                                                                                 | __ |
| 131 | <b>Do you receive any back referral forms on cases you have referred?</b>                                                          | 1 = Yes<br>2 = No                                                                                                                                   | __ |

| <b>Walk around the facility with the respondent and personally check the availability of medicine</b> |                                                                                           |    |      |                                                                                                                        |          |
|-------------------------------------------------------------------------------------------------------|-------------------------------------------------------------------------------------------|----|------|------------------------------------------------------------------------------------------------------------------------|----------|
|                                                                                                       | <b>Does the facility have the following medicines today?</b>                              |    |      | <b>If not available or expired, what was the duration of stock out /expiry for?</b>                                    |          |
|                                                                                                       | <i>For each:<br/>1 = Yes<br/>2 = Not available<br/>3= Expired<br/>4 = Never available</i> |    |      | <i>Check for the last three months and what was the longest number of consecutive days without that item (in days)</i> |          |
| 132                                                                                                   | Vitamin k 1 mg                                                                            | __ | 133  | Vitamin k 1 mg                                                                                                         | __ __ __ |
| 132A                                                                                                  | Vitamin k 10 mg                                                                           | __ | 132B | Vitamin k 10 mg                                                                                                        | __ __ __ |
| 134                                                                                                   | Vitamin A 200,000 IU                                                                      | __ | 135  | Vitamin A 200,000 IU                                                                                                   | __ __ __ |
| 136                                                                                                   | Vitamin A 100,000 IU                                                                      | __ | 137  | Vitamin A 100,000 IU                                                                                                   | __ __ __ |
| 138                                                                                                   | TTC eye ointment                                                                          | __ | 139  | TTC eye ointment                                                                                                       | __ __ __ |
| 140                                                                                                   | Chlorohexidine                                                                            | __ | 141  | Chlorohexidine                                                                                                         | __ __ __ |

|     |                                      |    |     |                                      |       |
|-----|--------------------------------------|----|-----|--------------------------------------|-------|
| 142 | Gentamycin 20 mg/2ml, box of 50 amp  | __ | 143 | Gentamycin 20 mg/2ml, box of 50 amp  | __ __ |
| 144 | Gentamycin 80mg/2ml                  |    | 145 | Gentamycin 80mg/2ml                  | __ __ |
| 146 | Amoxicillin suspension (125 mg/5 ml) | __ | 147 | Amoxicillin suspension (125 mg/5 ml) | __ __ |
| 148 | Amoxicillin tab 250 (dispersible)    | __ | 149 | Amoxicillin tab 250 (dispersible)    | __ __ |
| 150 | Amoxicillin tab 125 mg (dispersible) | __ | 151 | Amoxicillin tab 125 mg (dispersible) | __ __ |
| 152 | Ampicillin powder for inj, 500 mg    | __ | 153 | Ampicillin powder for inj, 500 mg    | __ __ |
| 154 | Paracetamol                          | __ | 155 | Paracetamol                          | __ __ |
| 156 | Iron                                 | __ | 157 | Iron                                 | __ __ |
| 158 | Folate                               | __ | 159 | Folate                               | __ __ |
| 160 | BCG                                  | __ | 161 | BCG                                  | __ __ |
| 162 | Polio vaccine                        | __ | 163 | Polio vaccine                        | __ __ |
| 164 | ORS                                  | __ | 165 | ORS                                  | __ __ |
| 166 | Zinc                                 | __ | 167 | Zinc                                 | __ __ |
| 168 | Zinc-ORS combined                    | __ | 169 | Zinc-ORS combined                    | __ __ |
| 170 | Malaria RDT                          | __ | 171 | Malaria RDT                          | __ __ |
| 172 | Coartem (Artemether/lumefantrine)    | __ | 173 | Coartem (Artemether/lumefantrine)    | __ __ |
| 174 | Chloroquine syrup                    | __ | 175 | Chloroquine syrup                    | __ __ |
| 176 | Artesunate suppository               | __ | 177 | Artesunate suppository               | __ __ |
| 178 | HIV diagnostic tests                 | __ | 179 | HIV diagnostic tests                 | __ __ |
| 180 | Cotrimoazole                         | __ | 181 | Cotrimoazole                         | __ __ |
| 182 | Plumpy nut                           | __ | 183 | Plumpy nut                           | __ __ |
| 184 | BP100                                | __ | 185 | BP100                                | __ __ |

|  | Does the facility have the following functional equipment today? | For each 1=yes, 2=no                     |    |
|--|------------------------------------------------------------------|------------------------------------------|----|
|  |                                                                  |                                          |    |
|  | 186                                                              | Ambu bag / face mask (full size 0 and 1) | __ |
|  | 187                                                              | Any Thermometer                          | __ |
|  | 188                                                              | Infant scale                             | __ |
|  | 189                                                              | Weighing sling                           | __ |
|  | 190                                                              | Blood pressure cuff                      | __ |
|  | 191                                                              | Stethoscope                              | __ |
|  | 192                                                              | Watch or clock                           | __ |
|  | 193                                                              | Tape measure                             | __ |
|  | 194                                                              | Examination couch                        | __ |
|  | 195                                                              | Drape                                    | __ |
|  | 196                                                              | Washable mackintosh                      | __ |
|  | 197                                                              | Dustbin                                  | __ |

|  |                                                                       |               |                                              |    |
|--|-----------------------------------------------------------------------|---------------|----------------------------------------------|----|
|  |                                                                       | 198           | Cups/drinking water                          | __ |
|  |                                                                       | 199           | Sharps container                             | __ |
|  |                                                                       | 200           | Chlorine bleach                              | __ |
|  |                                                                       | 201           | Bucket for decontamination solution          | __ |
|  |                                                                       | 202           | Contaminated waste container                 | __ |
|  |                                                                       | 203           | Soap and towel or handrub                    | __ |
|  |                                                                       | 204           | Alcohol-based hand rub                       | __ |
|  |                                                                       | 205           | Clean glove                                  | __ |
|  |                                                                       | 206           | Syringe with needle for Gentamycin injection | __ |
|  |                                                                       | 207           | MUAC tape measure                            | __ |
|  | <b>Does the facility have the following job aids and forms today?</b> |               | <i>For each 1=yes, 2=no</i>                  |    |
|  |                                                                       | 208           | Pregnant woman registration book             | __ |
|  |                                                                       | 209           | ANC Register                                 | __ |
|  |                                                                       | 210           | Delivery Register                            | __ |
|  |                                                                       | 211           | PNC Register                                 | __ |
|  |                                                                       | 212           | ICCM registration book for 0- under 2 months | __ |
|  |                                                                       | 213           | ICCM registration book 2 -59 months          | __ |
|  |                                                                       | 214           | Family health cards                          | __ |
|  |                                                                       | 215           | Vaccination cards                            | __ |
|  |                                                                       | 216           | Family folder                                | __ |
|  |                                                                       | 217           | Stock card/bin card                          | __ |
|  |                                                                       | 218           | HMIS forms (monthly and quarterly reporting) | __ |
|  |                                                                       | 219           | Request and re-supply form                   | __ |
|  | 220                                                                   | Chart booklet | __                                           |    |

### MODULE 3: HEALTH POST REGISTER REVIEW BY THE DATA COLLECTOR

PLEASE LOOK AT THE SPECIFIED HEW REGISTERS DETAILED BELOW FOR THE DIFFERENT DATA ELEMENTS. WRITE 9999, 999 OR 99 IF NOT AVAILABLE.

*I would now like to take a look at your registers to abstract information about the community in this kebele and the services provided them. I will ask about the population profile for the last 12 months and services provided by you for the last three months from \_\_\_\_\_ to \_\_\_\_\_.*

|     |                                                                                                                     |         |
|-----|---------------------------------------------------------------------------------------------------------------------|---------|
|     | <b>Obtain data on population FOR THE YEAR from the day of survey from Health Post wall records</b>                  |         |
| 221 | Number of people in the kebele                                                                                      | _ _ _ _ |
| 222 | Number of households in the kebele                                                                                  | _ _ _ _ |
| 223 | Total number of women of reproductive age                                                                           | _ _ _ _ |
| 224 | Total number of under 5 children in the kebele                                                                      | _ _ _ _ |
|     | <b>Obtain data on expected number of pregnancies and births from the PAST QUARTER from Health Post wall records</b> |         |
| 225 | Expected number pregnancies                                                                                         | _ _ _ _ |
| 226 | Expected number of births                                                                                           | _ _ _ _ |

|     |                                                                                                                                                                                               |         |
|-----|-----------------------------------------------------------------------------------------------------------------------------------------------------------------------------------------------|---------|
| 227 | Expected number of facility births                                                                                                                                                            | _ _ _ _ |
|     | <b>Obtain data from ANC registers for the PAST QUARTER</b>                                                                                                                                    |         |
| 228 | Number of women receiving 1 visit                                                                                                                                                             | _ _ _   |
| 229 | Number of women receiving 2 visits                                                                                                                                                            | _ _ _   |
| 230 | Number of women receiving 3 visits                                                                                                                                                            | _ _ _   |
| 231 | Number of women receiving 4 visits                                                                                                                                                            | _ _ _   |
|     | <b>Obtain data from delivery registers for the PAST QUARTER</b>                                                                                                                               |         |
| 232 | Number of births attended by the HEW                                                                                                                                                          | _ _ _   |
| 233 | Number of total births (home, health post, health center, <b>hospital</b> )                                                                                                                   | _ _ _ _ |
| 234 | Number of live births                                                                                                                                                                         | _ _ _   |
| 235 | Number of newborn deaths (28 days or less)                                                                                                                                                    | _ _ _   |
|     | <b>PNC data</b>                                                                                                                                                                               |         |
| 236 | Is there a Post Natal Care register (standard or otherwise) in this health post<br>1= Yes, 2=No                                                                                               | _       |
|     | <b>If Post Natal Care register is not available but family folder is available, obtain the information from the family folder given for the PAST QUARTER. Ask the HEWs to separate those.</b> |         |
| 237 | Number receiving 1 visit                                                                                                                                                                      | _ _ _   |
| 238 | Number receiving 2 visits                                                                                                                                                                     | _ _ _   |
| 239 | Number receiving 3 visits                                                                                                                                                                     | _ _ _   |
|     | <b>If information is not available from register books on the following, enquire from the HEW where to obtain the following information for the PAST QUARTER</b>                              |         |
| 240 | Number of newborns treated for asphyxia, initial stimulation, or resuscitation by the HEW                                                                                                     | _ _ _   |
| 241 | Number of newborns given chlorohexidine cord care by the HEW                                                                                                                                  | _ _ _   |
|     | <b>Obtain data from the ICCM 2-59 month register for the PAST QUARTER</b>                                                                                                                     |         |
| 242 | Number of initial consultations with children                                                                                                                                                 | _ _ _ _ |
| 243 | Number of sick children who were referred                                                                                                                                                     | _ _ _ _ |
| 244 | Number of children classified as having pneumonia                                                                                                                                             | _ _ _ _ |
| 245 | Number of children classified as having diarrhea                                                                                                                                              | _ _ _ _ |
| 246 | Number of children classified as having malaria                                                                                                                                               | _ _ _ _ |
| 247 | Number of children who received antibiotic for pneumonia                                                                                                                                      | _ _ _ _ |
| 248 | Number of children who received ORS for diarrhea                                                                                                                                              | _ _ _ _ |
| 249 | Number of children who received zinc for diarrhea                                                                                                                                             | _ _ _ _ |
| 250 | Number of children who received zinc-ORS combined for diarrhea                                                                                                                                | _ _ _ _ |
| 251 | Number of children who received RDT for malaria                                                                                                                                               | _ _ _ _ |
| 252 | Number of children who received ACT for malaria                                                                                                                                               | _ _ _ _ |

**Obtain data from iCCM 0-2 month registration book for information below for the PAST QUARTER**  
**For each of the newborn less than 2 months old seen at the health center (recorded above) complete a separate record review.**

**Record 1**

|      |                                                                       |                                                                                           |                       |
|------|-----------------------------------------------------------------------|-------------------------------------------------------------------------------------------|-----------------------|
| 253A | How many 0-2 months were seen in the last quarter?                    | _ _ _ _                                                                                   |                       |
| 253  | <b>Name of child</b>                                                  | _____ First name                                                                          |                       |
|      |                                                                       | _____ Last name                                                                           |                       |
| 254  | <b>Address of child</b>                                               | _____ Gote name                                                                           |                       |
|      |                                                                       | _____ Keble name                                                                          |                       |
| 255  | <b>Date Seen</b>                                                      | <i>Gregorian calendar (DD/MM/YY)</i>                                                      | _ _ _ / _ _ _ / _ _ _ |
| 256  | <b>Age of baby at the time of consultation in weeks</b>               | <i>Record age of baby in weeks ranging from 1-8 weeks. If unknown 9</i>                   | _ _  weeks            |
| 257  | <b>Gender of baby</b>                                                 | 1 = Male<br>2 = Female                                                                    | _ _                   |
| 258  | <b>Weight on the day of consultation in grams</b>                     | <i>If weight is given in KGs record in grams e.g 3.5 KG = 3500 grams. If unknown 9999</i> | _ _ _ _ _ _ _  grams  |
| 259  | <b>Birth Weight (Written for those less than 7 days)</b>              | 1= < 1,500 grams<br>2= 1,500 - < 2,500 grams<br>3= >/= 2,500 grams<br>9= Unknown          | _ _                   |
| 260  | <b>Gestational Age (in weeks)</b>                                     | 1= < 32 weeks<br>2= 32 – 36 weeks<br>3= >/= 37 weeks<br>9= Unknown                        | _ _                   |
| 261  | <b>Temperature on the day of consultation in degree Celsius</b>       | <i>Record temperature to one decimal place (e.g. 34.3 °C) If unknown 99.9</i>             | _ _ _ _ . _ _  °C     |
| 262  | <b>Respiratory Rate per minute on the day of consultation</b>         | <i>If unknown 999</i>                                                                     | _ _ _ _               |
|      | <b>Signs and symptoms of the newborn at the time of consultation?</b> | For each:1 = Yes 2 = No                                                                   |                       |
|      | <b>Record all that apply</b>                                          | 263 Reduced feeding/unable to feed                                                        | _ _                   |
|      |                                                                       | 264 Convulsion                                                                            | _ _                   |
|      |                                                                       | 265 Severe Chest in-drawing                                                               | _ _                   |
|      |                                                                       | 266 Vomiting                                                                              | _ _                   |
|      |                                                                       | 267 Fever                                                                                 | _ _                   |
|      |                                                                       | 268 Diarrhea                                                                              | _ _                   |
|      |                                                                       | 269 Fast breathing                                                                        | _ _                   |
|      |                                                                       | 270 Coughing                                                                              | _ _                   |
|      |                                                                       | 271 Grunting                                                                              | _ _                   |
|      |                                                                       | 272 Skin pustules                                                                         | _ _                   |
|      |                                                                       | 273 Yellow palms and soles                                                                | _ _                   |
|      |                                                                       | 274 Yellow eyes and skin                                                                  | _ _                   |
|      |                                                                       | 275 Red umbilicus or draining pus                                                         | _ _                   |
|      |                                                                       | 276 Movement only when stimulated or no movement even when stimulated                     | _ _                   |
|      |                                                                       | 277 Movement only when stimulated or no movement even when stimulated                     | _ _                   |

|  |                                                                              |                 |                                                               |                          |
|--|------------------------------------------------------------------------------|-----------------|---------------------------------------------------------------|--------------------------|
|  |                                                                              | 278             | Bulging fontanelle                                            | <input type="checkbox"/> |
|  |                                                                              | 279             | Restless/Irritable                                            | <input type="checkbox"/> |
|  |                                                                              | 280             | Sunken eyes                                                   | <input type="checkbox"/> |
|  |                                                                              | 281             | Skin pinch goes back slowly                                   | <input type="checkbox"/> |
|  |                                                                              | 282             | Skin pinch goes back very slowly                              | <input type="checkbox"/> |
|  |                                                                              | 283             | Diarrhea lasting 14 days or more                              | <input type="checkbox"/> |
|  |                                                                              | 284             | Blood in the stool                                            | <input type="checkbox"/> |
|  |                                                                              | 285             | Not suckling well                                             | <input type="checkbox"/> |
|  |                                                                              | 286             | Less than 8 breast feeds in 24 hours                          | <input type="checkbox"/> |
|  |                                                                              | 287             | Switching to another breast before one is emptied             | <input type="checkbox"/> |
|  |                                                                              | 288             | Not breast feeding more frequently and longer during sickness | <input type="checkbox"/> |
|  |                                                                              | 289             | Poor positioning during breast feeding                        | <input type="checkbox"/> |
|  |                                                                              | 290             | Not well attached during breast feeding                       | <input type="checkbox"/> |
|  |                                                                              | 291             | Receives other foods or drinks (even water)                   | <input type="checkbox"/> |
|  |                                                                              | 292             | Low weight for age                                            | <input type="checkbox"/> |
|  |                                                                              | 293             | Thrush (ulcers or white patches in mouth)                     | <input type="checkbox"/> |
|  |                                                                              | 294             | Signs and symptoms not given                                  | <input type="checkbox"/> |
|  |                                                                              | 295             | Other – GO TO 297                                             | <input type="checkbox"/> |
|  |                                                                              | 296             | Specify _____                                                 |                          |
|  |                                                                              |                 | For each:1 = Yes 2 = No                                       |                          |
|  | <b>Disease classification of the newborn</b><br><b>Record all that apply</b> | 297             | Very Preterm and/or very low birth weight                     | <input type="checkbox"/> |
|  |                                                                              | 298             | Preterm and/or low birth weight                               | <input type="checkbox"/> |
|  |                                                                              | 299             | VSD                                                           | <input type="checkbox"/> |
|  |                                                                              | 300             | Local bacterial infection                                     | <input type="checkbox"/> |
|  |                                                                              | 301             | Severe Dehydration                                            | <input type="checkbox"/> |
|  |                                                                              | 302             | Some Dehydration                                              | <input type="checkbox"/> |
|  |                                                                              | 303             | No Dehydration                                                | <input type="checkbox"/> |
|  |                                                                              | 304             | Severe Persistent Diarrhea                                    | <input type="checkbox"/> |
|  |                                                                              | 305             | Dysentery                                                     | <input type="checkbox"/> |
|  |                                                                              | 306             | Jaundice                                                      | <input type="checkbox"/> |
|  |                                                                              | 307             | Severe Jaundice                                               | <input type="checkbox"/> |
|  |                                                                              | 308             | Malaria                                                       | <input type="checkbox"/> |
|  |                                                                              | 309             | Feeding problem or low weight                                 | <input type="checkbox"/> |
|  |                                                                              | 310             | Classification not given                                      | <input type="checkbox"/> |
|  | 311                                                                          | Other Go to 313 | <input type="checkbox"/>                                      |                          |
|  | 312                                                                          | Specify _____   |                                                               |                          |
|  |                                                                              |                 | For each:1 = Yes 2 = No                                       |                          |
|  | <b>Treatment given to the newborn</b><br><b>Record all that apply</b>        | 313             | Gentamycin IM first dose                                      | <input type="checkbox"/> |
|  |                                                                              | 314             | Gentamycin IM for seven days                                  | <input type="checkbox"/> |
|  |                                                                              | 315             | Amoxicillin suspension/dispersible first dose                 | <input type="checkbox"/> |
|  |                                                                              | 316             | Amoxicillin suspension/dispersible for 7 days                 | <input type="checkbox"/> |
|  |                                                                              | 317             | Amoxicillin suspension/dispersible for 5 days                 | <input type="checkbox"/> |
|  |                                                                              | 318             | ORS (Plan B) – Facility treatment                             | <input type="checkbox"/> |
|  |                                                                              | 319             | ORS (Plan A) – Home treatment                                 | <input type="checkbox"/> |
|  |                                                                              | 320             | Zinc for 10 days                                              | <input type="checkbox"/> |
|  |                                                                              | 321             | Zinc-ORS combined                                             | <input type="checkbox"/> |
|  |                                                                              | 322             | Oral chloroquine (Anti-malarial)                              | <input type="checkbox"/> |
|  |                                                                              | 323             | Oral quinine (Anti-malarial)                                  | <input type="checkbox"/> |
|  |                                                                              | 324             | Oral coartem (Anti-malarial)                                  | <input type="checkbox"/> |
|  |                                                                              | 325             | Rectal Artesunate (Anti-malarial)                             | <input type="checkbox"/> |
|  |                                                                              | 326             | IV Quinine (Anti-malarial)                                    | <input type="checkbox"/> |
|  |                                                                              | 327             | Other Antimalarial (specify)                                  | <input type="checkbox"/> |

|     |                                                                                              |     |                                              |    |
|-----|----------------------------------------------------------------------------------------------|-----|----------------------------------------------|----|
|     |                                                                                              | 328 | TTC (Tetracycline) eye ointment              | __ |
|     |                                                                                              | 329 | GV paint (Gentian Violet)                    | __ |
|     |                                                                                              | 330 | Nutritional Counseling                       | __ |
|     |                                                                                              | 331 | Exposing to sunshine 20– 30 minutes everyday | __ |
|     |                                                                                              | 332 | Other treatment GO TO 334                    | __ |
|     |                                                                                              | 333 | Specify _____                                |    |
| 334 | <b>Was newborn referred to a higher facility?</b>                                            |     | 1 = Yes – GO TO 337<br>2 = No                | __ |
| 335 | <b>If newborn had VSD and was treated at health post was gentamycin treatment completed?</b> |     | 1 = Yes<br>2 = No<br>3 = Not VSD case        | __ |
|     | <b>Outcome of the newborn treatment</b>                                                      |     | For each:1 = Yes 2 = No                      |    |
|     |                                                                                              | 336 | Health improved/healed                       | __ |
|     |                                                                                              | 337 | Died                                         | __ |
|     |                                                                                              | 338 | Worsened                                     | __ |
|     |                                                                                              | 339 | Same                                         | __ |
|     |                                                                                              | 340 | Unknown                                      | __ |



**Obtain data from iCCM 2-59 registration book for information below for the PAST QUARTER**  
**For the past 10 children seen at the health post (recorded above) complete a separate record review.**

**Record 1**

|         |                                                                                           |                                                                                          |                                                                   |   |
|---------|-------------------------------------------------------------------------------------------|------------------------------------------------------------------------------------------|-------------------------------------------------------------------|---|
| 341A    | How many 2-59 months were seen in the last quarter?                                       | _ _ _ _                                                                                  |                                                                   |   |
| 341     | Name of child                                                                             | _____ First name                                                                         |                                                                   |   |
|         |                                                                                           | _____ Last name                                                                          |                                                                   |   |
| 342     | Address of child                                                                          | _____ Gote name                                                                          |                                                                   |   |
|         |                                                                                           | _____ Keble name                                                                         |                                                                   |   |
| 343     | Date Seen                                                                                 | Gregorian calendar (DD/MM/YY)                                                            | _ _  / _ _  / _ _                                                 |   |
| 344     | Age of child at the time of consultation                                                  | Record age of child in months.<br>If unknown 99                                          | _ _   months                                                      |   |
| 345     | Gender                                                                                    | 1 = Male<br>2 = Female                                                                   | _                                                                 |   |
| 346     | Weight on the day of consultation in grams                                                | If weight is given in KGs record in grams<br>e.g 3.5 KG = 3500 grams.<br>If unknown 9999 | _ _ _ _  grams                                                    |   |
| 347     | Temperature on the day of consultation in degree Celsius                                  | Record temperature to one decimal place (e.g. 34.3 °C)<br>If unknown 99.9                | _ _ _ . _ _ °C                                                    |   |
| 348     | Respiratory Rate per minute on the day of consultation                                    | If unknown 999                                                                           | _ _ _                                                             |   |
| 349-373 | Signs and symptoms of the child at the time of consultation?<br><br>Record all that apply | For each: 1 = Yes 2 = No                                                                 |                                                                   |   |
|         |                                                                                           | 349                                                                                      | Reduced feeding/unable to feed                                    | _ |
|         |                                                                                           | 350                                                                                      | Vomiting                                                          | _ |
|         |                                                                                           | 351                                                                                      | Convulsion                                                        | _ |
|         |                                                                                           | 352                                                                                      | Movement only when stimulated or no movement even when stimulated | _ |
|         |                                                                                           | 353                                                                                      | Movement only when stimulated or no movement even when stimulated | _ |
|         |                                                                                           | 354                                                                                      | Restless/Irritable                                                | _ |
|         |                                                                                           | 355                                                                                      | Difficult breathing                                               | _ |
|         |                                                                                           | 356                                                                                      | Fast breathing                                                    | _ |
|         |                                                                                           | 357                                                                                      | Coughing                                                          | _ |
|         |                                                                                           | 358                                                                                      | Severe Chest in-drawing                                           | _ |
|         |                                                                                           | 359                                                                                      | Stridor                                                           | _ |
|         |                                                                                           | 360                                                                                      | Diarrhea                                                          | _ |
|         |                                                                                           | 361                                                                                      | Diarrhea lasting 14 days or more                                  | _ |
|         |                                                                                           | 362                                                                                      | Blood in the stool                                                | _ |
|         |                                                                                           | 363                                                                                      | Skin pinch goes back slowly                                       | _ |
|         |                                                                                           | 364                                                                                      | Skin pinch goes back very slowly                                  | _ |
|         |                                                                                           | 365                                                                                      | Fever                                                             | _ |
|         |                                                                                           | 366                                                                                      | Bulging fontanelle                                                | _ |
|         |                                                                                           | 367                                                                                      | Rash                                                              | _ |
| 368     | Mouth ulcers                                                                              | _                                                                                        |                                                                   |   |
| 369     | Pus or clouding of cornea                                                                 | _                                                                                        |                                                                   |   |
| 370     | Perform malaria RDT                                                                       | _                                                                                        |                                                                   |   |
| 371     | Discharge / pus in the ear                                                                | _                                                                                        |                                                                   |   |
| 372     | Swelling                                                                                  | _                                                                                        |                                                                   |   |
| 373     | Visible severe wasting                                                                    | _                                                                                        |                                                                   |   |

|  |                                                                            |                                                   |                                                                                                                                                             |    |
|--|----------------------------------------------------------------------------|---------------------------------------------------|-------------------------------------------------------------------------------------------------------------------------------------------------------------|----|
|  |                                                                            | 374                                               | Palmar pallor                                                                                                                                               | __ |
|  |                                                                            | 375                                               | Signs and symptoms not given                                                                                                                                | __ |
|  |                                                                            | 376                                               | Other – GO TO 377                                                                                                                                           | __ |
|  |                                                                            | 377                                               | Specify _____                                                                                                                                               |    |
|  | <b>Disease classification of the child</b><br><b>Record all that apply</b> |                                                   | For each:1 = Yes 2 = No                                                                                                                                     |    |
|  |                                                                            | 378                                               | One or more danger signs (unable to drink or breastfeed, vomits everything, convulsions, movement only when stimulated or no movement even when stimulated) | __ |
|  |                                                                            | 379                                               | Severe pneumonia/very severe disease                                                                                                                        | __ |
|  |                                                                            | 380                                               | Pneumonia                                                                                                                                                   | __ |
|  |                                                                            | 381                                               | Severe dehydration                                                                                                                                          | __ |
|  |                                                                            | 382                                               | Some dehydration                                                                                                                                            | __ |
|  |                                                                            | 383                                               | Severe persistent diarrhoea                                                                                                                                 | __ |
|  |                                                                            | 384                                               | Persistent diarrhoea                                                                                                                                        | __ |
|  |                                                                            | 385                                               | Dysentery                                                                                                                                                   | __ |
|  |                                                                            | 386                                               | Very severe febrile disease                                                                                                                                 | __ |
|  |                                                                            | 387                                               | Malaria                                                                                                                                                     | __ |
|  |                                                                            | 388                                               | Fever, malaria unlikely                                                                                                                                     | __ |
|  |                                                                            | 389                                               | Fever, no malaria                                                                                                                                           | __ |
|  |                                                                            | 390                                               | Severe complicated measles                                                                                                                                  | __ |
|  |                                                                            | 391                                               | Measles with eye/mouth complications                                                                                                                        | __ |
|  |                                                                            | 392                                               | Measles                                                                                                                                                     | __ |
|  |                                                                            | 393                                               | Acute ear infection                                                                                                                                         | __ |
|  |                                                                            | 394                                               | Chronic ear infection                                                                                                                                       | __ |
|  |                                                                            | 395                                               | Severe malnutrition                                                                                                                                         | __ |
|  |                                                                            | 396                                               | Moderate malnutrition                                                                                                                                       | __ |
|  |                                                                            | 397                                               | Severe anaemia                                                                                                                                              | __ |
|  |                                                                            | 398                                               | Anaemia                                                                                                                                                     | __ |
|  |                                                                            | 399                                               | Vaccination status not up-to-date                                                                                                                           | __ |
|  | 400                                                                        | Vaccine(s) needed (specify)                       | __                                                                                                                                                          |    |
|  | 401                                                                        | Vitamin A status not up-to-date                   | __                                                                                                                                                          |    |
|  | 402                                                                        | Classification not given                          | __                                                                                                                                                          |    |
|  | 403                                                                        | Other Go to 404                                   | __                                                                                                                                                          |    |
|  | 404                                                                        | Specify _____                                     |                                                                                                                                                             |    |
|  | <b>Treatment given to the child</b><br><b>Record all that apply</b>        |                                                   | For each:1 = Yes 2 = No                                                                                                                                     |    |
|  |                                                                            | 405                                               | ORS (Plan A) – Home treatment                                                                                                                               | __ |
|  |                                                                            | 406                                               | ORS (Plan B) – Facility treatment                                                                                                                           | __ |
|  |                                                                            | 407                                               | Zinc for ten days                                                                                                                                           | __ |
|  |                                                                            | 408                                               | Oral coartem (Anti-malarial)                                                                                                                                | __ |
|  |                                                                            | 409                                               | Oral chloroquine (Anti-malarial)                                                                                                                            | __ |
|  |                                                                            | 410                                               | Oral quinine (Anti-malarial)                                                                                                                                | __ |
|  |                                                                            | 411                                               | Rectal Artesunate (Anti-malarial)                                                                                                                           | __ |
|  |                                                                            | 412                                               | IV Quinine (Anti-malarial)                                                                                                                                  | __ |
|  |                                                                            | 413                                               | Other Antimalarial (specify)                                                                                                                                | __ |
|  |                                                                            | 414                                               | Cotrimoxazole                                                                                                                                               | __ |
|  |                                                                            | 415                                               | Vitamin A                                                                                                                                                   | __ |
|  |                                                                            | 416                                               | Paracetamol                                                                                                                                                 | __ |
|  |                                                                            | 417                                               | Gentamycin IM first dose                                                                                                                                    | __ |
|  |                                                                            | 418                                               | Gentamycin IM for seven days                                                                                                                                | __ |
|  | 419                                                                        | Amoxicillin suspension/dispersible first dose     | __                                                                                                                                                          |    |
|  | 420                                                                        | Amoxicillin suspension/dispersible for seven days | __                                                                                                                                                          |    |
|  | 421                                                                        | Amoxicillin suspension/dispersible for five days  | __                                                                                                                                                          |    |

|     |                                                     |     |                                 |    |
|-----|-----------------------------------------------------|-----|---------------------------------|----|
|     |                                                     | 422 | TTC (Tetracycline) eye ointment | __ |
|     |                                                     | 423 | Plumpy nut                      | __ |
|     |                                                     | 424 | BP100                           | __ |
|     |                                                     | 425 | Nutritional Counseling          | __ |
|     |                                                     | 426 | Other treatment GO TO 427       | __ |
|     |                                                     | 427 | Specify _____                   |    |
| 428 | <b>Was the child referred to a higher facility?</b> |     | 1 = Yes<br>2 = No               | __ |
|     | <b>Outcome of the child treatment</b>               |     | For each:1 = Yes 2 = No         |    |
|     |                                                     | 429 | Health improved/healed          | __ |
|     |                                                     | 430 | Died                            | __ |
|     |                                                     | 431 | Worsened                        | __ |
|     |                                                     | 432 | Same                            | __ |
|     |                                                     | 433 | Unknown                         | __ |
