# Supplementary material for: Health postservice readiness and use of preventive and curative services for suspected childhood pneumonia in Ethiopia: a cross-sectional study
Source: PubMed Central journal article supplement (PMC9047705; doi:10.1136/bmjopen-2021-058055), 2022-04-26
Supplement: bmjopen-2021-058055supp003.pdf [file bmjopen-2021-058055supp003.pdf]

## Module: 2

|        |                                                                           |                                                          |                                    |
|--------|---------------------------------------------------------------------------|----------------------------------------------------------|------------------------------------|
| 114    | What is your name?                                                        |                                                          |                                    |
| 115 Y  | What is your date of birth?                                               | yyyy  __ __ __ __ <br>Ethiopian Calendar                 |                                    |
| 115 M  | What is your date of birth?                                               | mm  __ __ <br>Ethiopian Calendar                         |                                    |
| 115 D  | What is your date of birth?                                               | dd  __ __ <br>Ethiopian Calendar                         |                                    |
| 116    | What is the number of years you attended school?                          | Write number of years                                    | __   __  Years                     |
| 117    | As an HEW, what is your level?                                            | 1 = Level 1<br>2 = Level 2<br>3 = Level 3<br>4 = Level 4 | __                                 |
| 118    | Do you have any specific qualification in addition to HEW training?       | 1 = Yes<br>2 = No – GO TO 120                            | __                                 |
| 119    | If yes, specify                                                           | _____                                                    |                                    |
| 120 YY | For how long have you worked as an HEW (including work at other kebeles)? | Write number of years.                                   | __   __  Years                     |
| 120MM  | If less than one year, enter number of months only.                       |                                                          | __   __  Months                    |
| 121YY  | For how long have you worked as an HEW in this Health post?               | Write number of years and months.                        | __   __  Years<br> __   __  Months |
| 121MM  | If less than one year, enter 00 years and number of months                |                                                          |                                    |
| 122    | Do you reside in this kebele?                                             | 1 = Yes<br>2 = No Skip to 124                            | __                                 |
| 123    | Was a home provided to you by the kebele?                                 | 1 = Yes<br>2 = No                                        | __                                 |
| 124    | How many HEWs work in this health post?                                   | Enter number, including the person being interviewed     | __                                 |
| 125    | In this health post who is the HEW in charge (senior HEW)?                | 1 = Myself<br>2 = Other HEW<br>3 = Neither of us         | __                                 |

|                                                                                                                              |                                                                                       |                          |                                      |    |
|------------------------------------------------------------------------------------------------------------------------------|---------------------------------------------------------------------------------------|--------------------------|--------------------------------------|----|
| 126                                                                                                                          | How many days a week is the health post facility functionally open by at least 1 HEW? | Enter number of days     | __                                   |    |
| 127                                                                                                                          | Do you post the health post functional days for clients to see?                       | 1 = Yes<br>2 = No        | __                                   |    |
| 128                                                                                                                          | Do you post the health posts hours of operation for clients to see?                   | 1 = Yes<br>2 = No        | __                                   |    |
| During the weekend and public holidays- where do the residents of the kebele seek medical care?<br><br>Select all that apply |                                                                                       | For each: 1 = Yes 2 = No |                                      |    |
|                                                                                                                              |                                                                                       | 129                      | Health center                        | __ |
|                                                                                                                              |                                                                                       | 130                      | Health Post                          | __ |
|                                                                                                                              |                                                                                       | 131                      | With HEW (at her house or elsewhere) | __ |
|                                                                                                                              |                                                                                       | 132                      | Pharmacy                             | __ |
|                                                                                                                              |                                                                                       | 133                      | Traditional Healers                  | __ |
|                                                                                                                              |                                                                                       | 134                      | Other –                              | __ |
|                                                                                                                              |                                                                                       | 135                      | Specify _____                        |    |

Instruction: From Question HEW\_132-HEW\_207  
Don't prompt. Select all mentioned

|                                                                                                       |  |                          |                                           |    |
|-------------------------------------------------------------------------------------------------------|--|--------------------------|-------------------------------------------|----|
| What are the main components of immediate newborn care?<br><br>Do not prompt<br>Select all mentioned. |  | For each: 1 = Yes 2 = No |                                           |    |
|                                                                                                       |  | 136                      | Deliver baby onto mother's abdomen        | __ |
|                                                                                                       |  | 137                      | Dry and wrap baby                         | __ |
|                                                                                                       |  | 138                      | Assess breathing                          | __ |
|                                                                                                       |  | 139                      | Delay cord clamping for three minutes     | __ |
|                                                                                                       |  | 140                      | Tie and cut cord appropriately            | __ |
|                                                                                                       |  | 141                      | Skin to skin contact                      | __ |
|                                                                                                       |  | 142                      | Initiate breastfeeding                    | __ |
|                                                                                                       |  | 143                      | Apply TTC eye ointment                    | __ |
|                                                                                                       |  | 144                      | Apply chlorohexidine on cord              | __ |
|                                                                                                       |  | 145                      | Give Vitamin K                            | __ |
|                                                                                                       |  | 146                      | Weight baby                               | __ |
|                                                                                                       |  | 999                      | None mentioned from the list              |    |
| What are the main components of the first PNC visit for newborn?                                      |  | For each: 1 = Yes 2 = No |                                           |    |
|                                                                                                       |  | 147                      | Advice washing hands before touching baby | __ |

|                                                                                                                                                                                        |                                                                                 |                                                         |    |
|----------------------------------------------------------------------------------------------------------------------------------------------------------------------------------------|---------------------------------------------------------------------------------|---------------------------------------------------------|----|
| Do not prompt<br>Select all mentioned                                                                                                                                                  | 148                                                                             | Check for danger sings                                  | __ |
|                                                                                                                                                                                        | 149                                                                             | Check for congenital abnormalities                      | __ |
|                                                                                                                                                                                        | 150                                                                             | Measure temp                                            | __ |
|                                                                                                                                                                                        | 151                                                                             | Measure weight                                          | __ |
|                                                                                                                                                                                        | 152                                                                             | Apply TTC eye ointment                                  | __ |
|                                                                                                                                                                                        | 153                                                                             | Encourage exclusive breast feeding for baby             | __ |
|                                                                                                                                                                                        | 154                                                                             | Advice to delay bathing of baby for 24 hrs              | __ |
|                                                                                                                                                                                        | 155                                                                             | Encourage skin to skin contact                          | __ |
|                                                                                                                                                                                        | 156                                                                             | Provide cord care (Chlorohexidine)                      | __ |
|                                                                                                                                                                                        | 157                                                                             | Education on appropriate cord care (Chlorohexidine)     | __ |
|                                                                                                                                                                                        | 158                                                                             | Vaccinate for polio and BCG                             | __ |
| 159                                                                                                                                                                                    | Teach mother on how to recognize newborn danger signs using family health card. | __                                                      |    |
| 999                                                                                                                                                                                    | None mentioned from the list                                                    |                                                         |    |
| What are the main components of <u>subsequent (3<sup>rd</sup> and 7<sup>th</sup> day and 6<sup>th</sup> week) PNC visits for newborn?</u><br><br>Do not prompt<br>Select all mentioned | <b>For each: 1 = Yes 2 = No</b>                                                 |                                                         |    |
|                                                                                                                                                                                        | 160                                                                             | Check for newborn danger signs                          | __ |
|                                                                                                                                                                                        | 161                                                                             | Advice to keep cord clean                               | __ |
|                                                                                                                                                                                        | 162                                                                             | Assess breastfeeding                                    | __ |
|                                                                                                                                                                                        | 163                                                                             | Advise on breastfeeding                                 | __ |
|                                                                                                                                                                                        | 164                                                                             | Ensure baby is kept warm                                | __ |
|                                                                                                                                                                                        | 165                                                                             | Check baby's weight                                     | __ |
|                                                                                                                                                                                        | 166                                                                             | Vaccination                                             | __ |
| 999                                                                                                                                                                                    | None mentioned from the list                                                    |                                                         |    |
| When a newborn weighs less than 1.5 kgs or has a gestational age of less than 32 weeks, what special care do you provide?<br><br>Do not prompt<br>Select all mentioned                 | <b>For each: 1 = Yes 2 = No</b>                                                 |                                                         |    |
|                                                                                                                                                                                        | 167                                                                             | Continue feeding with expressed breast milk             | __ |
|                                                                                                                                                                                        | 168                                                                             | Monitor ability to breastfeed                           | __ |
|                                                                                                                                                                                        | 169                                                                             | Cover baby well including head                          | __ |
|                                                                                                                                                                                        | 170                                                                             | Hold close to mother                                    | __ |
|                                                                                                                                                                                        | 171                                                                             | Refer urgently with mother to health center or hospital | __ |
| 999                                                                                                                                                                                    | None mentioned from the list                                                    |                                                         |    |
| When a newborn weighs between 1.5 - 2.5 kgs or has a gestational age of 32-37 weeks, what special care do you provide?<br><br>Do not prompt<br>Select all mentioned                    | <b>For each: 1 = Yes 2 = No</b>                                                 |                                                         |    |
|                                                                                                                                                                                        | 172                                                                             | Make sure the baby is warm                              | __ |
|                                                                                                                                                                                        | 173                                                                             | Educate on optimal breastfeeding                        | __ |
|                                                                                                                                                                                        | 174                                                                             | Monitor ability to breastfeed                           | __ |
|                                                                                                                                                                                        | 175                                                                             | Monitor baby for the first 24 hours                     | __ |
|                                                                                                                                                                                        | 176                                                                             | Educate on infection prevention                         | __ |
| 999                                                                                                                                                                                    | None mentioned from the list                                                    |                                                         |    |
| What are the main signs for good attachment                                                                                                                                            | <b>For each: 1 = Yes 2 = No</b>                                                 |                                                         |    |

|                                                                                                                                                       |                                 |                                                                                                                                |    |
|-------------------------------------------------------------------------------------------------------------------------------------------------------|---------------------------------|--------------------------------------------------------------------------------------------------------------------------------|----|
| <b>during breast feeding?</b><br><br>Do not prompt<br>Select all mentioned                                                                            | 177                             | Chin touching breast                                                                                                           | __ |
|                                                                                                                                                       | 178                             | Mouth open wide                                                                                                                | __ |
|                                                                                                                                                       | 179                             | Lower lip turned out                                                                                                           | __ |
|                                                                                                                                                       | 180                             | More areola showing above                                                                                                      | __ |
|                                                                                                                                                       | 999                             | None mentioned from the list                                                                                                   |    |
| <b>How do you determine feeding problems in a newborn?</b><br><br>Do not prompt<br>Select all mentioned                                               | <b>For each: 1 = Yes 2 = No</b> |                                                                                                                                |    |
|                                                                                                                                                       | 181                             | Not well-attached to breast                                                                                                    | __ |
|                                                                                                                                                       | 182                             | Not suckling effectively                                                                                                       | __ |
|                                                                                                                                                       | 183                             | Less than 8 breastfeeds in 24 hours                                                                                            | __ |
|                                                                                                                                                       | 184                             | Switching to another breast before one is emptied                                                                              | __ |
|                                                                                                                                                       | 185                             | Receives other foods or drinks (even water)                                                                                    | __ |
|                                                                                                                                                       | 186                             | Underweight for age                                                                                                            | __ |
|                                                                                                                                                       | 187                             | Thrush (ulcers or white patches in mouth)                                                                                      | __ |
| 999                                                                                                                                                   | None mentioned from the list    |                                                                                                                                |    |
| <b>When a newborn shows signs of feeding problems or is underweight, what initial steps do you take?</b><br><br>Do not prompt<br>Select all mentioned | <b>For each: 1 = Yes 2 = No</b> |                                                                                                                                |    |
|                                                                                                                                                       | 188                             | Advise mother to breastfeed as often and as long as infant wants in 24 hours                                                   | __ |
|                                                                                                                                                       | 189                             | Teach mother correct positioning and attachment                                                                                | __ |
|                                                                                                                                                       | 190                             | Educate on exclusive breastfeeding                                                                                             | __ |
|                                                                                                                                                       | 191                             | Teach the mother to treat thrush at home                                                                                       | __ |
|                                                                                                                                                       | 192                             | Follow-up any feeding problem                                                                                                  | __ |
|                                                                                                                                                       | 193                             | Follow-up any thrush in two days                                                                                               | __ |
|                                                                                                                                                       | 194                             | Follow-up underweight for age in 14 days                                                                                       | __ |
| 999                                                                                                                                                   | None mentioned from the list    |                                                                                                                                |    |
| <b>What are the main signs for very severe disease in newborns?</b><br><br>Do not prompt<br>Select all mentioned                                      | <b>For each: 1 = Yes 2 = No</b> |                                                                                                                                |    |
|                                                                                                                                                       | 195                             | Convulsions                                                                                                                    | __ |
|                                                                                                                                                       | 196                             | Stopped feeding or significantly reduced feeding                                                                               | __ |
|                                                                                                                                                       | 197                             | Severe chest in drawing                                                                                                        | __ |
|                                                                                                                                                       | 198                             | Fast breathing                                                                                                                 | __ |
|                                                                                                                                                       | 199                             | Temperature with 37.5 or more (warm)<br><i>(Note: if high temperature only mentioned ask for clarification to what extent)</i> | __ |
|                                                                                                                                                       | 200                             | Temperature less than 35.5 (cold)<br><i>(Note: if low temperature only mentioned ask for clarification to what extent)</i>     | __ |
|                                                                                                                                                       | 201                             | No or very limited movement on stimulation                                                                                     | __ |

|                                                                                                                                                   |                                                                                          |                                 |                                                                                      |    |
|---------------------------------------------------------------------------------------------------------------------------------------------------|------------------------------------------------------------------------------------------|---------------------------------|--------------------------------------------------------------------------------------|----|
|                                                                                                                                                   |                                                                                          | 999                             | None mentioned from the list                                                         |    |
| <b>When the newborn presents sign of very severe disease, what initial steps do you take?</b><br><br>Do not prompt<br>Select all mentioned        | <b>For each: 1 = Yes 2 = No</b>                                                          |                                 |                                                                                      |    |
|                                                                                                                                                   | 202                                                                                      |                                 | Continue to breastfeed or if unable to suck give breast milk that has been expressed | __ |
|                                                                                                                                                   | 203                                                                                      |                                 | Begin a dose of amoxicillin (pre-referral)                                           | __ |
|                                                                                                                                                   | 204                                                                                      |                                 | Begin a dose of gentamycin antibiotics (pre-referral)                                | __ |
|                                                                                                                                                   | 205                                                                                      |                                 | Refer URGENTLY                                                                       | __ |
|                                                                                                                                                   | 206                                                                                      |                                 | When referral is not possible treat with/prescribe amoxicillin for 7 days            | __ |
|                                                                                                                                                   | 207                                                                                      |                                 | When referral is not possible treat with gentamycin daily for 7 days                 | __ |
|                                                                                                                                                   |                                                                                          | 999                             | None mentioned from the list                                                         |    |
| <b>What are the main signs for local bacterial infection in newborns?</b><br><br>Do not prompt<br>Select all mentioned                            | <b>For each: 1 = Yes 2 = No</b>                                                          |                                 |                                                                                      |    |
|                                                                                                                                                   | 208                                                                                      |                                 | Umbilicus red                                                                        | __ |
|                                                                                                                                                   | 209                                                                                      |                                 | Umbilicus draining pus                                                               | __ |
|                                                                                                                                                   |                                                                                          | 210                             | Skin pustules                                                                        | __ |
|                                                                                                                                                   |                                                                                          | 999                             | None mentioned from the list                                                         |    |
| <b>When the newborn presents signs of local bacterial infection, what initial steps do you take?</b><br><br>Do not prompt<br>Select all mentioned | <b>For each: 1 = Yes 2 = No</b>                                                          |                                 |                                                                                      |    |
|                                                                                                                                                   | 211                                                                                      |                                 | Give amoxicillin syrup for 5 days                                                    | __ |
|                                                                                                                                                   | 212                                                                                      |                                 | Follow up care on 2 <sup>nd</sup> day from initial visit                             | __ |
|                                                                                                                                                   | 213                                                                                      |                                 | Advice mother when to return                                                         | __ |
|                                                                                                                                                   | 214                                                                                      |                                 | Breastfeed more frequently                                                           | __ |
|                                                                                                                                                   | 215                                                                                      |                                 | Advice mother to give breast milk more frequently                                    | __ |
|                                                                                                                                                   |                                                                                          | 216                             | Advice mother to keep baby warm                                                      | __ |
|                                                                                                                                                   |                                                                                          | 999                             | None mentioned from the list                                                         |    |
| 217                                                                                                                                               | Are there any possible side effects of using injectable gentamicin for neonatal illness? |                                 | <b>1= Yes –</b><br><b>2 = No – Skip to 228</b>                                       | __ |
|                                                                                                                                                   |                                                                                          | <b>For each: 1 = Yes 2 = No</b> |                                                                                      |    |
| 218                                                                                                                                               | What are the possible side effects of using injectable gentamicin for neonatal illness?  |                                 |                                                                                      |    |
| <b>What are the possible side effects of using injectable gentamicin for neonatal illness?</b>                                                    | 218                                                                                      |                                 | Kidney damage (nephropathy)                                                          | __ |
|                                                                                                                                                   | 219                                                                                      |                                 | Nerve damage (neuropathy especially hearing or visual damage)                        | __ |
|                                                                                                                                                   | 220                                                                                      |                                 | Hearing loss                                                                         | __ |
|                                                                                                                                                   | 221                                                                                      |                                 | Lethargy                                                                             | __ |
|                                                                                                                                                   | 222                                                                                      |                                 | Nausea/vomiting                                                                      | __ |

|     |                                                                                                                                             |                          |                                                                                                                |    |
|-----|---------------------------------------------------------------------------------------------------------------------------------------------|--------------------------|----------------------------------------------------------------------------------------------------------------|----|
|     |                                                                                                                                             | 223                      | General anaphylactic reaction                                                                                  | __ |
|     |                                                                                                                                             | 224                      | Fever                                                                                                          | __ |
|     |                                                                                                                                             | 225                      | Poor appetite                                                                                                  | __ |
|     |                                                                                                                                             | 226                      | Weight loss                                                                                                    | __ |
|     |                                                                                                                                             | 227                      | Skin rash                                                                                                      | __ |
| 228 | Is there any contraindication of using injectable gentamicin for the neonatal illness?                                                      |                          | 1= Yes<br>2 = No – 232                                                                                         |    |
|     | What are those possible contraindications of using injectable gentamicin for the neonatal illness?                                          | For each: 1 = Yes 2 = No |                                                                                                                |    |
|     |                                                                                                                                             | 229                      | History of general body reaction or shock to injectable gentamicin (Anaphylactic reaction)                     | __ |
|     |                                                                                                                                             | 230                      | History of kidney/urine problem                                                                                | __ |
|     |                                                                                                                                             | 231                      | History of skin reaction to gentamicin                                                                         | __ |
| 232 | Are there any possible side effects of using amoxicillin for the neonatal illness?                                                          |                          | 1= Yes<br>2 = No – 234                                                                                         | __ |
|     |                                                                                                                                             | For each: 1 = Yes 2 = No |                                                                                                                |    |
| 233 | What are the possible side effects of using amoxicillin for the neonatal illness?                                                           |                          | 1 = General anaphylactic reaction (penicillin hypersensitivity)<br>9. Not mentioned                            | __ |
| 234 | Is there any contraindication of using amoxicillin for the neonatal illness?                                                                |                          | 1= Yes<br>2 = No – GO TO 236                                                                                   | __ |
|     |                                                                                                                                             | For each: 1 = Yes 2 = No |                                                                                                                |    |
| 235 | What are those possible contraindications of using amoxicillin for the neonatal illness                                                     |                          | 1 = History of General body reaction or shock to amoxicillin (penicillin hypersensitivity)<br>9. Not mentioned | __ |
| 236 | Are there any possible additional side effects of using antibiotics (injectable gentamicin or amoxicillin) for non-severe neonatal illness? |                          | 1= Yes<br>2 = No – 238                                                                                         | __ |
|     |                                                                                                                                             | For each: 1 = Yes 2 = No |                                                                                                                |    |
| 237 | What are those additional side effects of using antibiotics (injectable gentamicin or amoxicillin) for non-severe neonatal illness?         |                          | 1 = Drug resistance<br>9. Not mentioned                                                                        | __ |
|     | What are the main signs for jaundice in newborns?<br><br>Do not prompt<br>Select all mentioned                                              | For each: 1 = Yes 2 = No |                                                                                                                |    |
|     |                                                                                                                                             | 238                      | Yellow skin                                                                                                    | __ |
|     |                                                                                                                                             | 239                      | Yellow eyes                                                                                                    | __ |
|     |                                                                                                                                             | 999                      | Not mentioned                                                                                                  |    |
|     | When the newborn presents signs of jaundice, what initial steps do you take?<br><br>Do not prompt<br>Select all mentioned                   | For each: 1 = Yes 2 = No |                                                                                                                |    |
|     |                                                                                                                                             | 240                      | Breastfeed more frequently                                                                                     | __ |
|     |                                                                                                                                             | 241                      | Advise mother to keep young infant warm                                                                        | __ |
|     |                                                                                                                                             | 242                      | Expose to sunshine 20 to 30 minutes every day                                                                  | __ |

|                                                                                                                                                              |                                 |                                                                               |    |
|--------------------------------------------------------------------------------------------------------------------------------------------------------------|---------------------------------|-------------------------------------------------------------------------------|----|
|                                                                                                                                                              | 243                             | Advise mother to return immediately if sign & symptoms of jaundice aggravates | __ |
|                                                                                                                                                              | 244                             | Follow-up in 2 days                                                           | __ |
| <b>What are the main symptoms/signs for severe jaundice in newborns?</b><br><br>Do not prompt<br>Select all mentioned                                        | <b>For each: 1 = Yes 2 = No</b> |                                                                               |    |
|                                                                                                                                                              | 245                             | Jaundice in newborns of Age 14 days or more                                   | __ |
|                                                                                                                                                              | 246                             | Jaundice in newborns of Age less than 24 hours                                | __ |
|                                                                                                                                                              | 247                             | Palms yellow                                                                  | __ |
|                                                                                                                                                              | 248                             | Soles yellow                                                                  | __ |
|                                                                                                                                                              | 999                             | Not mentioned from the list                                                   |    |
| <b>When the newborn presents symptoms /signs of severe jaundice what initial steps do you take?</b><br><br>Do not prompt<br>Select all mentioned             | <b>For each: 1 = Yes 2 = No</b> |                                                                               |    |
|                                                                                                                                                              | 249                             | Breastfeed more frequently                                                    | __ |
|                                                                                                                                                              | 250                             | Refer URGENTLY to health center /hospital                                     | __ |
|                                                                                                                                                              | 251                             | Keep the baby warm                                                            | __ |
| <b>What are the main signs for some dehydration caused by diarrhea in newborns?</b><br><br>Do not prompt<br>Select all mentioned                             | <b>For each: 1 = Yes 2 = No</b> |                                                                               |    |
|                                                                                                                                                              | 252                             | Restless and irritable                                                        | __ |
|                                                                                                                                                              | 253                             | Sunken eyes                                                                   | __ |
|                                                                                                                                                              | 254                             | Skin pinch goes back slowly                                                   | __ |
|                                                                                                                                                              | 999                             | None mentioned from the list                                                  |    |
| <b>When the newborn presents signs of some dehydration caused by diarrhea what initial steps do you take?</b><br><br>Do not prompt<br>Select all mentioned   | <b>For each: 1 = Yes 2 = No</b> |                                                                               |    |
|                                                                                                                                                              | 255                             | Give ORS fluids                                                               | __ |
|                                                                                                                                                              | 256                             | Give zinc treatment for 10 days                                               | __ |
|                                                                                                                                                              | 257                             | Advise mother to breastfeed more frequently and longer                        | __ |
|                                                                                                                                                              | 258                             | Keep the infant warm                                                          | __ |
|                                                                                                                                                              | 259                             | Advise mother when to return                                                  | __ |
|                                                                                                                                                              | 260                             | Follow up in 2 days                                                           | __ |
|                                                                                                                                                              | 999                             | None mentioned from the list                                                  |    |
| <b>What are the main symptoms/signs for severe dehydration caused by diarrhea in newborns?</b><br><br>Do not prompt<br>Select all mentioned                  | <b>For each: 1 = Yes 2 = No</b> |                                                                               |    |
|                                                                                                                                                              | 261                             | Limited or No movement even when stimulated                                   | __ |
|                                                                                                                                                              | 262                             | Sunken eyes                                                                   | __ |
|                                                                                                                                                              | 263                             | Skin pinch goes back VERY slowly                                              | __ |
|                                                                                                                                                              | 999                             | None mentioned from the list                                                  |    |
| <b>When the newborn presents signs of severe dehydration caused by diarrhea what initial steps do you take?</b><br><br>Do not prompt<br>Select all mentioned | 264                             | Give first dose of amoxicillin syrup                                          | __ |
|                                                                                                                                                              | 265                             | Give first dose of IM Gentamycin                                              | __ |
|                                                                                                                                                              | 266                             | Refer URGENTLY to health center/hospital                                      | __ |
|                                                                                                                                                              | 267                             | Ensure mother gives child ORS on the way to health center/hospital            | __ |
|                                                                                                                                                              | 268                             | Advise mother to breastfeed more                                              | __ |



|                                                                                                                                             |                                 |                                                               |    |
|---------------------------------------------------------------------------------------------------------------------------------------------|---------------------------------|---------------------------------------------------------------|----|
|                                                                                                                                             |                                 | frequently and longer                                         |    |
|                                                                                                                                             | 269                             | Advise mother to keep young infant warm                       | __ |
| <b>What are the main signs and symptoms of pneumonia in a child aged 2-59 months?</b><br><br>Do not prompt<br>Select all mentioned          | <b>For each: 1 = Yes 2 = No</b> |                                                               |    |
|                                                                                                                                             | 270                             | Cough                                                         | __ |
|                                                                                                                                             | 271                             | Difficult or fast breathing                                   | __ |
|                                                                                                                                             | 272                             | Chest indrawing                                               | __ |
|                                                                                                                                             | 273                             | Stridor                                                       | __ |
|                                                                                                                                             | 999                             |                                                               |    |
| <b>When the child presents signs and symptoms of pneumonia what initial steps do you take?</b><br><br>Do not prompt<br>Select all mentioned | <b>For each: 1 = Yes 2 = No</b> |                                                               |    |
|                                                                                                                                             | 274                             | Give antibiotics                                              | __ |
|                                                                                                                                             | 275                             | Advise on when/how to administer                              | __ |
|                                                                                                                                             | 276                             | Keep the child warm                                           | __ |
|                                                                                                                                             | 277                             | Advise mother when to return                                  | __ |
|                                                                                                                                             | 999                             | None mentioned from the list                                  |    |
| <b>What are the main signs and symptoms of diarrhea in a child aged 2-59 months?</b><br><br>Do not prompt<br>Select all mentioned           | <b>For each: 1 = Yes 2 = No</b> |                                                               |    |
|                                                                                                                                             | 278                             | Diarrhea                                                      |    |
|                                                                                                                                             | 279                             | Blood in stool                                                |    |
|                                                                                                                                             | 280                             | Restless or irritable                                         |    |
|                                                                                                                                             | 281                             | Sunken eyes                                                   | __ |
|                                                                                                                                             | 282                             | Skin pinch goes back slowly                                   | __ |
|                                                                                                                                             | 999                             | None mentioned from the list                                  |    |
| <b>When the child presents signs and symptoms of diarrhea what initial steps do you take?</b><br><br>Do not prompt<br>Select all mentioned  | <b>For each: 1 = Yes 2 = No</b> |                                                               |    |
|                                                                                                                                             | 283                             | Give ORS fluids                                               | __ |
|                                                                                                                                             | 284                             | Give zinc treatment for 10 days                               | __ |
|                                                                                                                                             | 285                             | Advise on when/how to administer                              |    |
|                                                                                                                                             | 286                             | Advise mother to breastfeed / feed more frequently and longer | __ |
|                                                                                                                                             | 287                             | Keep the child warm                                           | __ |
|                                                                                                                                             | 288                             | Advise mother when to return                                  | __ |
|                                                                                                                                             | 289                             | Follow up in 2 days                                           |    |
|                                                                                                                                             | 999                             | None mentioned from the list                                  |    |
| <b>What are the main signs and symptoms of malaria in a child aged 2-59 months?</b><br><br>Do not prompt<br>Select all mentioned            | <b>For each: 1 = Yes 2 = No</b> |                                                               |    |
|                                                                                                                                             | 290                             | Fever                                                         | __ |
|                                                                                                                                             | 291                             | Chillis                                                       | __ |
| <b>When the child presents signs and symptoms of malaria what initial steps do you take?</b><br><br>Do not prompt<br>Select all mentioned   | <b>For each: 1 = Yes 2 = No</b> |                                                               |    |
|                                                                                                                                             | 292                             | Use RDT to test for malaria                                   | __ |
|                                                                                                                                             | 293                             | Treat malaria with Coartem / ACT                              | __ |
|                                                                                                                                             | 294                             | Advise on when/how to administer Coartem                      |    |
|                                                                                                                                             | 295                             | Advise mother when to return                                  | __ |
|                                                                                                                                             | 999                             | None mentioned from the list                                  |    |

|                                                                                                                                                      |                                 |                                                                   |    |
|------------------------------------------------------------------------------------------------------------------------------------------------------|---------------------------------|-------------------------------------------------------------------|----|
| <b>What are the main signs and symptoms of acute malnutrition in a child aged 2-59 months?</b><br><br>Do not prompt<br>Select all mentioned          | <b>For each: 1 = Yes 2 = No</b> |                                                                   |    |
|                                                                                                                                                      | 296                             | Pitting edema of both feet                                        | __ |
|                                                                                                                                                      | 297                             | Visible severe wasting                                            | __ |
|                                                                                                                                                      | 298                             | MUAC measurement <11cm (if 6 months or older)                     | __ |
|                                                                                                                                                      | 999                             | None mentioned from the list                                      |    |
| <b>When the child presents signs and symptoms of acute malnutrition what initial steps do you take?</b><br><br>Do not prompt<br>Select all mentioned | <b>For each: 1 = Yes 2 = No</b> |                                                                   |    |
|                                                                                                                                                      | 299                             | Appetite test if 6 months or older                                | __ |
|                                                                                                                                                      | 300                             | Give with RUTF (Plumpy nut or BP 100)                             | __ |
|                                                                                                                                                      | 301                             | Advise on when/how to take RUTF                                   | __ |
|                                                                                                                                                      | 302                             | Advise mother when to return                                      | __ |
| <b>What are general danger signs in child aged 2-59 months?</b><br><br>Do not prompt<br>Select all mentioned                                         | <b>For each: 1 = Yes 2 = No</b> |                                                                   |    |
|                                                                                                                                                      | 303                             | Unable to drink or breastfeed                                     | __ |
|                                                                                                                                                      | 304                             | Convulsions                                                       | __ |
|                                                                                                                                                      | 305                             | Movement only when stimulated or no movement even when stimulated | __ |
|                                                                                                                                                      | 999                             | None mentioned from the list                                      |    |
| <b>When the child presents with general danger signs and symptoms what initial steps do you take?</b><br><br>Do not prompt<br>Select all mentioned   | <b>For each: 1 = Yes 2 = No</b> |                                                                   |    |
|                                                                                                                                                      | 306                             | Refer to health centre                                            | __ |
|                                                                                                                                                      | 307                             | Give pre-referral dose and refer to health center                 | __ |
|                                                                                                                                                      | 308                             | Give ORS                                                          | __ |
|                                                                                                                                                      | 999                             | None mentioned from the list                                      |    |

#### MODULE 4: TRAINING OF THE HEW

**Interviewer:** *I would now like to ask you some questions on your training.*

**INTERVIEWER: PLEASE STATE THE START AND END MONTHS THAT CAPTURE THE PAST 12 MONTHS FROM THE DATE OF THE INTERVIEW AND INSERT IT INTO THE QUESTION BELOW.**

***Have you received training or training update from HC, Woreda health office or NGO in the last 12 months between \_\_\_\_\_ (start month) and \_\_\_\_\_ (end month) in?***  
**[READ TOPIC]**

**FOR EACH QUESTION IF NO ASK THE FOLLOWING: *Did you receive a training or training update more than 12 months ago?***

**REPEAT BOTH QUESTIONS FOR EACH TOPIC**

|     |      | Yes, within past 12 months | Yes, over past 12 months ago | No in-service training or update |    |
|-----|------|----------------------------|------------------------------|----------------------------------|----|
| 309 | CBNC | 1                          | 2                            | 3                                | __ |

|                                                                                                               |                                                                                                                                                                                |                                                                                                                                                                                                    |                                |   |                          |                          |
|---------------------------------------------------------------------------------------------------------------|--------------------------------------------------------------------------------------------------------------------------------------------------------------------------------|----------------------------------------------------------------------------------------------------------------------------------------------------------------------------------------------------|--------------------------------|---|--------------------------|--------------------------|
| 310                                                                                                           | Providing antenatal services                                                                                                                                                   | 1                                                                                                                                                                                                  | 2                              | 3 | <input type="checkbox"/> |                          |
| 311                                                                                                           | PMTCT                                                                                                                                                                          | 1                                                                                                                                                                                                  | 2                              | 3 | <input type="checkbox"/> |                          |
| 312                                                                                                           | Misoprostol use                                                                                                                                                                | 1                                                                                                                                                                                                  | 2                              | 3 | <input type="checkbox"/> |                          |
| 313                                                                                                           | Providing post-natal care to mother                                                                                                                                            | 1                                                                                                                                                                                                  | 2                              | 3 | <input type="checkbox"/> |                          |
| 314                                                                                                           | Providing postnatal care to newborn                                                                                                                                            | 1                                                                                                                                                                                                  | 2                              | 3 | <input type="checkbox"/> |                          |
| 315                                                                                                           | Clean cord care                                                                                                                                                                | 1                                                                                                                                                                                                  | 2                              | 3 | <input type="checkbox"/> |                          |
| 316                                                                                                           | Managing newborns with very severe disease                                                                                                                                     | 1                                                                                                                                                                                                  | 2                              | 3 | <input type="checkbox"/> |                          |
| 317                                                                                                           | Managing newborn with local bacterial infection                                                                                                                                | 1                                                                                                                                                                                                  | 2                              | 3 | <input type="checkbox"/> |                          |
| 318                                                                                                           | Managing newborn neonates with jaundice/severe jaundice                                                                                                                        | 1                                                                                                                                                                                                  | 2                              | 3 | <input type="checkbox"/> |                          |
| 319                                                                                                           | Managing neonates with diarrhea                                                                                                                                                | 1                                                                                                                                                                                                  | 2                              | 3 | <input type="checkbox"/> |                          |
| 320                                                                                                           | Managing neonates with feeding problem or who are underweight                                                                                                                  | 1                                                                                                                                                                                                  | 2                              | 3 | <input type="checkbox"/> |                          |
| 321                                                                                                           | iCCM                                                                                                                                                                           | 1                                                                                                                                                                                                  | 2                              | 3 | <input type="checkbox"/> |                          |
| 322                                                                                                           | Using referral forms for VSD                                                                                                                                                   | 1                                                                                                                                                                                                  | 2                              | 3 | <input type="checkbox"/> |                          |
| 323                                                                                                           | Using/filling family folder                                                                                                                                                    | 1                                                                                                                                                                                                  | 2                              | 3 | <input type="checkbox"/> |                          |
| 324                                                                                                           | Integrated Refresher training on MNCH services                                                                                                                                 | 1                                                                                                                                                                                                  | 2                              | 3 | <input type="checkbox"/> |                          |
| 325                                                                                                           | EPI                                                                                                                                                                            | 1                                                                                                                                                                                                  | 2                              | 3 | <input type="checkbox"/> |                          |
| 326                                                                                                           | Can you tell us whether or not you were satisfied with the quality of training received for managing sick <u>neonate</u> ?<br><br><b>Do not give options to the respondent</b> | <b>1 = Yes was satisfied</b><br><b>2 = No was not satisfied – GO TO 328</b><br><b>3 = Neither satisfied nor dissatisfied – GO TO 329</b><br><b>4= No training in the last 12 months –GO TO 335</b> |                                |   | <input type="checkbox"/> |                          |
| 327                                                                                                           | <b>IF YES</b> , then what was the level of satisfaction<br><br><b>Give both options to the respondent</b>                                                                      | <b>1. Fully satisfied – GO TO 329</b><br><b>2. Somewhat satisfied – GO TO 329</b>                                                                                                                  |                                |   | <input type="checkbox"/> |                          |
| 328                                                                                                           | <b>IF NO</b> , then what was the level of dissatisfaction<br><br><b>Give both options to the respondent</b>                                                                    | <b>1. Fully dissatisfied</b><br><b>2. Somewhat dissatisfied</b>                                                                                                                                    |                                |   | <input type="checkbox"/> |                          |
| How can the quality of the training be further improved<br><b>Read list.</b><br><b>Select all that apply.</b> |                                                                                                                                                                                | <b>For each: 1 = Yes 2 = No</b>                                                                                                                                                                    |                                |   |                          |                          |
|                                                                                                               |                                                                                                                                                                                | 329                                                                                                                                                                                                | More training                  |   |                          | <input type="checkbox"/> |
|                                                                                                               |                                                                                                                                                                                | 330                                                                                                                                                                                                | More practice sessions         |   |                          | <input type="checkbox"/> |
|                                                                                                               |                                                                                                                                                                                | 331                                                                                                                                                                                                | More training aids             |   |                          | <input type="checkbox"/> |
|                                                                                                               |                                                                                                                                                                                | 332                                                                                                                                                                                                | More post training supervision |   |                          | <input type="checkbox"/> |
|                                                                                                               |                                                                                                                                                                                | 333                                                                                                                                                                                                | Other – <b>GO TO 334</b>       |   |                          | <input type="checkbox"/> |
| 334                                                                                                           | Specify _____                                                                                                                                                                  |                                                                                                                                                                                                    |                                |   |                          |                          |

| <b>MODULE 5: SUPPORTIVE SUPERVISION</b>                                                                                                                                                                                                                                                                                                 |                                                                                |                                                                                                                                                                                                                                |                                                                                              |                      |
|-----------------------------------------------------------------------------------------------------------------------------------------------------------------------------------------------------------------------------------------------------------------------------------------------------------------------------------------|--------------------------------------------------------------------------------|--------------------------------------------------------------------------------------------------------------------------------------------------------------------------------------------------------------------------------|----------------------------------------------------------------------------------------------|----------------------|
| <b>INTERVIEWER:</b><br><i>I would now like to ask some questions about <u>supportive supervision</u> you have received. By supportive supervision I mean being visited by individuals from the region, zone, woreda and/or health center to discuss, review and give feedback on your <u>TECHNICAL</u> or <u>PROFESSIONAL</u> work.</i> |                                                                                |                                                                                                                                                                                                                                |                                                                                              |                      |
| <b>INTERVIEWER: PLEASE STATE THE START AND END MONTHS THAT CAPTURE THE PAST 6 MONTHS FROM THE DATE OF THE INTERVIEW AND INSERT IT INTO THE QUESTION BELOW.</b>                                                                                                                                                                          |                                                                                |                                                                                                                                                                                                                                |                                                                                              |                      |
| <b><u>LAST 6 MONTHS: STATE THE START &amp; END MONTHS</u></b>                                                                                                                                                                                                                                                                           |                                                                                |                                                                                                                                                                                                                                |                                                                                              |                      |
| START MONTH _____                                                                                                                                                                                                                                                                                                                       |                                                                                |                                                                                                                                                                                                                                |                                                                                              |                      |
| END MONTH _____                                                                                                                                                                                                                                                                                                                         |                                                                                |                                                                                                                                                                                                                                |                                                                                              |                      |
| 335                                                                                                                                                                                                                                                                                                                                     | Have you received a supportive supervisory visit in the last 6 months?         | 1 = Yes<br>2 = No – GO TO 366                                                                                                                                                                                                  | <input type="text"/>                                                                         |                      |
| <b>IF YES:</b> Who from?<br><br><b>Select all that apply</b>                                                                                                                                                                                                                                                                            |                                                                                | <b>For each: 1 = Yes 2 = No</b>                                                                                                                                                                                                |                                                                                              |                      |
|                                                                                                                                                                                                                                                                                                                                         |                                                                                | 336                                                                                                                                                                                                                            | Woreda health office                                                                         | <input type="text"/> |
|                                                                                                                                                                                                                                                                                                                                         |                                                                                | 337                                                                                                                                                                                                                            | PHCU/health centre                                                                           | <input type="text"/> |
|                                                                                                                                                                                                                                                                                                                                         |                                                                                | 338                                                                                                                                                                                                                            | NGO                                                                                          | <input type="text"/> |
| 339                                                                                                                                                                                                                                                                                                                                     | <b>IF YES:</b> How many times did you receive this visit in the last 6 months? | <b>Enter total number of times</b><br><b>IF 0 skip to 342</b>                                                                                                                                                                  | <input type="text"/>                                                                         |                      |
| 340                                                                                                                                                                                                                                                                                                                                     | How many of these visits were in last 3 months?                                | <b>Enter total number of times</b><br><b>IF 0 skip to 342</b>                                                                                                                                                                  | <input type="text"/>                                                                         |                      |
| 341                                                                                                                                                                                                                                                                                                                                     | How many of these visits were in last 1 month?                                 | <b>Enter total number of times</b>                                                                                                                                                                                             | <input type="text"/>                                                                         |                      |
| 342                                                                                                                                                                                                                                                                                                                                     | Who provided the most recent supervisory visit?<br><br><b>Select one</b>       | 1 = Woreda Health Office<br>2 = Health Centre<br>3 = NGO<br>4 = Woreda Health Office and Health center<br>5 = Woreda Health Office and NGO<br>6 = Health Center and NGO<br>7 = All three together (Woreda, Health Center, NGO) | <input type="text"/>                                                                         |                      |
| <b>IF YES to 335:</b> Did that visit include any of the following?<br><br><b>Read all the following</b>                                                                                                                                                                                                                                 |                                                                                | <b>For each: 1 = Yes 2 = No</b>                                                                                                                                                                                                |                                                                                              |                      |
|                                                                                                                                                                                                                                                                                                                                         |                                                                                | 343                                                                                                                                                                                                                            | Discussing early identification of pregnancy                                                 | <input type="text"/> |
|                                                                                                                                                                                                                                                                                                                                         |                                                                                | 344                                                                                                                                                                                                                            | Discussing provision focused ANC                                                             | <input type="text"/> |
|                                                                                                                                                                                                                                                                                                                                         |                                                                                | 345                                                                                                                                                                                                                            | Discussing promotion of institutional delivery                                               | <input type="text"/> |
|                                                                                                                                                                                                                                                                                                                                         |                                                                                | 346                                                                                                                                                                                                                            | Discussing safe and clean delivery                                                           | <input type="text"/> |
|                                                                                                                                                                                                                                                                                                                                         |                                                                                | 347                                                                                                                                                                                                                            | Discussing immediate newborn care including cord care (chlorohexidine)                       | <input type="text"/> |
|                                                                                                                                                                                                                                                                                                                                         |                                                                                | 348                                                                                                                                                                                                                            | Discussing recognition of asphyxia, initial stimulation, and resuscitation of newborn babies | <input type="text"/> |
|                                                                                                                                                                                                                                                                                                                                         |                                                                                | 349                                                                                                                                                                                                                            | Discussing prevention and management of hypothermia                                          | <input type="text"/> |
| 350                                                                                                                                                                                                                                                                                                                                     | Discussing management of pre-term and/or low                                   | <input type="text"/>                                                                                                                                                                                                           |                                                                                              |                      |

|     |                                                                                                                 |                                                                                                      |                          |
|-----|-----------------------------------------------------------------------------------------------------------------|------------------------------------------------------------------------------------------------------|--------------------------|
|     |                                                                                                                 | birth weight neonates                                                                                |                          |
|     | 351                                                                                                             | Discussing management of very severe disease in newborns                                             | <input type="checkbox"/> |
|     | 352                                                                                                             | Discussing diagnosis or treatment of suspected pneumonia                                             | <input type="checkbox"/> |
|     | 353                                                                                                             | Discussing diagnosis or treatment of diarrhoea                                                       | <input type="checkbox"/> |
|     | 354                                                                                                             | Discussing diagnosis or treatment of malaria                                                         | <input type="checkbox"/> |
|     | 355                                                                                                             | Discussing diagnosis or treatment of acute malnutrition                                              | <input type="checkbox"/> |
|     | 356                                                                                                             | Discussing HEW activities with WDA                                                                   | <input type="checkbox"/> |
|     | 357                                                                                                             | Observing record keeping                                                                             | <input type="checkbox"/> |
|     | 358                                                                                                             | Checking the register for consistency and completeness                                               | <input type="checkbox"/> |
|     | 359                                                                                                             | Checking supplies including training manuals, job aides, request forms                               | <input type="checkbox"/> |
|     | 360                                                                                                             | Delivering supplies including /training manuals, job aides, request forms                            | <input type="checkbox"/> |
|     | 361                                                                                                             | <u>Observing client Consultation with HEW</u>                                                        | <input type="checkbox"/> |
|     | 362                                                                                                             | Conducted postnatal household visits together to observe HEWs skill on checking general danger signs | <input type="checkbox"/> |
|     | 363                                                                                                             | Checking if they visited a sick neonate under treatment or that has been treated,                    | <input type="checkbox"/> |
|     | 364                                                                                                             | Providing <u>WRITTEN</u> feedback to you on your work                                                | <input type="checkbox"/> |
|     | 365                                                                                                             | <u>WRITTEN</u> feedback: copy of the last visit available and checked by the interviewer             | <input type="checkbox"/> |
| 366 | Did you receive a follow up visit within 6 weeks of CBNC training to assess and support your <b>CBNC work</b> ? | <b>1 = Yes</b><br><b>2 = No – GO TO 371</b><br><b>3 = No CBNC training –GO TO 371</b>                | <input type="checkbox"/> |
|     |                                                                                                                 | <b>For each: 1 = Yes 2 = No</b>                                                                      |                          |
|     | If received CBNC post-training visit who conducted 6 weeks follow up visit?<br><b>Select all that apply</b>     | 367 Zone                                                                                             | <input type="checkbox"/> |
|     |                                                                                                                 | 368 Woreda                                                                                           | <input type="checkbox"/> |
|     |                                                                                                                 | 369 Health Center                                                                                    | <input type="checkbox"/> |
|     |                                                                                                                 | 370 NGO                                                                                              | <input type="checkbox"/> |

|                                                                                                                     |                                                                                                                                                             |                                                                                                                                                                                                                           |                                                                     |                          |
|---------------------------------------------------------------------------------------------------------------------|-------------------------------------------------------------------------------------------------------------------------------------------------------------|---------------------------------------------------------------------------------------------------------------------------------------------------------------------------------------------------------------------------|---------------------------------------------------------------------|--------------------------|
| 371                                                                                                                 | Can you tell us whether or not you were satisfied with the QUALITY of supportive supervision received in last six months?<br><br><b>Do not read options</b> | <b>1 = Yes was satisfied</b><br><b>2 = No was not satisfied – GO TO 373</b><br><b>3 = Neither satisfied nor dissatisfied – GO TO 374</b><br><b>4 = no supportive supervision in the last 6 months</b><br><b>GO TO 379</b> | <input type="checkbox"/>                                            |                          |
| 372                                                                                                                 | <b>IF YES</b> , then what was the level of satisfaction?<br><br><b>Read options</b>                                                                         | <b>1. Fully satisfied -GO TO 379</b><br><b>2. Somewhat satisfied -GO TO 374</b>                                                                                                                                           | <input type="checkbox"/>                                            |                          |
| 373                                                                                                                 | <b>IF NO</b> , then what was the level of dissatisfaction?<br><br><b>Read options</b>                                                                       | <b>1. Fully dissatisfied</b><br><b>2. Somewhat dissatisfied</b>                                                                                                                                                           | <input type="checkbox"/>                                            |                          |
| How can the quality of the supervision be further improved:<br><br><b>Read list</b><br><b>Select all that apply</b> |                                                                                                                                                             | <b>For each: 1 = Yes 2 = No</b>                                                                                                                                                                                           |                                                                     |                          |
|                                                                                                                     |                                                                                                                                                             | 374                                                                                                                                                                                                                       | More visits                                                         | <input type="checkbox"/> |
|                                                                                                                     |                                                                                                                                                             | 375                                                                                                                                                                                                                       | More crash trainings during supervision                             | <input type="checkbox"/> |
|                                                                                                                     |                                                                                                                                                             | 376                                                                                                                                                                                                                       | More technical supervision                                          | <input type="checkbox"/> |
|                                                                                                                     |                                                                                                                                                             | 377                                                                                                                                                                                                                       | Other <b>can the quality of the supervision be further improved</b> | <input type="checkbox"/> |
|                                                                                                                     | 378                                                                                                                                                         | Specify _____                                                                                                                                                                                                             | <input type="checkbox"/>                                            |                          |

|                                                                                                                                                                                                                                                                                                                                          |                                                                                                                                                                                                                                              |                                                                                  |                          |
|------------------------------------------------------------------------------------------------------------------------------------------------------------------------------------------------------------------------------------------------------------------------------------------------------------------------------------------|----------------------------------------------------------------------------------------------------------------------------------------------------------------------------------------------------------------------------------------------|----------------------------------------------------------------------------------|--------------------------|
| <b>Interviewer:</b><br><i>I would now like to ask you some questions about Performance Review and Clinical Mentoring Meeting (PRCMM) By this I mean when NGO, health center and health post staff meet together to review records, discuss performance, and ways to improve your TECHNICAL skills and achieve targets for CBNC/ICCM?</i> |                                                                                                                                                                                                                                              |                                                                                  |                          |
| <b>INTERVIEWER: PLEASE STATE THE START AND END MONTHS THAT CAPTURE THE PAST 6 MONTHS FROM THE DATE OF THE INTERVIEW AND INSERT IT INTO THE QUESTION BELOW.</b>                                                                                                                                                                           |                                                                                                                                                                                                                                              |                                                                                  |                          |
| <b>LAST 6 MONTHS: STATE THE START &amp; END MONTHS</b>                                                                                                                                                                                                                                                                                   |                                                                                                                                                                                                                                              |                                                                                  |                          |
| START MONTH _____                                                                                                                                                                                                                                                                                                                        |                                                                                                                                                                                                                                              |                                                                                  |                          |
| END MONTH _____                                                                                                                                                                                                                                                                                                                          |                                                                                                                                                                                                                                              |                                                                                  |                          |
| 379                                                                                                                                                                                                                                                                                                                                      | In the past 6 months, did you participate in a PRCMM meeting, where the health center, health post and/or NGO staff met together to discuss performance, targets, and ways to improve HEWs' skills and achieve targets for CBNC and/or ICCM? | 1 = Yes<br>2 = No<br>3 = No CBNC and/or ICCM training                            | <input type="checkbox"/> |
| 380                                                                                                                                                                                                                                                                                                                                      | Since training of CBNC and/or ICCM, have you participated in any PRCM meeting conducted in your Health center catchment area?                                                                                                                | 1 = Yes<br>2 = No – GO TO MODULE 6                                               | <input type="checkbox"/> |
| 381                                                                                                                                                                                                                                                                                                                                      | Did the meeting extract data from the HEW's 0-2 month (newborn) registers?                                                                                                                                                                   | 1 = Yes<br>2 = No                                                                | <input type="checkbox"/> |
| 382                                                                                                                                                                                                                                                                                                                                      | At that meeting, did your health center staff get a chance to offer mentoring on how to improve your newborn illness management skills?                                                                                                      | 1 = Yes<br>2 = No                                                                | <input type="checkbox"/> |
| Did that meeting cover discussions on performance and targets on the following?<br><br><b>Read all the following</b>                                                                                                                                                                                                                     |                                                                                                                                                                                                                                              | <b>For each: 1 = Yes 2 = No</b>                                                  |                          |
|                                                                                                                                                                                                                                                                                                                                          | 383                                                                                                                                                                                                                                          | Early identification of pregnancy                                                | <input type="checkbox"/> |
|                                                                                                                                                                                                                                                                                                                                          | 384                                                                                                                                                                                                                                          | Focused ANC                                                                      | <input type="checkbox"/> |
|                                                                                                                                                                                                                                                                                                                                          | 385                                                                                                                                                                                                                                          | Promotion of institutional delivery                                              | <input type="checkbox"/> |
|                                                                                                                                                                                                                                                                                                                                          | 386                                                                                                                                                                                                                                          | Safe and clean delivery                                                          | <input type="checkbox"/> |
|                                                                                                                                                                                                                                                                                                                                          | 387                                                                                                                                                                                                                                          | Immediate newborn care including cord care (chlorohexidine)                      | <input type="checkbox"/> |
|                                                                                                                                                                                                                                                                                                                                          | 388                                                                                                                                                                                                                                          | Recognition of asphyxia, initial stimulation and resuscitation of newborn babies | <input type="checkbox"/> |
|                                                                                                                                                                                                                                                                                                                                          | 389                                                                                                                                                                                                                                          | Management of diarrhea among neonate                                             | <input type="checkbox"/> |
|                                                                                                                                                                                                                                                                                                                                          | 390                                                                                                                                                                                                                                          | Breast feeding among neonate                                                     | <input type="checkbox"/> |
|                                                                                                                                                                                                                                                                                                                                          | 391                                                                                                                                                                                                                                          | Immunization among neonate                                                       | <input type="checkbox"/> |
|                                                                                                                                                                                                                                                                                                                                          | 392                                                                                                                                                                                                                                          | Management of hypothermia                                                        | <input type="checkbox"/> |
|                                                                                                                                                                                                                                                                                                                                          | 393                                                                                                                                                                                                                                          | Management of pre-term and/or low birth weight neonates                          | <input type="checkbox"/> |
|                                                                                                                                                                                                                                                                                                                                          | 394                                                                                                                                                                                                                                          | Management of neonatal/very severe disease                                       | <input type="checkbox"/> |
|                                                                                                                                                                                                                                                                                                                                          | 395                                                                                                                                                                                                                                          | Register review                                                                  | <input type="checkbox"/> |
| 396                                                                                                                                                                                                                                                                                                                                      | Community level observation                                                                                                                                                                                                                  | <input type="checkbox"/>                                                         |                          |

| <b>MODULE 6: HEWS SERVICES PROVIDED IN THE LAST 3 MONTHS</b>                                                                                                          |                                                                                                                                  |                                                                                                                                                       |     |
|-----------------------------------------------------------------------------------------------------------------------------------------------------------------------|----------------------------------------------------------------------------------------------------------------------------------|-------------------------------------------------------------------------------------------------------------------------------------------------------|-----|
| <b>Interviewer: I would now like to ask you about the services you provided in the last 3 months.</b>                                                                 |                                                                                                                                  |                                                                                                                                                       |     |
| <b>REFER TO HEW'S RECORD BOOKS (AT THE HEALTH POST REGISTERS) TO COMPLETE THE FOLLOWING; <u>ONLY COUNT EVENTS ATTENDED BY THE SPECIFIC HEW BEING INTERVIEWED:</u></b> |                                                                                                                                  |                                                                                                                                                       |     |
| <b>INTERVIEWER: PLEASE STATE THE START AND END MONTHS THAT CAPTURE THE PAST 3 MONTHS FROM THE DATE OF THE INTERVIEW AND INSERT IT INTO THE QUESTION BELOW.</b>        |                                                                                                                                  |                                                                                                                                                       |     |
| <b><u>LAST 3 MONTHS: STATE THE START &amp; END MONTHS</u></b>                                                                                                         |                                                                                                                                  |                                                                                                                                                       |     |
| <b>START MONTH _____</b>                                                                                                                                              |                                                                                                                                  |                                                                                                                                                       |     |
| <b>END MONTH _____</b>                                                                                                                                                |                                                                                                                                  |                                                                                                                                                       |     |
| 397                                                                                                                                                                   | In the last three months did you use community <b>forums</b> and meeting to deliver maternal newborn and child health education? | 1 = Yes<br>2 = No – <b>GO TO 406</b>                                                                                                                  | _ _ |
| In the last three months did you meet any of the following to deliver maternal newborn and child health education?<br><br><b>Read list. Choose all that apply.</b>    | <b>For each: 1 = Yes 2 = No</b>                                                                                                  |                                                                                                                                                       |     |
|                                                                                                                                                                       | 398                                                                                                                              | Religious leaders                                                                                                                                     | _ _ |
|                                                                                                                                                                       | 399                                                                                                                              | Edir (Traditional community organization whose members assist each other during the mourning process)                                                 | _ _ |
|                                                                                                                                                                       | 400                                                                                                                              | Women's savings group                                                                                                                                 | _ _ |
|                                                                                                                                                                       | 401                                                                                                                              | Command post                                                                                                                                          | _ _ |
|                                                                                                                                                                       | 402                                                                                                                              | Traditional birth attendants                                                                                                                          | _ _ |
|                                                                                                                                                                       | 403                                                                                                                              | Other                                                                                                                                                 | _ _ |
|                                                                                                                                                                       | 404                                                                                                                              | Other Specify _____                                                                                                                                   |     |
| 405                                                                                                                                                                   | When was the last time you used community <b>forum</b> and meeting to deliver maternal newborn and child health education?       | _ _ _ / _ _ _ / _ _ _ <br>dd / mm / yy                                                                                                                |     |
| 406                                                                                                                                                                   | Did you conduct pregnant women conference in the community in the last 3 months?                                                 | 1 = Yes<br>2 = No – <b>GO TO 411</b>                                                                                                                  | _ _ |
| 407                                                                                                                                                                   | When was the last time you conducted a pregnant women's conference?                                                              | _ _ _ / _ _ _ / _ _ _ <br>dd / mm / yy                                                                                                                |     |
| 408                                                                                                                                                                   | How regularly do you conduct the pregnant women's conference?                                                                    | 1 = <b>Once a week</b><br>2 = <b>Every two weeks</b><br>3 = <b>Once a month</b><br>4 = <b>Every other month</b><br>5 = <b>Once every three months</b> | _ _ |



|     |                                                                                                                                   |                                                       |                      |
|-----|-----------------------------------------------------------------------------------------------------------------------------------|-------------------------------------------------------|----------------------|
| 409 | In the last pregnant women conference, how many women in your catchment area were pregnant?                                       | <b>Enter number</b><br><b>Enter 999 if don't know</b> | <input type="text"/> |
| 410 | Among them, how many of them attended the pregnant women's conference?<br>(The number should be $\leq$ numbers inserted in Q 408) | <b>Enter number</b>                                   | <input type="text"/> |
| 411 | Did you provide ANC to any women in the last three months?                                                                        | <b>1 = Yes</b><br><b>2 = No – GO TO 412</b>           | <input type="text"/> |
| 412 | <b>IF YES:</b> how many?                                                                                                          | <b>Enter number</b>                                   | <input type="text"/> |
| 413 | Did you refer any pregnant women from this health post to a health center or hospital in the last three months?                   | <b>1 = Yes</b><br><b>2 = No – GO TO 414</b>           | <input type="text"/> |
| 414 | <b>IF YES:</b> how many?                                                                                                          | <b>Enter number</b>                                   | <input type="text"/> |
| 415 | Did you see any women to provide postpartum care in the last three months?                                                        | <b>1 = Yes</b><br><b>2 = No – GO TO 416</b>           | <input type="text"/> |
| 416 | <b>IF YES:</b> How many women did you see for postpartum care in the last three months?                                           | <b>Enter number</b>                                   | <input type="text"/> |
| 417 | Did you refer any post-partum women from this health post to a health center or hospital in the past three months?                | <b>1 = Yes</b><br><b>2 = No – GO TO 418</b>           | <input type="text"/> |
| 418 | <b>IF YES:</b> How many?                                                                                                          | <b>Enter number</b>                                   | <input type="text"/> |
| 419 | Did you see any newborns to provide a postnatal check for in the last three months?                                               | <b>1 = Yes</b><br><b>2 = No – GO TO 420</b>           | <input type="text"/> |
| 420 | <b>IF YES:</b> How many newborns did you provide a postnatal check for in the last three months?                                  | <b>Enter number</b>                                   | <input type="text"/> |
| 421 | Did you refer any newborns from this health post to a health center or hospital in the past three months?                         | <b>1 = Yes</b><br><b>2 = No – GO TO 422</b>           | <input type="text"/> |
| 422 | <b>IF YES:</b> How many?                                                                                                          | <b>Enter number</b>                                   | <input type="text"/> |
| 423 | Did you give care for prevention of hypothermia in the last three months?                                                         | <b>1 = Yes</b><br><b>2 = No – GO TO 424</b>           | <input type="text"/> |
| 424 | <b>IF YES:</b> How many?                                                                                                          | <b>Enter number</b>                                   | <input type="text"/> |
| 425 | Did you give care for management of hypothermia in the last three months?                                                         | <b>1 = Yes</b><br><b>2 = No – GO TO 426</b>           | <input type="text"/> |
| 426 | <b>IF YES:</b> How many?                                                                                                          | <b>Enter number</b>                                   | <input type="text"/> |
| 427 | Did you provide care for pre-term and/or low birth weight neonates in the last three months?                                      | <b>1 = Yes</b><br><b>2 = No – GO TO 428</b>           | <input type="text"/> |
| 428 | <b>IF YES:</b> How many?                                                                                                          | <b>Enter number</b>                                   | <input type="text"/> |
| 429 | Did you identify newborns with suspected very severe disease in the                                                               | <b>1 = Yes</b><br><b>2 = No – GO TO 430</b>           | <input type="text"/> |

|     |                                                                                                                                                 |                                                                                                 |       |
|-----|-------------------------------------------------------------------------------------------------------------------------------------------------|-------------------------------------------------------------------------------------------------|-------|
|     | last three months?                                                                                                                              |                                                                                                 |       |
| 430 | <b>IF YES:</b> How many?                                                                                                                        | <b>Enter number</b>                                                                             | _     |
| 431 | Did you treat newborns with suspected very severe disease in the last three months?                                                             | <b>1 = Yes</b><br><b>2 = No – GO TO 433</b><br><b>3 = Antibiotics not available – GO TO 433</b> | _     |
| 432 | <b>IF YES:</b> how many?                                                                                                                        | <b>Enter number</b>                                                                             | _     |
| 433 | <b>IF YES:</b> how many completed the treatment at the health post?                                                                             | <b>Enter number</b>                                                                             | _     |
| 434 | Did you refer any newborns from this health post to a health center or hospital for very severe disease in the past three months?               | <b>1 = Yes</b><br><b>2 = No – GO TO 435</b>                                                     | _     |
| 435 | <b>IF YES:</b> How many?                                                                                                                        | <b>Enter number</b>                                                                             | _     |
| 436 | Did you see any newborns with diarrhea in the last three months?                                                                                | <b>1 = Yes</b><br><b>2 = No – GO TO 437</b>                                                     | _     |
| 437 | <b>IF YES,</b> how many?                                                                                                                        | <b>Enter number</b>                                                                             | _ _ _ |
| 438 | Did you see any newborns with jaundice in the last three months?                                                                                | <b>1 = Yes</b><br><b>2 = No – GO TO 439</b>                                                     | _     |
| 439 | <b>IF YES,</b> how many?                                                                                                                        | <b>Enter number</b>                                                                             | _ _ _ |
| 440 | Are the maternity record books completely up to date until the day before survey?(observe)                                                      | <b>1 = Yes</b><br><b>2 = No GO TO 442</b>                                                       | _     |
| 441 | What is number of maternity cases maintained in the last three months in the maternity register?                                                | <b>Enter number</b>                                                                             | _ _ _ |
| 442 | Did you see any children (2-59 months) for suspected pneumonia in the last three months?                                                        | <b>1 = Yes</b><br><b>2 = No – GO TO 443</b>                                                     | _     |
| 443 | <b>IF YES,</b> how many?                                                                                                                        | <b>Enter number</b>                                                                             | _ _ _ |
| 444 | Did you see any children (2-59 months) for diarrhea in the last three months?                                                                   | <b>1 = Yes</b><br><b>2 = No – GO TO 445</b>                                                     | _     |
| 445 | <b>IF YES,</b> how many?                                                                                                                        | <b>Enter number</b>                                                                             | _ _ _ |
| 446 | Did you see any children (2-59 months) for malaria in the last three months?                                                                    | <b>1 = Yes</b><br><b>2 = No – GO TO 447</b>                                                     | _     |
| 447 | <b>IF YES,</b> how many?                                                                                                                        | <b>Enter number</b>                                                                             | _ _ _ |
| 448 | Did you see any children (2-59 months) for acute malnutrition in the last three months?                                                         | <b>1 = Yes</b><br><b>2 = No – GO TO 449</b>                                                     | _     |
| 449 | <b>IF YES,</b> how many?                                                                                                                        | <b>Enter number</b>                                                                             | _ _ _ |
| 450 | Did you refer any children (2-59 months) from this health post to a health center or hospital for very severe disease in the past three months? | <b>1 = Yes</b><br><b>2 = No – Exit interview</b>                                                | _     |
| 451 | <b>IF YES:</b> How many?                                                                                                                        | <b>Enter number</b>                                                                             | _ _ _ |
